# Supplementary material for: Development of a risk model to predict prognosis in breast cancer based on cGAS-STING-related genes
Source: Front Genet. 2023 Mar 27;14:1121018. doi: 10.3389/fgene.2023.1121018 (PMC10083333; doi:10.3389/fgene.2023.1121018)
Supplement: Supplementary file 1 [file Table2.XLSX]

## Sheet: s2 
SupplementaryTable 2: Prognostic analysis of 35 genes with a univariate Cox regression model.
gene	p.value	HR	95L	95H	HR
POLR2K	3.4e-06	1.9 (1.5-2.5)	1.5	2.5	1.9
HSPA8	0.0002	1.6 (1.3-2.1)	1.3	2.1	1.6
PYCARD	0.0011	0.78 (0.68-0.91)	0.68	0.91	0.78
NFKBIE	0.0018	0.63 (0.47-0.84)	0.47	0.84	0.63
EIF2AK2	0.0063	1.3 (1.1-1.6)	1.1	1.6	1.3
JUN	0.0092	0.78 (0.65-0.94)	0.65	0.94	0.78
IFNG	0.014	0.93 (0.88-0.99)	0.88	0.99	0.93
CCL5	0.018	0.87 (0.77-0.98)	0.77	0.98	0.87
IL18	0.027	0.84 (0.71-0.98)	0.71	0.98	0.84
PRKDC	0.027	1.3 (1-1.6)	1	1.6	1.3
IL33	0.049	0.92 (0.85-1)	0.85	1	0.92
TNFRSF1B	0.069	0.85 (0.72-1)	0.72	1	0.85
RIPK3	0.097	0.89 (0.78-1)	0.78	1	0.89
ADAR	0.1	1.2 (0.96-1.6)	0.96	1.6	1.2
POLR3K	0.13	1.3 (0.94-1.7)	0.94	1.7	1.3
RNASET2	0.15	0.81 (0.6-1.1)	0.6	1.1	0.81
MAPK10	0.2	1.1 (0.96-1.2)	0.96	1.2	1.1
IKBKE	0.21	0.86 (0.69-1.1)	0.69	1.1	0.86
IFIH1	0.22	1.1 (0.94-1.3)	0.94	1.3	1.1
FCGR2A	0.23	1.1 (0.92-1.4)	0.92	1.4	1.1
OAS1	0.25	1.1 (0.94-1.2)	0.94	1.2	1.1
AIM2	0.41	0.96 (0.86-1.1)	0.86	1.1	0.96
HSPA1B	0.47	1.1 (0.87-1.3)	0.87	1.3	1.1
LTA	0.49	0.97 (0.89-1.1)	0.89	1.1	0.97
HSPA1A	0.58	1.1 (0.88-1.3)	0.88	1.3	1.1
ISG15	0.71	0.98 (0.88-1.1)	0.88	1.1	0.98
RNF125	0.75	0.97 (0.8-1.2)	0.8	1.2	0.97
IL6	0.82	1 (0.92-1.1)	0.92	1.1	1
TNF	0.85	0.99 (0.88-1.1)	0.88	1.1	0.99
IL1B	0.86	0.99 (0.86-1.1)	0.86	1.1	0.99
CASP10	0.9	1 (0.84-1.2)	0.84	1.2	1
CCL4	0.92	0.99 (0.87-1.1)	0.87	1.1	0.99
CXCL10	0.97	1 (0.91-1.1)	0.91	1.1	1
CCL4L2	0.88	1.010(0.889-1.148)	0.89	1.14	1.01
HSPA4	0.123	1.57(1.103-2.247)	1.103	1.57	2.24

## Sheet: s3 
SupplementaryTable 3：11 differential genes related to cGAS pathway and immune pathway between breast cancer tissues and normal tissues
gene	logFC	AveExpr	t	P.Value	adj.P.Val	B
CCL5	2.36711	4.10068	18.7271	2.59e-69	1.14e-68	146.331
IFNG	1.70099	-3.20869	10.2338	1.12e-23	2.19e-23	42.4095
HSPA8	1.6396	9.83998	27.2083	6.93e-129	8.45e-128	283.124
PYCARD	1.52783	4.63903	14.7407	1.59e-45	4.64e-45	91.6584
PRKDC	1.4459	7.84003	20.9247	8.4e-84	4.76e-83	179.436
NFKBIE	1.31104	3.92173	21.3027	2.24e-86	1.32e-85	185.559
IL18	1.21676	2.67606	13.656	1.01e-39	2.67e-39	78.6484
POLR2K	1.08958	5.60325	20.2252	4.23e-79	2.21e-78	168.671
EIF2AK2	1.07577	6.35232	19.9178	4.64e-77	2.34e-76	163.954
JUN	-1.59272	5.91887	-19.6917	1.44e-75	7.03e-75	160.542
IL33	-1.82046	5.48798	-16.7979	2.36e-57	8.52e-57	118.724

## Sheet: s4
SupplementaryTable 4: Clinical information of 1080 breast cancer patients.
sample	T_stage	N_stage	STAGE	TYPE	AGE	fustat	month	riskscore	group
TCGA.A2.A0CK	T3	N2	Stage III	Normal	60	0	136.63	2.8264	LowRisk
TCGA.AO.A1KR	T2	N0	Stage II	TNBC	51	0	82.56	2.84408	LowRisk
TCGA.A2.A0EN	T2	N0	Stage II	LumA	70	0	134.3	3.05004	LowRisk
TCGA.3C.AALI	T2	N1	Stage II	Her2	50	0	131.57	4.14202	LowRisk
TCGA.OL.A5RY	T1	N1	Stage II	Basal	52	0	24.7	4.29329	LowRisk
TCGA.GM.A2DN	T2	N0	Stage II	Normal	58	0	101.54	4.64038	LowRisk
TCGA.BH.A42U	T2	N0	Stage II	TNBC	80	0	110.51	4.78051	LowRisk
TCGA.B6.A0IJ	T3	N0	Stage II	Basal	42	0	233.44	5.3923	LowRisk
TCGA.OL.A5RX	T1	N0	Stage I	Normal	51	0	28.84	5.60745	LowRisk
TCGA.AR.A24H	T2	N0	Stage II	LumB	65	0	160.78	5.66438	LowRisk
TCGA.D8.A73U	T2	N0	Stage II	LumA	88	0	16.16	5.71375	LowRisk
TCGA.Z7.A8R5	T3	N1	Stage III	Normal	61	0	107.98	5.85747	LowRisk
TCGA.PE.A5DD	T2	N0	Stage II	LumA	64	0	64.16	5.88253	LowRisk
TCGA.A1.A0SF	T2	N0	Stage II	Normal	54	0	48.06	6.11188	LowRisk
TCGA.B6.A0RN	T1	N0	Stage I	TNBC	60	0	263.07	6.18941	LowRisk
TCGA.AR.A1AM	T3	N1	Stage III	Normal	52	0	98.26	6.2366	LowRisk
TCGA.GM.A2DD	T1	N0	Stage I	TNBC	53	0	74.97	6.33423	LowRisk
TCGA.E2.A1LH	T1	N0	Stage I	TNBC	59	0	106.67	6.34732	LowRisk
TCGA.BH.A0DX	T1	N0	Stage I	LumB	62	0	70.83	6.42239	LowRisk
TCGA.AO.A126	T2	N0	Stage II	Her2	39	0	108.64	6.56173	LowRisk
TCGA.LD.A66U	T2	N1	Stage II	LumA	44	0	21.22	6.60872	LowRisk
TCGA.AC.A3W5	T2	N0	Stage II	Her2	65	0	16.56	6.72148	LowRisk
TCGA.A2.A0SY	T3	N1	Stage III	LumA	62	0	44.25	6.73896	LowRisk
TCGA.AC.A3BB	T3	N2	Stage III	LumA	46	0	32.42	7.01026	LowRisk
TCGA.EW.A1OV	T2	N1	Stage II	TNBC	56	0	25.92	7.0182	LowRisk
TCGA.E9.A5FK	T2	N3	Stage III	Normal	60	0	26.68	7.02798	LowRisk
TCGA.AR.A0TT	T2	N2	Stage III	LumB	53	0	108.94	7.13886	LowRisk
TCGA.B6.A0I5	T2	N1	Stage II	LumA	49	0	281.08	7.21387	LowRisk
TCGA.PL.A8LY	T3	N0	Stage II	Normal	30	0	0.26	7.24906	LowRisk
TCGA.E2.A1LE	T2	N3	Stage III	Her2	71	1	28.88	7.38272	LowRisk
TCGA.A2.A0CW	T2	N1	Stage II	LumB	67	0	107.85	7.4337	LowRisk
TCGA.A2.A0CV	T2	N1	Stage II	LumA	41	0	98.92	7.47175	LowRisk
TCGA.OL.A5D7	T2	N0	Stage II	TNBC	70	0	58.48	7.54866	LowRisk
TCGA.E2.A1IJ	T1	N0	Stage I	LumA	57	0	28.42	7.65671	LowRisk
TCGA.E2.A14R	T2	N0	Stage II	TNBC	62	0	38.57	7.70086	LowRisk
TCGA.EW.A2FS	T2	N1	Stage II	Normal	41	0	52.69	7.79036	LowRisk
TCGA.C8.A8HQ	T2	N1	Stage II	NA	53	0	12.48	7.82194	LowRisk
TCGA.E2.A1IK	T1	N1	Stage II	Normal	71	0	59.13	7.85118	LowRisk
TCGA.E9.A1NC	T2	N1	Stage II	Basal	61	0	39.52	7.92823	LowRisk
TCGA.C8.A8HP	T2	N2	Stage III	NA	59	0	13.01	7.9941	LowRisk
TCGA.AR.A251	T2	N2	Stage III	Basal	51	0	99.54	8.09141	LowRisk
TCGA.AC.A3W6	T3	N1	Stage III	LumA	90	0	19.78	8.16884	LowRisk
TCGA.AC.A6IV	T2	N1	Stage II	Normal	47	0	18.66	8.34328	LowRisk
TCGA.GM.A2DL	T1	N0	Stage I	Her2	50	0	115.6	8.56118	LowRisk
TCGA.PE.A5DE	T2	N0	Stage II	LumA	41	0	86.89	8.56538	LowRisk
TCGA.5L.AAT0	T2	N0	Stage II	NA	42	0	48.52	8.67767	LowRisk
TCGA.BH.A0C3	T1	N0	Stage I	LumB	47	0	88.99	8.73312	LowRisk
TCGA.AO.A12A	T2	N0	Stage II	LumA	47	0	102.23	8.74619	LowRisk
TCGA.AO.A0JJ	T2	N1	Stage II	LumA	54	0	61.99	8.88128	LowRisk
TCGA.A2.A0EP	T1	N0	Stage I	Normal	56	0	118.36	8.92356	LowRisk
TCGA.A2.A0SU	T2	N0	Stage II	Normal	66	0	54.6	9.00909	LowRisk
TCGA.OL.A5RU	T1	N1	Stage II	LumA	63	0	40.05	9.07295	LowRisk
TCGA.BH.A0H5	T1	N0	Stage I	Normal	45	0	53.22	9.11354	LowRisk
TCGA.AC.A2BM	T2	N1	Stage II	LumB	41	0	99.28	9.14945	LowRisk
TCGA.OL.A5DA	T2	N0	Stage II	LumA	61	0	58.57	9.22506	LowRisk
TCGA.EW.A3U0	T3	N1	Stage III	TNBC	61	0	17.48	9.28823	LowRisk
TCGA.E9.A1RF	T2	N2	Stage III	Her2	68	0	6.57	9.29901	LowRisk
TCGA.BH.A5J0	T1	N0	Stage I	LumA	63	0	23.49	9.34005	LowRisk
TCGA.5L.AAT1	T2	N0	Stage IV	NA	63	0	48.32	9.34197	LowRisk
TCGA.AR.A5QM	T2	N0	Stage II	LumA	62	0	73.29	9.37815	LowRisk
TCGA.A2.A0ST	T1	N1	Stage II	TNBC	62	0	99.11	9.42573	LowRisk
TCGA.BH.A0B0	T1	N0	Stage I	LumA	56	0	81.37	9.49746	LowRisk
TCGA.A2.A3XZ	T1	N0	Stage I	Basal	46	0	50.33	9.53521	LowRisk
TCGA.XX.A89A	T3	N0	Stage II	Normal	68	0	16.03	9.56673	LowRisk
TCGA.BH.A0BW	T1	N0	Stage I	TNBC	71	0	77.89	9.58363	LowRisk
TCGA.A2.A0EO	T1	N0	Stage I	LumA	54	0	80.22	9.61334	LowRisk
TCGA.LD.A74U	T3	N3	Stage III	Normal	79	0	13.21	9.62419	LowRisk
TCGA.EW.A423	T2	N0	Stage II	LumB	75	0	17.51	9.66081	LowRisk
TCGA.EW.A3E8	T3	N0	Stage II	LumA	60	0	34	9.66914	LowRisk
TCGA.B6.A408	T2	N3	Stage III	LumA	55	0	68.07	9.68713	LowRisk
TCGA.GM.A3XN	T1	N2	Stage III	Normal	44	0	66.33	9.83499	LowRisk
TCGA.B6.A401	T1	N1	Stage II	Normal	47	0	85.28	9.91623	LowRisk
TCGA.EW.A1IZ	T2	N2	Stage III	Normal	53	0	18.2	10.0265	LowRisk
TCGA.BH.A0HA	T1	N0	Stage I	LumA	31	0	52.92	10.0409	LowRisk
TCGA.AR.A24S	T1	N0	Stage I	LumB	61	0	97.77	10.0516	LowRisk
TCGA.BH.A0BR	T1	N0	Stage I	Her2	59	0	76.54	10.1211	LowRisk
TCGA.BH.A0BC	T2	N3	Stage III	LumA	60	0	32	10.1821	LowRisk
TCGA.BH.A0DK	T2	N0	Stage II	Normal	49	0	13.9	10.2054	LowRisk
TCGA.A2.A04X	T2	N0	Stage II	Her2	34	0	55.39	10.2505	LowRisk
TCGA.D8.A1JG	T2	N0	Stage II	TNBC	62	0	52.96	10.3015	LowRisk
TCGA.B6.A0RO	T4	N1	Stage III	LumA	71	0	161.93	10.3646	LowRisk
TCGA.BH.A0B5	T2	N2	Stage III	Basal	40	0	70.17	10.4172	LowRisk
TCGA.B6.A0WT	T2	N1	Stage II	LumA	61	0	188.53	10.4757	LowRisk
TCGA.AO.A129	T2	N1	Stage II	TNBC	29	0	107.95	10.5044	LowRisk
TCGA.AR.A24M	T2	N2	Stage III	LumA	38	0	120.24	10.5768	LowRisk
TCGA.BH.A0B7	T2	N1	Stage II	Her2	42	0	84.07	10.6685	LowRisk
TCGA.E2.A14P	T2	N3	Stage III	Her2	79	0	40.93	10.6881	LowRisk
TCGA.AC.A23G	T1	N1	Stage II	Normal	76	0	73.85	10.771	LowRisk
TCGA.AC.A3QP	T2	N1	Stage II	Normal	79	0	22.17	10.8754	LowRisk
TCGA.B6.A0RT	T3	N1	Stage III	TNBC	39	0	89.39	10.9073	LowRisk
TCGA.BH.A0H3	T1	N0	Stage I	LumA	46	0	63.34	11.0035	LowRisk
TCGA.BH.A0DI	T2	N1	Stage II	Normal	63	0	29.96	11.0815	LowRisk
TCGA.E9.A1R0	T1	N1	Stage II	LumA	58	0	28.25	11.1045	LowRisk
TCGA.BH.A18H	T1	N0	Stage I	LumA	63	0	21.42	11.231	LowRisk
TCGA.AO.A0JG	T2	N2	Stage III	LumA	49	0	26.22	11.2446	LowRisk
TCGA.B6.A0RE	NA	N0	NA	TNBC	61	0	255.49	11.2518	LowRisk
TCGA.A7.A5ZX	T2	N3	Stage III	Normal	48	0	11.04	11.2596	LowRisk
TCGA.AR.A0TX	T1	N1	Stage II	Her2	64	0	64.78	11.4406	LowRisk
TCGA.AR.A24R	T1	N2	Stage III	LumB	45	0	112.68	11.5319	LowRisk
TCGA.AR.A24T	T3	N3	Stage III	LumA	46	0	105.19	11.539	LowRisk
TCGA.EW.A1J2	T1	N1	NA	LumA	50	0	13.24	11.6398	LowRisk
TCGA.B6.A40B	T1	N0	Stage I	LumA	76	0	103.55	11.6471	LowRisk
TCGA.A2.A04Q	T1	N0	Stage I	TNBC	48	0	78.35	11.671	LowRisk
TCGA.OL.A5RV	T2	N3	Stage III	Normal	43	0	34.89	11.706	LowRisk
TCGA.AR.A5QP	T2	N1	Stage II	Normal	54	0	38.93	11.726	LowRisk
TCGA.EW.A1P7	T2	N0	Stage II	TNBC	59	0	30.06	11.8008	LowRisk
TCGA.AO.A12D	T1	N1	Stage II	Her2	43	0	82.62	11.8106	LowRisk
TCGA.BH.A0DT	T1	N1	Stage II	LumA	41	0	78.94	11.8112	LowRisk
TCGA.AR.A1AQ	T2	N0	Stage II	TNBC	49	0	99.24	11.9418	LowRisk
TCGA.E2.A15I	T2	N0	Stage II	LumA	44	0	55.58	12.1046	LowRisk
TCGA.A2.A04N	T1	N0	Stage I	LumA	66	0	143.04	12.1501	LowRisk
TCGA.AR.A1AI	T2	N0	Stage II	TNBC	47	0	108.28	12.1545	LowRisk
TCGA.OK.A5Q2	T2	N1	Stage II	Normal	59	0	2.1	12.1948	LowRisk
TCGA.BH.A0B6	T1	N0	Stage I	LumA	47	0	81.57	12.306	LowRisk
TCGA.AR.A255	T1	N0	Stage I	LumA	62	0	70.99	12.3801	LowRisk
TCGA.BH.A0AZ	T3	N1	Stage III	Normal	47	0	63.04	12.3824	LowRisk
TCGA.BH.A0HF	T1	N0	Stage I	LumA	77	0	23.88	12.4603	LowRisk
TCGA.E2.A15K	T2	N1	Stage II	LumB	58	0	9.03	12.4698	LowRisk
TCGA.GM.A4E0	T3	N3	Stage III	Normal	67	0	71.98	12.5226	LowRisk
TCGA.A2.A0EV	T1	N0	Stage I	LumA	80	0	31.8	12.5789	LowRisk
TCGA.S3.A6ZF	T2	N0	Stage II	LumB	64	0	18.79	12.6294	LowRisk
TCGA.E2.A10C	T2	N1	Stage II	LumB	54	0	40.08	12.6547	LowRisk
TCGA.A2.A0ER	T1	N1	Stage I	LumB	63	0	74.34	12.6608	LowRisk
TCGA.AR.A252	T1	N0	Stage I	LumA	50	0	93.23	12.7506	LowRisk
TCGA.A2.A0CZ	T2	N0	Stage II	Normal	46	0	53.09	12.7519	LowRisk
TCGA.OL.A66L	T1	N0	Stage I	LumA	71	0	42.74	12.793	LowRisk
TCGA.B6.A0IQ	T3	N1	Stage III	TNBC	40	0	140.77	12.798	LowRisk
TCGA.EW.A1OW	T2	N0	Stage II	TNBC	58	0	22.8	12.8067	LowRisk
TCGA.A7.A5ZW	T1	N1	Stage II	LumA	47	0	10.71	12.8358	LowRisk
TCGA.BH.A0DP	T3	N0	Stage II	LumA	60	0	15.64	12.9353	LowRisk
TCGA.AO.A0J4	T1	N0	Stage I	TNBC	41	0	52.14	12.9722	LowRisk
TCGA.AO.A03L	T3	N2	Stage III	Her2	34	0	80.22	13.0342	LowRisk
TCGA.A2.A0EQ	T2	N0	Stage II	Her2	64	0	79.7	13.0611	LowRisk
TCGA.BH.A8G0	T2	N1	Stage II	Normal	54	0	21.75	13.0829	LowRisk
TCGA.AO.A124	T2	N0	Stage II	TNBC	38	0	115.18	13.1249	LowRisk
TCGA.AR.A0TQ	T3	N1	Stage III	Her2	27	0	98.26	13.1652	LowRisk
TCGA.A2.A0T1	T3	N3	Stage III	Her2	55	0	17.12	13.246	LowRisk
TCGA.BH.A0DE	T2	N0	Stage II	LumA	62	0	77.92	13.2618	LowRisk
TCGA.BH.A209	T1	N0	Stage I	LumB	77	1	130.06	13.2941	LowRisk
TCGA.AN.A0FF	T1	N0	Stage I	LumB	32	0	5.65	13.3261	LowRisk
TCGA.BH.A0BL	T1	N0	Stage I	TNBC	35	0	74.84	13.3443	LowRisk
TCGA.D8.A1JC	T2	N2	Stage III	LumB	59	0	15.77	13.3862	LowRisk
TCGA.E9.A229	T1	N0	Stage I	LumA	37	0	37.71	13.5952	LowRisk
TCGA.A2.A0ES	T2	N0	Stage II	Normal	52	0	71.94	13.6006	LowRisk
TCGA.A2.A4S1	T2	N0	Stage II	Basal	66	0	26.94	13.6059	LowRisk
TCGA.E2.A2P6	T2	N1	Stage II	LumB	77	0	34.53	13.6163	LowRisk
TCGA.AC.A23C	T2	N1	Stage II	LumA	62	0	19.22	13.6219	LowRisk
TCGA.A2.A0D3	T1	N0	Stage I	LumA	42	0	61.53	13.6261	LowRisk
TCGA.A2.A0CL	T3	N2	Stage III	Basal	37	0	99.05	13.7	LowRisk
TCGA.AC.A6IX	T2	N3	Stage III	LumA	49	0	12.25	13.7194	LowRisk
TCGA.C8.A26Y	T2	N0	Stage II	TNBC	90	0	12.94	13.724	LowRisk
TCGA.AR.A24X	T2	N0	Stage II	LumA	52	0	98.69	13.7797	LowRisk
TCGA.A7.A3IY	T1	N0	Stage I	Normal	71	0	11.33	13.7927	LowRisk
TCGA.A2.A3XT	T2	N1	Stage II	TNBC	45	0	91	13.8497	LowRisk
TCGA.BH.A0EB	T1	N0	Stage I	LumA	69	0	24.47	13.8927	LowRisk
TCGA.A7.A13H	T2	N1	Stage II	LumA	61	0	29.53	13.8972	LowRisk
TCGA.AO.A128	T2	N0	Stage II	TNBC	61	0	106.7	13.9038	LowRisk
TCGA.A2.A0CQ	T1	N0	Stage I	LumA	62	0	88.53	13.9067	LowRisk
TCGA.A2.A0YI	T1	N0	Stage I	LumA	62	0	49.44	13.9079	LowRisk
TCGA.D8.A1XL	T2	N1	Stage II	Her2	34	0	19.91	13.9353	LowRisk
TCGA.JL.A3YW	T2	N1	Stage II	Her2	49	0	11.83	13.9675	LowRisk
TCGA.AR.A0U0	T2	N1	Stage II	TNBC	73	0	65.31	13.9857	LowRisk
TCGA.A7.A425	T3	N3	Stage III	Normal	70	0	14.68	14.1203	LowRisk
TCGA.AN.A0FN	T1	N0	Stage I	LumA	61	0	7.16	14.2073	LowRisk
TCGA.BH.A28O	T3	N3	Stage III	Normal	50	0	36.79	14.2295	LowRisk
TCGA.E2.A1B5	T2	N0	Stage II	Normal	46	0	32.33	14.3279	LowRisk
TCGA.AO.A0JE	T2	N2	Stage III	Her2	53	0	76.71	14.4611	LowRisk
TCGA.AC.A3HN	T2	N1	Stage II	LumA	87	0	16.29	14.4813	LowRisk
TCGA.EW.A2FR	T1	N3	Stage III	Her2	59	0	54.96	14.5944	LowRisk
TCGA.A8.A08R	T2	N1	Stage II	TNBC	52	0	0.99	14.6061	LowRisk
TCGA.GI.A2C9	T3	N0	Stage II	TNBC	58	0	109.79	14.6328	LowRisk
TCGA.AO.A1KQ	T4	N1	Stage III	LumB	84	0	61.83	14.6438	LowRisk
TCGA.AC.A2B8	T3	N0	Stage II	LumA	84	0	22.24	14.6505	LowRisk
TCGA.MS.A51U	T2	N1	Stage II	LumA	44	0	22.37	14.6703	LowRisk
TCGA.BH.A0AU	T2	N0	Stage II	LumB	45	0	62.88	14.6887	LowRisk
TCGA.E2.A570	T1	N1	Stage I	LumA	47	0	30.58	14.6904	LowRisk
TCGA.A2.A3XW	T2	N1	Stage II	Normal	42	0	56.24	14.7077	LowRisk
TCGA.A7.A426	T3	N3	Stage III	Normal	50	0	11.96	14.7409	LowRisk
TCGA.E2.A1LI	T2	N1	Stage II	TNBC	57	0	102.53	14.7549	LowRisk
TCGA.AC.A8OS	T2	N0	Stage II	NA	71	0	2.3	14.7643	LowRisk
TCGA.LL.A5YN	T2	N0	Stage II	Her2	46	0	14.68	14.7899	LowRisk
TCGA.AC.A2QI	T3	N1	Stage III	LumA	76	0	19.32	14.8121	LowRisk
TCGA.E2.A3DX	T2	N3	Stage III	LumA	43	0	43.53	14.8597	LowRisk
TCGA.AC.A5XS	T2	N0	Stage II	LumB	74	0	19.32	14.8657	LowRisk
TCGA.E2.A1IF	T1	N0	Stage I	Normal	74	0	37.39	14.9383	LowRisk
TCGA.S3.AA17	T2	N1	Stage II	LumB	64	0	13.93	14.9562	LowRisk
TCGA.3C.AAAU	NA	NA	NA	LumB	55	0	132.95	14.9567	LowRisk
TCGA.BH.A0C7	T2	N1	Stage II	LumB	48	0	90.9	14.9731	LowRisk
TCGA.A2.A0YL	T3	N2	Stage III	Normal	48	0	48.42	15.0017	LowRisk
TCGA.AC.A8OQ	T2	N1	Stage II	Basal	72	0	1.12	15.0657	LowRisk
TCGA.BH.A0BM	T2	N1	Stage II	LumA	54	0	61.63	15.0672	LowRisk
TCGA.3C.AALJ	T2	N1	Stage II	LumB	62	0	48.42	15.0952	LowRisk
TCGA.EW.A424	T3	N1	Stage III	Normal	51	0	23.49	15.1152	LowRisk
TCGA.E2.A1L8	T2	N1	Stage II	LumA	52	0	73.59	15.1418	LowRisk
TCGA.GM.A5PV	T2	N1	Stage II	LumA	63	0	13.53	15.2267	LowRisk
TCGA.A7.A4SA	T2	N1	Stage II	LumA	40	0	14.91	15.3142	LowRisk
TCGA.D8.A3Z6	T3	N3	Stage III	LumA	56	0	18.5	15.3405	LowRisk
TCGA.OL.A66H	T1	N1	Stage I	LumA	NA	0	26.56	15.4319	LowRisk
TCGA.GM.A3NW	T2	N0	Stage II	Normal	63	0	110.41	15.4597	LowRisk
TCGA.BH.A0BT	T1	N1	Stage II	LumA	56	0	77.69	15.4966	LowRisk
TCGA.AR.A1AP	T1	N0	Stage I	LumA	80	0	93.82	15.5608	LowRisk
TCGA.D8.A3Z5	T2	N3	Stage III	Normal	54	0	33.34	15.6601	LowRisk
TCGA.Z7.A8R6	T1	N0	Stage I	LumB	46	0	106.96	15.6644	LowRisk
TCGA.AO.A0JD	T3	N1	Stage III	Basal	59	0	71.94	15.6825	LowRisk
TCGA.A7.A2KD	T2	N2	Stage III	LumB	53	0	22.31	15.6972	LowRisk
TCGA.A8.A0A6	T2	N3	Stage III	LumA	64	0	21.02	15.7623	LowRisk
TCGA.GM.A2D9	T1	N0	Stage I	LumA	69	1	59.53	15.766	LowRisk
TCGA.B6.A0RI	T4	N1	Stage III	LumB	44	0	234.1	15.7804	LowRisk
TCGA.AR.A2LM	T1	N1	Stage II	LumA	49	0	63.57	15.811	LowRisk
TCGA.B6.A0IP	T1	N0	Stage I	LumA	74	1	128.98	15.856	LowRisk
TCGA.LL.A441	T1	N0	Stage I	TNBC	62	0	32.72	15.8589	LowRisk
TCGA.BH.A0BQ	T1	N0	Stage I	LumA	39	0	74.08	15.898	LowRisk
TCGA.E2.A1BD	T2	N0	Stage II	LumA	53	0	37.22	15.9031	LowRisk
TCGA.C8.A1HF	T2	N0	Stage II	Her2	48	0	10.91	15.9209	LowRisk
TCGA.AR.A1AU	T2	N2	Stage III	Normal	39	0	94.22	15.9291	LowRisk
TCGA.BH.A0WA	T1	N0	Stage I	TNBC	82	0	23.03	15.9445	LowRisk
TCGA.AR.A5QQ	T3	N1	Stage III	TNBC	68	1	10.58	16.0287	LowRisk
TCGA.E9.A22A	T2	N0	Stage II	Her2	74	0	39.06	16.0697	LowRisk
TCGA.AO.A0JF	T1	N1	Stage II	LumA	68	0	65.05	16.0702	LowRisk
TCGA.OL.A5D8	T3	N0	Stage II	LumA	40	0	31.96	16.077	LowRisk
TCGA.A2.A0EW	T1	N3	Stage III	Normal	53	1	61.89	16.1304	LowRisk
TCGA.AN.A046	T2	N0	Stage II	LumA	68	0	0.33	16.1524	LowRisk
TCGA.A1.A0SN	T1	N1	Stage II	LumB	50	0	39.29	16.1974	LowRisk
TCGA.BH.A0W4	T2	N0	Stage II	Normal	46	0	24.93	16.2244	LowRisk
TCGA.BH.A0BG	T1	N0	Stage I	TNBC	73	0	61.47	16.2393	LowRisk
TCGA.B6.A0IA	T2	N0	Stage II	LumB	51	0	275.66	16.2753	LowRisk
TCGA.AO.A125	T2	N0	Stage II	LumA	72	0	113.53	16.2977	LowRisk
TCGA.AR.A1AX	T1	N0	Stage I	Normal	64	0	86.37	16.3455	LowRisk
TCGA.A8.A09M	T2	N3	Stage III	LumB	75	0	33.05	16.3579	LowRisk
TCGA.A2.A0CX	T2	N0	Stage II	Her2	52	0	56.77	16.3819	LowRisk
TCGA.A2.A0EY	T2	N1	Stage II	Her2	62	0	63.24	16.4225	LowRisk
TCGA.AC.A62Y	T2	N1	Stage II	LumA	79	0	17.41	16.4449	LowRisk
TCGA.A7.A0CD	T1	N0	Stage I	LumA	66	0	38.27	16.4488	LowRisk
TCGA.E9.A227	T2	N1	Stage II	LumA	42	0	32.03	16.5581	LowRisk
TCGA.A2.A3Y0	T2	N1	Stage II	Basal	57	0	50.79	16.5693	LowRisk
TCGA.BH.A0HP	T3	N2	Stage III	Normal	65	0	13.6	16.5791	LowRisk
TCGA.LL.A440	T1	N0	Stage I	Normal	61	0	24.93	16.6021	LowRisk
TCGA.A2.A0SW	T2	N2	Stage IV	LumB	82	1	44.84	16.6053	LowRisk
TCGA.BH.A2L8	T2	N0	Stage II	Normal	45	0	20.11	16.6458	LowRisk
TCGA.S3.AA15	T2	N1	Stage II	TNBC	51	0	17.25	16.6684	LowRisk
TCGA.BH.A0DH	T2	N1	Stage II	LumA	63	0	37.98	16.7588	LowRisk
TCGA.BH.A0DL	T2	N0	Stage II	Basal	64	0	78.22	16.8136	LowRisk
TCGA.BH.A0E2	T2	N2	Stage III	Normal	49	0	14.29	16.8282	LowRisk
TCGA.E9.A248	T2	N0	Stage II	Basal	51	0	1.94	16.8641	LowRisk
TCGA.BH.A0HB	T1	N0	Stage I	LumB	55	0	26.48	16.8805	LowRisk
TCGA.LL.A7T0	T2	N1	Stage II	LumB	70	0	12.35	16.8834	LowRisk
TCGA.BH.A0W7	T1	N0	Stage I	Her2	49	0	44.78	16.9239	LowRisk
TCGA.D8.A1JB	T2	N1	Stage II	LumA	54	0	55.45	16.9303	LowRisk
TCGA.A8.A06T	T3	N1	Stage III	LumB	75	0	53.02	16.9659	LowRisk
TCGA.A2.A0YC	T2	N1	Stage II	LumB	59	0	32.52	17.0545	LowRisk
TCGA.B6.A0RG	T3	N0	Stage II	TNBC	26	0	68.4	17.1033	LowRisk
TCGA.BH.A0E9	T2	N1	Stage II	Normal	53	0	81.77	17.1042	LowRisk
TCGA.A2.A3KC	T2	N1	Stage II	Normal	55	0	36.2	17.1176	LowRisk
TCGA.C8.A27B	T3	N0	Stage II	TNBC	48	0	14.42	17.1607	LowRisk
TCGA.D8.A27K	T2	N1	Stage II	LumA	47	0	48	17.1817	LowRisk
TCGA.B6.A0IB	T3	N3	Stage IV	LumB	64	1	129.47	17.1929	LowRisk
TCGA.AR.A1AW	T2	N0	Stage II	LumB	65	0	86.47	17.2188	LowRisk
TCGA.A7.A4SC	T3	N0	Stage II	LumA	62	0	14.65	17.2717	LowRisk
TCGA.AR.A2LL	T3	N0	Stage II	LumB	70	0	66.1	17.2903	LowRisk
TCGA.E9.A22D	T2	N0	Stage II	LumB	38	0	41	17.2962	LowRisk
TCGA.B6.A0IG	T2	N1	Stage II	Her2	50	1	146.39	17.2978	LowRisk
TCGA.B6.A0X0	T1	N0	Stage I	LumA	54	1	129.6	17.3126	LowRisk
TCGA.D8.A147	T2	N0	NA	TNBC	45	0	19.19	17.3167	LowRisk
TCGA.AR.A250	T2	N0	Stage II	Her2	58	0	88.93	17.404	LowRisk
TCGA.BH.A8FZ	T1	N0	Stage I	Normal	58	0	18.86	17.4363	LowRisk
TCGA.AN.A0AJ	T3	N0	Stage II	Her2	79	0	9.95	17.538	LowRisk
TCGA.D8.A1XO	T2	N1	Stage II	LumA	56	0	55.26	17.5538	LowRisk
TCGA.A8.A08P	T2	N2	Stage III	LumB	70	0	30.98	17.56	LowRisk
TCGA.AC.A2FF	T2	N1	Stage II	Normal	40	0	90.64	17.605	LowRisk
TCGA.E2.A14T	T2	N0	Stage II	LumA	52	0	75.92	17.6893	LowRisk
TCGA.AQ.A54O	T2	N0	Stage II	LumB	51	0	32.88	17.6897	LowRisk
TCGA.B6.A40C	T3	N0	Stage II	Her2	51	0	71.09	17.7452	LowRisk
TCGA.A7.A0CE	T2	N0	Stage II	TNBC	57	0	35.28	17.7512	LowRisk
TCGA.A2.A0T4	T2	N0	Stage II	LumB	62	0	20.5	17.8142	LowRisk
TCGA.AR.A2LN	T2	N0	Stage II	Normal	65	0	38.14	17.8408	LowRisk
TCGA.A7.A0CG	T2	N0	Stage II	Normal	78	0	34.26	17.8728	LowRisk
TCGA.E2.A1L9	T1	N1	Stage II	LumA	40	0	19.65	17.9487	LowRisk
TCGA.D8.A27P	T1	N0	Stage I	LumA	64	0	1.61	17.9545	LowRisk
TCGA.D8.A1X8	T1	N2	Stage III	LumA	62	0	25.72	18.0176	LowRisk
TCGA.LL.A5YL	T2	N1	Stage II	Her2	64	0	17.05	18.0337	LowRisk
TCGA.D8.A13Z	T2	N2	NA	TNBC	51	0	20.86	18.1394	LowRisk
TCGA.B6.A0X1	T2	N1	NA	Basal	48	1	244.91	18.1661	LowRisk
TCGA.B6.A402	T1	N0	Stage I	TNBC	47	0	74.93	18.2013	LowRisk
TCGA.C8.A26X	T1	N1	Stage II	TNBC	58	0	12.35	18.2036	LowRisk
TCGA.D8.A73X	T2	N0	Stage II	LumA	53	0	25.2	18.2063	LowRisk
TCGA.E2.A10F	T2	N0	Stage II	LumA	47	0	28.84	18.2139	LowRisk
TCGA.EW.A1J1	T2	N1	Stage II	LumA	38	0	18.89	18.2178	LowRisk
TCGA.B6.A0IH	T3	N1	Stage III	LumA	81	1	112.29	18.2406	LowRisk
TCGA.A2.A0D2	T2	N0	Stage II	TNBC	45	0	33.74	18.2481	LowRisk
TCGA.B6.A0IO	T2	N0	Stage II	LumB	66	0	165.64	18.2643	LowRisk
TCGA.E9.A1N9	T2	N0	Stage II	Basal	58	0	36.17	18.3292	LowRisk
TCGA.V7.A7HQ	T1	N2	Stage III	NA	75	0	66.79	18.355	LowRisk
TCGA.E9.A1R4	T1	N0	Stage I	LumB	66	0	6.11	18.3876	LowRisk
TCGA.AC.A8OP	T1	N0	Stage I	LumA	72	0	20.17	18.3892	LowRisk
TCGA.E9.A1RI	T1	N2	Stage III	LumA	43	0	47.6	18.3928	LowRisk
TCGA.E2.A15A	T2	N3	Stage III	LumB	45	0	23.32	18.4366	LowRisk
TCGA.OL.A66I	T1	N1	Stage II	TNBC	36	0	23.46	18.5844	LowRisk
TCGA.AO.A12C	T2	N1	Stage II	LumA	42	0	77.92	18.6101	LowRisk
TCGA.A8.A0AD	T1	N0	Stage I	LumA	83	0	38.01	18.6282	LowRisk
TCGA.LL.A6FP	T2	NA	Stage II	LumA	90	0	22.24	18.6935	LowRisk
TCGA.E2.A1LA	T1	N1	Stage II	LumB	59	0	24.57	18.7075	LowRisk
TCGA.S3.A6ZG	T2	N1	Stage II	LumB	71	0	18.46	18.7291	LowRisk
TCGA.E2.A573	T1	N0	Stage I	TNBC	48	0	34.89	18.7344	LowRisk
TCGA.AR.A254	T2	N2	Stage III	Her2	50	0	85.58	18.7357	LowRisk
TCGA.EW.A6SD	T2	N1	Stage II	NA	32	0	33.18	18.7725	LowRisk
TCGA.D8.A27L	T1	N2	Stage III	LumA	49	0	16.39	18.8266	LowRisk
TCGA.A2.A0CO	T3	N0	Stage II	Normal	85	1	114.72	18.8407	LowRisk
TCGA.A7.A26G	T2	N0	Stage II	TNBC	50	0	23.72	18.8426	LowRisk
TCGA.D8.A1XT	T1	N1	Stage II	Her2	61	0	16.62	18.8685	LowRisk
TCGA.B6.A0RQ	T3	N0	Stage II	Normal	68	1	140.18	18.8835	LowRisk
TCGA.E2.A14Y	T2	N0	Stage II	Basal	35	0	69.28	18.9594	LowRisk
TCGA.D8.A140	T2	N1	Stage II	LumA	62	0	13.24	18.9945	LowRisk
TCGA.E2.A1AZ	T2	N1	Stage II	TNBC	63	0	76.51	19.0758	LowRisk
TCGA.GM.A2DO	T1	N0	Stage I	LumB	54	0	85.28	19.1119	LowRisk
TCGA.E2.A1IO	T1	N0	Stage I	LumA	37	0	60.94	19.1748	LowRisk
TCGA.AC.A3TN	T3	N0	Stage II	LumA	75	0	14.98	19.2001	LowRisk
TCGA.BH.A0DD	T2	N1	Stage II	LumB	58	0	81.67	19.2374	LowRisk
TCGA.AR.A1AO	T1	N1	Stage II	Basal	47	0	86.01	19.2719	LowRisk
TCGA.A8.A07Z	T2	N0	Stage II	LumB	85	0	45.04	19.2874	LowRisk
TCGA.AN.A0XU	T2	N0	Stage II	TNBC	54	0	0.33	19.2917	LowRisk
TCGA.AO.A0J8	T2	N0	Stage II	LumA	61	0	22.34	19.353	LowRisk
TCGA.A2.A0CP	T1	N0	Stage I	Normal	60	0	92.41	19.3751	LowRisk
TCGA.BH.A0DG	T2	N0	Stage II	Normal	30	0	67.05	19.399	LowRisk
TCGA.A7.A3J1	T1	N0	Stage I	LumA	63	0	11.27	19.4352	LowRisk
TCGA.D8.A1JK	T2	N0	Stage II	Basal	90	0	20.11	19.4423	LowRisk
TCGA.EW.A1P3	T2	N0	Stage II	LumA	48	0	52.92	19.4916	LowRisk
TCGA.A2.A1FX	T3	N2	Stage III	LumB	61	0	60.68	19.4921	LowRisk
TCGA.AR.A0TP	T2	N0	Stage II	Basal	43	0	140.44	19.5014	LowRisk
TCGA.A2.A25E	T2	N2	Stage III	LumB	34	0	105.26	19.5217	LowRisk
TCGA.BH.A18G	T1	N0	Stage I	TNBC	81	0	4.89	19.5664	LowRisk
TCGA.A7.A26H	T1	N1	Stage II	LumA	72	0	23.78	19.5718	LowRisk
TCGA.GM.A2DK	T1	N0	Stage I	LumA	58	0	86.89	19.5975	LowRisk
TCGA.A2.A4S2	T3	N2	Stage III	LumA	62	0	21.12	19.6367	LowRisk
TCGA.E2.A14O	T3	N1	Stage III	LumB	76	0	44.65	19.6681	LowRisk
TCGA.E2.A15O	T1	NA	Stage I	LumB	89	0	50.76	19.6825	LowRisk
TCGA.AO.A0JA	T2	N3	Stage III	LumB	36	0	21.52	19.6893	LowRisk
TCGA.E9.A1RA	T1	N0	Stage I	LumA	48	0	44.97	19.6938	LowRisk
TCGA.LD.A7W5	T2	N3	Stage III	Normal	52	0	7.1	19.7002	LowRisk
TCGA.E2.A572	T2	N2	Stage III	LumA	72	0	39.68	19.7077	LowRisk
TCGA.E2.A1B0	T2	N2	Stage III	Her2	50	0	53.58	19.7525	LowRisk
TCGA.PL.A8LZ	T4	N2	Stage III	Basal	29	0	9.92	19.8036	LowRisk
TCGA.AO.A0JC	T2	N0	Stage II	Basal	64	0	50.82	19.8105	LowRisk
TCGA.BH.A0BO	T1	N0	Stage I	Normal	54	0	72.17	19.8585	LowRisk
TCGA.D8.A141	T1	N1	NA	LumA	40	0	20.57	19.9431	LowRisk
TCGA.A2.A4RW	T2	N3	Stage III	LumA	49	0	7.29	19.9448	LowRisk
TCGA.B6.A1KN	T4	N1	Stage III	Basal	57	0	139.06	19.9771	LowRisk
TCGA.A2.A04R	T1	N0	Stage I	LumB	36	0	121.85	19.9773	LowRisk
TCGA.W8.A86G	T2	N0	Stage II	Normal	66	0	11.4	19.9829	LowRisk
TCGA.EW.A1PF	T1	N0	Stage I	LumA	50	0	14.42	19.9974	LowRisk
TCGA.EW.A1P4	T2	N0	Stage II	TNBC	43	0	29.8	20.013	LowRisk
TCGA.C8.A134	T2	N0	Stage II	TNBC	52	0	12.58	20.0201	LowRisk
TCGA.BH.A208	T2	N1	Stage II	Basal	48	1	57.79	20.0226	LowRisk
TCGA.LQ.A4E4	T3	N1	Stage III	LumB	73	0	27.89	20.0281	LowRisk
TCGA.BH.A0AW	T1	N1	Stage II	Her2	56	0	20.43	20.0446	LowRisk
TCGA.AN.A0XW	T2	N2	Stage III	Her2	36	0	5.58	20.0459	LowRisk
TCGA.E9.A243	T2	N0	Stage II	Basal	52	0	20.11	20.0501	LowRisk
TCGA.D8.A1J8	T2	N1	Stage II	LumB	77	0	14.16	20.0599	LowRisk
TCGA.AO.A0J2	T1	N0	Stage I	TNBC	41	0	32.75	20.069	LowRisk
TCGA.AC.A3W7	T2	N1	Stage II	NA	66	0	15.47	20.0983	LowRisk
TCGA.A2.A259	T1	N0	Stage I	Normal	70	0	52.43	20.2176	LowRisk
TCGA.C8.A278	T2	N2	Stage III	Her2	61	0	9.76	20.2235	LowRisk
TCGA.AN.A049	T2	N0	Stage II	LumB	62	0	0.62	20.226	LowRisk
TCGA.AQ.A04J	T2	N0	Stage II	TNBC	45	0	26.91	20.2458	LowRisk
TCGA.A2.A25F	T2	N0	Stage II	Basal	66	0	10.58	20.3302	LowRisk
TCGA.3C.AALK	T1	N0	Stage I	Normal	52	0	47.57	20.3756	LowRisk
TCGA.A7.A6VY	T2	N1	Stage II	TNBC	48	0	8.74	20.3863	LowRisk
TCGA.A2.A0YD	T3	N0	Stage II	LumA	63	0	25.26	20.5008	LowRisk
TCGA.E2.A1IU	T1	N0	Stage I	LumA	60	0	11.07	20.5268	LowRisk
TCGA.A8.A09D	T2	N1	Stage II	Her2	47	0	50	20.5459	LowRisk
TCGA.B6.A0RU	T1	N0	Stage I	TNBC	40	0	282.69	20.5697	LowRisk
TCGA.AO.A12F	T2	N0	Stage II	TNBC	36	0	60.51	20.5753	LowRisk
TCGA.BH.A0HQ	T2	N0	Stage II	LumA	56	0	36.83	20.6152	LowRisk
TCGA.E9.A1N5	T2	N1	Stage II	LumB	45	0	36.79	20.6252	LowRisk
TCGA.AN.A0XS	T2	N2	Stage III	LumA	63	0	0.33	20.6382	LowRisk
TCGA.BH.A6R8	T2	N0	Stage II	LumA	46	0	9.63	20.6387	LowRisk
TCGA.E2.A10E	T1	N1	Stage II	LumA	64	0	28.42	20.647	LowRisk
TCGA.BH.A0RX	T2	N0	Stage II	TNBC	59	0	5.58	20.6486	LowRisk
TCGA.OL.A6VR	T1	N0	Stage I	LumA	48	0	40.08	20.6589	LowRisk
TCGA.E9.A1NH	T2	N1	Stage II	LumA	71	0	18.92	20.6603	LowRisk
TCGA.A1.A0SP	T2	N0	Stage II	TNBC	40	0	19.19	20.6983	LowRisk
TCGA.AO.A03N	T2	N1	Stage II	Her2	59	0	66.72	20.8009	LowRisk
TCGA.A8.A08I	T2	N0	Stage II	LumB	53	0	11.99	20.8099	LowRisk
TCGA.E2.A56Z	T2	N1	Stage II	LumB	69	0	8.28	20.8357	LowRisk
TCGA.A2.A0T5	T2	N0	Stage II	Normal	39	0	17.44	20.8667	LowRisk
TCGA.A2.A04U	T2	N0	Stage II	TNBC	47	0	87.19	20.8931	LowRisk
TCGA.BH.A0BS	T3	N1	Stage III	LumA	55	0	85.81	20.9376	LowRisk
TCGA.EW.A1PE	T1	N1	Stage II	LumA	56	0	10.51	20.9935	LowRisk
TCGA.A8.A0A2	T2	N0	Stage II	LumA	66	0	19.02	21.0133	LowRisk
TCGA.BH.A0W3	T1	N1	Stage II	LumB	58	0	23.92	21.0508	LowRisk
TCGA.LD.A9QF	T1	N0	Stage I	Normal	73	0	10.61	21.0729	LowRisk
TCGA.A7.A0CJ	T2	N0	Stage II	LumB	57	0	30.58	21.0902	LowRisk
TCGA.LL.A73Z	T1	NA	Stage IV	Basal	55	1	7.46	21.1076	LowRisk
TCGA.AC.A2FO	T2	N1	Stage II	LumA	65	0	74.08	21.1097	LowRisk
TCGA.GM.A3XL	T2	N0	Stage II	TNBC	49	0	69.25	21.1373	LowRisk
TCGA.BH.A1FU	T1	N0	Stage I	Basal	44	1	55.45	21.1505	LowRisk
TCGA.A2.A0ET	T2	N2	Stage III	LumA	58	0	35.02	21.1557	LowRisk
TCGA.A2.A0T6	T3	N0	Stage II	LumA	50	0	18.89	21.1616	LowRisk
TCGA.BH.AB28	T3	N1	Stage III	LumA	53	0	9.43	21.1931	LowRisk
TCGA.AR.A24Q	T3	N0	Stage II	Basal	49	0	104.2	21.2168	LowRisk
TCGA.B6.A1KI	T1	N0	Stage I	LumA	63	0	73.46	21.2954	LowRisk
TCGA.E2.A10A	T3	N0	Stage II	LumB	41	0	40.37	21.3223	LowRisk
TCGA.GM.A2DF	T1	N1	Stage II	TNBC	53	0	70.8	21.3301	LowRisk
TCGA.AC.A6NO	T2	N1	Stage II	LumA	43	0	1.68	21.4014	LowRisk
TCGA.C8.A275	T1	N1	Stage II	Her2	56	0	0.03	21.4081	LowRisk
TCGA.BH.A0GZ	T1	N1	Stage II	LumA	62	0	10.78	21.4625	LowRisk
TCGA.EW.A1PG	T2	N1	Stage II	Normal	53	0	34.53	21.5062	LowRisk
TCGA.A2.A04Y	T2	N1	Stage II	LumB	53	0	36.1	21.6038	LowRisk
TCGA.D8.A1X7	T2	N0	Stage II	LumB	40	0	16.72	21.6336	LowRisk
TCGA.AR.A2LO	T2	N1	Stage II	Normal	46	0	39.36	21.6909	LowRisk
TCGA.AR.A0TW	T3	N1	Stage III	LumB	50	0	98.85	21.6929	LowRisk
TCGA.C8.A1HL	T3	N1	Stage III	LumB	38	0	10.41	21.6951	LowRisk
TCGA.B6.A0I2	T1	N0	Stage I	Basal	45	0	143.27	21.6964	LowRisk
TCGA.AO.A03T	T2	N1	Stage II	Normal	42	0	69.78	21.7072	LowRisk
TCGA.AR.A24V	T2	N1	Stage II	LumA	52	0	105.22	21.8204	LowRisk
TCGA.A2.A4RY	T3	N3	Stage III	Normal	46	0	21.29	21.8401	LowRisk
TCGA.BH.A42V	T1	N1	Stage I	Normal	41	0	20.86	21.8794	LowRisk
TCGA.BH.A0BA	T3	N3	Stage III	LumA	51	0	37.19	21.9029	LowRisk
TCGA.E2.A1B1	T2	N1	Stage II	Normal	45	0	87.16	21.9101	LowRisk
TCGA.D8.A1XQ	T2	N0	Stage II	TNBC	69	0	16.39	21.9354	LowRisk
TCGA.AC.A4ZE	T3	N0	Stage II	NA	63	0	29.24	21.962	LowRisk
TCGA.E2.A14Q	T2	N1	Stage II	LumA	50	0	38.21	21.9865	LowRisk
TCGA.BH.A8FY	T1	N0	Stage I	LumA	87	1	9.69	22.0165	LowRisk
TCGA.C8.A132	T2	N1	Stage II	Normal	56	0	12.58	22.0655	LowRisk
TCGA.AQ.A04L	T2	N0	Stage II	Her2	48	0	129.99	22.0677	LowRisk
TCGA.A8.A08Z	T4	N3	NA	LumB	76	0	39.98	22.0722	LowRisk
TCGA.AO.A0JI	T1	N1	Stage II	LumA	56	0	50.2	22.0814	LowRisk
TCGA.C8.A12U	T2	N1	Stage II	LumB	46	0	12.65	22.0844	LowRisk
TCGA.A7.A0DA	T2	N0	Stage II	TNBC	62	0	35.64	22.1222	LowRisk
TCGA.C8.A12O	T2	N0	Stage II	Basal	50	0	12.65	22.1233	LowRisk
TCGA.D8.A1XW	T2	N0	Stage II	Basal	53	0	43	22.1354	LowRisk
TCGA.A2.A3KD	T3	N1	Stage III	LumA	47	0	39.62	22.1394	LowRisk
TCGA.A8.A08O	T2	N3	Stage IV	LumA	45	0	30.98	22.1589	LowRisk
TCGA.E9.A3QA	T2	N0	Stage II	Basal	33	0	30.16	22.1669	LowRisk
TCGA.A8.A09X	T2	N3	Stage III	TNBC	62	1	13.99	22.1863	LowRisk
TCGA.A2.A0D0	T2	N0	Stage II	TNBC	60	0	67.28	22.1989	LowRisk
TCGA.E9.A5FL	T3	N0	Stage II	TNBC	65	0	0.79	22.2194	LowRisk
TCGA.EW.A1IX	T1	N1	Stage II	LumA	48	0	39.68	22.22	LowRisk
TCGA.B6.A0RS	T2	N0	Stage II	TNBC	38	1	100.62	22.2594	LowRisk
TCGA.C8.A12V	T2	N0	Stage II	TNBC	55	0	12.65	22.27	LowRisk
TCGA.AN.A0AM	T2	N0	Stage II	Her2	56	0	0.16	22.2973	LowRisk
TCGA.D8.A1X9	T2	N1	Stage II	Her2	66	0	23.88	22.3268	LowRisk
TCGA.E2.A9RU	T2	N3	Stage III	Her2	90	0	17.67	22.3534	LowRisk
TCGA.GM.A2DI	T1	N0	Stage I	TNBC	52	0	85.09	22.3702	LowRisk
TCGA.A8.A076	T2	N0	Stage II	Her2	66	0	53.94	22.3788	LowRisk
TCGA.A8.A0A7	T2	N1	Stage II	Her2	57	0	0.99	22.4108	LowRisk
TCGA.AR.A2LE	T1	N0	Stage I	LumA	69	0	166.29	22.5084	LowRisk
TCGA.D8.A27G	T2	N0	Stage II	Her2	75	0	13.44	22.5793	LowRisk
TCGA.A2.A0YM	T2	N0	Stage II	TNBC	67	0	31.7	22.5993	LowRisk
TCGA.EW.A1P5	T2	N1	Stage II	LumB	77	0	23.09	22.607	LowRisk
TCGA.E9.A3X8	T2	N1	Stage II	Normal	48	0	30.42	22.6162	LowRisk
TCGA.AR.A0TV	T2	N0	Stage II	LumB	66	0	75.16	22.6255	LowRisk
TCGA.A8.A07U	T2	N2	Stage III	Basal	66	0	24.97	22.6374	LowRisk
TCGA.A8.A095	T1	N0	Stage I	LumB	45	0	41.95	22.7012	LowRisk
TCGA.E9.A1N4	T2	N2	Stage III	LumB	41	0	32.85	22.7197	LowRisk
TCGA.AN.A0FD	T2	N0	Stage II	LumA	71	0	6.44	22.7293	LowRisk
TCGA.A7.A4SB	T3	N1	Stage III	Normal	56	0	13.73	22.739	LowRisk
TCGA.A8.A08F	T2	N3	Stage III	LumB	59	0	32.98	22.7806	LowRisk
TCGA.BH.A0E6	T1	N0	Stage I	TNBC	69	0	9.63	22.7879	LowRisk
TCGA.AO.A0J6	T2	N0	Stage II	TNBC	61	0	37.45	22.8533	LowRisk
TCGA.E2.A14V	T2	N1	Stage II	Her2	53	0	34.23	22.868	LowRisk
TCGA.AR.A24W	T2	N1	Stage II	Normal	55	0	50.92	22.8904	LowRisk
TCGA.D8.A4Z1	T1	N0	Stage I	Normal	68	0	21.65	22.8914	LowRisk
TCGA.BH.A0DV	T2	N2	Stage III	Normal	54	0	67.81	22.918	LowRisk
TCGA.A8.A08T	T2	N1	Stage IV	LumA	64	1	111.99	22.9284	LowRisk
TCGA.E2.A14N	T2	N1	Stage II	TNBC	37	0	47.11	22.9287	LowRisk
TCGA.C8.A1HK	T2	N1	Stage II	Her2	53	0	12.02	22.9628	LowRisk
TCGA.S3.A6ZH	T3	N3	Stage III	Her2	29	0	21.06	22.981	LowRisk
TCGA.BH.A18F	T2	N0	Stage II	Basal	50	0	32.88	23.0072	LowRisk
TCGA.D8.A27M	T1	N0	Stage I	TNBC	59	0	13.47	23.0344	LowRisk
TCGA.A2.A0SX	T1	N0	Stage I	TNBC	48	0	50.39	23.0872	LowRisk
TCGA.A2.A4S3	T2	N1	Stage II	Her2	59	0	21.88	23.1095	LowRisk
TCGA.GM.A2DH	T1	N0	Stage I	TNBC	58	0	72.04	23.1461	LowRisk
TCGA.A8.A08C	T2	N0	Stage II	LumB	65	0	28.94	23.1481	LowRisk
TCGA.D8.A27I	T1	N2	Stage III	Normal	58	0	14.42	23.1497	LowRisk
TCGA.AR.A24Z	T2	N0	Stage II	LumB	57	0	98.59	23.2048	LowRisk
TCGA.A7.A0DB	T2	N0	Stage II	LumA	56	0	33.08	23.2088	LowRisk
TCGA.D8.A1JL	T2	N0	Stage II	TNBC	72	0	20.07	23.2097	LowRisk
TCGA.A8.A09I	T2	N0	Stage II	LumB	84	0	45.04	23.2343	LowRisk
TCGA.E2.A1II	T1	N0	Stage I	Basal	51	0	33.67	23.2555	LowRisk
TCGA.AR.A0U2	T2	N2	Stage III	Her2	47	1	83.8	23.2615	LowRisk
TCGA.E9.A22E	T2	N2	Stage III	LumB	56	0	41.69	23.272	LowRisk
TCGA.A2.A0EM	T1	N0	Stage I	LumA	73	0	101.64	23.2884	LowRisk
TCGA.E9.A3HO	T2	N0	Stage II	Basal	49	0	38.04	23.3284	LowRisk
TCGA.D8.A27T	T2	N3	Stage III	LumA	53	0	13.07	23.3311	LowRisk
TCGA.AC.A2FB	T2	N0	Stage II	Normal	65	0	40.54	23.3706	LowRisk
TCGA.B6.A0IM	T3	N0	Stage II	LumB	75	1	127.23	23.3741	LowRisk
TCGA.B6.A0WY	T3	N1	Stage III	Normal	40	1	113.7	23.4298	LowRisk
TCGA.A8.A08X	T4	N3	Stage III	Her2	43	0	42.97	23.5529	LowRisk
TCGA.BH.A0HY	T1	N0	Stage I	Her2	60	0	50.76	23.5568	LowRisk
TCGA.A8.A0A9	T2	N0	Stage II	LumB	80	0	27	23.6069	LowRisk
TCGA.E9.A295	T2	N0	Stage II	LumA	71	0	12.32	23.6157	LowRisk
TCGA.BH.A0DQ	T2	N1	Stage II	LumA	42	0	3.22	23.7044	LowRisk
TCGA.D8.A1JD	T2	N1	Stage II	LumB	41	0	18.13	23.7234	LowRisk
TCGA.E2.A14U	T1	N0	Stage I	Normal	74	0	43.3	23.7267	LowRisk
TCGA.BH.A0C0	T1	N1	Stage II	LumB	62	0	41.72	23.7827	LowRisk
TCGA.GM.A5PX	T2	N1	Stage II	LumA	65	0	18.1	23.8125	LowRisk
TCGA.EW.A1PD	T1	N1	Stage II	LumB	61	0	13.93	23.8422	LowRisk
TCGA.E9.A22H	T2	N1	Stage II	LumB	42	0	40.47	23.8638	LowRisk
TCGA.BH.A0BZ	T3	N1	Stage III	Her2	59	0	74.08	23.8665	LowRisk
TCGA.A7.A4SF	T2	N0	Stage II	Her2	54	0	17.9	23.8704	LowRisk
TCGA.LD.A7W6	T2	N1	Stage II	Normal	54	0	13.27	23.8833	LowRisk
TCGA.OL.A66O	T2	N1	Stage II	LumB	39	0	17.35	23.9306	LowRisk
TCGA.AQ.A1H2	T2	N2	Stage III	LumA	84	0	15.6	23.9811	LowRisk
TCGA.E2.A14S	T1	N0	Stage I	LumB	65	0	33.15	23.982	LowRisk
TCGA.D8.A1JU	T1	N0	Stage I	LumA	51	0	14.68	24.056	LowRisk
TCGA.A2.A0T3	T1	N1	Stage I	Basal	37	0	49.8	24.0891	LowRisk
TCGA.AQ.A04H	T2	N2	Stage III	LumB	61	0	24.77	24.1501	LowRisk
TCGA.AC.A3YJ	T2	N0	Stage II	LumA	66	0	24.77	24.1544	LowRisk
TCGA.AN.A0FT	T2	N1	Stage II	Her2	63	0	7.03	24.1905	LowRisk
TCGA.AR.A2LJ	T3	N1	Stage III	Normal	40	0	86.47	24.2292	LowRisk
TCGA.EW.A1OZ	T2	N0	Stage II	Her2	56	0	40.37	24.235	LowRisk
TCGA.E2.A153	T2	N1	Stage II	LumA	51	0	23.23	24.2553	LowRisk
TCGA.AN.A0XN	T2	N2	Stage III	Her2	68	0	0.33	24.2758	LowRisk
TCGA.AO.A1KP	T1	N1	Stage II	LumB	77	0	97.01	24.2989	LowRisk
TCGA.A1.A0SE	T1	N0	Stage I	Normal	56	0	43.4	24.3047	LowRisk
TCGA.E2.A15H	T1	N1	Stage II	LumA	38	0	12.91	24.3668	LowRisk
TCGA.AO.A0J9	T2	N3	Stage III	Basal	61	0	52.99	24.3732	LowRisk
TCGA.BH.A1FC	T1	N1	Stage II	TNBC	78	1	114.06	24.4318	LowRisk
TCGA.EW.A1OY	T2	N0	Stage II	LumB	63	0	29.83	24.4396	LowRisk
TCGA.A7.A0D9	T2	N0	Stage II	LumA	37	0	37.42	24.4572	LowRisk
TCGA.EW.A1J5	T3	N0	Stage II	LumA	59	0	15.67	24.5034	LowRisk
TCGA.AO.A12H	T2	N0	Stage II	LumA	69	0	40.54	24.5714	LowRisk
TCGA.D8.A1XY	T2	N0	Stage II	LumA	74	0	16.52	24.5961	LowRisk
TCGA.BH.A0BD	T1	N1	Stage II	Basal	47	0	18.2	24.6331	LowRisk
TCGA.E2.A152	T1	N0	Stage I	Her2	56	0	69.91	24.6892	LowRisk
TCGA.A1.A0SO	T2	N1	Stage II	TNBC	67	0	27.99	24.6932	LowRisk
TCGA.OL.A66N	T3	N3	Stage III	Normal	59	0	26.02	24.7265	LowRisk
TCGA.C8.A130	T3	N2	Stage III	Her2	52	0	12.16	24.7689	LowRisk
TCGA.A8.A09B	T4	N1	Stage III	LumA	58	0	11.99	24.7756	LowRisk
TCGA.GM.A2DC	T1	N1	Stage II	LumA	57	0	83.28	24.8138	LowRisk
TCGA.AR.A24U	T1	N1	Stage II	Her2	47	0	102.76	24.8541	LowRisk
TCGA.A8.A08A	T1	N0	Stage I	LumA	89	0	0.99	24.9026	LowRisk
TCGA.AR.A0U4	T2	N0	Stage II	TNBC	54	0	107.13	24.9034	LowRisk
TCGA.AO.A12E	T3	N0	Stage II	Normal	51	0	70.37	24.9216	LowRisk
TCGA.LL.A8F5	T2	N0	Stage II	Basal	61	0	19.58	25.009	LowRisk
TCGA.AC.A2FG	T2	N1	Stage II	Normal	79	0	60.87	25.0299	LowRisk
TCGA.A8.A07E	T4	N3	NA	Basal	81	0	19.97	25.0657	LowRisk
TCGA.E9.A3Q9	T3	N3	Stage III	LumA	78	0	32.88	25.0932	LowRisk
TCGA.C8.A1HM	T2	N0	Stage II	LumB	74	0	12.32	25.0941	LowRisk
TCGA.BH.A0HK	T2	N1	Stage II	LumA	81	0	5.85	25.0993	LowRisk
TCGA.B6.A0IK	T4	N1	Stage III	TNBC	63	1	18.76	25.1395	HighRisk
TCGA.BH.A0B8	T1	N0	Stage I	LumA	64	0	51.54	25.1674	HighRisk
TCGA.AN.A0AS	T2	N2	Stage III	LumB	70	0	0.33	25.1793	HighRisk
TCGA.E2.A105	T2	N0	Stage II	LumB	79	0	42.97	25.1824	HighRisk
TCGA.E2.A15D	T2	N0	Stage II	LumA	47	0	17.28	25.1897	HighRisk
TCGA.BH.A1F6	T4	N2	NA	TNBC	51	1	97.4	25.2033	HighRisk
TCGA.BH.A0BV	T2	N1	Stage II	LumA	78	0	49.9	25.2128	HighRisk
TCGA.C8.A1HI	T2	N2	Stage III	Normal	40	0	11.27	25.2395	HighRisk
TCGA.D8.A1JI	T1	N1	Stage II	LumB	54	0	18.96	25.2511	HighRisk
TCGA.A2.A25D	T2	N3	Stage III	Her2	90	0	18.13	25.2912	HighRisk
TCGA.EW.A1IW	T2	N1	Stage II	LumA	80	0	12.19	25.4023	HighRisk
TCGA.E2.A15E	T1	N1	Stage II	Normal	40	0	20.7	25.4038	HighRisk
TCGA.AO.A1KT	T1	N1	Stage II	Her2	78	0	17.77	25.5299	HighRisk
TCGA.E9.A1ND	T2	N1	Stage II	TNBC	75	0	41.59	25.5569	HighRisk
TCGA.BH.A0B3	T2	N1	Stage II	TNBC	53	0	39.52	25.5894	HighRisk
TCGA.A8.A09R	T2	N1	Stage II	LumB	82	0	8.97	25.6096	HighRisk
TCGA.A7.A13D	T2	N0	Stage II	Basal	46	0	31.7	25.6685	HighRisk
TCGA.A2.A0CS	T4	N3	Stage IV	LumA	73	1	77.14	25.679	HighRisk
TCGA.D8.A1JP	T1	N0	Stage I	LumB	73	0	20.99	25.7335	HighRisk
TCGA.BH.A0HI	T1	N0	Stage I	LumA	78	0	20.37	25.7523	HighRisk
TCGA.E2.A1IH	T1	N0	Stage I	LumA	80	0	33.71	25.7606	HighRisk
TCGA.GM.A3XG	T3	N1	Stage III	Normal	46	0	43.69	25.7944	HighRisk
TCGA.EW.A1IY	T1	N0	Stage I	LumB	38	0	8.48	25.8168	HighRisk
TCGA.AN.A0AK	T2	N0	Stage II	LumB	76	0	7.36	25.8837	HighRisk
TCGA.AR.A1AJ	T1	N0	Stage I	Basal	83	0	100.92	25.9901	HighRisk
TCGA.B6.A0RP	T2	N1	NA	LumA	73	1	102.69	26.0152	HighRisk
TCGA.A8.A09K	T1	N1	Stage II	LumB	68	0	29.96	26.0581	HighRisk
TCGA.BH.A201	T1	N0	Stage I	Normal	64	0	28.12	26.0795	HighRisk
TCGA.D8.A1XA	T1	N0	Stage I	LumA	64	0	27.56	26.0934	HighRisk
TCGA.D8.A1XK	T2	N1	Stage II	TNBC	55	0	14.49	26.1205	HighRisk
TCGA.E9.A1NI	T2	N0	Stage II	LumB	51	0	9.86	26.1969	HighRisk
TCGA.B6.A0RV	T3	N2	Stage III	LumA	42	0	169.38	26.2119	HighRisk
TCGA.A2.A4RX	T2	N0	Stage II	Basal	67	0	24.38	26.231	HighRisk
TCGA.JL.A3YX	T2	N0	Stage II	Normal	46	0	11.56	26.2499	HighRisk
TCGA.D8.A146	T2	N0	Stage II	LumA	57	0	21.12	26.2524	HighRisk
TCGA.AR.A1AL	T3	N1	Stage III	Normal	60	0	97.6	26.2632	HighRisk
TCGA.E9.A1QZ	T2	N0	Stage II	Normal	61	0	24.8	26.2924	HighRisk
TCGA.AN.A0FL	T2	N0	Stage II	TNBC	62	0	7.59	26.2944	HighRisk
TCGA.A7.A13F	T3	N1	Stage III	LumB	44	0	25.13	26.2955	HighRisk
TCGA.A8.A09N	T2	N3	Stage III	LumB	57	0	1.02	26.3064	HighRisk
TCGA.C8.A1HE	T2	N0	Stage II	LumA	59	0	12.32	26.3135	HighRisk
TCGA.E2.A1B6	T2	N0	Stage II	TNBC	44	0	28.48	26.3184	HighRisk
TCGA.EW.A6SB	T2	N0	Stage II	NA	62	0	24.97	26.3257	HighRisk
TCGA.D8.A27N	T2	N2	Stage III	Her2	36	0	17.05	26.3333	HighRisk
TCGA.AR.A1AY	T1	N0	Stage I	TNBC	65	0	33.71	26.3372	HighRisk
TCGA.AC.A6IW	T2	N0	Stage II	TNBC	73	0	13.57	26.3619	HighRisk
TCGA.OL.A6VO	T1	N0	Stage I	TNBC	43	0	28.19	26.3875	HighRisk
TCGA.AR.A24P	T1	N0	Stage I	LumA	47	0	2.76	26.4252	HighRisk
TCGA.E9.A5UP	T2	N0	Stage II	LumA	63	0	26.38	26.4711	HighRisk
TCGA.AN.A0FJ	T2	N2	Stage IV	Basal	59	0	7.95	26.4935	HighRisk
TCGA.E2.A10B	T2	N1	Stage II	LumA	67	0	37.48	26.5262	HighRisk
TCGA.E9.A1R3	T2	N3	Stage III	LumA	70	0	2.56	26.5305	HighRisk
TCGA.AC.A5EH	T2	N1	Stage II	NA	76	0	16.79	26.586	HighRisk
TCGA.WT.AB44	T1	N0	Stage I	LumA	77	0	29.01	26.6151	HighRisk
TCGA.BH.A0AV	T1	N0	Stage I	TNBC	52	0	59.79	26.6211	HighRisk
TCGA.E2.A158	T1	N1	Stage II	TNBC	43	0	14.78	26.6786	HighRisk
TCGA.A7.A4SD	T2	N0	Stage II	TNBC	52	0	14.49	26.7037	HighRisk
TCGA.A7.A6VW	T2	N0	Stage II	TNBC	48	0	9.36	26.7484	HighRisk
TCGA.EW.A6S9	T1	N1	Stage II	NA	34	0	15.21	26.7591	HighRisk
TCGA.AC.A5XU	T3	N0	Stage II	NA	74	0	14.95	26.8151	HighRisk
TCGA.E9.A6HE	T3	N3	Stage III	Her2	45	0	27.83	26.8311	HighRisk
TCGA.A7.A3J0	T2	N0	Stage II	LumA	62	0	10.28	26.843	HighRisk
TCGA.XX.A899	T1	N2	Stage III	Normal	46	0	15.34	26.8439	HighRisk
TCGA.BH.A18K	T1	N0	Stage I	Her2	46	1	90.77	26.8592	HighRisk
TCGA.C8.A12X	T2	N1	Stage II	LumB	62	0	12.65	26.9105	HighRisk
TCGA.BH.A0EI	T1	N1	Stage II	LumA	51	0	63.27	26.9332	HighRisk
TCGA.BH.A0H0	T1	N0	Stage I	LumB	69	0	15.14	26.997	HighRisk
TCGA.E2.A15G	T2	N0	Stage II	LumA	76	0	18.2	27.0344	HighRisk
TCGA.LL.A442	T2	N0	Stage II	LumA	56	0	29.2	27.1062	HighRisk
TCGA.BH.A0EE	T3	N0	Stage II	Her2	68	0	30.98	27.1265	HighRisk
TCGA.D8.A1JM	T2	N1	Stage II	Basal	59	0	19.38	27.1308	HighRisk
TCGA.AC.A3TM	T3	N1	Stage III	NA	50	0	25.03	27.1331	HighRisk
TCGA.C8.A1HG	T2	N0	Stage II	LumB	50	0	11.33	27.162	HighRisk
TCGA.BH.A1FB	T2	N1	Stage II	Normal	60	1	120.53	27.1742	HighRisk
TCGA.AR.A0TS	T2	N1	Stage II	TNBC	46	0	84.03	27.1805	HighRisk
TCGA.OL.A97C	T3	N0	Stage II	TNBC	67	0	8.9	27.2271	HighRisk
TCGA.AO.A12G	T2	N0	Stage II	LumA	75	0	53.84	27.2755	HighRisk
TCGA.A8.A07C	T2	N0	Stage II	TNBC	57	0	33.97	27.3288	HighRisk
TCGA.BH.A0B9	T1	N0	Stage I	TNBC	44	0	51.64	27.3673	HighRisk
TCGA.A2.A0YE	T2	N1	Stage II	TNBC	48	0	18.2	27.3691	HighRisk
TCGA.BH.A18I	T1	N1	Stage II	LumA	53	0	35.91	27.3811	HighRisk
TCGA.AR.A1AT	T2	N0	Stage II	Her2	62	1	41.79	27.4089	HighRisk
TCGA.E2.A159	T2	N0	Stage II	TNBC	50	0	25.03	27.4101	HighRisk
TCGA.E2.A1IE	T2	N1	Stage II	LumB	61	0	77.6	27.4551	HighRisk
TCGA.BH.A0HU	T1	N0	Stage I	LumB	52	0	12.88	27.4725	HighRisk
TCGA.C8.A26W	T2	N1	Stage II	Her2	58	0	12.52	27.4956	HighRisk
TCGA.D8.A27H	T2	N0	Stage II	TNBC	72	0	13.04	27.5069	HighRisk
TCGA.AR.A0TU	T2	N0	Stage II	TNBC	35	0	23.29	27.5243	HighRisk
TCGA.A2.A0D1	T2	N0	Stage II	Her2	76	0	34.53	27.5318	HighRisk
TCGA.A8.A0A1	T2	N0	Stage II	LumA	84	0	11.99	27.5863	HighRisk
TCGA.BH.A0B4	T2	N2	Stage III	LumB	65	0	39.13	27.6157	HighRisk
TCGA.A2.A0YF	T1	N0	Stage I	LumB	67	0	50.43	27.6546	HighRisk
TCGA.AQ.A54N	T2	N0	Stage II	TNBC	51	0	2.56	27.6624	HighRisk
TCGA.E9.A1R2	T2	N3	Stage III	LumA	51	0	34.92	27.7618	HighRisk
TCGA.AO.A0J3	T2	N1	Stage II	LumB	67	0	21.39	27.7883	HighRisk
TCGA.A8.A075	T2	N1	Stage II	Her2	42	0	17.02	27.9108	HighRisk
TCGA.E2.A109	T2	N0	Stage II	LumB	64	0	46.55	27.9221	HighRisk
TCGA.C8.A12N	T2	N0	Stage II	LumA	58	0	11.76	27.9935	HighRisk
TCGA.BH.A0W5	T1	N1	Stage II	Normal	77	0	42.31	28.0233	HighRisk
TCGA.AN.A0FX	T2	N0	Stage II	TNBC	52	0	0.33	28.0411	HighRisk
TCGA.AN.A041	T2	N1	Stage II	LumB	29	0	0.23	28.0956	HighRisk
TCGA.B6.A1KF	T2	N1	Stage II	Basal	68	0	101.45	28.1232	HighRisk
TCGA.BH.A0E1	T2	N1	Stage II	Basal	52	0	15.67	28.1554	HighRisk
TCGA.S3.AA0Z	T2	N1	Stage II	Basal	63	0	20.66	28.2005	HighRisk
TCGA.D8.A1XU	T1	N0	Stage I	LumA	56	0	12.98	28.238	HighRisk
TCGA.C8.A135	T2	N1	Stage II	Her2	64	0	12.91	28.263	HighRisk
TCGA.A2.A25C	T2	N1	Stage II	LumB	50	0	17.18	28.3235	HighRisk
TCGA.E9.A247	T1	N0	Stage I	LumB	59	0	38.96	28.3367	HighRisk
TCGA.E2.A15J	T1	N0	Stage I	LumA	51	0	53.88	28.3665	HighRisk
TCGA.HN.A2NL	T2	N0	Stage II	TNBC	56	0	2.6	28.39	HighRisk
TCGA.B6.A0WS	T1	NA	NA	LumA	58	1	97.4	28.4082	HighRisk
TCGA.AC.A3EH	T3	N3	Stage III	NA	79	1	6.47	28.4217	HighRisk
TCGA.S3.AA10	T2	N0	Stage II	TNBC	65	0	19.25	28.4341	HighRisk
TCGA.A8.A07S	T2	N0	Stage II	LumB	73	0	7.98	28.5027	HighRisk
TCGA.D8.A1XM	T1	N0	Stage I	LumA	57	0	17.67	28.5511	HighRisk
TCGA.GM.A2DA	T2	N1	Stage II	Her2	46	1	216.59	28.5613	HighRisk
TCGA.E2.A15C	T1	N0	Stage I	LumA	61	0	22.8	28.5823	HighRisk
TCGA.WT.AB41	T2	N1	Stage II	Normal	55	0	52.92	28.5982	HighRisk
TCGA.A8.A09A	T2	NA	NA	Normal	40	0	9.99	28.6276	HighRisk
TCGA.EW.A1J3	T1	N0	Stage I	LumB	61	0	16.56	28.6534	HighRisk
TCGA.A7.A26I	T2	N0	Stage II	TNBC	65	0	21.71	28.6939	HighRisk
TCGA.4H.AAAK	T2	N2	Stage III	Normal	50	0	11.43	28.7009	HighRisk
TCGA.E9.A2JT	T2	N0	Stage II	Basal	63	0	9.46	28.7407	HighRisk
TCGA.BH.A0DS	T2	N2	Stage III	LumA	71	0	2.56	28.8161	HighRisk
TCGA.A1.A0SD	T2	N0	Stage II	LumA	59	0	14.36	28.8542	HighRisk
TCGA.LL.A6FQ	T2	N2	Stage III	LumA	77	0	2.63	28.9034	HighRisk
TCGA.A8.A06X	T3	N0	Stage II	LumB	77	1	30.98	28.9349	HighRisk
TCGA.E9.A1RG	T1	N2	Stage III	LumB	62	0	21.25	28.9598	HighRisk
TCGA.D8.A143	T2	N0	Stage II	TNBC	51	0	14.16	29.0445	HighRisk
TCGA.AN.A04D	T2	N1	Stage II	TNBC	58	0	1.71	29.1089	HighRisk
TCGA.E2.A1IN	T1	N0	Stage I	LumA	60	0	22.17	29.1108	HighRisk
TCGA.E2.A574	T2	N0	Stage II	TNBC	44	0	38.73	29.1834	HighRisk
TCGA.C8.A273	T2	N1	Stage II	LumB	29	0	16.85	29.1984	HighRisk
TCGA.D8.A1XB	T2	N1	Stage II	LumA	62	0	18.13	29.2046	HighRisk
TCGA.E2.A1LL	T3	N2	Stage III	TNBC	73	0	43	29.2418	HighRisk
TCGA.AR.A0TZ	T2	N2	NA	LumB	43	1	107.16	29.2596	HighRisk
TCGA.A1.A0SH	T2	N0	Stage II	Normal	39	0	47.21	29.2821	HighRisk
TCGA.AR.A1AN	T2	N0	Stage II	LumA	46	0	95.93	29.328	HighRisk
TCGA.A7.A0CH	T2	N0	Stage II	LumA	79	0	35.45	29.3326	HighRisk
TCGA.C8.A26V	T3	N2	Stage III	LumB	47	0	20.24	29.4016	HighRisk
TCGA.A2.A04T	T2	N0	Stage II	TNBC	62	0	73.78	29.4193	HighRisk
TCGA.D8.A1Y2	T2	N0	Stage II	LumB	71	0	14.22	29.439	HighRisk
TCGA.E9.A54X	T1	N0	Stage I	LumB	85	0	23.88	29.4447	HighRisk
TCGA.A7.A6VX	T2	N0	Stage II	LumB	68	0	10.41	29.4932	HighRisk
TCGA.E2.A15L	T2	N0	Stage II	LumB	65	0	20.57	29.4943	HighRisk
TCGA.E2.A1BC	T1	N0	Stage I	LumA	63	0	16.46	29.5089	HighRisk
TCGA.A2.A1FZ	T2	N0	Stage II	LumA	63	0	22.44	29.5328	HighRisk
TCGA.E2.A576	T1	N0	Stage I	LumB	69	0	34.26	29.5373	HighRisk
TCGA.E9.A244	T2	N0	Stage II	Basal	54	0	0.69	29.5552	HighRisk
TCGA.A2.A25B	T2	N1	Stage II	LumB	39	0	42.41	29.6317	HighRisk
TCGA.D8.A1XZ	T1	N2	Stage III	LumB	81	0	15.31	29.716	HighRisk
TCGA.A8.A08G	T2	N0	Stage II	LumB	41	0	19.94	29.806	HighRisk
TCGA.S3.AA11	T2	N0	Stage II	LumA	67	0	13.83	29.8418	HighRisk
TCGA.B6.A0WZ	T2	N1	Stage II	LumB	50	0	206.7	29.9282	HighRisk
TCGA.EW.A1P0	T2	N1	Stage II	LumB	55	0	41.1	29.9519	HighRisk
TCGA.A8.A06P	T1	N2	Stage III	LumA	63	0	13.01	29.9997	HighRisk
TCGA.OL.A6VQ	T2	N0	Stage II	NA	49	0	19.71	30.0268	HighRisk
TCGA.A8.A07I	T2	N2	Stage III	Her2	69	0	13.99	30.0333	HighRisk
TCGA.BH.A0HO	T1	N1	Stage II	LumA	48	0	2.5	30.0721	HighRisk
TCGA.AN.A0AT	T2	N0	Stage II	TNBC	62	0	0.33	30.0796	HighRisk
TCGA.C8.A12Y	T2	N1	Stage II	LumB	44	0	48.49	30.0843	HighRisk
TCGA.AC.A2FE	T3	N3	Stage III	NA	62	1	86.6	30.18	HighRisk
TCGA.C8.A26Z	T2	N0	Stage II	LumB	59	0	15.44	30.1983	HighRisk
TCGA.AQ.A1H3	T2	N3	Stage III	LumA	49	0	32.49	30.2146	HighRisk
TCGA.A8.A084	T2	N1	Stage II	LumB	81	0	15.05	30.2517	HighRisk
TCGA.AC.A3YI	T1	N3	Stage III	Normal	74	0	23.23	30.4222	HighRisk
TCGA.A1.A0SG	T2	N1	Stage II	LumA	61	0	14.26	30.4366	HighRisk
TCGA.EW.A1PA	T2	N1	Stage II	Normal	59	0	18.89	30.4959	HighRisk
TCGA.BH.A0HN	T1	N0	Stage I	LumA	67	0	16.95	30.5474	HighRisk
TCGA.BH.A0DO	T1	N0	Stage I	LumA	78	0	54.01	30.5626	HighRisk
TCGA.AN.A0XT	T2	N2	Stage III	LumA	54	0	0.33	30.5675	HighRisk
TCGA.AR.A24L	T2	N1	Stage II	LumB	26	1	94.15	30.6054	HighRisk
TCGA.5T.A9QA	T2	NA	Stage II	Her2	52	0	9.95	30.6095	HighRisk
TCGA.GI.A2C8	T4	N0	Stage III	LumA	63	0	7.39	30.6189	HighRisk
TCGA.E2.A14W	T2	N0	Stage II	LumB	78	0	32	30.639	HighRisk
TCGA.D8.A1JN	T3	N3	Stage III	LumA	80	0	20.37	30.6493	HighRisk
TCGA.A1.A0SJ	T3	N1	Stage III	Normal	39	0	13.67	30.6535	HighRisk
TCGA.A1.A0SM	T2	N0	Stage II	Her2	77	0	7.95	30.6753	HighRisk
TCGA.E9.A5UO	T2	N0	Stage II	LumB	41	0	25.79	30.6817	HighRisk
TCGA.E9.A1NA	T2	N0	Stage II	LumB	58	0	36.53	30.731	HighRisk
TCGA.PL.A8LX	T4	N1	Stage IV	LumA	35	0	0.16	30.8086	HighRisk
TCGA.GM.A2DM	T2	N0	Stage II	LumA	57	0	105.98	30.843	HighRisk
TCGA.BH.A0HW	T1	N0	Stage I	LumB	62	0	51.28	30.8551	HighRisk
TCGA.AR.A24O	T3	N2	Stage III	LumA	43	0	118.5	30.9676	HighRisk
TCGA.A2.A25A	T2	N0	Stage II	Normal	44	0	107.62	31.1044	HighRisk
TCGA.BH.A1EO	T1	N1	Stage II	LumA	68	1	91.92	31.1432	HighRisk
TCGA.C8.A131	T2	N2	Stage III	TNBC	82	0	13.5	31.2195	HighRisk
TCGA.AC.A2BK	T2	N2	Stage III	TNBC	78	0	73	31.2247	HighRisk
TCGA.E2.A1LG	T2	N0	Stage II	TNBC	50	0	50.03	31.31	HighRisk
TCGA.AN.A0XP	T2	N2	Stage III	LumA	69	0	0.3	31.3217	HighRisk
TCGA.A2.A0T7	T2	N0	Stage II	Normal	51	0	20.73	31.3968	HighRisk
TCGA.AO.A03V	T1	N0	Stage I	LumA	41	0	44.38	31.4268	HighRisk
TCGA.AO.A03U	T1	N0	Stage I	TNBC	31	1	58.9	31.468	HighRisk
TCGA.OL.A5S0	T2	N1	Stage II	Basal	66	0	20.37	31.4775	HighRisk
TCGA.E2.A1LS	T1	N0	Stage I	TNBC	46	0	52.69	31.5002	HighRisk
TCGA.D8.A27R	T2	N3	Stage III	Her2	41	0	10.09	31.5334	HighRisk
TCGA.A8.A091	T2	N0	Stage II	LumA	61	0	32.98	31.629	HighRisk
TCGA.E2.A1L6	T1	N1	Stage II	LumA	44	0	54.14	31.6477	HighRisk
TCGA.AC.A3QQ	T1	N0	Stage I	NA	54	0	24.11	31.7573	HighRisk
TCGA.LL.A5YP	T2	N1	Stage II	Basal	49	0	14.78	31.8038	HighRisk
TCGA.EW.A2FV	T3	N3	Stage III	Normal	39	0	25.89	31.9415	HighRisk
TCGA.E2.A107	T3	N2	Stage III	LumB	54	0	34.4	31.9676	HighRisk
TCGA.EW.A1PB	T3	N1	Stage III	TNBC	70	0	19.97	32.0138	HighRisk
TCGA.AN.A04C	T2	N1	Stage II	Her2	51	0	1.77	32.0485	HighRisk
TCGA.BH.A0H9	T2	N0	Stage II	LumB	69	0	40.97	32.0521	HighRisk
TCGA.AO.A0JM	T2	N1	Stage II	Her2	40	0	71.75	32.0791	HighRisk
TCGA.A2.A0EU	T1	N0	Stage I	LumA	79	0	34.26	32.1117	HighRisk
TCGA.E2.A15S	T2	N1	Stage II	LumB	34	0	14.06	32.1209	HighRisk
TCGA.A8.A09E	T4	N1	Stage III	LumB	73	0	49.01	32.1389	HighRisk
TCGA.A8.A09V	T2	N0	Stage II	LumA	51	0	15.01	32.1654	HighRisk
TCGA.A7.A26J	T2	N0	Stage II	LumA	49	0	20.6	32.1987	HighRisk
TCGA.A8.A099	T4	N3	NA	LumA	76	0	9.99	32.2189	HighRisk
TCGA.BH.A5IZ	T2	N1	Stage II	Basal	51	0	18.63	32.3345	HighRisk
TCGA.BH.A0BJ	T2	N1	Stage II	LumA	41	0	21.68	32.4381	HighRisk
TCGA.EW.A1PC	T3	N0	Stage II	Her2	66	0	6.14	32.4572	HighRisk
TCGA.AN.A0FW	T2	N2	Stage III	LumB	67	0	0.36	32.4916	HighRisk
TCGA.AN.A0FY	T1	N0	Stage I	LumB	55	0	0.33	32.6059	HighRisk
TCGA.B6.A2IU	T2	N0	Stage II	LumA	62	0	170.04	32.6105	HighRisk
TCGA.E2.A1IG	T2	N1	Stage II	LumA	45	0	70.3	32.6624	HighRisk
TCGA.OL.A5RZ	T1	N0	Stage I	Her2	57	0	22.31	32.7334	HighRisk
TCGA.A8.A09Q	T4	N2	Stage III	LumB	83	0	25	33.0609	HighRisk
TCGA.EW.A6SC	T2	N0	Stage II	NA	60	0	31.27	33.0619	HighRisk
TCGA.B6.A0IN	T1	NA	NA	LumB	45	1	84.53	33.0792	HighRisk
TCGA.E9.A22G	T2	N0	Stage II	TNBC	47	0	40.7	33.0914	HighRisk
TCGA.LL.A73Y	T1	N0	Stage I	TNBC	67	0	15.67	33.2052	HighRisk
TCGA.A1.A0SQ	T2	N1	Stage II	LumA	45	0	18.2	33.2748	HighRisk
TCGA.OL.A66P	T2	N0	Stage II	TNBC	75	0	14.06	33.3472	HighRisk
TCGA.D8.A1Y0	T1	N2	Stage III	LumB	65	0	15.51	33.4785	HighRisk
TCGA.AO.A12B	T2	N0	Stage II	LumB	63	0	98.19	33.5386	HighRisk
TCGA.E2.A1L7	T2	N2	Stage III	TNBC	40	0	60.32	33.6327	HighRisk
TCGA.BH.A1ET	T1	N0	Stage I	LumA	55	1	82.79	33.6645	HighRisk
TCGA.BH.A28Q	T2	N1	Stage II	LumA	46	0	36.76	33.7013	HighRisk
TCGA.E2.A14X	T2	N2	Stage III	TNBC	55	0	31.93	33.7079	HighRisk
TCGA.E2.A108	T2	N2	Stage III	Basal	64	0	27.5	33.7366	HighRisk
TCGA.E9.A1RH	T2	N0	Stage II	Her2	63	0	46.55	33.7552	HighRisk
TCGA.A2.A1G4	T3	N1	Stage III	LumB	71	0	19.55	33.7971	HighRisk
TCGA.AR.A2LQ	T3	N0	Stage II	Normal	59	0	40.51	33.7995	HighRisk
TCGA.E9.A1N3	T1	N2	Stage III	LumA	70	0	34.79	33.8366	HighRisk
TCGA.E2.A15T	T2	N0	Stage II	LumB	65	0	51.35	33.8641	HighRisk
TCGA.AO.A03M	T1	N0	Stage I	Basal	29	0	61.3	33.8871	HighRisk
TCGA.AN.A0FS	T1	N0	Stage I	LumA	55	0	6.9	33.8911	HighRisk
TCGA.A2.A0SV	T2	N2	Stage IV	LumB	63	1	27.1	33.934	HighRisk
TCGA.B6.A0WX	T3	N1	Stage III	TNBC	40	1	20.99	33.9385	HighRisk
TCGA.D8.A1JH	T1	N0	Stage I	LumA	56	0	13.99	34.0215	HighRisk
TCGA.E9.A1R7	T2	N0	Stage II	LumB	64	0	48.19	34.0702	HighRisk
TCGA.AO.A0JL	T2	N2	Stage III	TNBC	59	0	55.29	34.0793	HighRisk
TCGA.BH.A0H6	T1	NA	Stage I	LumA	82	0	24.54	34.102	HighRisk
TCGA.D8.A1XR	T2	N1	Stage II	LumB	56	0	15.83	34.1084	HighRisk
TCGA.D8.A1J9	T1	N0	Stage I	Her2	48	0	17.48	34.1118	HighRisk
TCGA.OL.A66J	T1	N0	Stage I	LumA	80	0	65.57	34.1244	HighRisk
TCGA.C8.A12M	T2	N0	Stage II	LumB	70	0	11.76	34.1569	HighRisk
TCGA.A2.A0CT	T2	N0	Stage II	LumB	71	0	75.2	34.2187	HighRisk
TCGA.A8.A09W	T2	N3	Stage III	LumB	70	0	0.99	34.321	HighRisk
TCGA.BH.A0HX	T2	N1	Stage II	LumB	54	0	27.23	34.4596	HighRisk
TCGA.AN.A04A	T2	N2	Stage III	Normal	36	0	2.96	34.4634	HighRisk
TCGA.BH.A1F5	T1	N1	Stage II	LumA	62	1	89.09	34.541	HighRisk
TCGA.BH.A6R9	T2	N0	Stage II	Basal	61	0	5.26	34.5738	HighRisk
TCGA.LL.A9Q3	T3	N3	Stage III	LumA	69	0	17.48	34.6734	HighRisk
TCGA.C8.A3M8	T1	N0	Stage I	LumB	68	0	12.94	34.6858	HighRisk
TCGA.A8.A06R	T2	N1	Stage II	LumB	69	0	17.97	34.6919	HighRisk
TCGA.A2.A1FW	T3	N2	Stage III	LumB	62	0	17.35	34.7539	HighRisk
TCGA.AR.A2LR	T1	N0	Stage I	TNBC	49	0	57.23	34.8046	HighRisk
TCGA.A8.A0A4	T2	N0	Stage II	Normal	73	0	13.01	34.8993	HighRisk
TCGA.A2.A4S0	T2	N0	Stage II	LumA	77	0	23.19	34.9007	HighRisk
TCGA.B6.A1KC	T2	N1	Stage II	LumB	67	0	43.56	34.9422	HighRisk
TCGA.A7.A26E	T3	N1	Stage III	LumA	71	0	31.34	35.0626	HighRisk
TCGA.E9.A1N8	T2	N0	Stage II	Basal	48	0	34.13	35.1045	HighRisk
TCGA.A7.A4SE	T2	N0	Stage II	TNBC	54	0	21.16	35.2146	HighRisk
TCGA.AO.A03P	T2	N1	Stage II	LumB	54	1	95.63	35.2554	HighRisk
TCGA.A7.A5ZV	T2	N0	Stage II	TNBC	62	0	12.09	35.2802	HighRisk
TCGA.E9.A24A	T1	N1	Stage II	LumA	69	0	24.54	35.3278	HighRisk
TCGA.D8.A1XS	T2	N3	Stage III	LumB	48	0	16.29	35.4204	HighRisk
TCGA.A1.A0SI	T2	N1	Stage II	Her2	52	0	20.86	35.4638	HighRisk
TCGA.AR.A1AV	T2	N1	Stage II	LumA	68	0	61.24	35.506	HighRisk
TCGA.AN.A03X	T2	N0	Stage II	LumA	74	0	0.33	35.5131	HighRisk
TCGA.A2.A0YK	T2	N0	Stage II	Normal	61	0	19.32	35.5467	HighRisk
TCGA.AC.A2FK	T2	N3	Stage III	Normal	45	0	87.06	35.6318	HighRisk
TCGA.B6.A0RH	T2	N0	Stage II	Her2	51	1	212.09	35.7735	HighRisk
TCGA.C8.A12Z	T2	N1	Stage II	Her2	45	0	12.55	35.8102	HighRisk
TCGA.AN.A0FZ	T2	N2	Stage III	LumB	45	0	0.33	35.8463	HighRisk
TCGA.A8.A0AB	T2	N0	Stage II	LumB	54	0	17.02	35.8684	HighRisk
TCGA.E2.A106	T1	N1	Stage I	LumA	34	0	83.48	36.0102	HighRisk
TCGA.A2.A1G0	T2	N1	Stage II	LumA	49	0	20.24	36.0312	HighRisk
TCGA.A1.A0SB	T1	N0	Stage I	Basal	70	0	8.51	36.073	HighRisk
TCGA.A7.A56D	T2	N0	Stage II	Her2	84	0	14.72	36.1166	HighRisk
TCGA.OL.A5RW	T1	N1	Stage II	TNBC	40	0	36.33	36.1921	HighRisk
TCGA.A7.A26F	T1	N0	Stage I	TNBC	55	0	24.24	36.2218	HighRisk
TCGA.E2.A15F	T1	N0	Stage I	Normal	64	0	21.62	36.2595	HighRisk
TCGA.D8.A27E	T1	N0	Stage I	LumA	66	0	17.41	36.402	HighRisk
TCGA.C8.A1HJ	T2	N0	Stage II	TNBC	53	0	0.16	36.4927	HighRisk
TCGA.AC.A3OD	T2	N1	Stage II	LumA	68	0	14.82	36.5075	HighRisk
TCGA.A8.A06Y	T2	N0	Stage II	LumA	66	0	25.99	36.649	HighRisk
TCGA.E2.A1IL	T1	N1	Stage II	LumA	78	0	3.88	36.6515	HighRisk
TCGA.A2.A1G1	T2	N1	Stage II	Basal	85	0	19.19	36.7801	HighRisk
TCGA.E2.A15R	T1	N1	Stage II	LumB	64	0	56.9	36.7858	HighRisk
TCGA.E9.A22B	T1	N0	Stage I	Normal	71	0	38.34	36.8304	HighRisk
TCGA.E2.A15P	T1	N0	Stage I	LumA	61	0	19.55	36.9502	HighRisk
TCGA.A8.A09T	T1	N0	NA	LumA	68	0	19.02	37.1964	HighRisk
TCGA.BH.A202	T2	N0	Stage II	Her2	60	0	26.12	37.2217	HighRisk
TCGA.A7.A3IZ	T2	N0	Stage II	LumB	62	0	10.58	37.2534	HighRisk
TCGA.A2.A0T0	T2	N1	Stage II	TNBC	59	0	17.51	37.2789	HighRisk
TCGA.AO.A03O	T2	N0	Stage II	LumB	69	1	81.57	37.2845	HighRisk
TCGA.A7.A13G	T2	N0	Stage II	LumA	79	0	23.59	37.4174	HighRisk
TCGA.D8.A1JE	T1	N1	Stage II	LumB	62	0	18.89	37.47	HighRisk
TCGA.AR.A5QN	T2	N3	Stage III	LumA	68	0	33.28	37.656	HighRisk
TCGA.C8.A1HO	T3	N3	Stage III	LumB	34	0	12.32	37.6971	HighRisk
TCGA.A8.A097	T2	N1	Stage II	Her2	65	0	11.99	37.9429	HighRisk
TCGA.D8.A27F	T2	N0	Stage II	TNBC	40	0	16.03	38.0147	HighRisk
TCGA.A8.A07J	T2	N1	Stage II	LumA	35	0	11.99	38.0213	HighRisk
TCGA.A8.A09C	T2	N0	NA	LumB	69	0	1.02	38.0319	HighRisk
TCGA.AN.A0AL	T4	N0	Stage III	TNBC	41	0	7.46	38.1158	HighRisk
TCGA.E9.A228	T2	N1	Stage II	LumB	58	0	42.21	38.3421	HighRisk
TCGA.A2.A0CY	T2	N1	Stage II	Her2	63	0	54.96	38.4932	HighRisk
TCGA.EW.A1P1	T2	N3	Stage III	TNBC	68	0	39.75	38.5235	HighRisk
TCGA.AN.A03Y	T2	N0	Stage II	LumB	66	0	0.33	38.7527	HighRisk
TCGA.E9.A1R5	T1	N0	Stage I	LumA	63	0	3.02	38.7631	HighRisk
TCGA.AN.A0XV	T2	N2	Stage III	LumA	67	0	5.32	38.9031	HighRisk
TCGA.EW.A1PH	T1	N1	Stage II	TNBC	52	0	19.94	38.9924	HighRisk
TCGA.C8.A274	T2	N0	Stage II	LumB	63	0	16.69	39.0024	HighRisk
TCGA.A2.A1G6	T2	N2	Stage III	TNBC	50	0	16.46	39.0751	HighRisk
TCGA.AC.A23E	T2	N1	Stage II	LumA	50	0	22.93	39.1843	HighRisk
TCGA.A8.A08B	T2	N0	Stage II	Her2	52	0	37.98	39.2295	HighRisk
TCGA.D8.A1JA	T4	NA	NA	Her2	60	0	16.49	39.4692	HighRisk
TCGA.A7.A6VV	T2	N0	Stage II	TNBC	51	0	10.28	39.4764	HighRisk
TCGA.LL.A5YM	T4	NA	Stage III	LumB	88	0	15.31	39.6617	HighRisk
TCGA.A2.A1FV	T3	N0	Stage II	LumA	74	0	23.46	39.7231	HighRisk
TCGA.S3.AA12	T3	N1	Stage III	LumA	82	0	18.86	39.8495	HighRisk
TCGA.BH.A0AY	T2	N0	Stage II	LumB	62	0	25.53	39.8871	HighRisk
TCGA.C8.A12W	T4	N1	Stage III	Her2	49	0	12.65	39.9063	HighRisk
TCGA.BH.A1FE	T2	N1	Stage II	Normal	31	1	74.67	39.9902	HighRisk
TCGA.BH.A0BF	T2	N1	Stage II	Her2	56	1	43.5	40.0632	HighRisk
TCGA.A2.A0D4	T2	N1	Stage II	LumB	37	0	25.2	40.2693	HighRisk
TCGA.C8.A12L	T2	N0	Stage II	Her2	67	0	11.93	40.3354	HighRisk
TCGA.A2.A0YH	T2	N2	Stage III	LumB	53	0	21.65	40.4089	HighRisk
TCGA.AR.A256	T2	N0	Stage II	TNBC	45	1	93.76	40.4371	HighRisk
TCGA.AN.A0XR	T2	N2	Stage III	LumB	55	0	0.33	40.4504	HighRisk
TCGA.EW.A1P6	T2	N1	Stage II	LumA	64	0	18.46	40.7186	HighRisk
TCGA.AN.A0FK	T4	N0	Stage III	LumA	88	0	7	40.93	HighRisk
TCGA.C8.A12P	T2	N1	Stage II	Her2	55	0	11.76	41.0006	HighRisk
TCGA.A8.A08S	T1	N1	Stage II	LumB	71	0	32.98	41.0167	HighRisk
TCGA.A2.A0CR	T3	N0	Stage II	Normal	54	0	107.85	41.0259	HighRisk
TCGA.A2.A0YG	T2	N3	Stage III	Her2	63	0	21.88	41.0505	HighRisk
TCGA.AR.A1AS	T2	N1	Stage II	LumB	54	0	37.78	41.0796	HighRisk
TCGA.LL.A7SZ	T2	N1	Stage II	Her2	49	0	19.51	41.0923	HighRisk
TCGA.AO.A1KO	T3	N0	Stage II	Normal	46	0	20.43	41.1017	HighRisk
TCGA.AO.A03R	T2	N1	Stage II	Basal	57	0	68.69	41.1753	HighRisk
TCGA.C8.A8HR	T3	N2	Stage III	NA	49	0	13.4	41.1857	HighRisk
TCGA.AR.A1AK	T1	N0	Stage I	Normal	70	0	103.78	41.198	HighRisk
TCGA.A8.A093	T2	N0	Stage II	LumA	61	0	17.94	41.2043	HighRisk
TCGA.BH.A1FR	T4	N1	Stage III	LumA	73	1	53.94	41.5068	HighRisk
TCGA.C8.A1HN	T2	N0	Stage II	LumB	56	0	12.94	41.5741	HighRisk
TCGA.D8.A142	T3	N0	Stage II	TNBC	74	0	13.96	41.6053	HighRisk
TCGA.BH.A1FG	T1	NA	Stage I	LumA	88	1	122.73	41.7671	HighRisk
TCGA.AN.A0XL	T2	N0	Stage II	LumA	61	0	5.35	41.7743	HighRisk
TCGA.E9.A1RD	T2	N0	Stage II	LumA	67	0	1.12	41.8795	HighRisk
TCGA.C8.A27A	T2	N1	Stage II	LumB	48	0	24.54	42.1474	HighRisk
TCGA.BH.A0DZ	T2	N1	Stage II	Her2	43	0	16.26	42.1909	HighRisk
TCGA.A2.A04V	T2	N0	Stage II	LumB	39	1	63.07	42.2532	HighRisk
TCGA.D8.A27V	T2	N0	Stage II	LumA	62	0	12.52	42.5588	HighRisk
TCGA.BH.A0HL	T2	N1	Stage II	LumB	56	0	2.37	42.634	HighRisk
TCGA.E2.A156	T1	N0	Stage I	LumA	61	0	23.85	42.6704	HighRisk
TCGA.D8.A1JJ	T2	N0	Stage II	LumB	54	0	20.07	42.7283	HighRisk
TCGA.AO.A0JB	T3	N1	Stage III	Basal	50	0	50.66	42.7382	HighRisk
TCGA.LL.A5YO	T1	N0	Stage I	TNBC	50	0	14.45	42.9834	HighRisk
TCGA.B6.A0I1	T2	N0	Stage II	Basal	73	1	77.56	43.0064	HighRisk
TCGA.AC.A2QH	T3	N0	Stage II	TNBC	58	0	33.02	43.1356	HighRisk
TCGA.A8.A07G	T1	N1	Stage II	LumA	65	0	18.96	43.1452	HighRisk
TCGA.AO.A0J7	T2	N1	Stage II	LumB	71	0	20.3	43.412	HighRisk
TCGA.AC.A7VB	T1	N1	Stage II	NA	51	0	8.21	43.4362	HighRisk
TCGA.A2.A0EX	T3	N0	Stage II	LumA	46	0	24.7	43.672	HighRisk
TCGA.BH.A0BP	T1	N0	Stage I	Normal	76	1	75.43	43.7747	HighRisk
TCGA.S3.AA14	T1	N0	Stage I	LumA	47	0	17.38	43.8196	HighRisk
TCGA.E2.A154	T1	N0	Stage I	LumB	68	0	19.42	43.9613	HighRisk
TCGA.AN.A0G0	T2	N0	Stage II	TNBC	56	0	0.53	44.0544	HighRisk
TCGA.D8.A1Y3	T2	N2	Stage III	Her2	61	0	14.13	44.1441	HighRisk
TCGA.B6.A0WV	T2	N1	Stage II	LumB	67	1	79.4	44.2267	HighRisk
TCGA.B6.A0IE	T3	N1	Stage III	TNBC	38	1	65.47	44.2624	HighRisk
TCGA.AN.A0FV	T2	N0	Stage II	Her2	58	0	0.33	44.305	HighRisk
TCGA.D8.A1XF	T2	N0	Stage II	LumB	45	0	15.21	44.3554	HighRisk
TCGA.E9.A249	T2	N0	Stage II	LumB	45	0	7.13	44.3835	HighRisk
TCGA.AR.A0U3	T2	N1	Stage II	LumB	59	0	134.03	44.403	HighRisk
TCGA.BH.A0B1	T2	N1	Stage II	LumA	66	0	37.71	44.5289	HighRisk
TCGA.B6.A0RL	T2	N0	Stage II	LumB	60	1	81.11	44.6537	HighRisk
TCGA.E2.A1LB	T2	N1	Stage II	Her2	41	0	75.76	44.7027	HighRisk
TCGA.AR.A24N	T1	N0	Stage I	LumB	54	0	99.7	44.9117	HighRisk
TCGA.EW.A2FW	T2	N0	Stage II	LumB	52	0	22.08	44.9801	HighRisk
TCGA.E2.A155	T2	N1	Stage II	LumB	58	0	21.02	45.0399	HighRisk
TCGA.AR.A1AH	T2	N1	Stage II	Basal	51	0	125.07	45.164	HighRisk
TCGA.D8.A145	T1	N1	Stage II	Normal	80	0	13.47	45.2214	HighRisk
TCGA.E2.A150	T2	N0	Stage II	TNBC	48	0	63.57	45.2739	HighRisk
TCGA.D8.A1JF	T1	N2	Stage III	TNBC	79	0	12.02	45.5185	HighRisk
TCGA.BH.A1EN	T2	NA	Stage II	Her2	78	1	69.88	45.622	HighRisk
TCGA.A7.A0DC	T1	N0	Stage I	LumA	63	0	29.76	45.8474	HighRisk
TCGA.BH.A1ES	T2	N1	Stage II	LumA	35	1	113.73	45.967	HighRisk
TCGA.B6.A0I9	T3	NA	Stage IV	Her2	62	1	11.89	46.0445	HighRisk
TCGA.UU.A93S	T4	N3	Stage IV	Her2	63	1	3.81	46.3519	HighRisk
TCGA.A8.A07F	T2	N1	Stage II	LumA	65	0	18.96	46.3539	HighRisk
TCGA.BH.A1EX	T2	N1	Stage II	Her2	67	1	49.54	46.3963	HighRisk
TCGA.UL.AAZ6	T2	N0	Stage II	NA	73	0	17.02	46.4049	HighRisk
TCGA.A8.A07W	T2	NA	Stage IV	LumB	76	0	9.99	46.6028	HighRisk
TCGA.A7.A3RF	T2	N0	Stage II	LumB	79	0	13.4	46.6395	HighRisk
TCGA.A8.A07O	T2	N0	Stage II	TNBC	51	0	9.99	46.6687	HighRisk
TCGA.GM.A2DB	T2	N0	Stage II	TNBC	62	0	79.04	46.7354	HighRisk
TCGA.AN.A0AR	T2	N0	Stage II	TNBC	55	0	0.33	46.7629	HighRisk
TCGA.AR.A0TY	T2	N0	Stage II	LumB	54	1	55.81	47.3531	HighRisk
TCGA.A8.A086	T1	N1	Stage II	LumA	59	0	13.01	47.9354	HighRisk
TCGA.BH.A0E0	T3	N3	Stage III	TNBC	38	0	4.4	47.9998	HighRisk
TCGA.A8.A06O	T1	N0	Stage I	LumB	60	0	13.01	48.0749	HighRisk
TCGA.B6.A400	T2	N2	Stage III	NA	43	0	7.06	48.0822	HighRisk
TCGA.BH.A0C1	T3	N2	Stage III	LumB	61	1	46.35	48.095	HighRisk
TCGA.BH.A0GY	T2	N1	Stage II	Basal	67	0	30.32	48.3863	HighRisk
TCGA.EW.A1J6	T1	N0	Stage I	LumB	70	0	28.75	48.4157	HighRisk
TCGA.BH.A18M	T3	N1	Stage III	Normal	39	1	72.5	48.5257	HighRisk
TCGA.OL.A66K	T2	N0	Stage II	LumA	72	1	41.89	48.6825	HighRisk
TCGA.AN.A0XO	T2	N2	Stage III	LumA	59	0	12.32	49.0208	HighRisk
TCGA.E9.A54Y	T2	N2	Stage III	NA	63	0	23.82	49.165	HighRisk
TCGA.BH.A0H7	T1	N2	Stage III	LumB	65	0	23.06	49.4043	HighRisk
TCGA.D8.A1JS	T1	N0	Stage I	LumA	77	0	12.19	49.4318	HighRisk
TCGA.B6.A0RM	NA	NA	NA	LumB	57	1	77.96	49.4791	HighRisk
TCGA.D8.A1XV	T2	N0	Stage II	LumB	84	0	15.14	49.5341	HighRisk
TCGA.AC.A62X	T2	N0	Stage II	Basal	72	0	13.7	49.8311	HighRisk
TCGA.BH.A1FN	T2	N0	Stage II	Her2	34	1	72.01	49.9677	HighRisk
TCGA.A8.A07L	T3	N1	Stage III	LumB	58	0	32.03	50.2753	HighRisk
TCGA.AC.A8OR	T1	N0	Stage I	LumA	75	0	1.31	50.3568	HighRisk
TCGA.B6.A3ZX	T3	N1	Stage IV	NA	50	1	37.84	50.497	HighRisk
TCGA.E9.A1R6	T2	N0	Stage II	LumB	63	0	11.14	50.7309	HighRisk
TCGA.A8.A082	T2	N1	Stage II	LumB	58	0	18.04	50.7341	HighRisk
TCGA.B6.A0X7	T1	NA	NA	LumA	62	1	58.51	50.7421	HighRisk
TCGA.A8.A07P	T2	N1	Stage II	LumA	68	0	10.97	50.9182	HighRisk
TCGA.BH.A18S	T1	N0	Stage I	LumA	79	1	66	50.9443	HighRisk
TCGA.EW.A1OX	T2	N0	Stage II	LumB	43	0	29.93	51.0903	HighRisk
TCGA.LL.A6FR	T2	N0	Stage II	Basal	50	0	16.06	51.125	HighRisk
TCGA.GM.A3NY	T2	N1	Stage II	LumA	72	0	38.17	51.145	HighRisk
TCGA.HN.A2OB	T2	N1	Stage II	Normal	45	1	62.42	51.1454	HighRisk
TCGA.BH.A1FL	T2	N1	Stage II	LumA	69	1	54.96	51.3795	HighRisk
TCGA.BH.A0E7	T2	N1	Stage II	LumA	79	0	44.78	52.1712	HighRisk
TCGA.E9.A1NE	T2	N1	Stage II	Basal	28	0	35.74	52.2784	HighRisk
TCGA.C8.A138	T2	N2	Stage III	Her2	54	0	12.48	52.3113	HighRisk
TCGA.D8.A27W	T4	N0	Stage III	LumB	55	0	12.25	52.7394	HighRisk
TCGA.A2.A04W	T2	N1	Stage II	Her2	50	0	101.91	53.0149	HighRisk
TCGA.LL.A50Y	T2	N0	Stage II	LumA	84	0	25.03	53.1882	HighRisk
TCGA.B6.A0IC	T2	NA	NA	LumB	90	1	50.66	53.3262	HighRisk
TCGA.A8.A079	T4	N3	Stage III	LumB	69	0	9	53.7866	HighRisk
TCGA.D8.A1X5	T2	N3	Stage III	LumB	81	0	18.56	54.0324	HighRisk
TCGA.BH.A18V	T2	N1	Stage II	TNBC	48	1	51.12	54.1599	HighRisk
TCGA.C8.A3M7	T4	N0	Stage III	TNBC	60	1	33.97	54.6748	HighRisk
TCGA.LL.A740	T1	N0	Stage I	TNBC	61	0	14.49	55.1093	HighRisk
TCGA.B6.A0X5	T2	N1	Stage II	LumB	61	1	68.89	55.3139	HighRisk
TCGA.A2.A3XV	T2	N0	Stage II	Her2	46	0	32.72	55.3522	HighRisk
TCGA.AQ.A7U7	T2	N2	Stage III	Normal	55	1	19.19	55.3809	HighRisk
TCGA.BH.A1FJ	T3	N1	Stage III	LumB	66	1	63.3	55.766	HighRisk
TCGA.E9.A1RE	T2	N2	Stage III	LumB	74	0	46.62	55.8404	HighRisk
TCGA.C8.A137	T2	N1	Stage II	Her2	34	0	12.45	55.9368	HighRisk
TCGA.D8.A1JT	T2	N0	Stage II	LumB	70	0	13.3	56.1024	HighRisk
TCGA.D8.A1XD	T1	N2	Stage III	LumA	36	0	17.15	56.3449	HighRisk
TCGA.BH.A18R	T2	N1	Stage II	Her2	50	1	37.52	56.4339	HighRisk
TCGA.E2.A1B4	T1	N2	Stage III	LumA	74	1	32.98	57.0305	HighRisk
TCGA.A8.A085	T2	N1	Stage II	LumB	44	0	36.93	57.649	HighRisk
TCGA.AO.A1KS	T2	N0	Stage II	LumB	69	0	11.5	57.7925	HighRisk
TCGA.BH.A1FM	T2	N2	Stage III	LumB	44	1	45.6	58.0117	HighRisk
TCGA.D8.A1XG	T4	N1	Stage III	Normal	86	0	14.72	58.1991	HighRisk
TCGA.E9.A1RC	T4	N3	Stage III	LumB	56	0	40.21	58.6224	HighRisk
TCGA.BH.A0EA	T1	N1	Stage II	Normal	72	1	32.56	59.1992	HighRisk
TCGA.A8.A06Q	T3	N2	Stage III	LumB	63	0	1.02	59.5378	HighRisk
TCGA.D8.A1X6	T3	N2	Stage III	LumB	80	0	17.77	60.0986	HighRisk
TCGA.A8.A07R	T2	N3	Stage III	Basal	80	0	8.97	60.2896	HighRisk
TCGA.BH.A18N	T2	N1	Stage II	LumA	88	1	37.71	60.3267	HighRisk
TCGA.E9.A1NF	T2	N0	Stage II	LumB	60	1	35.22	60.3822	HighRisk
TCGA.OL.A5D6	T2	N0	Stage II	TNBC	71	1	36.27	60.401	HighRisk
TCGA.PE.A5DC	T2	N2	Stage III	Basal	72	1	46.98	60.4749	HighRisk
TCGA.BH.A1EW	T2	N1	Stage II	TNBC	38	1	55.65	60.5311	HighRisk
TCGA.BH.A18Q	T2	N1	Stage II	TNBC	56	1	55.58	61.0549	HighRisk
TCGA.E9.A1N6	T2	N1	Stage II	Her2	52	1	22.27	61.3911	HighRisk
TCGA.BH.A204	T2	N1	Stage II	LumB	80	1	83.25	61.604	HighRisk
TCGA.D8.A1XJ	T3	N1	Stage III	Her2	76	0	21.81	62.2085	HighRisk
TCGA.BH.A203	T2	N1	Stage II	Her2	78	1	38.57	63.1176	HighRisk
TCGA.C8.A12Q	T1	N2	Stage III	Her2	78	1	12.65	63.359	HighRisk
TCGA.E9.A1NG	T2	N0	Stage II	LumA	62	1	25.82	63.3978	HighRisk
TCGA.BH.A18U	T2	N2	Stage III	Her2	72	1	51.35	64.0233	HighRisk
TCGA.BH.A1EU	T1	N0	Stage I	LumA	83	1	42.25	64.1665	HighRisk
TCGA.AR.A2LK	T3	N2	Stage III	LumB	62	1	54.17	65.0836	HighRisk
TCGA.A8.A07B	T2	N0	Stage II	Her2	69	0	42.97	65.4158	HighRisk
TCGA.BH.A18P	T1	N0	Stage I	Her2	60	1	30.26	65.5965	HighRisk
TCGA.A8.A06U	T2	N1	Stage II	LumB	80	1	29.01	65.8157	HighRisk
TCGA.A2.A3XS	T1	N2	Stage III	TNBC	62	1	33.9	65.993	HighRisk
TCGA.E2.A2P5	T2	N3	Stage III	LumB	78	1	26.97	66.5771	HighRisk
TCGA.A2.A0CM	T2	N0	Stage II	TNBC	40	1	24.77	67.1048	HighRisk
TCGA.A8.A06Z	T3	N0	Stage II	LumB	84	0	1.02	67.1082	HighRisk
TCGA.BH.A18J	T4	N2	Stage IV	LumB	56	1	20.11	67.2322	HighRisk
TCGA.BH.A1F2	T4	N1	Stage III	LumB	53	1	31.5	67.2401	HighRisk
TCGA.D8.A13Y	T1	N0	Stage I	Her2	52	0	56.77	67.3188	HighRisk
TCGA.A2.A3XX	T2	N0	Stage II	TNBC	49	1	47.27	67.3888	HighRisk
TCGA.A2.A3XY	T2	N1	Stage II	TNBC	49	1	35.91	67.4028	HighRisk
TCGA.BH.A1FH	T2	N1	Stage IV	Normal	47	1	33.97	67.5195	HighRisk
TCGA.BH.A1EY	T2	N0	Stage II	LumA	79	1	17.67	68.7921	HighRisk
TCGA.AO.A0J5	T4	N1	Stage IV	Her2	48	1	26.02	69.8919	HighRisk
TCGA.EW.A6SA	T2	N0	Stage II	NA	59	0	16.75	70.1605	HighRisk
TCGA.AR.A2LH	T3	N3	Stage III	TNBC	55	1	20.24	70.6535	HighRisk
TCGA.A2.A0T2	T3	N3	Stage IV	TNBC	66	1	8.38	70.9207	HighRisk
TCGA.A2.A0YJ	T3	N2	Stage III	Basal	39	0	18.59	71.6568	HighRisk
TCGA.A8.A08J	T4	N3	Stage IV	Her2	52	1	37.02	71.7204	HighRisk
TCGA.AR.A0TR	T2	N1	Stage II	LumA	68	1	5.26	71.86	HighRisk
TCGA.BH.A42T	T2	N0	Stage II	LumB	75	1	10.51	72.0473	HighRisk
TCGA.A2.A0CU	T2	N0	Stage II	LumB	73	1	5.19	72.5412	HighRisk
TCGA.B6.A0I6	T1	N1	Stage II	Basal	49	1	32.56	72.8113	HighRisk
TCGA.D8.A73W	T3	N1	Stage III	LumB	79	1	12.65	73.8182	HighRisk
TCGA.A8.A092	T2	N2	Stage III	Her2	48	0	30.95	74.2477	HighRisk
TCGA.BH.A1FD	T1	N0	Stage I	LumB	68	1	33.15	74.3036	HighRisk
TCGA.AC.A7VC	T3	N0	Stage II	NA	56	0	0.03	74.8072	HighRisk
TCGA.B6.A0X4	T2	N1	Stage II	LumA	62	1	28.25	75.419	HighRisk
TCGA.AC.A2FM	T2	N1	Stage II	LumA	87	1	26.02	76.6876	HighRisk
TCGA.A2.A04P	T2	N3	Stage III	TNBC	36	1	18	77.2923	HighRisk
TCGA.AR.A1AR	T1	N2	Stage III	TNBC	50	1	17.21	77.7169	HighRisk
TCGA.AR.A24K	T2	N0	Stage II	LumB	46	0	50.85	77.7602	HighRisk
TCGA.A8.A08L	T3	N2	Stage III	Her2	89	1	9.99	77.7756	HighRisk
TCGA.E9.A226	T2	N2	Stage III	LumB	45	1	34.43	78.7975	HighRisk
TCGA.A2.A0YT	T4	N2	Stage III	LumB	56	1	23.75	78.8114	HighRisk
TCGA.E2.A14Z	T1	N0	Stage I	Basal	64	1	18.5	79.1142	HighRisk
TCGA.E2.A15M	T2	N0	Stage II	Basal	66	1	11.04	79.4728	HighRisk
TCGA.BH.A1F0	T1	N1	Stage II	Basal	80	1	25.79	79.728	HighRisk
TCGA.B6.A0I8	T1	NA	NA	LumA	46	1	24.61	80.0915	HighRisk
TCGA.EW.A1P8	T2	N3	Stage III	TNBC	58	1	7.85	80.8038	HighRisk
TCGA.E9.A1RB	T2	N0	Stage II	LumB	40	1	32.06	80.8948	HighRisk
TCGA.A2.A3XU	T2	N1	Stage II	TNBC	35	1	29.96	81.2142	HighRisk
TCGA.B6.A0WW	T2	N1	NA	LumB	58	1	18.33	82.9019	HighRisk
TCGA.BH.A18L	T3	N1	Stage III	LumB	50	1	26.64	83.848	HighRisk
TCGA.AC.A62V	T2	N1	Stage IV	LumB	58	1	11.43	84.9511	HighRisk
TCGA.BH.A18T	T2	N0	Stage II	TNBC	70	1	7.36	85.5173	HighRisk
TCGA.D8.A1Y1	T3	N1	Stage III	LumB	80	1	9.92	85.8219	HighRisk
TCGA.D8.A1XC	T4	N1	Stage III	LumA	85	1	12.39	86.3993	HighRisk
TCGA.E9.A2JS	T2	N1	Stage II	LumB	72	1	29.7	87.3851	HighRisk
TCGA.BH.A1F8	T4	N2	Stage III	LumB	90	1	25.07	87.7264	HighRisk
TCGA.AC.A2QJ	T4	N0	Stage III	TNBC	48	1	14.65	88.0036	HighRisk
TCGA.AC.A23H	T2	NA	Stage II	Her2	90	1	5.72	88.3488	HighRisk
TCGA.E2.A1LK	T4	N3	Stage III	TNBC	84	1	8.74	88.3628	HighRisk
TCGA.A1.A0SK	T2	N0	Stage II	TNBC	54	1	31.77	92.3536	HighRisk
TCGA.AQ.A0Y5	T2	N2	Stage III	Her2	70	1	5.65	93.8118	HighRisk
TCGA.A7.A13E	T2	N1	Stage II	Basal	62	1	20.17	95.6725	HighRisk
TCGA.BH.A1EV	T3	N1	Stage III	Her2	45	1	11.99	97.5356	HighRisk
TCGA.B6.A409	T1	N2	Stage III	NA	44	1	18.82	99.7472	HighRisk

## Sheet: s5
SupplementaryTable 5: Relative Fractions of the 15 tumor-infiltrating immune cells of BRCA patients by the CIBERSORT algorithm.
Mixture	B cells naive	Plasma cells	T cells CD8	T cells CD4 memory resting	T cells CD4 memory activated	T cells follicular helper	T cells regulatory (Tregs)	NK cells activated	Monocytes	Macrophages M0	Macrophages M1	Macrophages M2	Dendritic cells resting	Mast cells resting	Neutrophils	P-value	Correlation	RMSE
TCGA.A7.A0CE	0.0639432	0.0375367	0.0848578	0.0158646	0	0.0653144	0.048397	0.00564739	0	0.25775	0.126557	0.142169	0	0.0822329	0	0.04	0.136537	1.03874
TCGA.A7.A0CH	0.0421799	0.0148406	0.0194182	0.217571	0	0.0911322	0	0.0247551	0	0.113491	0.0530418	0.26582	0.0246696	0.0892206	0.0116105	0.06	0.12092	1.03168
TCGA.A7.A0D9	0.0221353	0.127381	0.0226793	0.127266	0	0.0356964	0.0395152	0.0166683	0	0.291854	0.0259754	0.218843	0.0186862	0.0424813	0	0	0.233865	0.998788
TCGA.A7.A0DB	0.0514205	0.00510902	0.0208238	0.0828132	0	0.00716848	0.0158193	0.00311056	0.00158317	0.418538	0.0311518	0.157566	0.0792805	0.124893	0	0.03	0.202125	1.02825
TCGA.A7.A0DC	0.0203687	0.0219936	0	0.206249	0	0	0.00524354	0	0	0.32919	0.00390433	0.259979	0	0.119431	0.00637467	0.06	0.0407981	1.09232
TCGA.A7.A13D	0.0417027	0.00804055	0.00228983	0	0	0.0818142	0.0222725	0	0	0.754749	0.0078104	0.0438653	0	0	0.00394749	0.01	0.389805	0.978338
TCGA.A7.A13E	0.0148715	0.0165084	0.054013	0	0	0.0821314	0.0309313	0.0213668	0	0.570985	0.0335532	0.149086	0	0.0132422	0	0.09	0.0897775	1.12346
TCGA.A7.A13F	0.0530324	0.0103406	0.0417448	0.107417	0	0.055996	0.0157602	0.00293621	0.0649353	0.118876	0.0341349	0.295202	0.0851892	0.0783861	0.0237781	0.07	0.167467	1.01381
TCGA.A7.A13G	0.00606802	0.0475715	0.0650195	0.289555	0.00858348	0.0214712	0	0	0.0457185	0.0173902	0.0282175	0.20885	0.124234	0.0593955	0	0.03	0.154059	1.01514
TCGA.A7.A26E	0.0920007	0.0120837	0.0438199	0.218824	0	0.0589146	0	0	0.192089	0	0.0714542	0.201097	0	0.105866	0	0.01	0.154071	1.01582
TCGA.A7.A26F	0.136142	0.0388711	0.0818801	0.29611	0.00708852	0	0.0064783	0	0.0172859	0.0453819	0.0187015	0.169888	0	0	0.0160361	0.01	0.233903	0.988679
TCGA.A7.A26I	0.0902019	0.0253229	0.0299459	0.101206	0.025085	0.0366863	0.0389399	0	0	0.201271	0.0292921	0.378691	0	0.0227075	0.00164825	0	0.193233	1.01532
TCGA.A7.A26J	0.0944502	0.0103861	0	0.155923	0	0.0622848	0	0.0167186	0.0595031	0.142647	0.0409063	0.31206	0.0120022	0.0655982	0.00602856	0.04	0.169511	1.01483
TCGA.AC.A23H	0.0764293	0.0145063	0.0318912	0	0.00534555	0.0523689	0.0653272	0	0	0.529674	0.0523557	0.106375	0	0.0340978	0	0.06	0.21361	1.03715
TCGA.AC.A2FB	0.0870575	0.00498782	0.158664	0.276339	0.0804611	0.0641945	0	0	0.0209738	0.0273459	0.106778	0.0387385	0.010411	0.113527	0	0	0.178261	1.02284
TCGA.AC.A2FF	0.0733154	0.0615197	0.100016	0.20864	0.0206875	0.0610813	0.0156522	0	0	0.00650071	0.0775649	0.132841	0.0879251	0.130836	0	0.03	0.196003	1.00031
TCGA.AC.A2FM	0.0760099	0.0168399	0.101245	0.205609	0	0.0654585	0.0144325	0.0184487	0.00502918	0	0.113977	0.206185	0.00605524	0.155518	0.00765782	0.07	0.14063	1.02728
TCGA.AC.A2QH	0	0.00278924	0	0.17754	0	0.0249167	0.0239982	0.0491999	0	0.603055	0.00815989	0.0690377	0	0.0116125	0.0296904	0.03	0.160635	1.08878
TCGA.AC.A3OD	0.073313	0.0078359	0.038028	0.298401	0.0136261	0.0148169	0	0	0	0.108027	0.0770776	0.196222	0.0924848	0.0504264	0	0.02	0.160747	1.01679
TCGA.BH.A0AU	0.0460831	0.0253066	0.0548879	0.20614	0.0177725	0.0515199	0.0682182	0	0.0152438	0.176518	0.13305	0.0932872	0.0189473	0.0739147	0	0.02	0.107636	1.0445
TCGA.BH.A0AY	0.0449387	0.000759851	0.144505	0.133322	0.00675831	0.0201483	0.0314994	0.0217471	0	0.0813226	0.086527	0.172056	0.0412073	0.215208	0	0.01	0.430426	0.902213
TCGA.BH.A0AZ	0.195108	0.0666291	0.0724255	0.166427	0	0.02681	0.0330587	0.0053649	0	0.165089	0.0622735	0.124882	0.0176254	0.0636973	0.00060935	0.01	0.331453	0.948135
TCGA.BH.A0B3	0.0060742	0.0736647	0.102866	0.0465967	0.0769275	0.0622886	0.0936055	0	0.0148225	0.1259	0.140979	0.120234	0.0474754	0.0296648	0.00115085	0.01	0.123338	1.03677
TCGA.BH.A0B5	0.0691821	0.0119484	0.0845373	0.160085	0	0.0779786	0.022496	0.0287138	0	0.129544	0.0818803	0.138674	0.0182189	0.150803	0	0	0.191774	1.00313
TCGA.BH.A0B7	0.114656	0.0236897	0.129994	0.157554	0.0287724	0.0497702	0.0322757	0.00786934	0	0.234774	0.0772387	0.0733368	0.00960951	0.0493981	0	0.06	0.190838	1.01057
TCGA.BH.A0B8	0.0730851	0.0122278	0.0742748	0.256884	0.00491392	0.03834	0.0113052	0	0.0662634	0	0.0804337	0.198941	0.049198	0.131509	0.0013743	0.02	0.137	1.02224
TCGA.BH.A0BA	0.219734	0.180375	0.0722264	0.183456	0	0.0267106	0.0400593	0.0299174	0.0145697	0.0263019	0.0536533	0.0242542	0.0213261	0.107416	0	0.01	0.440599	0.900606
TCGA.BH.A0BC	0.0460417	0.00690144	0.072513	0.134029	0.0130416	0.0433039	0.0724989	0	0	0.303026	0.125195	0.142174	0.00365205	0.0376243	0	0.02	0.0940348	1.06452
TCGA.BH.A0BJ	0.1164	0.0774206	0.0806454	0.199781	0.000404502	0.018327	0.0301671	0	0	0.158706	0.0677007	0.119782	0.0183453	0.112321	0	0.01	0.277312	0.969365
TCGA.BH.A0BM	0.132502	0.00328757	0.0718112	0.232935	0	0.142784	0.00707415	0.0519112	0	0.0217065	0.0724314	0.139759	0.00394927	0.063392	0	0.02	0.145565	1.03676
TCGA.BH.A0BQ	0.126545	0.0121379	0.109933	0.196798	0	0.036845	0.069394	0	0.0175619	0.171193	0.0984497	0.0472151	0.011503	0.100226	0	0.03	0.178133	1.01457
TCGA.BH.A0BS	0.0699312	0.00649758	0.036452	0.0879682	0	0.0631638	0	0.0235905	0.13265	0.0701538	0.0833904	0.32409	0.0296846	0.0502926	0.00850837	0.06	0.0809136	1.05011
TCGA.BH.A0BT	0.0619709	0	0.0924608	0.160649	0	0.133686	0.0997694	0.0328311	0	0.101672	0.121685	0.0716661	0.032664	0.0909458	0	0.03	0.17979	1.02028
TCGA.BH.A0BV	0.0337819	0.00811072	0.122694	0.230675	0.0106507	0.0313245	0.0341661	0	0	0.212246	0.107488	0.16871	0.00288932	0.0224312	0.00511871	0.04	0.0777414	1.06647
TCGA.BH.A0BW	0.047767	0.00388885	0.00469584	0.196163	0.0552861	0.0569328	0.0270765	0.00139383	0.0110615	0.0850238	0.215385	0.157679	0	0.0550749	0.000853157	0.02	0.133357	1.04769
TCGA.BH.A0BZ	0.0168549	0.0176693	0.172264	0.186797	0.0248594	0.0756861	0.0773392	0.000924068	0.00116309	0.0626037	0.132875	0.124946	0.0321845	0.0564081	0.00461329	0	0.0985416	1.05915
TCGA.BH.A0C0	0.0261862	0.00769689	0.129405	0.141491	0.0525918	0.0887606	0.0444202	0.0185166	0.01233	0.0712387	0.103403	0.148986	0.0376283	0.0953942	0.00478864	0.07	0.0611416	1.0585
TCGA.BH.A0C3	0.0918693	0.0104216	0.0584674	0.273158	0.0184004	0.019169	0.0251848	0.00841731	0.00708233	0.0305724	0.105519	0.110361	0.0782647	0.157002	0	0.01	0.179575	1.00818
TCGA.BH.A0DD	0.0552783	0.0123185	0.0876393	0.234349	0.0140078	0.103845	0.0332936	0	0	0.178347	0.0964512	0.14004	0	0.0226439	0.00334556	0.04	0.126493	1.04312
TCGA.BH.A0DG	0.123667	0.0370192	0.0636651	0.148069	0.0370807	0.061519	0.0432842	0	0	0.120342	0.109017	0.143617	0.0338808	0.0617391	0	0.04	0.223514	0.991128
TCGA.BH.A0DH	0.201524	0.190762	0.0391766	0.103397	0	0	0.0709022	0.00383094	0.00887148	0.190974	0.0569462	0.0737516	0	0.059863	0	0.08	0.438554	0.901068
TCGA.BH.A0DK	0.0762626	0.0128632	0.19783	0.23562	0.00684316	0.0491825	0.0665473	0.0270469	0	0.106647	0.0786239	0.0957228	0.00132624	0.0449974	0.000486294	0.04	0.10917	1.05774
TCGA.BH.A0DL	0.0179402	0.00192343	0.075785	0.0618966	0.0597779	0.107023	0.0230778	0.0100239	0.00638341	0.213217	0.163015	0.148486	0.1048	0.00665075	0	0.05	0.0287573	1.08972
TCGA.BH.A0DO	0.309775	0.0745491	0.0231326	0.00211159	0	0.0590713	0.0183011	0	0	0.321677	0.0347095	0.0843461	0	0.057035	0	0.07	0.399024	0.924761
TCGA.BH.A0DP	0.09491	0.00344147	0.248533	0.0777539	0	0.094389	0.0178628	0.00133861	0.0157707	0.0893366	0.124986	0.145999	0.00243006	0.0768661	0.00638239	0.05	0.142768	1.0333
TCGA.BH.A0DQ	0.092883	0.038012	0.0309659	0.0989563	0.00276807	0.038047	0.0171065	0.00491196	0	0.309563	0.0810443	0.115687	0.0157127	0.130526	0	0.02	0.194724	1.01036
TCGA.BH.A0DT	0.109707	0.0134093	0.0857107	0.192817	0	0.0995714	0.0281203	0.00334486	0.00276975	0.0970626	0.121494	0.0603223	0.117155	0.0630576	0	0.04	0.173722	1.01487
TCGA.BH.A0DV	0.12143	0.0291751	0.0884036	0.148157	0	0.0512998	0	0.052038	0	0.0396723	0.023046	0.253093	0.0068901	0.183492	0.00330199	0.02	0.221703	0.990382
TCGA.BH.A0DZ	0.0256599	0.026216	0.0460636	0.194925	0.00836205	0.0498027	0.049534	0.0211999	0	0.217738	0.119832	0.207484	0.0115548	0.0162094	0	0.05	0.125233	1.0445
TCGA.BH.A0E0	0.0320046	0	0.0539358	0.0906867	0	0.094564	0.148155	0.0146443	0.0083945	0	0	0.069579	0.362874	0.0321244	0	0.03	0.181633	1.01561
TCGA.BH.A0E1	0.100825	0.0444055	0	0.07607	0	0.0297985	0.000748031	0	0	0.468345	0.0333242	0.108371	0.00413327	0.103576	0	0.02	0.52514	0.850988
TCGA.BH.A0H5	0.0944038	0.0715463	0.249242	0.13636	0.0482364	0.0538743	0.037435	0.01633	0.0181174	0.0737295	0.0771265	0.0520366	0.0184685	0.0530936	0	0.06	0.245911	0.990629
TCGA.BH.A0H7	0.112245	0.00432435	0.114036	0.0575574	0	0.071559	0.0459013	0.00394684	0	0.272296	0.105132	0.136354	0	0.0748045	0	0.05	0.20832	1.00543
TCGA.BH.A0H9	0.0596452	0.00360271	0.0836583	0.18691	0.00803322	0.0500261	0.0100722	0.0129112	0	0.22136	0.0675678	0.212244	0.0102672	0.0714262	0.00227611	0.03	0.136843	1.03287
TCGA.BH.A0HA	0.0779899	0.00820972	0.0651927	0.154308	0	0.0928591	0.0730609	0.0572088	0.00266155	0.0478581	0.156088	0.0631477	0.0363491	0.157403	0.00353853	0.05	0.153401	1.02984
TCGA.BH.A0HK	0.0961795	0.101858	0.0887711	0.241975	0	0.0395804	0.027761	0.00716772	0.0759415	0	0.0916736	0.149784	0.0382928	0.0310554	0	0	0.262891	0.97789
TCGA.BH.A18J	0.0215932	0	0.0134489	0.0905551	0	0.0279357	0.0432145	0.00707593	0	0.422679	0.0505385	0.269663	0	0.0208873	0.0324081	0	0.374102	0.945072
TCGA.BH.A18K	0.0695841	0.00982339	0.047899	0.0631118	0	0.0790342	0.0391544	0	0	0.290312	0.0841011	0.152897	0.0717932	0.0633568	0.0186743	0.04	0.226521	0.997586
TCGA.BH.A18L	0.0735677	0.0102495	0.104948	0.171648	0.00718524	0.0609706	0.0177197	0.0174896	0.0425953	0.0314171	0.135469	0.295364	0	0.031376	0	0.06	0.104972	1.047
TCGA.BH.A18M	0.215721	0.0245092	0.112765	0.213554	0	0.0276155	0.00572288	0.00213408	0.0250811	0.0224829	0.0884628	0.0938036	0.0234932	0.144655	0	0.05	0.298867	0.962812
TCGA.BH.A18N	0	0	0	0.210602	0	0.0239224	0.0452959	0.0390713	0.0139927	0.166855	0.0288767	0.424185	0	0.032401	0.00843685	0.03	0.154691	1.03772
TCGA.BH.A18P	0.0640937	0.0122711	0.0547442	0.141956	0.0256159	0.0702508	0.0460593	0.0157006	0	0.187468	0.131201	0.146542	0.0195317	0.0645345	0.00468646	0.01	0.268832	0.975638
TCGA.BH.A18Q	0.0962052	0.0169354	0.199347	0.0451956	0.0082318	0.103674	0.0543329	0.00882314	0.033382	0.012024	0.160609	0.136443	0.0291592	0.053654	0	0.08	0.174818	1.02282
TCGA.BH.A18R	0.106288	0.0295568	0.0772177	0.215508	0.0676368	0.0619909	0.00621387	0.00544199	0.00695099	0.0345374	0.114523	0.129586	0.0918958	0.0526526	0	0.05	0.176206	1.01001
TCGA.BH.A18S	0.0608578	0.00414922	0.0824987	0.0678672	0	0.0413765	0.0170254	0	0.0422003	0.166813	0.0281017	0.430095	0	0.042234	0	0.01	0.101376	1.05864
TCGA.BH.A18U	0.0387678	0.0101015	0.0536092	0.140336	0.0273727	0.0913356	0.0323438	0	0	0.1868	0.132529	0.210742	0.00290727	0.0160997	0.0234251	0.05	0.0570688	1.07231
TCGA.BH.A18V	0.0179193	0.00247397	0.0485173	0.111084	0.0063121	0.0435025	0.0471563	0.015497	0	0.419207	0.1001	0.148939	0	0.0392917	0	0.54	0.0691903	1.0951
TCGA.BH.A1EN	0.0378475	0	0.0783663	0.128366	0.0374852	0	0.00281913	0	0.0151177	0.0114981	0.00534066	0.362982	0.0398318	0.228214	0	0	-0.0240029	1.08804
TCGA.BH.A1EO	0.0300914	0.00201232	0.00924907	0.204505	0.00494436	0.0390858	0.0283479	0	0	0.205692	0.0883139	0.195158	0.0258598	0.154433	0.0059055	0.01	0.305885	0.958804
TCGA.BH.A1ET	0.0850982	0.0151342	0.0947469	0.286279	0.00298716	0.0281248	0	0.0138611	0.0806735	0	0.0806491	0.177873	0.037224	0.0947402	0.0026085	0	0.141676	1.02317
TCGA.BH.A1EU	0.111752	0	0.0512899	0.232017	0.0211488	0.0663945	0.0173376	0	0	0.105848	0.0924663	0.159674	0.0300391	0.0607208	0.00385725	0.09	0.21163	0.997444
TCGA.BH.A1EV	0.0629471	0.0212147	0.0264024	0.0382141	0	0.0110277	0.0228006	0.00383431	0	0.401125	0.0648895	0.309197	0	0.0175791	0.000844061	0.04	0.120773	1.08409
TCGA.BH.A1EW	0.0599705	0.0197732	0.0878346	0.298278	0.0907468	0	0.00101492	0	0.0335932	0.00616136	0.130331	0.0858766	0.014496	0.11664	0.00916619	0.07	0.128922	1.03519
TCGA.BH.A1F0	0.0567105	0.0137538	0.0126379	0.281351	0.0206608	0.090721	0.0201774	0	0.0138797	0.0580527	0.142103	0.208727	0.00486374	0.0449364	0.0052258	0.05	0.0774714	1.05954
TCGA.BH.A1F2	0.01463	0.00127581	0.0097664	0.0287104	0	0.0512971	0	0.0196224	0	0.313324	0.0306812	0.355597	0	0.0856562	0.0128799	0.06	0.284227	0.988566
TCGA.BH.A1F6	0.0482731	0.0163158	0.106651	0.129876	0.0337225	0.0604928	0.0154297	0.0207884	0.00135947	0.263184	0.0884607	0.200293	0	0.0104189	0.00473415	0.1	0.0891804	1.06069
TCGA.BH.A1F8	0.0464023	0.0362932	0.10545	0.154192	0.00522044	0.103947	0	0.0113132	0	0.0417751	0.0191497	0.269918	0.0207737	0.0432077	0.0215967	0.02	0.114225	1.03413
TCGA.BH.A1FB	0.116489	0	0.0992587	0.244348	0.0432731	0.0913086	0.0227747	0	0.0023462	0.0196745	0.0792245	0.096946	0.0621627	0.119209	0.00298402	0.07	0.158525	1.02145
TCGA.BH.A1FC	0	0.0533096	0.151234	0.140692	0.158404	0.105545	0.039375	0	0.0215384	0.0390751	0.0854804	0.0360878	0.0288869	0	0	0.04	0.150664	1.03247
TCGA.BH.A1FD	0.00125475	0.00280497	0.0369664	0.166141	0.0363513	0.0598028	0.038983	0	0	0.312571	0.0689626	0.252048	0	0.0053437	0.013091	0.04	0.17711	1.03304
TCGA.BH.A1FE	0.167913	0.0215278	0.086651	0.282303	0.0218571	0.0609218	0.0298195	0	0.0141856	0.0562194	0.122202	0.0176194	0.0109105	0.0969576	0	0.01	0.272708	0.979824
TCGA.BH.A1FG	0.0650407	0.00764406	0.100967	0.115852	0.00223049	0.0355268	0.0150241	0	0.0808486	0.028153	0.119779	0.206303	0.0169663	0.190511	0	0.07	0.120834	1.03036
TCGA.BH.A1FH	0.217051	0.133528	0.0734111	0.0974189	0	0.00930891	0.0110705	0.0265137	0.00790444	0	0.0415095	0.210227	0.0308381	0.138526	0.00269298	0.04	0.441057	0.896858
TCGA.BH.A1FJ	0.042771	0.0158659	0.0369416	0.0516963	0	0.0662868	0.0172031	0.0223399	0.0418451	0.19933	0.00550911	0.232785	0.0216348	0.0744063	0.00553666	0.02	0.106165	1.04391
TCGA.BH.A1FM	0.0318862	0.00692898	0.0110007	0.0523092	0.000885236	0.0239743	0.00657667	0	0	0.331906	0.0500396	0.30953	0	0.0520317	0.056253	0.04	0.275999	0.990999
TCGA.BH.A1FN	0.0513751	0.00814002	0.0109202	0.07786	0.00871823	0.0865617	0.0133897	0	0	0.476788	0.0952284	0.108987	0	0.00983834	0.0292006	0.08	0.306798	0.981025
TCGA.BH.A1FR	0.0590957	0	0.111305	0.135345	0	0.0472334	0.0258351	0.00672545	0	0.277695	0.116319	0.198979	0	0.0192219	0.00224572	0.04	0.117758	1.05435
TCGA.BH.A1FU	0.116217	0.0423929	0.067324	0.196919	0.00424424	0.0712371	0.0297389	0.0244416	0	0.183336	0.0683893	0.0812289	0.0124291	0.0828741	0	0.05	0.217083	0.995784
TCGA.BH.A203	0.0290561	0.00709446	0.0987293	0.210455	0.0433892	0.0899057	0.0237246	0	0	0.120389	0.117844	0.176208	0.0280673	0.0328074	0	0.07	0.0498502	1.0718
TCGA.BH.A204	0.000516838	0	0.075756	0.183664	5.62952e-05	0.0151257	0.00130769	0	0.0231417	0.0490227	0.0028986	0.43094	0	0.207191	0.00889202	0.01	0.0684893	1.06515
TCGA.BH.A208	0.16153	0.130883	0.0877382	0.127196	0.0100286	0.0350476	0.0240296	0.0239494	0.00214501	0.0493235	0.0556367	0.18095	0.0163837	0.095017	0.000141809	0.04	0.380774	0.925541
TCGA.BH.A209	0.095488	0	0.163288	0.152995	0.0713898	0.0592585	0.021281	0	0.0049982	0.072007	0.134845	0.112104	0.0222807	0.0838109	0.00445403	0.01	0.120435	1.03894
TCGA.E2.A153	0.00744692	0.000490278	0.00397137	0.0518624	0	0.028413	0.0238627	0.0112314	0	0.398082	0.0123183	0.281689	0	0.12447	0.0146001	0.07	0.431766	0.908819
TCGA.E2.A158	0.0721175	0.0332439	0.129827	0.075594	0	0.190206	0	0.000781355	0.0119995	0.0845977	0.171522	0.10467	0.0857999	0.0228473	0	0.07	0.158155	1.02979
TCGA.E2.A15I	0.162972	0.00809738	0.187541	0.18258	0.0107991	0.0628089	0.00393033	0	0	0.102358	0.0951909	0.118075	0.0132052	0.0384	0	0.01	0.291267	0.968718
TCGA.E2.A15K	0.121069	0.0203643	0.143888	0.150958	0.0265332	0.0845783	0.0886108	0	0.0124574	0.113272	0.0634356	0.116312	0.0146703	0.0438515	0	0.07	0.189804	1.01132
TCGA.E2.A15M	0.0951094	0.0202561	0.0452013	0.317626	0.021649	0.0467611	0.0296915	0	0.00628771	0.0517071	0.11365	0.130874	0.0302045	0.0369389	0	0	0.161551	1.0248
TCGA.E2.A1BC	0.152699	0.00832225	0.0308279	0.232818	0	0.0818366	0	0.075399	0	0.036763	0.0718771	0.13343	0.0780983	0	0	0.03	0.188058	1.00958
TCGA.E2.A1IG	0.0472702	0.0115996	0.0661606	0.200645	0	0.0531246	0.0360881	0.0254056	0.0470933	0.14898	0.0602231	0.259948	0.000873291	0.039742	0.00284643	0.03	0.149005	1.02533
TCGA.E2.A1L7	0.0689298	0.0377839	0.160289	0.204915	0.0398092	0.0469203	0.0638007	0.000430091	0	0.0908662	0.0941968	0.142218	0.0324782	0.017363	0	0.04	0.165029	1.02366
TCGA.E2.A1LB	0.0956031	0.110741	0.0303356	0.0881011	0	0.0743675	0.0428079	0.0264535	0.0680105	0.0575192	0.0638284	0.251829	0.0109338	0.0642688	0	0.06	0.3074	0.955697
TCGA.E2.A1LH	0.0328334	0.045145	0.214825	0.00232616	0.0111372	0.133132	0.0892621	0.0523001	0.00304811	0.132271	0.126434	0.0902382	0.0162211	0.0335675	0.00140838	0.02	0.131191	1.0441
TCGA.E2.A1LS	0.115443	0.00154794	0.0892348	0.188739	0.00696456	0.110449	0	0	0.0499693	0	0.154986	0.179034	0	0	0	0.04	0.0346557	1.08928
TCGA.E9.A1N4	0.0399755	0	0	0.182764	0	0	0.0293831	0	0	0.39216	0.114856	0.0875216	0.00610217	0.106252	0	0.01	0.596814	0.808753
TCGA.E9.A1N5	0.00283901	0.00250989	0.192428	0.105605	0	0.0232968	0.063661	0.0444867	0	0.185701	0.0931027	0.141704	0.0118064	0.132859	0	0.04	0.505545	0.864486
TCGA.E9.A1N6	0.0121573	0.00672548	0.0232019	0.122076	0	0.0670666	0.0145184	0.0104315	0	0.364726	0.0557652	0.299066	0.00309693	0.021168	0	0.03	0.460444	0.88998
TCGA.E9.A1N9	0.0732406	0.00950304	0.119715	0.340768	0.000729826	0.0349929	0.0464721	0.00706621	0.0023607	0.0924224	0.10069	0.110556	0.0123979	0.0314749	0	0	0.106597	1.05887
TCGA.E9.A1NA	0.0181926	0.00169802	0.0361458	0.0999803	0	0.0229837	0.0513333	0.0323445	0.119454	0.185352	0.0574671	0.235976	0	0.0638425	0.0204743	0.02	0.0781757	1.05542
TCGA.E9.A1ND	0.0139242	0.00967684	0.104683	0.125901	0.076114	0.115382	0.0177685	0.0275041	0.0423773	0.0624713	0.17875	0.114512	0.00454141	0.0481902	0.011197	0.05	0.0674614	1.0727
TCGA.E9.A1NF	0.0192019	0.00382677	0.0317029	0.0600236	0.0123295	0.0187106	0.051714	0	0	0.420834	0.0559541	0.274758	0.00638225	0.0382158	0	0.01	0.50196	0.866216
TCGA.E9.A1NG	0.022513	0.00107857	0.0275251	0.100141	0	0.00834511	0.0471934	0.00525856	0.00316041	0.201894	0.0300455	0.400884	0.0496903	0.0765968	0.0213138	0.09	0.555547	0.835102
TCGA.E9.A1R7	0.231325	0.236983	0.0308935	0.175685	0	0.0184996	0.00210962	0.0324747	0	0.0370152	0.0662103	0.0820186	0.0150278	0.0717581	0	0.05	0.452374	0.898529
TCGA.E9.A1RB	0.0352252	0.000671193	0.0241635	0.0238012	0	0.101733	0.0164711	0	0	0.475292	0.0658299	0.168274	0.0530843	0	0.0084791	0.01	0.298083	0.990846
TCGA.E9.A1RC	0.00173082	0.0044639	0	0.0993609	0	0.0232992	0.0490236	0	0	0.655831	0	0.034755	0	0.0434921	0	0.06	0.373696	0.964206
TCGA.E9.A1RD	0.0493781	0.0132224	0.066839	0.153915	0	0.0426341	0.0126702	0	0.119675	0	0.0757602	0.301134	0.0570654	0.0931524	0	0	0.0998395	1.03605
TCGA.E9.A1RF	0.0431025	0.011103	0.204417	0.0698585	0.0483045	0.0514031	0.0468354	0.00377119	0	0.171619	0.0915601	0.216225	0.0199437	0.0197466	0.00210991	0.04	0.115936	1.04321
TCGA.E9.A1RH	0.0089271	0.0127417	0.0187591	0.0887471	0.0391297	0.0345973	0.00414067	0	0	0.403824	0.129905	0.071012	0.0785641	0.0696479	0	0.02	0.0209507	1.11004
TCGA.E9.A1RI	0.0715907	0.0117368	0.0885156	0.185765	0	0.0297681	0.0416406	0	0	0.222598	0.0697877	0.191189	0.00120488	0.083963	0.00224103	0.01	0.106231	1.04469
TCGA.GI.A2C8	0.038443	0.00411753	0.0750578	0.0788166	0	0.022967	0.033145	0	0	0.267363	0.0412334	0.286486	0	0.0805695	0.00650055	0	0.194823	1.01533
TCGA.GI.A2C9	0.0141437	0	0.0211434	0.0839074	0.00105448	0.0371637	0.0453909	0.0225894	0.00120738	0.129534	0.0495792	0.303561	0.118529	0.0885731	0	0.54	0.236401	0.990168
TCGA.3C.AAAU	0.1897	0.13082	0.0232178	0.0278952	0	0.0306124	0.0712819	0.0202951	0	0.149696	0.0393649	0.269803	0	0.0371818	0.0101314	0	0.373897	0.932042
TCGA.3C.AALI	0.0490676	0.00767173	0.111483	0.126935	0.0229813	0.116236	0.121101	0.000103658	0	0.185967	0.11699	0.079443	0	0.0447748	0	0.04	0.0719354	1.07036
TCGA.3C.AALJ	0.0776894	0.0284446	0.220726	0.0674852	0.0266815	0.0461793	0.0987957	0	0	0.207799	0.0870058	0.123837	0	0.0153564	0	0.18	0.177937	1.0207
TCGA.3C.AALK	0.0395619	0.00849631	0.0951761	0.198172	0	0.0790008	0.0951115	0.0537036	0.00458674	0.00692994	0.104075	0.143171	0.0571375	0.101004	0	0.02	0.055525	1.06865
TCGA.4H.AAAK	0.0808996	0.014298	0.0809492	0.172992	0	0.0926649	0.0173633	0.024047	0.0425639	0.0952806	0.0771251	0.162953	0.00183205	0.11945	0.00128344	0.02	0.136015	1.0238
TCGA.5L.AAT0	0.066961	0	0.181598	0.0681594	0	0.106578	0.0756774	0.0473471	0.00708826	0.0933278	0.100945	0.0775606	0.0185785	0.1517	0.00447819	0.03	0.102591	1.04806
TCGA.5L.AAT1	0.0398402	0.000960569	0.215693	0.110891	0	0.0832386	0.0846313	0.0519947	0.0158131	0.0183905	0.108544	0.126613	0.0328629	0.107452	0.00307584	0.09	0.0913812	1.06002
TCGA.5T.A9QA	0.00182808	0	0.138941	0.0919034	0	0.009444	0.0468044	0.00703585	0	0.2504	0.0581249	0.383008	0.00642263	0.00174002	0	0.08	0.0971705	1.07477
TCGA.A1.A0SB	0.0801032	0.0164219	0.0923163	0.13918	0	0.0512693	0.00516347	0.00884942	0.153267	0	0	0.289627	0	0.0745318	0	0.03	0.0275686	1.06192
TCGA.A1.A0SD	0.0746846	0.0105776	0.0430717	0.232659	0	0.0525557	0.0438597	0	0	0.061149	0.173767	0.151922	0.0257456	0.102782	0	0.07	0.105391	1.05027
TCGA.A1.A0SE	0.13375	0.03812	0.135417	0.24119	0.00577584	0.0177071	0.0309962	0	0.00352282	0	0.100735	0.0867151	0.065512	0.13827	0.00228985	0.06	0.223028	0.995344
TCGA.A1.A0SF	0.181236	0.132171	0.165489	0.220144	0	0.0291774	0.0422901	0	0.0140568	0.0327846	0.0638414	0.0216957	0.0162195	0.0808954	0	0.17	0.382167	0.930737
TCGA.A1.A0SG	0.203746	0.04562	0.0969679	0.156251	0.000267562	0.0321002	0.0119554	0.0165625	0.0394019	0.0541052	0.0628278	0.100531	0.0541256	0.116093	0.00280622	0.03	0.414525	0.909213
TCGA.A1.A0SH	0.132329	0.0612314	0.0256241	0.187259	0	0.0275753	0	0	0.00404725	0.123055	0.0473927	0.202053	0.00726804	0.171978	0.00433055	0.04	0.277735	0.967925
TCGA.A1.A0SI	0.0892736	0.0553855	0.143874	0.0361643	0.0415627	0.132977	0.0326929	0	0	0.183849	0.0757032	0.115693	0	0.0831214	0	0.06	0.223757	0.992224
TCGA.A1.A0SJ	0.141267	0.0172384	0.182686	0.293431	0.00110285	0.00637363	0.0265558	0	0.0213521	0.0524938	0.075103	0.131765	0.0168948	0.0337361	0	0.02	0.185471	1.0189
TCGA.A1.A0SK	0.10085	0.00475156	0.0850465	0	0	0.0983402	0.0255141	0.046233	0	0.476322	0.0565182	0.0974534	0	0.00897083	0	0.06	0.112311	1.07901
TCGA.A1.A0SM	0	0.00457122	0.0218615	0.188912	0	0.0368536	0.00284587	0.045298	0.0991929	0.100705	0.0132501	0.313617	0	0.103207	0.00463521	0.03	0.135435	1.02721
TCGA.A1.A0SN	0.0655301	0.00868945	0.137813	0.259992	0.0327007	0.0275715	0.0525994	0	0.0133003	0.110667	0.0952291	0.0918185	0.0135405	0.0442585	0	0.04	0.291291	0.968695
TCGA.A1.A0SO	0.161006	0.014938	0.0840595	0.164016	0.0188393	0.0971366	0.0083269	0.0030671	0	0.184478	0.12017	0.127303	0	0.0166589	0	0.02	0.193483	1.0128
TCGA.A1.A0SP	0.0751057	0.0394567	0.0377599	0.120439	0	0.0798163	0.0516865	0.0318158	0.0127921	0.229423	0.0795596	0.0754664	0.101191	0.033621	0.00210999	0.04	0.150226	1.02261
TCGA.A1.A0SQ	0.114144	0.287818	0.108664	0.116793	0	0.0520236	0.00671143	0	0.0243946	0.0250471	0.0125658	0.172001	0	0.0769262	0.00291081	0.07	0.380867	0.940067
TCGA.A2.A04N	0.0557221	0.00134065	0.124239	0.157833	0.00681084	0.08376	0.0189352	0.0170453	0.0108985	0.1585	0.0782543	0.0893408	0.0149111	0.145797	0.00337128	0.06	0.128812	1.03038
TCGA.A2.A04P	0.114138	0.0540528	0.0877681	0.162544	0	0.169943	0.0711456	0.0267165	0.011641	0.0256304	0.152427	0.0499026	0.00819186	0.0358656	0	0.06	0.18802	1.02794
TCGA.A2.A04Q	0.0353083	0.0184034	0.210575	0.0443907	0.0548989	0.0713807	0.0739485	0.0139942	0	0.137377	0.109621	0.106216	0.037343	0.0422007	0.00663988	0	0.098484	1.04989
TCGA.A2.A04R	0.0793402	0.0190863	0.0352014	0.091125	0	0.0235588	0.051218	0	0	0.418049	0.0300641	0.074161	0	0.172277	0.000539659	0.07	0.152151	1.04263
TCGA.A2.A04T	0.113581	0.0336218	0.170538	0.0354085	0.101034	0.132277	0.0236445	0.0121836	0.00191841	0.127518	0.0879405	0.0999655	0.0474532	0.0111636	0	0.01	0.246975	0.983962
TCGA.A2.A04U	0.0940091	0.0373851	0.0931674	0.0493451	0.0157228	0.0862761	0.0252553	0	0	0.311285	0.0460892	0.189329	0	0.0229582	0	0.05	0.157901	1.03165
TCGA.A2.A04V	0.00823474	0.0015943	0.0466965	0.171168	0	0.0120185	0.0497039	0.0540103	0.00858965	0.27034	0.0433242	0.139677	0.011937	0.182706	0	0.13	0.372044	0.930328
TCGA.A2.A04W	0.0825762	0.0307971	0.0527542	0.0402102	0.00511959	0.0650569	0.0282835	0	0	0.418942	0.0558246	0.136626	0	0.0643817	0.000240561	0.02	0.135971	1.05401
TCGA.A2.A04X	0.0539766	0.0209063	0.111358	0.183695	0.0195984	0.0538689	0.0590798	0.0281669	0.0125403	0.0771274	0.156446	0.105666	0.0123089	0.0983442	0.00691704	0.01	0.0917754	1.05491
TCGA.A2.A04Y	0.0522686	0.00622504	0.13913	0.253903	0.00865187	0.0791389	0.0321747	0	0.0117922	0.0528124	0.121877	0.197634	0.00243764	0.041817	0	0.07	0.0835846	1.06367
TCGA.A2.A0CK	0.0987823	0.0464245	0.159257	0.206567	0	0.0568766	0.052038	0.0129923	0.03218	0.000961731	0.107881	0.135077	0.028446	0.0625169	0	0	0.204592	1.00652
TCGA.A2.A0CL	0.061746	0.0152304	0.0804103	0.274228	0.0693247	0.0338296	0.0900771	0	0.00851387	0.0348493	0.138655	0.0933285	0	0.0381222	0	0.02	0.107103	1.05801
TCGA.A2.A0CM	0.0353277	0.00814898	0.1736	0.142502	0.0507481	0.10891	0.0455702	0.0143848	0.00244605	0.17882	0.122841	0.0865977	0	0.029776	0.000327328	0.01	0.0924938	1.06295
TCGA.A2.A0CO	0.14797	0	0.155659	0.145955	0.0152135	0.0757877	0.13389	0.0341741	0.0103041	0.0395493	0.116321	0.0732858	0	0.0326826	0	0.02	0.24613	0.997989
TCGA.A2.A0CP	0.0713786	0.0660198	0.123998	0.149973	0	0.0423344	0.00911484	0.0126246	0.0344024	0.0191877	0.0813572	0.128092	0	0.24906	0	0.02	0.204588	0.9997
TCGA.A2.A0CQ	0	0	0.137445	0.120686	0	0.022966	0.090552	0	0.117281	0	0.0831842	0.349241	0.0318771	0.029087	0.00160521	0.04	0.170524	1.01802
TCGA.A2.A0CR	0.0948324	0.0928051	0.184539	0	0	0.141128	0.120371	0.079461	0.00176818	0.0585305	0.0825898	0.0451283	0.0223404	0.0701807	0	0.03	0.250133	0.992904
TCGA.A2.A0CS	0	0	0.0387153	0.15941	0	0.018017	0.0999042	0	0.00465196	0	0.00265222	0.13207	0.268118	0.176256	0.0100034	0.07	0.38281	0.923682
TCGA.A2.A0CT	0.0953403	0.00702248	0.0271554	0.114078	0	0.0453841	0	0.0330967	0.0723471	0.00339238	0.0618896	0.219949	0.104242	0.211495	0.0012422	0.01	0.19653	0.996695
TCGA.A2.A0CU	0.0899869	0.0022642	0.105436	0.143706	0	0.0863492	0.0450328	0.0228052	0.0129452	0.0175128	0.126926	0.172599	0.0521345	0.122303	0	0.06	0.200494	1.00218
TCGA.A2.A0CV	0.0913002	0.00642605	0.208728	0.17202	0	0.0818007	0.00309563	0	0.0456198	0	0.145546	0.1601	0.0205559	0.0224013	0	0.04	0.130674	1.04769
TCGA.A2.A0CW	0.0464889	0.00986163	0.0960169	0.235171	0.0147528	0.0711969	0.0483513	0.00772091	0.00410088	0.0785781	0.13929	0.171211	0	0.06088	0	0.04	0.17383	1.02199
TCGA.A2.A0CX	0.0591682	0.0114368	0.0672733	0.212289	0.0119285	0.0636247	0.036606	0	0	0.218571	0.0584903	0.22207	0	0.0353489	0.00208505	0.01	0.109769	1.04746
TCGA.A2.A0CY	0.0201331	0.00864166	0.145914	0	0	0.111387	0.0168711	0.0509307	0	0.500492	0.00187107	0.101795	0	0.0292167	0.0110687	0.06	0.196649	1.04353
TCGA.A2.A0CZ	0.144076	0.0596715	0.0849601	0.117063	0	0.0604532	0.0381888	0.02678	0	0.215483	0.0739876	0.085123	0.00166404	0.0925504	0	0.01	0.275641	0.971901
TCGA.A2.A0D0	0.0612256	0.00191254	0.209019	0.0270491	0.0561107	0.111043	0.0579626	0.0026385	0	0.21347	0.0736539	0.117105	0.0375466	0	0.00246312	0.02	0.231874	0.995842
TCGA.A2.A0D1	0.0521574	0.0142376	0.160141	0.113368	0.0231315	0.117378	0.0276463	0	0	0.32896	0.0558427	0.0996845	0	0.00319623	0	0.02	0.105805	1.06229
TCGA.A2.A0D2	0.0739311	0.00797617	0.190675	0.064418	0.0559391	0.0615765	0.0162127	0	0.00500066	0.228536	0.106744	0.0972149	0.0482832	0.0230445	0	0	0.116739	1.0426
TCGA.A2.A0D3	0.146952	0.0337607	0.220051	0.233823	0.0180907	0.0528175	0.0322863	0	0.0214138	0	0.102093	0.109551	0.0196603	0.00830252	0.00119855	0.01	0.243861	0.999397
TCGA.A2.A0D4	0.0821979	0.0249377	0.0406436	0.16053	0.00345548	0.0455811	0.00917453	0.00367223	0	0.0613391	0.084794	0.286811	0.00581408	0.188315	0	0.04	0.266337	0.972425
TCGA.A2.A0EM	0.00805929	0.00480457	0.062526	0.162439	0	0.0410357	0.00491696	0.0129056	0.133835	0	0.0543163	0.170807	0.092976	0.171975	0.000353839	0.06	0.0653628	1.04593
TCGA.A2.A0EN	0.0881367	0.000417097	0.147856	0.237463	0.00662785	0.0627845	0.0706851	0.014941	0.00563733	0.0301395	0.0816895	0.107329	0.0652982	0.0759372	0.00505678	0.07	0.179469	1.01799
TCGA.A2.A0EO	0.0923669	0.0430669	0.116563	0.208281	0	0.0834589	0.0223809	0.00257194	0	0.0987735	0.102716	0.100114	0.0172378	0.103442	0.00902778	0.04	0.186147	1.00999
TCGA.A2.A0EP	0.103344	0.0063105	0.0633068	0.0917426	0.0451704	0.0950756	0.0772861	0.00273576	0.0138457	0.217887	0.0378363	0.112768	0.0877968	0.0338418	0	0	0.201356	1.00156
TCGA.A2.A0EQ	0.0798048	0.0340039	0.172453	0.0915366	0.0608607	0.0787747	0.088245	0	0	0.17265	0.0991236	0.0874429	0	0.0319785	0.00312659	0	0.150442	1.02984
TCGA.A2.A0ER	0.0659303	0.0223089	0.008742	0.237697	0	0.0818204	0.0114966	0.00869101	0.0268851	0.0608008	0.0669616	0.118838	0.0517379	0.214306	0.00423998	0	0.144012	1.01916
TCGA.A2.A0ES	0.131731	0.0328824	0.104593	0.317368	0.002431	0	0	0.0148856	0.00420804	0	0.0889849	0.169432	0.0673412	0.0513484	0.000181874	0.06	0.228922	0.992744
TCGA.A2.A0ET	0.0756703	0.0146611	0.134908	0.199907	0	0.0883138	0.0336284	0.0218417	0.064501	0	0.0782391	0.151356	0.110842	0	0	0.03	0.211004	0.999734
TCGA.A2.A0EU	0.00647523	0.00243925	0.0598126	0.205883	0	0.0528359	0.0364984	0.0223429	0	0.128505	0.0921271	0.0840709	0.0380063	0.232368	0.0112441	0.05	0.0986592	1.04552
TCGA.A2.A0EV	0.0532141	0.005087	0.0801093	0.130585	0.0122137	0.0332109	0.0423936	0	0	0.31121	0.0850902	0.166416	0.00215106	0.0590399	0	0.39	0.0731856	1.06878
TCGA.A2.A0EW	0.110811	0	0.111008	0.291018	0	0.0201403	0	0.03569	0.0324979	0	0.0763713	0.163881	0.0215707	0.125908	0.00161948	0.04	0.164896	1.01782
TCGA.A2.A0EX	0.129003	0	0.0802717	0.215445	0	0.0631331	0.0856439	0.000759676	0.0110118	0.18485	0.0678664	0.0573321	0.00231472	0.0975348	0.00483309	0.02	0.0573424	1.06625
TCGA.A2.A0EY	0.105785	0.05227	0.098341	0.186368	0.00621694	0.0700795	0.0264096	0.0282111	0.0543981	0.0343898	0.0726073	0.114557	0.044	0.106368	0	0.06	0.233067	0.985664
TCGA.A2.A0ST	0.0495608	0.0451642	0.178343	0.0848074	0.0379228	0.114227	0.0744123	0.0103548	0.000935464	0.0813125	0.141603	0.0391199	0.0722998	0.00934455	0	0.07	0.177307	1.02415
TCGA.A2.A0SU	0.0387398	0	0.0664536	0.197906	0.0183566	0.0441072	0.0858912	0	0	0.132242	0.109206	0.13163	0.0483981	0.125385	0.00168554	0.06	0.169557	1.01538
TCGA.A2.A0SV	0.0333322	0.00526325	0.0132999	0.192191	0.0221978	0.0661575	0.050956	0	0.015577	0.232803	0.097046	0.201893	0.0101648	0.0358209	0.00870753	0.03	0.00644266	1.09132
TCGA.A2.A0SW	0.0457515	0.0480268	0.251932	0.108374	0.0171576	0.0402308	0.0993045	0.0208491	0.0165347	0.0701575	0.0648892	0.139218	0.0242355	0.0533387	0	0.01	0.136141	1.03618
TCGA.A2.A0SX	0.0395281	0.0146074	0.0843208	0.216872	0.0201139	0.0757077	0.0863327	0.00926848	0	0.243767	0.100311	0.0967965	0.0123736	0	0	0.05	0.0595385	1.07913
TCGA.A2.A0SY	0.147696	0.0478589	0.0893781	0.237522	0	0.0562252	0.0366259	0.0173594	0.00983809	0.0343201	0.0750394	0.131371	0.0347636	0.0820031	0	0.01	0.288995	0.966098
TCGA.A2.A0T0	0.049984	0.0101891	0.0349351	0.149375	0.00360402	0.0703841	0.0839035	0	0	0.277888	0.104032	0.162611	0	0	0.00473118	0.07	0.116135	1.05219
TCGA.A2.A0T1	0.0211941	0.00937048	0.138861	0.112451	0.0183843	0.0706644	0.0895627	0.0101612	0	0.174024	0.114457	0.159296	0.0156376	0.0381938	0	0.07	0.0491093	1.07533
TCGA.A2.A0T2	0.02885	0.00318161	0.232626	0.0301517	0.0380187	0.128512	0.0233983	0	0	0.131836	0.126466	0.177941	0.00966491	0.02112	0.0369369	0.02	0.135939	1.03957
TCGA.A2.A0T3	0.0865254	0.0189871	0.0626917	0.145614	0	0.0639378	0.0307029	0	0	0.311262	0.11069	0.122262	0	0.00369752	0	0.06	0.209835	1.01104
TCGA.A2.A0T4	0.0625573	0.0102544	0.114812	0.132067	0	0.0787423	0.0227726	0.016281	0	0.153789	0.0715615	0.105234	0.00106707	0.204037	0.000484018	0.53	0.156555	1.01933
TCGA.A2.A0T5	0.0720482	0	0.0266467	0.162203	0	0.0736128	0.0717755	0.0276974	0.0513768	0.156408	0.0382114	0.164965	0.00821351	0.0822321	0.00295023	0.07	0.0742489	1.04818
TCGA.A2.A0T6	0.116079	0.000823894	0.0939752	0.240959	2.39988e-05	0.0827044	0.00416093	0.0110107	0	0.0368363	0.083931	0.134629	0.0207972	0.152734	0.00121912	0.04	0.217458	0.996422
TCGA.A2.A0T7	0.109153	0.0107903	0.124562	0.24201	0.000875623	0.0295233	0.00664069	0	0.0210868	0.0982967	0.0578487	0.218957	0.000879388	0.0793764	0	0.08	0.203676	1.00077
TCGA.A2.A0YC	0.0520808	0.0131969	0.0599366	0.152225	0.018505	0.0404237	0.0275521	0	0.0164801	0.0992526	0.073108	0.140659	0.168045	0.102733	0.0296568	0.08	0.121235	1.02481
TCGA.A2.A0YD	0.133881	0.01019	0.0757478	0.170767	0.0132614	0.0458497	0.0482015	0.0150616	0.00571513	0.137275	0.10362	0.135253	0.0126095	0.0774659	0.00288321	0.02	0.235077	0.987248
TCGA.A2.A0YE	0.110744	0.0897337	0.0114521	0.172873	0	0.115966	0.0161818	0.040574	0.000887056	0.0985832	0.109152	0.105956	0	0.0643505	0	0.39	0.24975	0.984296
TCGA.A2.A0YF	0.0799296	0	0.0513942	0.0258781	0.0178733	0.0563361	0.0483909	0	0	0.334625	0.045038	0.255748	0.0159835	0.0604474	0	0.01	0.145369	1.04518
TCGA.A2.A0YG	0.0816188	0.0103612	0.0457223	0.179214	0.0191949	0.0641626	0.0354752	0	0	0.217747	0.0689324	0.220657	0	0.0457425	0	0.03	0.12476	1.03785
TCGA.A2.A0YH	0.0652559	0.0477553	0.038268	0.0976871	0.00643361	0.0941378	0.0978785	0	0.00360762	0.053507	0.0517794	0.249218	0.00951532	0.101655	0.027866	0.04	0.156622	1.01366
TCGA.A2.A0YI	0.0632833	0.00246743	0.0911393	0.210366	0.0084635	0.0539819	0.0380947	0	0.0166643	0.158886	0.106037	0.162902	0.0212719	0.0459039	0	0.06	0.0840014	1.05451
TCGA.A2.A0YJ	0.0014285	0.00040207	0.114362	0.121861	0	0.0227322	0.0151614	0	0	0.582099	0.0296241	0.0805611	0	0	0.00323145	0.05	0.0602054	1.13874
TCGA.A2.A0YK	0.157482	0.0493833	0.169226	0.169562	0.0396467	0.111463	0.0265038	0	0.000560002	0.0119159	0.0740972	0.0613133	0.0555855	0.0713351	0.000856136	0.06	0.283225	0.973486
TCGA.A2.A0YL	0.156732	0.0283357	0.0814066	0.273833	0	0.0290253	0.0247568	0.00982935	0.0138641	0.0283199	0.123318	0.0925964	0.0305797	0.106904	0	0.01	0.237575	0.990791
TCGA.A2.A0YM	0.0197937	0.000457283	0.0326757	0.146701	0.00876852	0.0338487	0.00907975	0.00048427	0	0.452007	0.0728781	0.122335	0	0	0.000381394	0.04	0.187318	1.04507
TCGA.A2.A0YT	0.0355052	0.0110159	0.229889	0.144622	0.0235712	0.0113416	0.0242554	0.0122393	0.0195162	0	0.109093	0.257695	0.0146202	0.0440586	0.0160694	0.04	0.0971072	1.05097
TCGA.A2.A1FV	0.0760074	0.0123697	0.0203666	0.134594	0	0.0732379	0	0.0641809	0	0	0.0536113	0.215015	0	0.350617	0	0.27	0.124745	1.04084
TCGA.A2.A1FW	0.0680741	0.0138388	0.041396	0.427074	0.014942	0	0	0	0.000408529	0	0.131108	0.227751	0.00300611	0.067951	0.00201914	0.03	0.101063	1.05441
TCGA.A2.A1FX	0.0766154	0.0118135	0.132542	0.133062	0	0.0382711	0.0259166	0	0.105689	0.0281424	0.0796167	0.194269	0	0.163888	0	0	0.232111	0.984585
TCGA.A2.A1FZ	0.0656723	0.0143228	0.0845682	0.171755	0	0.0436288	0.0103018	0	0.0681166	0.0544534	0.0908076	0.200639	0.0822897	0.113444	0	0.04	0.171025	1.00718
TCGA.A2.A1G0	0.180598	0.109823	0.0693335	0.245283	0	0.0327969	0.0183732	0	0.0200676	0.0194855	0.116795	0.0889629	0.0375818	0.0571578	0	0.04	0.352144	0.941778
TCGA.A2.A1G1	0.0680096	0.0018223	0.113098	0.146319	0.0779121	0.0915238	0.0216529	0	0	0.0741209	0.130978	0.205282	0.00843561	0.00518644	0.0197852	0.02	0.0923199	1.05379
TCGA.A2.A1G4	0.107778	0.0399737	0.124937	0.150192	0	0.12296	0.00473409	0	0.0564743	0.0303039	0.0852765	0.198799	0.0186298	0.0473829	0.0125593	0.06	0.190326	1.00577
TCGA.A2.A1G6	0.0892015	0.00925113	0.181067	0.150018	0	0.022829	0.055387	0.00969422	0.0101132	0	0.0160626	0.212068	0.104718	0.125914	0.00938491	0.04	0.134484	1.02508
TCGA.A2.A259	0.159882	0	0.0183125	0.148684	0.0539706	0.0482152	0.0889439	0	0.0247587	0.0488356	0.095352	0.0542872	0.0447322	0.192064	0.0121049	0.02	0.221469	0.991181
TCGA.A2.A25A	0.130867	0.0479099	0.105498	0.175414	0.0132838	0.027074	0.0276718	0	0	0	0.124604	0.122134	0.0665554	0.139298	0.000776904	0.06	0.250105	0.98143
TCGA.A2.A25B	0.0227716	0.0085977	0.0496459	0.301483	0.0175775	0.0579745	0.021533	0.0120791	0.0300928	0.117121	0.0822124	0.212363	0	0.0252773	0.0260458	0.08	0.0397579	1.074
TCGA.A2.A25C	0.0870347	0.0139487	0.0376522	0.323467	0.010072	0.0520627	0.0198978	0	0	0.0747512	0.132585	0.153717	0.0320474	0.0465789	0.000705332	0.05	0.121813	1.04158
TCGA.A2.A25D	0.0604134	0	0.166368	0.203298	0.0619322	0.076943	0.0289516	0	0.022951	0.00573828	0.123666	0.116051	0.0137422	0.0782691	0	0.07	0.143844	1.03692
TCGA.A2.A25E	0.128608	0.00309016	0.0280266	0.28827	0	0.0944026	0.00790328	0	0	0.0128857	0.137417	0.20833	0.0263262	0.0528252	0	0.05	0.177631	1.01862
TCGA.A2.A25F	0.0520884	0.00659667	0.123022	0.266637	0.065674	0.0304774	0.0304744	0	0	0.158087	0.0890825	0.116685	0.00963222	0.0300765	0.00699284	0.02	0.0972095	1.05274
TCGA.A2.A3KC	0.114932	0.0312272	0.0444464	0.225193	0	0.0536991	0.0459736	0	0	0.118745	0.0831166	0.177468	0.0157186	0.0667237	0	0.09	0.188724	1.00624
TCGA.A2.A3KD	0.21187	0.125111	0.0641218	0.0966314	0.00349462	0.0159478	0.0296597	0.0375747	0.0317795	0.029333	0.0574723	0.214957	0	0.0758898	0.000154657	0.02	0.414715	0.910013
TCGA.A2.A3XS	0.12444	0	0.114787	0.15367	0	0.138808	0.101417	0.0482669	0.0120457	0.0620226	0.0768118	0.100684	0.00388809	0.0504107	0.00139701	0.07	0.154623	1.03428
TCGA.A2.A3XT	0.044227	0.0103858	0.0178797	0.080359	0.0135697	0.0292147	0.0375472	0	0	0.529348	0.09811	0.0747939	0.0211093	0.0291463	0	0.02	0.204963	1.0441
TCGA.A2.A3XU	0.1055	0.159651	0.0631798	0.00983488	0	0.083608	0.0352737	0	0.00362346	0.295829	0.0120657	0.20322	0.00583388	0	0	0.03	0.302545	0.973471
TCGA.A2.A3XV	0.0708317	0.00893328	0.0356073	0.0590939	0	0.0839762	0.0758123	0.0594089	0.00780326	0.195942	0.0767383	0.299698	0	0.0250743	0	0.03	0.223579	0.999036
TCGA.A2.A3XW	0.00543591	0.00345322	0.0970626	0.0858747	0	0.0123615	0.139832	0.0383474	0.00118495	0.112873	0.0240536	0.128683	0.179835	0.151491	0.00354547	0	0.243959	0.981691
TCGA.A2.A3XX	0.0992184	0.0214203	0.0679203	0.0608843	0.0546872	0.0727517	0.0387933	0	0	0.289078	0.119414	0.126622	0.00300213	0	0	0.03	0.13567	1.04046
TCGA.A2.A3XY	0.0758185	0.00678841	0.0267428	0.0969659	0	0.114389	0.0911229	0.0169926	0	0.305043	0.113092	0.0780978	0.0189692	0.0559771	0	0.01	0.156926	1.03195
TCGA.A2.A3XZ	0.243664	0.0490592	0.0522338	0.0852558	0.0522319	0.0789709	0.109527	0.0235506	0	0.02813	0.0512887	0.100157	0.074545	0.0447199	0.00640548	0.05	0.361312	0.935238
TCGA.A2.A3Y0	0.0306785	0	0.192857	0.0266793	0.0709514	0.128536	0.110787	0.0995789	0.00248216	0.129288	0.074337	0.069336	0.0183408	0.0338787	0.00755734	0.07	0.0529154	1.08544
TCGA.A2.A4RW	0.116459	0.0342902	0.11786	0.104536	0.0100273	0.0425702	0.060681	0.0164677	0.00861838	0	0.0880779	0.12632	0.050557	0.214731	0.00151575	0.01	0.250824	0.979325
TCGA.A2.A4RX	0.201623	0.0425951	0.0637943	0.214529	0	0.0487905	0.0492852	0.0205514	0	0.138669	0.069092	0.0791922	0.0195221	0.0498391	0.000789425	0.04	0.296823	0.964942
TCGA.A2.A4RY	0.241072	0.086877	0.102264	0.119591	0	0.077886	0.0255321	0.0386542	0.0222269	0.0269317	0.0441891	0.0900418	0.0289619	0.0957715	0	0.03	0.39568	0.919856
TCGA.A2.A4S0	0	0.0124479	0.0544721	0.189236	0	0.0491456	0.101887	0	0.0471838	0.0683947	0.0118493	0.147391	0.0239805	0.229927	0.0135944	0.04	0.135118	1.02701
TCGA.A2.A4S1	0.0062261	0	0.0107179	0.129021	0	0	0.038063	0.0121903	0.00583064	0.163217	0.0350689	0.554937	0.000547874	0.015167	0.0087555	0	0.577729	0.817791
TCGA.A2.A4S2	0.065126	0.00766775	0.133739	0.170433	0.0317632	0.0664403	0.0354902	0.00625909	0.00175968	0.204489	0.0877149	0.123992	0	0.0597567	0	0.01	0.196573	1.00823
TCGA.A2.A4S3	0.0476053	0.00363496	0.0959215	0.177437	0.0140277	0.105999	0.107524	0.0149757	0	0.183641	0.0851349	0.0976647	0.0120445	0.0543896	0	0.04	0.0811505	1.06289
TCGA.A7.A0CD	0.0521537	0.0642746	0.0425373	0.07004	0.0060001	0.0250935	0.0318118	0	0.0182329	0	0.0497386	0.255919	0.0103071	0.373892	0	0.04	0.165039	1.02584
TCGA.A7.A0CG	0.126962	0.0780583	0.112768	0.258995	0.0347455	0.058583	0.0143221	0	0.000810191	0.00246866	0.0642907	0.11247	0.0332263	0.0884791	0.00119756	0	0.285836	0.969208
TCGA.A7.A0CJ	0.072638	0.0197203	0.0260432	0.204171	0.0419781	0.0974231	0.0493278	0	0	0.216074	0.0768308	0.104392	0.0135344	0.0365157	0.0120376	0.05	0.181718	1.0128
TCGA.A7.A0DA	0.0543394	0.00408475	0.0442822	0.0797948	0	0.0269753	0.0401872	0	0	0.344148	0.0975391	0.251216	0	0	0.0111172	0.02	0.181502	1.03706
TCGA.A7.A13H	0.0798949	0.0365119	0.0489539	0.0539062	0	0.052778	0.0780515	0.0139716	0	0.403553	0.0859189	0.0339232	0.0084046	0.0958285	0	0.1	0.152507	1.03908
TCGA.A7.A26G	0.0989052	0.101879	0.105542	0.203262	0.0239785	0.050744	0.0198575	0	0	0.0560758	0.0961345	0.130772	0.0398733	0.0538088	0.00274813	0.01	0.273084	0.97321
TCGA.A7.A26H	0.0599687	0.0137275	0.0649002	0.205859	0.00818996	0.0525784	0.0109139	0	0	0.252516	0.111	0.156386	0.01817	0.0420426	0	0	0.129116	1.04129
TCGA.A7.A2KD	0.0398288	0.00754641	0.0563237	0.24616	0.0322954	0.0535791	0.0760001	0	0	0.125822	0.100375	0.190817	0.000864178	0.037221	0.00764017	0.04	0.0751414	1.06033
TCGA.A7.A3IY	0.0129397	0.000394896	0.0252636	0.00306019	0	0.0244665	0.0359304	0.0340309	0.000330028	0.453578	0.0414148	0.219932	0	0	0	0.06	0.734864	0.69249
TCGA.A7.A3IZ	0.0437511	0.0188686	0.025105	0.0804636	0	0.027616	0.0169815	0.000550605	0	0.120661	0.0254846	0.264817	0	0.363291	0.0120917	0.05	0.338619	0.948955
TCGA.A7.A3J0	0.0513221	0.00966851	0.109415	0.117878	0.00533672	0.0996358	0.0885697	0.0286331	0	0.170031	0.158473	0.117953	0.00163872	0.0414457	0	0.02	0.21946	1.0056
TCGA.A7.A3J1	0.0937117	0	0.142928	0.243709	0.0275751	0.0470359	0.0754476	0	0.0127251	0.0521609	0.117547	0.0636348	0.0161136	0.0661422	0.00437098	0.02	0.148152	1.03785
TCGA.A7.A3RF	0.0359752	0.00737503	0.06808	0	0	0.0549205	0.0337385	0.0231659	0	0.380449	0.0559762	0.152161	0.000900927	0.187257	0	0.04	0.171934	1.03413
TCGA.A7.A425	0.0618568	0.00753653	0.0845567	0.141232	0	0.0540036	0.0253221	0.0100993	0.0842864	0	0.0426243	0.301924	0.0180524	0.150172	0	0.06	0.118207	1.02827
TCGA.A7.A426	0.133601	0.0793563	0.146771	0.140642	0	0.100233	0.0210035	0.0282961	0.00830656	0	0.0505113	0.078546	0.035523	0.17021	0	0.01	0.300487	0.962806
TCGA.A7.A4SA	0.0803741	0.0119845	0.175725	0.295173	0.0121345	0.0440062	0.0718703	0	0.029678	0	0.109327	0.0909336	0.028517	0.0427814	0	0.01	0.181964	1.02863
TCGA.A7.A4SB	0.285609	0.112705	0.105126	0.130844	0	0.0148538	0.00398709	0.0267754	0.00630134	0.0527719	0.0894618	0.0116797	0	0.159884	0	0.01	0.421051	0.910749
TCGA.A7.A4SC	0.154817	0.0223601	0.145459	0.100554	0.00203933	0.0330808	0.0755023	0	0.0266069	0	0.136099	0.117706	0.0404145	0.145361	0	0.04	0.244714	0.985792
TCGA.A7.A4SD	0.0874232	0.0139248	0.0986222	0.1635	0.0257381	0.0820367	0.100137	0.0181989	0.0293513	0.18209	0.127393	0.0270042	0	0	0	0.02	0.113719	1.05424
TCGA.A7.A4SE	0.0193246	0.0040657	0.0357261	0.189633	0	0.0642489	0.0571306	0	0	0.363905	0.144292	0.0739154	0.0100238	0	0	0	0.291564	0.980795
TCGA.A7.A4SF	0.128726	0.0537687	0.0823169	0.127792	0.0194182	0.0660486	0.0785959	0	0	0.185934	0.0970488	0.0884088	0	0.0619979	0	0.06	0.284125	0.968764
TCGA.A7.A56D	0.000120577	0.0377517	0.0354052	0	0.0134448	0.0543478	0.0645319	0.0470219	0	0.359183	0.0195617	0.187521	0	0.0935924	0.00392106	0	0.0573994	1.08294
TCGA.A7.A5ZV	0.0447986	0.00235107	0.0706421	0	0	0.0351937	0.0360009	0.0301522	0.0792041	0.34626	0.0432515	0.151983	0.040501	0.0462155	0.0208327	0.03	0.249622	0.994245
TCGA.A7.A5ZW	0.0678	0.0104287	0.111179	0.182694	0.0113572	0.0287964	0.0279046	0	0	0.120129	0.0422981	0.165176	0.06583	0.166407	0	0.03	0.175039	1.00792
TCGA.A7.A5ZX	0.139096	0.101084	0.0576277	0.0621822	0	0.0512229	0.00549468	0.0118396	0	0.0768486	0.0346349	0.172209	0.0100003	0.273999	0.00376193	0.03	0.330467	0.94855
TCGA.A7.A6VV	0.0844519	0.0335105	0.0231134	0.044698	0	0.0375891	0.046693	0.00891174	0	0.521663	0.0793276	0.0983788	0	0.0216633	0	0.04	0.157667	1.06767
TCGA.A7.A6VW	0.0679688	0.0913844	0.0240587	0.041402	0	0.109077	0.038113	0.0286488	0.0440691	0.190001	0.0601104	0.148153	0	0	0.0448208	0.01	0.241684	0.987744
TCGA.A7.A6VX	0.0355477	0.0182782	0.0356033	0.053204	0	0.0839672	0.0455847	0.0224561	0	0.283847	0.0703896	0.288573	0.0198688	0.0370671	0.00561305	0.01	0.253243	0.991956
TCGA.A7.A6VY	0.016893	0.128725	0.0478964	0.0615996	0.0875823	0.0646784	0.0698358	0	0	0.264473	0.0915545	0.102375	0.0112681	0.0124073	0	0.02	0.204447	1.00666
TCGA.A8.A06O	0.0567135	0.00762722	0.0979195	0.132634	0.0300181	0.0499159	0.0519421	0.00161363	0	0.113141	0.0935374	0.272177	0.044762	0.0410091	0	0.06	0.0798937	1.05194
TCGA.A8.A06P	0.0393037	0.0196335	0.0622973	0.109992	0	0.0366572	0.0601212	0	0	0.179321	0.0301106	0.27987	0	0.163496	0.0162509	0.02	0.0750739	1.0545
TCGA.A8.A06Q	0.0741565	0.00521836	0.028512	0.199991	0	0.0546693	0	0.0105875	0.0118567	0	0.0919481	0.378804	0.00600628	0.138251	0	0.08	0.102852	1.0408
TCGA.A8.A06R	0.0338725	0.153157	0.0298355	0.11827	0.0242769	0.0652208	0.060742	0	0	0.214156	0.0925318	0.153915	0.00367256	0.038343	0.00607155	0.07	0.32335	0.953426
TCGA.A8.A06T	0.0664401	0.00897758	0.140475	0.174421	0.034634	0.0995864	0.0359009	0	0.000350014	0.063609	0.161199	0.152793	0.0334127	0.0210103	0	0.03	0.0990576	1.05899
TCGA.A8.A06U	0.0823147	0.0157857	0.0829861	0.120772	0.0102785	0.078522	0.0567302	0.00417258	0.0137793	0.0240039	0.120863	0.268211	0.0364486	0.0790349	0	0.03	0.127366	1.03064
TCGA.A8.A06X	0.022981	0.00700564	0.111724	0.0775186	0.0383114	0.0992796	0.0421936	0.0266468	0	0.228909	0.0792511	0.232503	0	0.0254999	0	0.05	0.0770894	1.06379
TCGA.A8.A06Y	0.334091	0.0625934	0	0	0	0.0341793	0.0569182	0	0	0.171436	0.0356091	0.195941	0	0.0242667	0.00020548	0	0.309152	0.969589
TCGA.A8.A06Z	0.00393586	0	0	0.0756155	0	0.016094	0.0412479	0.00397597	0.010942	0.322728	0.00401851	0.382976	0.00855578	0.0878559	0	0.01	0.491976	0.871673
TCGA.A8.A075	0.0241065	0.039894	0.0927227	0.135995	0.0111948	0.0795066	0.0332276	0	0	0.178399	0.122131	0.150025	0.0385646	0.0791492	0.0050451	0.01	0.103587	1.04358
TCGA.A8.A076	0.0730031	0.0346884	0.118975	0.0973922	0.00329337	0.0131388	0.0520283	0	0.00194828	0.173195	0.0726174	0.206076	0.0263089	0.119583	0.00775192	0.01	0.164152	1.01449
TCGA.A8.A079	0	0.0117638	0.109445	0.0602353	0	0.028799	0.113138	0	0.00969297	0.290893	0.0901463	0.164418	0.0103959	0.0561885	0	0.03	0.081764	1.06335
TCGA.A8.A07B	0.0380323	0.00818028	0.107949	0.16787	0.0400789	0.0550759	0.0348599	0	0.0355622	0.0218308	0.0862186	0.283793	0.00799881	0.081772	0.00646936	0.01	0.145285	1.02195
TCGA.A8.A07C	0.0507874	0.00102592	0.0911399	0.11731	0.0989993	0.0721651	0.01991	0	0	0.149985	0.0764087	0.239744	0	0.0124309	0.00161787	0.05	0.0633346	1.06015
TCGA.A8.A07E	0.0365772	0.00550145	0.167224	0.122224	0.0148789	0.0237448	0.0556504	0	0.00718579	0	0.124806	0.163708	0.0824296	0.1947	0	0.07	0.424066	0.904843
TCGA.A8.A07F	0.0279299	0.00866066	0.085842	0.262433	0	0.0308033	0.0435375	0.0230032	0.00390685	0.0904257	0.0686563	0.170203	0.0484262	0.135779	0.000393178	0.01	0.00357387	1.07921
TCGA.A8.A07G	0.0895767	0	0.0800122	0.132083	0.00593362	0.0814891	0.0238564	0	0	0.176212	0.116791	0.179628	0.0193511	0.0755597	0.00513397	0	0.130314	1.03342
TCGA.A8.A07I	0.0211136	0.00126638	0.0552898	0.0964188	0.0164242	0.0297918	0.0817043	0	0	0.340151	0.109665	0.179662	0.0179608	0.0423052	0.00707284	0.04	0.0232053	1.10281
TCGA.A8.A07J	0.0251569	0.000263103	0.0285541	0.148116	0	0.0191755	0.0227099	0	0.0594908	0.274699	0.0418079	0.192744	0.0532923	0.128526	0	0.23	0.232819	0.994554
TCGA.A8.A07L	0.0708939	0.0172484	0.0745191	0.131498	0	0.0524044	0.0473955	0.00457338	0.000495972	0.118563	0.0526592	0.333544	0.012716	0.0789402	0.00454849	0	0.131618	1.03071
TCGA.A8.A07O	0.0473737	0.010922	0.0594538	0.0682733	0.0342292	0.027086	0.0621931	0	0	0.595553	0.0236513	0.0309636	0	0	0	0.03	0.229225	1.0393
TCGA.A8.A07P	0.0349652	0.0013078	0.0500458	0.143713	0.0215455	0.0148554	0.0062925	0.00656408	0.0808563	0	0.0515442	0.314544	0.00651436	0.243459	0.000763333	0	0.213818	0.994638
TCGA.A8.A07R	0.104492	0.0203903	0.0255089	0.134314	0.0260452	0.0757268	0.00265926	0	0	0.17153	0.169295	0.199633	0	0.000344722	0.0398417	0.07	0.13	1.04436
TCGA.A8.A07S	0.0394688	0.0104425	0	0.10927	0	0.0694763	0.0205774	0.00582926	0.0513164	0.242364	0.0631896	0.312973	0.00144422	0.0480357	0.0227296	0.04	0.210433	1.00945
TCGA.A8.A07U	0.0771765	0	0.0894528	0.147361	0.00407772	0.123924	0.0662943	0.0518544	0.00168703	0.0735503	0.186366	0.101449	0.0055308	0.0624794	0	0.1	0.0776052	1.07558
TCGA.A8.A07W	0.0351849	0.00592227	0.0516874	0.113609	0	0.0574547	0.0377871	0	0	0.344024	0.0673252	0.241201	0	0.033671	0.00568545	0.06	0.106507	1.06692
TCGA.A8.A07Z	0.0328299	0	0.1161	0.0258822	0	0.0543093	0.0935606	0	0.018679	0.020931	0.0136238	0.287277	0.0289894	0.200544	0	0.06	0.153134	1.01667
TCGA.A8.A082	0.000826887	0.000232879	0	0.167845	0	0.00512145	0.0234362	0.00627449	0	0.226414	0.0307135	0.399691	0.00778795	0.0495896	0.0118849	0.01	0.179742	1.02953
TCGA.A8.A084	0.0921723	0.0466783	0	0.0837567	0	0.0598689	0.0185328	0.00972696	0	0.383731	0.0880217	0.119716	0.00154998	0.0490096	0.0452884	0.02	0.205486	1.01884
TCGA.A8.A085	0.00555836	0	0.00107155	0.0641243	0	0	0.00509925	0	0	0.447777	0.00724903	0.278638	0	0.145374	0	0.01	0.362045	0.956082
TCGA.A8.A086	0.0398045	0.00873649	0.021003	0.0565601	0	0.0257244	0.0253684	0	0	0.428668	0.0478981	0.248415	0	0.0819824	0.0125934	0.01	0.126971	1.07584
TCGA.A8.A08A	0.0317236	0.00568276	0.05235	0.13423	0.00295113	0.0960198	0.0276305	0	0	0.300423	0.0743383	0.20807	0.0238468	0.0314769	0.00322547	0.04	0.176533	1.02645
TCGA.A8.A08B	0.0651427	0.0856983	0.0941375	0.12601	0	0.106406	0.0494285	0.0480417	0.00432158	0.126803	0.129676	0.037872	6.66361e-05	0.126395	0	0.05	0.221786	0.998094
TCGA.A8.A08C	0.0427912	0.000149968	0.107724	0.16596	0	0.0893269	0.0426521	0.0291375	0.0265733	0.039912	0.0682146	0.200834	0.0686039	0.064576	0.00507503	0.02	0.0740906	1.05072
TCGA.A8.A08F	0.00904185	0.00505647	0.0733407	0.179616	0.0133351	0.0428761	0.0422293	0.0149313	0.0104873	0.210772	0.113517	0.261385	0.0153874	0	0.00452862	0	0.415213	0.910552
TCGA.A8.A08G	0.0341037	0.0095221	0.0539535	0.16656	0.000881911	0.0907736	0.0561753	0	0	0.152633	0.148055	0.197826	0.00935314	0.0590151	0.00789919	0.03	0.210164	1.00498
TCGA.A8.A08I	0.0340826	0.00970318	0.204541	0.0220857	0.0538851	0.0428245	0.0435457	0	0	0.343863	0.115317	0.0887616	0.0125664	0.0288238	0	0.05	0.0743839	1.0762
TCGA.A8.A08J	0.0182631	0.0470977	0.0156207	0.0704273	0	0.0165765	0.0700735	0	0	0.321163	0.0596434	0.278196	0	0.0837334	0.00663997	0	0.0927478	1.06957
TCGA.A8.A08L	0.0531894	0.00555333	0.136869	0.149867	0.0420601	0.102853	0.0629384	0.0187613	0.00982454	0.102835	0.0985394	0.176936	0.00689181	0.0328823	0	0.04	0.160724	1.0251
TCGA.A8.A08O	0.142152	0.125541	0.0501667	0.172524	0	0.0421539	0.0186484	0.0439358	0.0269015	0.0198058	0.0669631	0.158695	0.0190798	0.113433	0	0.05	0.362052	0.933524
TCGA.A8.A08P	0.0122869	0.0154342	0.0671093	0.164911	0.016854	0.0900562	0.0620562	0.0284473	0	0.123719	0.117445	0.163429	0.0112582	0.0924696	0.0144751	0.02	0.122099	1.03757
TCGA.A8.A08R	0.0323129	0	0.0691821	0.124469	0.0617139	0.0594023	0.0329692	0	0	0.294746	0.142131	0.12062	0	0.0229328	0	0.07	0.039722	1.08864
TCGA.A8.A08S	0.0275236	0.00823973	0.0593726	0.0734104	0	0.0588278	0.0308855	0.0443866	0	0.320024	0.0726185	0.165288	0.0326037	0.0936993	0.0131202	0.01	0.0656396	1.07211
TCGA.A8.A08T	0.00584956	0.00041238	0.0818717	0.0775038	0	0.0475213	0.0845227	0	0.00700697	0.372295	0.024712	0.13677	0.00524921	0.129193	0	0.05	0.0536601	1.08438
TCGA.A8.A08X	0.0174057	0.144288	0.0750936	0.167313	0.0211935	0.0619926	0.0437404	0	0.0102026	0.0866074	0.0797709	0.189241	0.0116491	0.0404635	0.0104454	0.05	0.249747	0.982229
TCGA.A8.A08Z	0.00792019	0.000344977	0.0194456	0.202495	0.0139069	0.000750077	0.0284874	0	0.063268	0.323778	0.0262017	0.137836	0.017449	0.102221	0.00553207	0.02	0.253105	0.987493
TCGA.A8.A091	0.0984325	0.0149515	0.0908554	0.157941	0.00878064	0.0206167	0.0173699	0	0	0.137517	0.0644989	0.237398	0	0.144039	0	0.07	0.149925	1.01956
TCGA.A8.A092	0.046481	0.00739014	0.0171856	0.125927	0	0.0533802	0.041686	0.0127764	0	0.161623	0.12052	0.298386	0.0107366	0.101866	0.00204238	0	0.183632	1.01459
TCGA.A8.A093	0.152791	0.0318662	0.0178086	0.139439	0	0.028742	0.0612902	0	0.00797882	0.229199	0	0.0672441	0.0530458	0.209911	0.000685153	0.01	0.230479	0.991137
TCGA.A8.A095	0.0512616	0	0.116045	0.160093	0	0.051026	0.0606215	0.0201906	0.00632917	0.181021	0.0650669	0.102245	0.0161645	0.169935	0	0.04	0.102808	1.04257
TCGA.A8.A097	0.068106	0.00642103	0.0475345	0.150386	0	0.0410691	0.0250009	0.001638	0	0.313931	0.0795246	0.183962	0	0.0771962	0.00523013	0.09	0.222661	1.00303
TCGA.A8.A099	0.0223031	0.00577486	0.0285338	0.291508	0	0.0581353	0.0605898	0.00292914	0.0248329	0.0285367	0.0970171	0.288213	0.0297969	0.0618295	0	0.04	0.12413	1.03779
TCGA.A8.A09A	0.084343	0.0180212	0.140001	0.19386	0	0.0249686	0.0533124	0.00210746	0.00328896	0.0773657	0.126914	0.135719	0.0353198	0.104779	0	0	0.233368	0.990164
TCGA.A8.A09B	0.0456273	0.0158886	0.0793079	0.212306	0	0.041818	0.00554288	0.0154832	0.0687515	0.027708	0.0805472	0.222529	0.0308517	0.140532	0.00315355	0.05	0.112269	1.03061
TCGA.A8.A09C	0.040006	0.0172687	0.0214714	0.187003	0	0.0571122	0.0293942	0.00427527	0.022927	0.118077	0.0876446	0.202858	0.0565976	0.132371	0.000272093	0.01	0.126531	1.02684
TCGA.A8.A09D	0.0318386	0.00361895	0.0354281	0.129156	0.00615823	0.0201551	0.034437	0	0	0.305464	0.0606776	0.292268	0.00715508	0.0461713	0.0066813	0.02	0.293124	0.97484
TCGA.A8.A09E	0.0228631	0.0049327	0.110461	0.140846	0	0.043894	0.0734045	0	0.015784	0.168619	0.115245	0.115027	0.0209871	0.163746	0.00419092	0.07	0.112766	1.04026
TCGA.A8.A09I	0.057724	0.00886875	0.114905	0.0988699	0.0767819	0.0642624	0.0204473	0.0271897	0.00586157	0.0537599	0.084782	0.27302	0.0353	0.0151943	0.0147046	0.05	0.133303	1.02797
TCGA.A8.A09K	0.0132062	0.0126827	0.268614	0.0166645	0.0199044	0.0979156	0.0480062	0.000740782	0.0154903	0.101934	0.0917981	0.105689	0.026551	0.180804	0	0	0.0688486	1.05911
TCGA.A8.A09M	0.0573675	0.0141359	0.175007	0.14287	0.0154475	0.0764582	0.0894695	0	0	0.0342738	0.0954329	0.257039	0.0212798	0.0171972	0.00402175	0.01	0.103805	1.05151
TCGA.A8.A09N	0.0370452	0.00570418	0.158308	0.0822513	0	0.0832083	0.0909873	0.0515675	0.00403803	0.0492937	0.143515	0.154845	0.0217995	0.117437	0	0.05	0.0850579	1.05898
TCGA.A8.A09Q	0.0693292	0.0106239	0.0117118	0.240926	0.019995	0.0584373	0.0375785	0	0.00106117	0.131949	0.0697065	0.238673	0.00974224	0.0841899	0.00714105	0.02	0.0866179	1.04627
TCGA.A8.A09R	0.128834	0.0251631	0.0655616	0.0537633	0.00214049	0.0607136	0.0659934	0.0109427	0	0.228215	0.100797	0.187184	0	0.0271472	0.00873949	0.07	0.33444	0.94756
TCGA.A8.A09T	0.00886454	0.00440104	0.0591015	0.128332	0	0.0302087	0.031763	0.00737608	0.140933	0.116928	0.0828994	0.327754	0.0156042	0	0.0192882	0.01	0.18297	1.01694
TCGA.A8.A09V	0.124859	0.0445893	0.0632293	0.0807068	0	0.00275304	0.000147359	0.00611631	0.102382	0	0.0635676	0.249734	0.00718366	0.244128	0.0106053	0.01	0.222357	0.99121
TCGA.A8.A09W	0.10331	0.00545275	0.0906244	0.15493	0.0225598	0.028798	0.0275054	0	0.0843238	0	0.0474826	0.239854	0.0204535	0.174706	0	0.02	0.167765	1.0082
TCGA.A8.A09X	0.0712684	0.0163373	0.126127	0.167959	0.0294838	0.0671392	0.0777732	0.0228665	0.018172	0.0412309	0.0995277	0.123201	0.0289529	0.105777	0.00418398	0.03	0.116107	1.03804
TCGA.A8.A0A1	0.00776274	0.000616615	0.0259316	0.0722844	0.0178169	0.0737959	0.0650451	0	0	0.453791	0.0856713	0.115427	0.00582027	0.0686021	0	0.04	0.665308	0.758859
TCGA.A8.A0A2	0.0280398	0.0673696	0.164135	0.225834	0	0.0521727	0.0256104	0	0.0801268	0	0.0778222	0.198915	0.00971431	0.0682441	0	0.02	0.143721	1.027
TCGA.A8.A0A4	0.0522176	0.00941453	0.120759	0.137313	0	0.107518	0.0147443	0.0191751	0.000755342	0.0288191	0.0995936	0.200736	0.0323993	0.176555	0	0.06	0.0943291	1.04346
TCGA.A8.A0A6	0.0530849	0.0110356	0.183386	0.0847682	0.0240558	0.09032	0.0532366	0.0285604	0.00519319	0.0583384	0.117888	0.141453	0.0422177	0.10351	0.00295141	0.05	0.0917339	1.04889
TCGA.A8.A0A7	0.0814481	0.133414	0.237317	0.02549	0.0416152	0.0551785	0.0596506	0	0.00378355	0.0936845	0.0978533	0.0860299	0.0142851	0.059032	0.000488104	0.03	0.327663	0.9516
TCGA.A8.A0A9	0.0268595	0.0162873	0.126412	0.164635	0.00672432	0.0333865	0.0422725	0	0	0.216401	0.115301	0.218919	0.00444066	0.0283608	0	0.03	0.353349	0.940522
TCGA.A8.A0AB	0.0954711	0.0992829	0.0243088	0.0275237	0.0143914	0.046628	0.0185059	0	0	0.237176	0	0.212539	0	0.195018	0.00549217	0.07	0.268055	0.979183
TCGA.A8.A0AD	0	0	0.0718918	0.0774531	0.00117537	0	0.0311455	0	0.158535	0.0533549	0.0134793	0.340347	0.00448975	0.19512	0.00221917	0.01	0.260953	0.977798
TCGA.AC.A23C	0.0679046	0.0112553	0.119514	0.209779	0.0201633	0.055344	0.0387492	0	0	0.0482884	0.139825	0.185365	0.0153378	0.05447	0.00467794	0	0.100964	1.05101
TCGA.AC.A23E	0.0103999	0.000770117	0.00781148	0.102653	0	0.0285436	0.00130539	0	0	0.247917	0.02084	0.416691	0	0.141524	0.0167425	0.08	0.517489	0.856013
TCGA.AC.A23G	0.0184712	0.00214974	0.0718272	0	0	0.0393189	0.0846075	0	0	0.465963	0.0440898	0.1353	0.0212916	0.10329	0.00237792	0.09	0.18029	1.04452
TCGA.AC.A2B8	0.052561	0.011032	0.113826	0.218502	0.00427136	0.0251041	0.0290271	0.00345597	0.0834439	0.0589984	0.0957997	0.153873	0.0127251	0.127986	0	0.06	0.242314	0.982306
TCGA.AC.A2BK	0.0701327	0.015021	0.220604	0.167452	0.0400653	0.0522063	0.0307228	0.0210467	0.00482826	0.0207294	0.111378	0.170621	0.00991354	0.065279	0	0.07	0.108373	1.04992
TCGA.AC.A2BM	0.0273868	0.0453406	0.0743821	0.361712	0.0149803	0.0716489	0.013941	0	0.00945079	0.0918912	0.078207	0.125529	0	0.055494	0.00442386	0.03	0.106142	1.05098
TCGA.AC.A2FE	0.0427542	0.00795491	0.240144	0.227617	0.00826771	0.0705772	0.0625243	0.0443448	0.0227625	0.0258564	0.11762	0.0624328	0.017772	0.0445655	0.00480668	0	0.15453	1.04989
TCGA.AC.A2FG	0.087071	0.119985	0.0794042	0.120055	0	0.0388996	0.0115927	0	0	0.0928294	0.0241519	0.125568	0.0863119	0.206325	0.00136397	0.01	0.310052	0.954853
TCGA.AC.A2FK	0.138894	0.123069	0.110575	0.173562	0	0.0520564	0.00635272	0.020045	0.00014476	0.122456	0.043664	0.071023	0.057204	0.0809542	0	0.06	0.354704	0.937621
TCGA.AC.A2FO	0.120219	0.0688767	0.139393	0.321819	0.0358878	0	0.000592058	0	0.00843203	0	0.0808089	0.113519	0.0619096	0.0483016	0.000241733	0.05	0.263817	0.980436
TCGA.AC.A2QI	0.0611432	0	0.141594	0.145543	0.00655826	0.0842884	0.0433177	0	0.0224886	0.129824	0.102466	0.193573	0	0.0692029	0	0.06	0.136631	1.03187
TCGA.AC.A2QJ	0	0.00329463	0.0237049	0.013774	0.00163843	0.0462581	0.0440334	0	0	0.350693	0.0242896	0.414764	0.00955409	0.0317137	0	0.01	0.694855	0.731581
TCGA.AC.A3BB	0.124637	0.0349185	0.136928	0.141385	0.00190257	0.0709389	0.113616	0.0351975	0.00573237	0.0412998	0.0737692	0.0818017	0.0533896	0.0844835	0	0	0.226885	0.995416
TCGA.AC.A3EH	0.0100507	0.00429949	0.0531482	0.0784084	0	0.0446815	0.0359839	0.00505111	0	0.432576	0.0623505	0.1635	0	0.101866	0.00808415	0.01	0.331599	0.962126
TCGA.AC.A3HN	0.0976458	0.0560327	0.0949019	0.101218	0.00151809	0.0565581	0.0373084	0.0080138	0	0.211686	0.0805704	0.102873	0.0304116	0.121263	0	0.03	0.221472	0.992339
TCGA.AC.A3QP	0.140014	0.0463232	0.125809	0.0643868	0	0.0452739	0.0668427	0.0203932	0.10215	0	0.0779542	0.131723	0.0338694	0.143365	0.00189496	0.01	0.261671	0.973214
TCGA.AC.A3QQ	0.215945	0.0231829	0.0787064	0.325176	0	0.00527083	0.0755619	0	0.013399	0.0132196	0.0596488	0.0899225	0.0247626	0.06137	0	0.03	0.265795	0.984132
TCGA.AC.A3TM	0.0574774	0.0783786	0.162139	0.17716	0.00302707	0.0856451	0.0818218	0.0410806	0.0222758	0.0477091	0.0559318	0.117921	0.0201101	0.0462952	0.00192994	0.4	0.198134	1.01113
TCGA.AC.A3TN	0.0624365	0.0152427	0.0920239	0.280547	0	0.0746828	0.0186829	0	0	0.0956895	0.0684843	0.163816	0	0.0947638	0.00955696	0.03	0.170733	1.01711
TCGA.AC.A3W5	0.0593852	0.00236123	0.098184	0.11121	0.0125628	0.0813116	0.0816186	0.0269823	0.000780704	0.272964	0.109975	0.0594659	0.0242027	0.0589963	0	0.08	0.0890083	1.05912
TCGA.AC.A3W6	0.0442692	0.00242707	0.155099	0.234581	0	0.0471168	0.0886331	0.0105645	0.0145575	0.0140283	0.133886	0.0963393	0.0339075	0.12459	0	0.01	0.167825	1.02872
TCGA.AC.A3W7	0.0389953	0.0123287	0.135119	0.256616	0	0.0707545	0.0349819	0	0.00708072	0.022324	0.0685743	0.158286	0.0496356	0.107928	0.0143306	0.05	0.110495	1.042
TCGA.AC.A3YI	0.0752737	0.0324206	0.0908096	0.0493672	0.00262174	0.0201612	0.0222063	0.0188028	0.0243878	0.362375	0.043774	0.0867382	0	0.113454	5.98995e-05	0.03	0.144793	1.03755
TCGA.AC.A3YJ	0.034525	0.00783547	0.069264	0.0735662	0	0.0570134	0.0404822	0.0178956	0.0186652	0.061755	0.0411775	0.454274	0.0668047	0.0567417	0	0.03	0.206504	1.00532
TCGA.AC.A4ZE	0.0517548	0.0242224	0.155018	0.244723	0	0.0414957	0.051319	0.017787	0.0462167	0	0.0668884	0.160918	0.000476853	0.13918	0	0.02	0.174441	1.01677
TCGA.AC.A5EH	0	0.00136455	0.0109001	0.133984	0	0.0957693	0.0302552	0.0102906	0	0.345094	0.0736705	0.202225	0	0.0770863	0.00271229	0.01	0.625204	0.791888
TCGA.AC.A5XS	0.0743126	0	0.140875	0.158867	0.0147837	0.0769424	0.0375971	0.0373643	0.0266799	0	0.0956625	0.211135	0.018209	0.034171	0.0313305	0.04	0.088199	1.05196
TCGA.AC.A5XU	0	0.0826263	0.114261	0.150713	0	0.0475178	0.0385366	0.00716638	0	0.29871	0.0612034	0.139029	0.00383205	0.0407744	0.00394867	0.04	0.15077	1.03373
TCGA.AC.A62V	0.0058528	0	0.0174422	0.00789488	0.00945	0.0317	0.0530905	0	0	0.384274	0.00583041	0.256959	0.000305585	0.151239	0	0.39	0.333082	0.960691
TCGA.AC.A62X	0.003405	5.75241e-05	0.027216	0	0	0.192	0	0.0718449	0.033621	0.172449	0.0650635	0	0	0.0482768	0.0177973	0.02	0.115843	1.0718
TCGA.AC.A62Y	0.0114305	0	0.0234981	0.0158492	0.024057	0.0485554	0.0552027	0	0	0.413638	0.0595606	0.200703	0.013591	0	0	0.07	0.394867	0.929113
TCGA.AC.A6IV	0.0754637	0.00958152	0.087189	0.25299	0.006539	0.0383538	0.0262757	0.0122942	0.0119351	0.101198	0.0774176	0.163871	0.00525356	0.121751	0.00988702	0.05	0.175386	1.01112
TCGA.AC.A6IW	0.0223686	0	0.139038	0.0575285	0.0484041	0.162662	0.0711784	0.0132671	0.0498771	0.00907585	0.138799	0.116491	0.157154	0.0141558	0	0.04	0.096405	1.05319
TCGA.AC.A6IX	0.100395	0.0633417	0.110955	0.127973	0	0.0620088	0.0448134	0.00463405	0.0312679	0	0.0817297	0.203999	0.0258714	0.0994809	0	0.07	0.231701	0.986185
TCGA.AC.A6NO	0.113206	0.00950875	0.117483	0.121534	0	0.114177	0.052157	0	0.0267254	0.153296	0.102432	0.0723797	0.0518145	0.0652855	0	0.05	0.15084	1.02406
TCGA.AC.A7VB	0.0563237	0.039508	0.0992627	0	0	0.0169647	0.0756247	0.0303654	0	0.292294	0.075263	0.225465	0	0.0854351	0.00349419	0.15	0.0458312	1.07908
TCGA.AC.A7VC	0.0158351	0.00341117	0	0.0954592	0.0314455	0.034108	0.0238857	0	0.0162012	0.550563	0.0179994	0.134361	0.0284081	0.00886636	0	0	0.745719	0.68445
TCGA.AC.A8OP	0.128527	0.0112594	0.0728004	0.12841	0	0.117734	0.0384909	0.0209035	0.0033675	0.143833	0.0952722	0.141935	0	0.0830006	0	0.35	0.223821	0.993085
TCGA.AC.A8OQ	0.00714185	0.0453837	0.121192	0.154018	0	0.110082	0.104171	0.0123852	0.0262987	0.141049	0.107366	0.0852397	0.00796715	0.00930561	0	0	0.144144	1.03727
TCGA.AC.A8OR	0.00263912	0	0	0.063237	0	0.0116629	0.0667895	0	0	0.436758	0.0102123	0.292422	0.00501161	0.0707959	0	0.13	0.260216	1.01245
TCGA.AC.A8OS	0.0718835	0.00760036	0.113685	0.207863	0.0117838	0.0494499	0.0272256	0	0.0203753	0.0476201	0.0905954	0.0997712	0.011883	0.223066	0	0.05	0.136127	1.02947
TCGA.AN.A03X	0.0226822	0.00688838	0.0372327	0.188368	0	0.0397744	0	0.00987353	0.0899849	0	0.0763055	0.250797	0.0100365	0.205699	0.0183496	0.03	0.220715	0.989996
TCGA.AN.A03Y	0.0357862	0.00658526	0.207915	0.122361	0.00832241	0.120738	0.061692	0	0.0121594	0.0430019	0.129246	0.155951	0.0144579	0.0758538	0.000609993	0.04	0.115854	1.05061
TCGA.AN.A041	0.0173095	0.0237326	0.00831593	0.151173	0	0.0413795	0.0528491	0.0264682	0.0114122	0.294979	0.0616489	0.216382	0.0110641	0.0831814	0.000104588	0.02	0.106074	1.05323
TCGA.AN.A046	0.0309678	0.00745819	0.237881	0.149594	0.0648439	0.115842	0.0565456	0.00924078	0.00611478	0.036508	0.12163	0.105986	0.0402023	0.0171853	0	0	0.408451	0.915562
TCGA.AN.A049	0.0690891	0.00983379	0.0838064	0.211106	0.000878372	0.0473326	0.0312197	0	0	0.17106	0.127554	0.1577	0.0291686	0.0477453	0.00462385	0.01	0.182031	1.0149
TCGA.AN.A04A	0.0687271	0.0110565	0.0629986	0.216389	0.0190839	0.00852553	0.0197551	0	0	0.258605	0.0828338	0.177771	0.0191285	0.0436983	0	0.01	0.106531	1.04869
TCGA.AN.A04C	0.0378076	0.000338161	0.0766562	0.273784	0	0.117078	0.0372358	0.0267093	0.00833335	0.060092	0.0916115	0.200884	0.0155542	0.0257457	0	0	0.0371447	1.08259
TCGA.AN.A04D	0.147236	0.0370707	0.0463547	0.0552601	0	0.189004	0	0.0356607	0.0101515	0.177406	0.0513509	0.173224	0.016211	0.0241593	0	0.01	0.21054	0.99942
TCGA.AN.A0AJ	0.0262301	0.000788407	0.172326	0.0493283	0.0880303	0.0652514	0.0463251	0	0	0.23346	0.108145	0.134757	0.0274165	0.0465897	0	0.05	0.114022	1.04481
TCGA.AN.A0AK	0.0522664	0.0336646	0.0979164	0.0755718	0.0490866	0.0717314	0.037299	0.00116663	0	0.239035	0.0587972	0.282011	0	0	0	0.03	0.136831	1.03914
TCGA.AN.A0AL	0.153236	0.0425871	0.0357048	0.211808	0.017513	0.0567122	0.0256784	0	0	0.199179	0.0938635	0.0757991	0	0.034278	0.00035687	0	0.228472	0.99443
TCGA.AN.A0AM	0.0344599	0.00516812	0.1236	0.1228	0.0392925	0.130141	0.0670692	0.0133148	0	0.0730167	0.143152	0.160764	0.0237592	0.0260033	0.0122859	0.01	0.0580652	1.07461
TCGA.AN.A0AR	0.0604762	0	0.0489575	0.162101	0	0.033685	0.108615	0.0167014	0.00807804	0.134683	0.0660509	0.14953	0.170882	0.0402403	0	0.02	0.101087	1.0409
TCGA.AN.A0AS	0.00700034	0	0.00825059	0	0.0115419	0.0398981	0.080287	0	0	0.652854	0.00989322	0.0456995	0.00428708	0.107925	0.000731886	0.12	0.516779	0.865059
TCGA.AN.A0AT	0.0616333	0.00477937	0.067443	0.188108	0.043558	0.087066	0.0355723	0	0	0.273048	0.114324	0.107657	0	0	0	0.04	0.0824548	1.06732
TCGA.AN.A0FD	0.0687624	0.00968113	0.140851	0.066166	0.0154439	0.102502	0.055255	0	0	0.265734	0.0885955	0.144889	0.00735707	0.0230905	0.0043156	0.05	0.108227	1.05142
TCGA.AN.A0FF	0.0747165	0.0221827	0.0658392	0.126217	0.013114	0.0543532	0.104842	0	0.00650702	0.162475	0.106819	0.212687	0.0175233	0	0	0.03	0.230199	0.993785
TCGA.AN.A0FJ	0.0734847	0.00271943	0.0807705	0.141069	0.0121524	0.0714475	0.0521856	0	0	0.287953	0.107159	0.0576538	0.049576	0.0137569	0	0.09	0.22374	1.00124
TCGA.AN.A0FK	0.0748058	0.0454493	0.0680448	0.0226058	0	0.0533199	0.0620826	0.00484677	0	0.304634	0.12588	0.158893	0.00309542	0.0654394	0.000666014	0.07	0.139191	1.04169
TCGA.AN.A0FL	0.0576158	0.00361568	0.00455873	0.197359	0	0.0418492	0.0334541	0	0.000571243	0.406392	0.0598848	0.15363	0	0.015669	0.000649398	0.01	0.243564	1.00496
TCGA.AN.A0FN	0.091984	0	0.117947	0.268528	0.0138201	0.111157	0.0159719	0.00766596	0	0.057714	0.100618	0.0910055	0.0286916	0.0540236	0.000677233	0.06	0.117415	1.05114
TCGA.AN.A0FS	0.0764749	0.0302751	0.0253853	0.149262	0	0.026201	0.000271753	0.0236368	0	0	0.0338827	0.331796	0.00564011	0.288274	0	0.06	0.148925	1.02577
TCGA.AN.A0FT	0.00638093	0.000267864	0.125497	0.0951929	0	0.0439721	0.0106187	0.06817	0.00562601	0.151309	0.151067	0.206717	0.0451834	0.0856579	0.00434086	0.05	0.192025	1.01452
TCGA.AN.A0FV	0.0521136	0.00716754	0.00150368	0.0375766	0	0.0369843	0.0327027	0.00749116	0	0.396823	0.0673404	0.30041	0	0.0577432	0.0021444	0.01	0.507448	0.86237
TCGA.AN.A0FW	0.0659295	0.00447639	0.185573	0.147048	0.041178	0.0400577	0.074473	0	0.0238565	0	0.0676463	0.194576	0.0793438	0.0723141	0	0	0.121491	1.03367
TCGA.AN.A0FX	0.118333	0.00670193	0.066207	0.130276	0	0.0674609	0.0497457	0	0	0.275836	0.116291	0.0913327	0	0.0565809	0	0.05	0.169035	1.02375
TCGA.AN.A0FY	0.0723689	0.00377451	0.057006	0.113041	0.0118044	0.0513581	0.0396449	0	0	0.314176	0.111319	0.175509	0.0105713	0.0318753	0	0.06	0.233094	1.00089
TCGA.AN.A0FZ	0.0683843	0.0130662	0.0494587	0.0633113	0	0.0338791	0.0486011	0	0	0.393393	0.0498527	0.237084	0.002433	0.0136169	0.0107384	0	0.194893	1.03228
TCGA.AN.A0G0	0.0141681	0.0069596	0.0277223	0.130864	0.0421358	0.111283	0.0120673	0	0	0.290139	0.0959371	0.166793	0.00650906	0.0115066	0.00433683	0.03	0.0222529	1.09239
TCGA.AN.A0XL	0.0329895	0.0188624	0.0435755	0.198109	0	0.0270156	0.000455729	0.00868044	0.0157179	0.0217651	0.103843	0.268142	0.00757622	0.247084	0.00150509	0.02	0.141481	1.02607
TCGA.AN.A0XN	0.0134553	0.000866264	0.0114841	0.149893	0	0.0515209	0.0300343	0	0	0.424741	0.0696023	0.187979	0	0	0.00409383	0.03	0.402675	0.925028
TCGA.AN.A0XO	0.0451727	0.010286	0	0.113534	0	0.0709119	0.0308636	0.0252276	0	0.324333	0.00803819	0.0648681	0.0869946	0.116762	0.0339394	0	0.297474	0.965072
TCGA.AN.A0XP	0.0417907	0.0155393	0.0121391	0.155978	0	0.0467085	0.0174194	0	0	0.0762537	0.0620431	0.356016	0	0.096746	0.0735337	0.07	0.136529	1.02765
TCGA.AN.A0XR	0.0184014	0.00557104	0.0264321	0.0751894	0	0.0529965	0.0352106	0.0055238	0	0.367622	0.0675468	0.117493	0.143401	0.0800662	0.00276547	0	0.14162	1.04804
TCGA.AN.A0XS	0.0214826	0.0268904	0.181202	0.221191	0	0.0696578	0.0839834	0.0106153	0.0208582	0.0593882	0.109843	0.0675132	0.0339724	0.0588365	0.0102941	0.02	0.101561	1.05881
TCGA.AN.A0XT	0.0942678	0.0247609	0.137005	0.199038	0	0.0377886	0.00962428	0	0.0382582	0.0457048	0.127439	0.0857003	0.0178528	0.18097	0	0.04	0.161648	1.01983
TCGA.AN.A0XU	0.0433196	0.0205877	0.133747	0	0.075604	0.0957874	0.0224853	0.0312177	0	0.214348	0.114013	0.16014	0.0520334	0.021623	0	0.15	0.0937835	1.05106
TCGA.AN.A0XV	0.0991407	0.00518308	0.0707247	0.22519	0	0.106781	0.0181449	0.0145409	0	0.0671891	0.121973	0.0986467	0.0491723	0.0750895	0	0.08	0.122913	1.03913
TCGA.AN.A0XW	0.0378952	0.0149685	0.1037	0.151817	0.0325167	0.090559	0.0503235	0.0405901	0.00892574	0.083751	0.118436	0.171117	0.011831	0.0682792	0	0.04	0.102072	1.04677
TCGA.AO.A03L	0.0989733	0.0809936	0.0785439	0.260069	0	0.0641082	0.0284705	0	0.042217	0.0162283	0.14794	0.0839305	0.0076013	0.0834757	0	0.03	0.239255	0.993676
TCGA.AO.A03M	0.165923	0.0914299	0.110928	0.13294	0.0339269	0.0730983	0.0449865	0.00145252	0.00491339	0.0400376	0.102414	0.0958157	0.031495	0.0706404	0	0.01	0.376779	0.927731
TCGA.AO.A03N	0.0470535	0.00525721	0.035784	0.0751051	0	0.101194	0.0511646	0	0	0.427936	0	0.108242	0	0.0743291	0	0.02	0.292308	0.978322
TCGA.AO.A03O	0.0414887	0.0243202	0.0889672	0.146842	0.0777886	0.0890802	0.0678582	0	0	0.141594	0.0964959	0.180711	0.00760055	0.0279525	0	0.03	0.119469	1.03851
TCGA.AO.A03P	0.0650313	0.0121533	0.0449491	0.124326	0.00323669	0.0964597	0.052924	0.01086	0	0.282632	0.0372925	0.203868	0	0.05734	0	0.02	0.0894779	1.05857
TCGA.AO.A03R	0.103936	0.0336702	0.149218	0.0930628	0	0.17652	0.0884844	0.0647536	0.012141	0.0213149	0.0791846	0.0818894	0.0268206	0.0285349	0.0051692	0.05	0.166605	1.03424
TCGA.AO.A03T	0.0594239	0.00960573	0.0802653	0.165582	0.000217308	0.0526101	0.0791354	0.0803352	0	0.186473	0.114292	0.0918644	0.0123885	0.0678079	0	0.05	0.157747	1.02764
TCGA.AO.A03U	0.00808585	0.000618555	0.0572666	0.137655	0	0.00208084	0.0140658	0.142581	0.105071	0.0397567	0.0244392	0.224015	0.0510534	0.134796	0	0.01	0.119875	1.04073
TCGA.AO.A03V	0.24144	0.068078	0.114239	0.17846	0	0.0476531	0.030417	0	0.0188277	0.0650022	0.12956	0.0435843	0.0230563	0.0311029	0	0.01	0.356077	0.942565
TCGA.AO.A0J2	0.0532173	0.0298299	0.156692	0.0428582	0.088125	0.127281	0.012678	0.0891211	0.0195321	0.0920046	0.127892	0.0744121	0.0246272	0.0531678	0	0.07	0.200842	1.00828
TCGA.AO.A0J3	0.0424985	0.00930588	0.131901	0.127528	0	0.0612321	0.0415582	0.0380051	0.00552506	0.0847352	0.0854514	0.213765	0.0236094	0.134885	0	0.01	0.124994	1.03073
TCGA.AO.A0J4	0.136444	0.0552899	0.0874414	0.200052	0.0211183	0.0712486	0.0738696	0	0	0.136041	0.120043	0.0682899	0.00752091	0	0	0.06	0.24671	0.992244
TCGA.AO.A0J5	0.116467	0.0186091	0.12526	0.149665	0.0113861	0.0216992	0.0472399	0	0.0138069	0.171743	0.050293	0.185185	0.000406692	0.0882378	0	0.04	0.190825	1.00521
TCGA.AO.A0J6	0.0395637	0.00599664	0.105473	0.137775	0.0220672	0.180164	0.0258197	0.105545	0.00790616	0.0937212	0.101203	0.0458766	0.00344708	0	0.0208229	0.06	0.127855	1.05607
TCGA.AO.A0J7	0.0888237	0.000376246	0.0508032	0.122963	0.0384579	0.0145882	0.0864229	0	0.0147147	0.253821	0.0567437	0.00765181	0.0787356	0.145624	0	0.09	0.148356	1.0204
TCGA.AO.A0J8	0.0368571	0.000451054	0.0216587	0.0773517	0	0.0608688	0.10551	0.00425327	0	0.443153	0.0861511	0.019693	0.012963	0.117064	0	0.02	0.165546	1.04115
TCGA.AO.A0J9	0.0637675	0.00662634	0.147836	0.124939	0	0.0369599	0.09579	0.0314039	0.00992499	0.128354	0.0676278	0.154405	0.0502937	0.0804736	0.00119	0.02	0.162868	1.0172
TCGA.AO.A0JA	0.12115	0.0608238	0.0531403	0.222639	0.00246389	0.0310814	0.0393839	0	0	0.0152689	0.0971157	0.25358	0.0183647	0.077013	0.00566238	0.05	0.240762	0.984942
TCGA.AO.A0JB	0.0937343	0.0020866	0.121391	0.140689	0	0.0664402	0.149757	0	0.0175958	0.108974	0.067677	0.176373	0.00225325	0.0487767	0.00425246	0.04	0.109348	1.04615
TCGA.AO.A0JC	0.321455	0.0414595	0.217871	0.0064392	0.0623436	0.0839916	0.111836	0.00193478	0	0.039328	0.039901	0.0455844	0	0.0278558	0	0.06	0.444262	0.899073
TCGA.AO.A0JD	0.0504518	0.00438348	0.147675	0.0835659	0.0497898	0.102043	0.0319787	0	0.0215753	0.07556	0.134247	0.16226	0.073578	0.0604603	0	0.02	0.119806	1.03552
TCGA.AO.A0JE	0.0584493	0.0301517	0.198145	0.0786185	0.0630127	0.0642651	0.0897708	0	0.0300126	0.0164703	0.121114	0.133748	0.00969039	0.0487474	0.00198833	0.04	0.146488	1.0315
TCGA.AO.A0JF	0.0436493	0.00621914	0.123922	0.172275	0.00762346	0.0154966	0.0280409	0.00150407	0.0259211	0.0164041	0.0780803	0.138648	0.127278	0.214939	0	0.04	0.261989	0.973085
TCGA.AO.A0JG	0.0911723	0.00736448	0.259229	0.158826	0	0.0665494	0.0444247	0.00826881	0.0237064	0.0542791	0.0886587	0.101794	0.0109226	0.0848046	0	0.04	0.17695	1.02279
TCGA.AO.A0JI	0.103172	0.0155326	0.111639	0.124252	0	0.0194766	0.00693571	0.0455496	0	0.0154657	0.0575869	0.04744	0.00204237	0.450908	0	0.07	0.305758	0.972631
TCGA.AO.A0JJ	0.0593229	0	0.112257	0.179254	0	0.105003	0.0564138	0.014443	0.0433849	0	0.0982065	0.156097	0.0293396	0.121654	0.00362963	0	0.0700999	1.05797
TCGA.AO.A0JL	0.111059	0.0143777	0.104821	0.0308298	0	0.125921	0.0395555	0.0649014	0	0.280306	0.0546176	0.135594	0	0.0380174	0	0.04	0.19803	1.01095
TCGA.AO.A0JM	0.0788856	0.00855792	0.0392337	0.0052552	0.0164338	0.0533384	0.0800804	0	0	0.438684	0.0858372	0.136436	0.00175815	0.0273237	0	0.01	0.259791	0.999518
TCGA.AO.A124	0.12625	0.011198	0.0927093	0.0603805	0.0195784	0.108295	0.053148	0	0.010215	0.189843	0.0239938	0.101535	0	0	0.00418221	0.07	0.224696	0.993214
TCGA.AO.A125	6.15774e-05	0	0	0.0464842	0	0.155957	0	0.0387709	0	0.273444	0.00348158	0.295495	0	0.0593081	0.000884707	0.01	0.0683963	1.07948
TCGA.AO.A126	0.0562059	0.00802816	0.128736	0.255896	0.00595494	0.108911	0.0301749	0	0.011995	0	0.0792998	0.175642	0.00668661	0.130911	0	0.01	0.195483	1.01114
TCGA.AO.A128	0.0205702	0.00409255	0.251377	0.0495321	0.127158	0.0786625	0.0216323	0.0305307	0.00285956	0.0518067	0.157879	0.130936	0.00387775	0.0644405	0.00464514	0	0.177104	1.02519
TCGA.AO.A129	0.166732	0.0656747	0.0994109	0.158869	0.0126205	0.0779985	0.0526852	0.0381227	0.0175036	0.102519	0.124004	0.0704386	0.00115201	0.0122693	0	0.01	0.279396	0.977157
TCGA.AO.A12A	0.194093	0.0310925	0.0933214	0.220269	0	0.0557539	0.0462008	0	0.00109753	0.00509545	0.127814	0.120098	0.0564651	0.0487	0	0.03	0.279061	0.975476
TCGA.AO.A12B	0	0.00255122	0.0716397	0.155768	0	0.0144433	0.121188	0	0.0426919	0.180727	0.0412324	0.0863143	0.0196708	0.180868	0	0.02	0.0361672	1.06672
TCGA.AO.A12C	0.195112	0.125013	0	0.060593	0	0	0.0315078	0	0	0.297597	0.0413679	0.153833	0	0.0854576	0	0.05	0.389317	0.926978
TCGA.AO.A12D	0.0123421	0.0244756	0.0387777	0.271194	0.0234107	0.0938607	0.070112	0	0.0116165	0.0599348	0.096062	0.18164	0.0148732	0.0370511	0	0.02	0.0447296	1.07473
TCGA.AO.A12E	0.0472051	0.00948332	0.0355581	0.184086	0	0.0226281	0	0	0.145899	0.0196454	0.0523546	0.24428	0	0.21943	0	0.01	0.0998399	1.03668
TCGA.AO.A12F	0.100116	0.00948104	0.0468443	0.0943452	0	0.0576724	0	0.00993517	0.00326243	0.110813	0	0.316405	0.0195662	0.110151	0.0285944	0	0.150303	1.01928
TCGA.AO.A12G	0.0865424	0.0616699	0.118155	0.106506	0	0.0615185	0.0484371	0.0193641	0.0325169	0	0.141664	0.151175	0.0201652	0.150081	0.000878002	0.06	0.242765	0.985283
TCGA.AO.A12H	0.000274869	0	0.0332527	0.0889653	0	0.0302236	0.00886624	0.0197611	0	0.229828	0.0176191	0.379161	0	0.169005	0.00865566	0.07	0.0834286	1.07194
TCGA.AO.A1KO	0.0149792	0.0361045	0.0898318	0.450507	0	0.0109418	0	0.0193995	0.0018087	0.0431773	0.0158122	0.240517	0.00313701	0.0205658	0	0.49	0.0636364	1.07566
TCGA.AO.A1KP	0.0951904	0.0290692	0.0187566	0.281254	0	0.175939	0	0.0154398	0	0.0178169	0.0942092	0.10845	0.0428615	0.0405952	0.0119792	0	0.12931	1.03897
TCGA.AO.A1KQ	0.109621	0.058941	0.155015	0.117173	0.0152494	0.0873133	0.0608712	0	0.00199846	0.150716	0.0958087	0.0934375	0.00776346	0.0147614	0	0	0.24505	0.989478
TCGA.AO.A1KR	0.0157493	0	0.32743	0	0.0526591	0.146612	0.0708369	0.126418	0.0412327	0.0600556	0.102358	0.019557	0.00612309	0	0	0.01	0.0701822	1.10871
TCGA.AO.A1KS	0.086299	0.0155029	0.0297823	0.341718	0.0209538	0.0667707	0.00156439	0	0.0115964	0	0.0869327	0.222676	0.0192757	0.053045	0.00286147	0.01	0.217678	0.997137
TCGA.AO.A1KT	0.0149713	0	0.0359794	0.239453	0	0.0552619	0.0306253	0	0	0.286703	0.0157618	0.191902	0	0.0612706	0.00908375	0	0.0672784	1.07198
TCGA.AQ.A04H	0.0660208	0.0103608	0.0319286	0.162966	0.0171247	0.0387469	0.0439126	0	0	0.208951	0.107591	0.193981	0	0.0904882	0	0.04	0.232472	0.990586
TCGA.AQ.A04J	0.239718	0.0486277	0.0778206	0.226068	0.0722938	0.0221493	0.0176559	0	0.00248594	0.110349	0.0745463	0.0502796	0.00948074	0.0230702	0	0.01	0.349335	0.942334
TCGA.AQ.A04L	0.053219	0.000752534	0.00811479	0.0810316	0	0.120646	0.0147689	0	0	0.398883	0.0648623	0.233144	0	0.0160628	0.00851505	0.05	0.076562	1.09364
TCGA.AQ.A0Y5	0	5.92333e-05	0.00487097	0.015994	0	0.022511	0.0140244	0	0	0.442882	0.0611817	0.368749	0	0.040978	0.0198738	0.01	0.641526	0.767606
TCGA.AQ.A1H2	0	0	0.0431616	0.151359	0	0.0266456	0.048304	0	0.13441	0.00339552	0.09224	0.396876	0	0.0475524	0.00788626	0.01	0.179082	1.01557
TCGA.AQ.A1H3	0.0909227	0.00627201	0.117427	0.284253	0	0.0907135	0.001601	0.00638953	0.0107257	0.0329762	0.0985552	0.106725	0.0982424	0.0372051	0	0.01	0.138503	1.03503
TCGA.AQ.A54N	0.0504739	0.0296405	0.141362	0.138603	0	0.245176	0.0303551	0.0203767	0.0433448	0.0644164	0.0852843	0.122175	0	0.0161711	0	0.03	0.10208	1.06127
TCGA.AQ.A54O	0.15221	0.0456561	0.0741331	0	0	0.145832	0.073913	0.018294	0	0.236385	0.0725087	0.088422	0.0440598	0.048201	0.000384529	0.01	0.294811	0.964624
TCGA.AQ.A7U7	0.0832579	0.00121945	0.12755	0.217546	0.0122796	0.160081	0.0578306	0.00321097	0.00298682	0.030928	0.108411	0.10663	0.0274941	0.055159	0.0054168	0.05	0.100019	1.06246
TCGA.AR.A0TP	0	0	0.0206672	0.00613248	0	0.0140502	0.0267619	0	0	0.691149	0	0.148219	0	0.0281769	0	0.11	0.441276	0.935282
TCGA.AR.A0TQ	0.160219	0.0691727	0.0977775	0.142002	0.012958	0.0386973	0.0590687	0.0102185	0	0.187377	0.0889127	0.120221	0.0038039	0.00957138	0	0.04	0.306517	0.961445
TCGA.AR.A0TR	0.183055	0	0.173479	0.103892	0.0117131	0.0210805	0.126646	0	0.0221089	0.0280412	0.0905169	0.113871	0.0252684	0.092968	0.00736033	0.01	0.234939	0.991412
TCGA.AR.A0TS	0.235977	0.0327919	0.0904296	0.179811	0.044185	0.0499954	0.044373	0	0	0.0828934	0.101873	0.112531	0	0.0179544	0	0.06	0.347055	0.943782
TCGA.AR.A0TT	0.140697	0.0937334	0.0798424	0.167957	0.0286382	0.0627343	0.0568076	0.000539116	0.00518896	0.14233	0.10098	0.0791214	0.00566331	0.0326027	0.00316379	0.07	0.309921	0.959475
TCGA.AR.A0TU	0.00674868	0.00633245	0.159601	0	0.131484	0.114678	0.0253371	0.0370389	0.00511982	0.107789	0.0952322	0.137004	0.0295274	0.0251693	0	0.01	0.215911	1.00025
TCGA.AR.A0TV	0.0295074	0.00615202	0.123301	0.115365	0.0472766	0.0928732	0.0545487	0.00724496	0.00506885	0.240779	0.108445	0.121802	0.0117806	0.0358544	0	0.06	0.0685258	1.06758
TCGA.AR.A0TW	0.0181353	0.049551	0.218002	0.0294201	0.110081	0.0620401	0.0159264	0	0.0139411	0.0363422	0.109115	0.18404	0.0169425	0.117704	0	0.02	0.129929	1.02686
TCGA.AR.A0TX	0.0682395	0	0.108335	0.133183	0.0484316	0.0686287	0.0713201	0	0.0103769	0.0621771	0.0950369	0.185884	0.0413721	0.0764263	0	0.06	0.113029	1.03514
TCGA.AR.A0TY	0.139177	0	0.0409573	0.143329	0.00283091	0.00611933	0.00277503	0	0	0.355606	0.0273003	0.190733	0	0.0911725	0	0.02	0.207906	1.01472
TCGA.AR.A0TZ	0.0574296	0.00954234	0.0403595	0.238318	0	0.0806619	0.0134822	0.00474372	0.0512821	0.086431	0.0741614	0.243644	0.0199114	0.0482968	0.00149792	0.04	0.144286	1.0236
TCGA.AR.A0U0	0.0122815	0.0325683	0.182451	0.019828	0.0785745	0.121435	0.00639199	0	0	0.0870245	0.199226	0.117629	0.0301457	0.0262996	0.000827702	0.01	0.0782354	1.07464
TCGA.AR.A0U2	0.0602859	0.014686	0.20977	0.242314	0.033115	0.0103426	0.0327511	0	0.00334486	0.131208	0.0433058	0.169864	0.0163461	0.0144511	0	0.09	0.120578	1.04653
TCGA.AR.A0U3	0.0538411	0.0121114	0.0427142	0.122111	0.00781603	0.0701438	0.0612354	0.00603949	0	0.299308	0.0879186	0.126103	0.0208409	0.0898171	0	0.04	0.260377	0.98232
TCGA.AR.A0U4	0.0108684	0.0036759	0	0.131027	0.0101228	0.0175361	0.018613	0	0.00664962	0.457389	0.146496	0.0560891	0.0293133	0	0.0251169	0.01	0.152668	1.06565
TCGA.AR.A1AH	0.179783	0.0266932	0.025432	0.228704	0	0.0361454	0.0110444	0	0.00427286	0.192601	0.0483485	0.0997357	0	0	0.00736639	0.03	0.19258	1.0096
TCGA.AR.A1AI	0.0304623	0.0288301	0.181651	0.141064	0.0859869	0.0730101	0.0474219	0	0.013429	0.124659	0.0553389	0.141968	0.0207061	0.0171239	0.00499015	0.08	0.0874132	1.0519
TCGA.AR.A1AJ	0.0592847	0	0.058932	0.209623	0.0615218	0.105349	0.0380315	0	0.00104544	0.0958277	0.128814	0.158292	0.0134248	0.00826183	0.00143868	0.47	0.110189	1.04905
TCGA.AR.A1AK	0.0553827	0.0106709	0.181146	0.137322	0.0175692	0.118551	0.0207391	0.0108046	0.0696092	0	0.108332	0.18243	0.0142657	0.071657	0.00152083	0.07	0.18811	1.01076
TCGA.AR.A1AL	0.100916	0.00686232	0.0838768	0.295849	0.0194686	0	0	0	0.0244792	0	0.0275023	0.0815514	0.223588	0.128744	0.0071624	0.41	0.158144	1.01435
TCGA.AR.A1AM	0.0721947	0.0370364	0.0662247	0.188259	0	0.0470851	0.0793081	0.0049318	0.0093538	0.196819	0.085669	0.0856529	0.0208319	0.106634	0	0.13	0.146904	1.02419
TCGA.AR.A1AN	0.0450491	0.00119637	0.0514953	0.115782	0.00926909	0.0163478	0.034417	0	0	0.426788	0.0814938	0.11287	0.0297821	0.0755101	0	0.02	0.643676	0.777002
TCGA.AR.A1AO	0.0243729	0	0.0664523	0	0.00313296	0.0815613	0.0583374	0	0	0.516713	0.060874	0.109456	0.0102417	0.0442931	0	0	0.259507	1.01138
TCGA.AR.A1AP	0.0625949	0.00187478	0.0642913	0.101617	0	0.0440884	0.0682936	0	0.00688879	0.0878302	0.17583	0.242886	0.0559207	0.0810944	0.00678939	0.04	0.162897	1.02497
TCGA.AR.A1AQ	0.0410589	0.0431398	0.171782	0.0574566	0.0960959	0.100309	0.0218436	0	0	0.151089	0.116614	0.117621	0.029701	0.0310521	0.00017317	0.01	0.120205	1.03744
TCGA.AR.A1AR	0.016449	0.00362171	0.0195592	0.174505	0.0306101	0.0325547	0.0141392	0	0	0.37716	0.0867185	0.173808	0	0.00966613	0	0.04	0.387891	0.928567
TCGA.AR.A1AS	0.013745	0	0.025942	0.0425822	0.000691526	0.0241859	0.0305658	0	0	0.481897	0.000974443	0.286131	0	0.0238781	0.00357897	0.01	0.430133	0.917809
TCGA.AR.A1AT	0.0871399	0.0053439	0.0947353	0.170681	0.0155798	0.0786163	0.0492719	0	0.00224532	0.124625	0.105702	0.170353	0.0162194	0.0460781	0	0.01	0.121035	1.03804
TCGA.AR.A1AU	0.083132	0.0550306	0.0522798	0.188739	0	0.0183922	0.0513609	0.0465879	0.0123616	0.080989	0.0867226	0.168241	0.0156999	0.140464	0	0.03	0.202285	0.997367
TCGA.AR.A1AV	0.000464143	0	0	0.135906	0	0.00959486	0.044062	0	0	0.525326	0.0232849	0.120942	0	0.102189	0	0	0.230105	1.02982
TCGA.AR.A1AW	0.102237	0.0789338	0.157995	0.116674	0.0819803	0.0525409	0.0469812	0	0	0.158383	0.0814298	0.102685	0	0.0181027	0	0.07	0.278317	0.972101
TCGA.AR.A1AX	0.122365	0	0.104589	0.272698	0.0293115	0.0536269	0.0780076	0	0.0196577	0.0357041	0.105891	0.039664	0.00567153	0.124745	0	0.01	0.154839	1.03349
TCGA.AR.A1AY	0.0175176	0	0.0127195	0.0391455	0	0.0418437	0.0161927	0.00272001	0	0.626223	0.0993298	0.0965633	0	0.0457714	0	0.03	0.241812	1.05212
TCGA.AR.A24H	0.0538296	0.00939879	0.132905	0.208198	0.0348408	0.115996	0.0240144	0	0.0100255	0.103832	0.0754801	0.200164	0.00760971	0.0237065	0	0.04	0.149673	1.03054
TCGA.AR.A24K	0.156059	0.0674178	0.0539136	0.155834	0	0.0549055	0.0314406	0	0.0477809	0.0661107	0.0328089	0.215178	0.0498121	0	0.00872966	0.02	0.256316	0.978317
TCGA.AR.A24L	0.143114	0.0506932	0.036564	0.118493	0.00168656	0.0334398	0.0342333	0	0	0.230134	0.0480202	0.213299	0.0176675	0.0654721	0.00321852	0	0.259881	0.980278
TCGA.AR.A24M	0.126369	0.0641601	0.00258559	0.071673	0	0.0296532	0.00210236	0	0.0448466	0.124962	0.0443403	0.248084	0	0.190824	0.032269	0.25	0.264763	0.975101
TCGA.AR.A24N	0.0727337	0.0683972	0.0623896	0.227454	0	0.102788	0.022066	0.00955819	0.0231212	0.0531118	0.0821964	0.205341	0	0.0504486	0.00124372	0.02	0.187806	1.00811
TCGA.AR.A24O	0.126042	0.0383023	0.0868787	0.26645	0.00984074	0.0474854	0.00572669	0	0	0.00890349	0.129831	0.152473	0.035121	0.0836746	0.00142837	0.03	0.227662	0.994462
TCGA.AR.A24P	0.149299	0.0748391	0.0531887	0.185698	0.0162438	0.0670056	0.00856868	0	0.0716452	0.0641422	0.0763165	0.150769	0.012159	0.0473927	0	0.07	0.29828	0.960026
TCGA.AR.A24Q	0.0830924	0.0850964	0.138609	0.125262	0.0319335	0.07524	0.0135997	0	0	0.209045	0.0694457	0.112824	0.0149383	0.0168141	0	0.01	0.237787	0.990555
TCGA.AR.A24R	0.0761555	0.0130087	0.016154	0.186563	0.0126928	0.0778039	0.0777311	0	0.00661218	0.0477042	0.195597	0.0975071	0.0755473	0.103478	0.00156812	0.05	0.177787	1.02038
TCGA.AR.A24S	0.059349	0.0040556	0.016679	0.176255	0.00642864	0.0351832	0.022467	0	0	0.166996	0.0914645	0.180904	0.176857	0.0468355	0.0081208	0	0.267392	0.974773
TCGA.AR.A24T	0.127988	0.0524117	0.0486378	0.132318	0	0.0301697	0.0067904	0.0106288	0.0766663	0.00438712	0.0475956	0.239777	0.0121976	0.210432	0	0.06	0.27271	0.968792
TCGA.AR.A24U	0.0406238	0.00876347	0.0247128	0.288711	0.030504	0.0836962	0.00323417	0	0.00606249	0.150958	0.0816981	0.144421	0.0226006	0.077994	0.00493953	0.05	0.0482154	1.06408
TCGA.AR.A24V	0.118466	0.0204948	0.00313389	0.0983832	0.00234164	0.0241567	0.0281965	0	0	0.282647	0.0342054	0.281152	0	0.0771335	0.0163191	0.01	0.258672	0.987163
TCGA.AR.A24W	0.146881	0.0699582	0.0684617	0.199229	0	0.0544203	0	0.00459401	0	0	0.00338996	0.131797	0.0581697	0.183794	0.00902579	0.02	0.283105	0.966575
TCGA.AR.A24X	0.144441	0	0.0469084	0.352787	0.0172245	0.110253	0.00465246	0.00976146	0.0200755	0.0322056	0.161558	0.0807107	0.0060159	0.00241853	0	0.04	0.0900653	1.07651
TCGA.AR.A24Z	0.0450332	0.011804	0	0.0947881	0.00946576	0.0546366	0.0440584	0	0	0.354378	0.0511498	0.311608	0	0	0.00658631	0.08	0.19562	1.03335
TCGA.AR.A250	0.025055	0.00612457	0.050712	0.248616	0.0123637	0.0521424	0.0435151	0	0	0.257612	0.0689421	0.211419	0	0.0234979	0	0	0.0642153	1.07491
TCGA.AR.A251	0.112381	0.0128871	0.0689679	0.157331	0.0361222	0.0728055	0	0	0.00133614	0.0864419	0.140987	0.149875	0	0.0208144	0.00040183	0.06	0.152114	1.03165
TCGA.AR.A252	0.0666939	0.0626475	0.138068	0.271147	0.0256087	0.045823	0.021438	0.00302775	0.0075656	0.010548	0.0829159	0.146159	0.0336717	0.0455528	0.00140892	0.03	0.1815	1.0171
TCGA.AR.A254	0.0189575	0.00875552	0.0798566	0.228224	0.0510479	0.024864	0.0320566	0	0	0.200584	0.098191	0.221127	0.00477776	0.0129713	0.00655797	0	0.0551858	1.07282
TCGA.AR.A255	0.0940411	0.0151145	0.0675885	0.170086	0.0302581	0.0645428	0.0296203	0	0	0.0847181	0.135168	0.172713	0.0176863	0.100681	0.000450652	0.06	0.188589	1.0069
TCGA.AR.A256	0.0451516	0.000535286	0.0508337	0.0919376	0	0.0735913	0.0392335	0	0.00868118	0.287594	0.0696294	0.116621	0.0458348	0	0	0.06	0.394554	0.921508
TCGA.AR.A2LE	0.080808	0.0219022	0.0510492	0.251423	0.0226657	0.0171183	0.0329264	0	0.00042939	0.0444849	0.124775	0.202772	0.0617792	0.0508181	0	0.05	0.141066	1.02597
TCGA.AR.A2LH	0.19417	0.0514791	0.139386	0.179035	0.01956	0.0106076	0.0691076	0.0670902	0.0254404	0.0129997	0.0554483	0.0897927	0.00169589	0.0805298	0.00365801	0	0.302658	0.964972
TCGA.AR.A2LJ	0.0295232	0.0515249	0.0962509	0.0602459	0	0.0543788	0.0906999	0.0239523	0.0188023	0.297857	0.0674461	0.136625	0.0277055	0.0449882	0	0.01	0.134212	1.03785
TCGA.AR.A2LK	0.0534058	0.00757017	0.0352793	0.166793	0	0.0232508	0.0333995	0	0.0559778	0.188379	0.0765631	0.266758	0.0122531	0.0764474	0	0.07	0.0867827	1.0515
TCGA.AR.A2LL	0.109052	0.0459049	0.0630408	0.0545736	0	0.0266394	0.0270115	0.0164218	0.0101165	0.289031	0.0466542	0.172737	0.0534483	0.0844386	0.000930708	0.05	0.216049	1.00132
TCGA.AR.A2LM	0.0664058	0.0110907	0.109593	0.178846	0	0.0714913	0	0.0186124	0.0439923	0	0.0869596	0.10736	0.0525224	0.252249	0	0.02	0.158368	1.01867
TCGA.AR.A2LN	0.0994761	0.014871	0.0834511	0.228829	0	0.0441859	0	0.018525	0.0393119	0	0.0568773	0.131046	0.0177016	0.248343	0.00391369	0.11	0.145319	1.02338
TCGA.AR.A2LO	0.163128	0.0291123	0.125263	0.249985	0	0.107288	0.0664708	0.0321717	0.0133334	0.0521117	0.105325	0.0285421	0.0124394	0.0132946	0.00153356	0.04	0.231538	1.00938
TCGA.AR.A2LQ	0.0631301	0.0383017	0.0228889	0.114379	0.000786818	0.024557	0.00835534	0	0	0.318114	0.0488482	0.241579	0	0.11719	0	0.07	0.114004	1.05459
TCGA.AR.A2LR	0.0532574	0.00271497	0.0593278	0.143738	0	0.0417003	0.0176549	0.0040701	0.0140667	0.109068	0.066094	0.302374	0	0.0937414	0.000905136	0.07	0.0915718	1.04286
TCGA.AR.A5QM	0.130658	0.0338695	0.0885604	0.0260626	0.0262357	0.0483295	0.0607818	0	0.00120194	0.321297	0.0433258	0.0561141	0.00125765	0.149543	0	0.03	0.205665	1.00538
TCGA.AR.A5QN	0.113172	0	0.11105	0.185791	0.00906988	0	0.0191245	0	0.0103974	0.0172294	0.164678	0.217671	0.0114235	0.134216	0.00617708	0.05	0.182215	1.0141
TCGA.AR.A5QP	0.118394	0.123708	0.0584412	0.137293	0.0183714	0.0724866	0.0588866	0	0.0196004	0.09211	0.0763879	0.136902	0.0238017	0.057024	0	0.06	0.324953	0.950214
TCGA.AR.A5QQ	0.086037	0.0863238	0.096745	0.101436	0.0714851	0.0552901	0.0346168	0.0158377	0	0.115065	0.103537	0.146651	0.048353	0.0235204	0.0151027	0.06	0.260963	0.975903
TCGA.B6.A0I1	0.0688881	0.0290456	0.0492157	0	0	0.021852	0.0295491	0.0137733	0	0.57656	0.0698893	0.0549281	0	0.0294179	0	0.07	0.102919	1.11074
TCGA.B6.A0I2	0.015437	0.0918401	0.315364	0	0.0205976	0.116189	0.100706	0.0600719	0	0.103387	0.117983	0.0449361	0.00491162	0.00857631	0	0.06	0.16722	1.04402
TCGA.B6.A0I5	0.155525	0.0605502	0.0872533	0.0554985	0.00557431	0.121744	0.0851155	0.00484419	0	0.208924	0.0714371	0.106396	0.00482932	0.0323086	0	0.07	0.210859	1.0039
TCGA.B6.A0I6	0.0946534	0.0288762	0.0785427	0.0582718	0	0.0828837	0.0575871	0.0181312	0	0.28003	0.0449411	0.170744	0.0585769	0.0245388	0.00222296	0.01	0.16025	1.02649
TCGA.B6.A0I8	0.0700769	0.0727306	0.0288917	0.0456608	0	0.028977	0.0171344	0.00252828	0.0399557	0.211765	0.0866127	0.292901	0.00174413	0.0699417	0.0130956	0	0.18863	1.01581
TCGA.B6.A0I9	0.0635024	0.00711564	0.0671256	0.153583	0	0.0353469	0.0649047	0.00497362	0	0.234093	0.147804	0.139996	0.0199812	0.0615736	0	0.04	0.0798222	1.06404
TCGA.B6.A0IA	0.00319793	0	0	0	0	0.0805941	0.0604238	0	0	0.575393	0	0.0692583	0	0	0	0.01	0.183518	1.06874
TCGA.B6.A0IB	0.0763032	0.00942397	0.050777	0.104781	0	0.0231942	0.123859	0.0596675	0	0.283706	0.0668708	0.0847319	0	0.116685	0	0.03	0.106597	1.04666
TCGA.B6.A0IC	0.000474299	0	0	0.142118	0	0.0103282	0.0544334	0.0137839	0.0352398	0.389014	0.0201413	0.196138	0.0305458	0.0735657	0	0.02	0.0843375	1.08097
TCGA.B6.A0IE	0.192877	0.367081	0.0954464	0.0724404	0.00285739	0.0116458	0.0359913	0.00352332	0.0210996	0.0360108	0.0585419	0.00918737	0	0.0932979	0	0.02	0.489701	0.894597
TCGA.B6.A0IG	0.107342	0.010173	0.035299	0.187654	0	0.0557999	0.076612	0	0	0.286281	0.171437	0.0413014	0	0.0251069	0	0.02	0.118781	1.05885
TCGA.B6.A0IH	0.0608303	0.0335485	0.230261	0.105765	0.00784688	0.116425	0.0425135	0	0.0102784	0	0.142165	0.0839996	0.0785758	0.0818659	0	0.01	0.123808	1.04652
TCGA.B6.A0IJ	0.0118983	0.0162461	0.118595	0.119322	0.0350347	0.0517539	0.0571587	0	0	0.256358	0.152856	0.0922662	0.0520813	0.0247807	0	0.05	0.0531675	1.08018
TCGA.B6.A0IK	0.135183	0.0126859	0.138032	0.0593701	0	0.0638206	0.0928273	0.0285692	0.00703827	0.126709	0.135227	0.0709863	0.0152519	0.112947	0.00135299	0.03	0.190507	1.01018
TCGA.B6.A0IM	0.0234294	0.000336311	0.0125619	0.117692	0	0.03346	0.0256332	0	0	0.428937	0.0759524	0.202633	0.0255701	0.0522035	0	0.06	0.446739	0.899153
TCGA.B6.A0IN	0.11008	0.0733516	0.051585	0.105999	0	0.108138	0.0757491	0.0315163	0	0.107298	0.0770306	0.0632931	0.158901	0.0370585	0	0.01	0.255889	0.978043
TCGA.B6.A0IO	0.0500586	0.00848894	0.170339	0.177476	0.064056	0.0351397	0.0558945	0	0	0.120762	0.149564	0.09374	0.020877	0.0485846	0	0.04	0.222967	1.00159
TCGA.B6.A0IP	0.149239	0	0.126109	0.176971	0.00081262	0.089641	0.0407584	0.0127373	0	0.022857	0.12131	0.0892548	0.0430113	0.0723812	0.00470625	0	0.248481	0.988967
TCGA.B6.A0IQ	0.0876153	0.0780796	0.0895559	0.075664	0.00576459	0.15117	0.0785445	0.0264623	0	0.151353	0.10916	0.0660975	0.0637983	0.0167355	0	0.02	0.215238	1.00145
TCGA.B6.A0RE	0.15219	0.117721	0.026599	0.06168	0.00948138	0.0626142	0.0358181	0	0	0.334095	0.0858077	0.0977516	0.00942501	0	0	0	0.302125	0.972536
TCGA.B6.A0RG	0.0585526	0.0335327	0.0448988	0.0687117	0	0.0983352	0.0156302	0.0443986	0	0.299337	0.0509475	0.11573	0.0221333	0.147792	0	0.08	0.139493	1.0316
TCGA.B6.A0RH	0.12977	0.237199	0.00485297	0.102379	0.000611064	0.0486952	0.010272	0.0181491	0.0031649	0.200872	0.111707	0.0393506	0	0.0770566	0	0.03	0.411516	0.918232
TCGA.B6.A0RI	0.0467344	0.00807909	0.0320479	0.121496	0	0.0415427	0.0453841	0	0.0366662	0.262652	0.0488419	0.260828	0.0344043	0.0412344	4.75881e-05	0.04	0.234805	0.995795
TCGA.B6.A0RL	0	0.00535792	0.0814419	0	0	0.125096	0.0119113	0.0464157	0	0.209944	0	0.401332	0	0.033557	0.00500278	0.04	0.0268252	1.09604
TCGA.B6.A0RM	0.054552	0.0109751	0.0519316	0.237804	0	0.0309246	0.0173228	0.0184639	0.00949384	0	0.0710808	0.101243	0.0755484	0.32066	0	0.05	0.132375	1.03421
TCGA.B6.A0RN	0.0799544	0	0.112897	0.181884	0	0.109754	0.0273193	0.0577388	0.0155733	0	0.0530529	0.195483	0.0139011	0.142148	0.0078664	0.18	0.0911394	1.04834
TCGA.B6.A0RO	0.085805	0.00813974	0.130449	0.0640746	0	0.116307	0	0.0182653	0.133589	0	0.0835096	0.198202	0.00277483	0.0478775	0	0.04	0.0915157	1.04107
TCGA.B6.A0RP	0.066137	0	0.0628767	0.193286	0.0182829	0.076571	0.0723546	0	0.0133767	0.125119	0.0707265	0.206372	0.0287842	0.0405821	0.00381327	0.01	0.11006	1.04032
TCGA.B6.A0RQ	0.114302	0.0209885	0.109179	0.0240316	0	0.0868312	0.00614307	0.00961315	0.0404675	0.0735587	0.0331611	0.217285	0.0254716	0.237797	0	0.02	0.18522	1.00403
TCGA.B6.A0RS	0.104552	0.0523074	0.0836285	0.15797	0.0322754	0.120947	0.0168211	0.00240241	0	0.143799	0.0883915	0.155189	0.0110155	0.00789845	0.000509656	0.06	0.206122	1.00321
TCGA.B6.A0RT	0.0768786	0.0267337	0.220751	0.113171	0.0597649	0.0896204	0.123591	0	0	0.062549	0.134442	0.0559047	0	0.0334279	0	0	0.143246	1.04972
TCGA.B6.A0RU	0.0992693	0.0120383	0.0448871	0.115471	0	0.0728243	0.0356627	0.00533817	0	0.167676	0.135674	0.126713	0.090002	0.0717707	0	0.05	0.170661	1.01532
TCGA.B6.A0RV	0.130684	0.0452463	0.0585051	0.13493	0.0213583	0.0520373	0.11175	0.00167657	0.023985	0.0996599	0.132585	0.0981864	0.0173653	0.0720297	0	0.03	0.234127	0.990193
TCGA.B6.A0WS	0.10724	0.0617621	0.0312992	0.134179	0.0176638	0.0641821	0.0905265	0.0116341	0	0.161212	0.0815928	0.0856298	0.00285817	0.0699567	0	0.01	0.231568	0.989381
TCGA.B6.A0WT	0.0562345	0.0391282	0.0308984	0.190301	0	0.0802063	0.0439711	0	0	0.146736	0.0507293	0.160324	0.0034061	0.128009	0.00948455	0.01	0.119611	1.03032
TCGA.B6.A0WV	0.0763039	0.0424616	0.052892	0.263983	0	0.0754301	0.0143105	0.00999985	0	0.0986378	0.090096	0.158282	0.0194706	0.0391941	0.003095	0.01	0.0507294	1.06533
TCGA.B6.A0WW	0.0535133	0.0102756	0.039095	0.16316	0.0294058	0.139095	0.0244885	0	0.00395033	0.129493	0.139898	0.178909	0	0.0578291	0.00512023	0.03	0.114902	1.04269
TCGA.B6.A0WX	0.181686	0.0162383	0.09326	0.225728	0	0.120473	0.0690654	0.0037228	0.00263523	0.0698433	0.12552	0.0437964	0.0200953	0.0279365	0	0.02	0.21458	1.01326
TCGA.B6.A0WY	0.0578593	0.00269152	0.0962846	0.0850591	0	0.0600302	0.0670015	0.00675653	0	0.174948	0.182137	0.156295	0.00779282	0.0866839	0.00047982	0	0.160057	1.03111
TCGA.B6.A0WZ	0.00937728	0.0131721	0.0604389	0.142342	0	0.0637854	0.0310845	0	0	0.247213	0.0437701	0.177273	0	0.139989	0	0.05	0.15501	1.02512
TCGA.B6.A0X0	0.0218033	0.0050599	0.125995	0.1601	0	0.117546	0.062742	0.0524136	0.00683073	0.0954811	0.124278	0.107731	0.0670455	0.0529724	0	0.32	0.0536671	1.07437
TCGA.B6.A0X1	0.00864499	0.00216631	0.273109	0	0.139773	0.104658	0.0220696	0.0537788	0.0559222	0.0804895	0.0731768	0.109181	0	0.0389529	0.000911486	0.11	0.12013	1.04448
TCGA.B6.A0X4	0	0	0	0.121697	0	0.0579963	0.0359562	0.0524685	0	0.0557911	0.0494779	0.413102	0.0565867	0.150734	0	0.03	0.0428873	1.07084
TCGA.B6.A0X5	0.0156979	0.00722414	0.0946142	0.0990967	0	0.0646425	0.000536297	0	0.0408025	0.048265	0.0324271	0.382253	0.0137204	0.200721	0	0.06	0.0011225	1.08316
TCGA.B6.A0X7	0.0815224	0.0190239	0.0784238	0.139893	0	0.0274118	0.033969	0.0130819	0	0.0301635	0.163105	0.133997	0.0255482	0.246819	0	0.05	0.120971	1.04145
TCGA.B6.A1KC	0.000484764	0	0.0975621	0.0269903	0.00230844	0.0381966	0.0300102	0	0.00803926	0.234964	0.0379699	0.352791	0.00741205	0.163272	0	0.24	0.448332	0.894116
TCGA.B6.A1KF	0.0913924	0.0118435	0.00529724	0.0050296	0	0.0850518	0	0.0276384	0	0.545855	0.00952992	0.170959	0	0.023269	0	0.06	0.221245	1.04514
TCGA.B6.A1KI	0.095626	0.0241869	0	0.111747	0	0.0716298	0.0394769	0	0	0.23359	0.11595	0.162186	0.000313643	0.130213	0.00460696	0.06	0.177423	1.01517
TCGA.B6.A1KN	0.169207	0.0367269	0.108806	0.154442	0	0.108424	0.0324802	0	0.00652709	0.0785709	0.164801	0.0176924	0	0.056405	0.00793611	0.02	0.274884	0.983464
TCGA.B6.A2IU	0.109293	0.0231876	0.0879196	0.145143	0	0.0961879	0.0130128	0.00548817	0.0588047	0	0.11117	0.144898	0.0252218	0.173742	0	0.24	0.185274	1.00567
TCGA.B6.A3ZX	0.153659	0.0956139	0.146338	0.0651961	0.00667679	0.144891	0.145302	0.0321108	0	0.0776235	0.044841	0.0256872	0	0.0292557	0	0.07	0.322152	0.964554
TCGA.B6.A400	0.0152464	0	0.0487093	0.0776544	0	0.0601597	0.119507	0	0	0.290818	0.0215359	0.100402	0.0811201	0	0.00735547	0.02	0.360758	0.937928
TCGA.B6.A401	0.118764	0	0.0667155	0.0861168	0	0.0907735	0.100354	0.0397711	0	0.310427	0.0431297	0.064198	0	0.0797502	0	0.02	0.437286	0.898704
TCGA.B6.A402	0.0436997	0.0154265	0	0.111472	0	0.030588	0.0382265	0	0	0.553451	0.0608268	0.106635	0	0	0	0.05	0.136931	1.08816
TCGA.B6.A408	0.0184342	0.0188641	0.11445	0.164988	0	0.0878281	0.0800452	0.0136376	0.00845018	0.181092	0.101647	0.149361	0.0102517	0.0397005	0	0.01	0.0553792	1.07175
TCGA.B6.A409	0.0816552	0.00444725	0.0742141	0.0874007	0	0.0677234	0.145567	0.0306586	0	0.187163	0.129929	0.0835835	0.0160844	0.0833244	0.00824979	0.15	0.109676	1.04635
TCGA.B6.A40B	0.0570396	0.000891642	0.0124898	0.0448538	0	0.0794415	0.0250432	0.0161245	0	0.435865	0.0197033	0.0944493	0.0079496	0.163495	0.00149614	0.01	0.076497	1.08456
TCGA.B6.A40C	0.0237957	0.00583753	0.146821	0.227107	0	0.073416	0.0701456	0.0122741	0.076146	0.0166265	0.0899146	0.199932	0.00384568	0.039686	0.00834511	0.05	0.0504381	1.07433
TCGA.BH.A0AV	0.0758365	0.0431723	0.0159595	0.0739629	0	0.019546	0.0185091	0	0	0.564827	0.0247976	0.126118	0	0.0231355	0	0.01	0.155602	1.08118
TCGA.BH.A0AW	0.0563671	0.0303283	0.0983584	0.182711	0.0494489	0.0529967	0.0974249	0.0341736	0.000715938	0.0976515	0.0666683	0.124651	0.0125078	0.0750658	0.00070639	0.05	0.12988	1.03296
TCGA.BH.A0B0	0.077627	0.013043	0.100621	0.106694	0.00960437	0.059195	0.101342	0.0192553	0	0.143434	0.110547	0.0838319	0.0474548	0.127277	0	0.02	0.16514	1.01597
TCGA.BH.A0B1	0.101488	0.00925076	0.0390697	0.237618	0	0.0691256	0	0.0201985	0	0.0557273	0.10951	0.134552	0.0439071	0.17501	0.00103862	0.04	0.167395	1.01339
TCGA.BH.A0B4	0.060864	0.00615836	0.114612	0.138623	0	0.0567171	0.0701619	0.00656428	0.00483692	0.0833611	0.135034	0.152607	0.0138059	0.124115	0	0.07	0.157819	1.0227
TCGA.BH.A0B6	0.0477504	0.0333504	0.209596	0.0436957	0	0.103594	0.134556	0.057512	0.0135055	0.11582	0.0797513	0.0604134	0.0230992	0.0637952	0	0	0.148144	1.03525
TCGA.BH.A0B9	0.0274062	0	0.217509	0.0952643	0.0329212	0.109798	0.0907119	0.045638	0.00780793	0.0912831	0.129772	0.0132452	0.0762014	0.0497571	0	0.08	0.137107	1.04763
TCGA.BH.A0BD	0.0527855	0.00816408	0.11638	0.21885	0	0.0801336	0.0334766	0	0.000291936	0.0634276	0.16028	0.12186	0.0372624	0.0968823	0	0	0.106032	1.05215
TCGA.BH.A0BF	0.0356918	0.00235802	0.141355	0.160118	0.0339317	0.0965042	0.059798	0.0133533	0.0314447	0.0465924	0.117918	0.145571	0.00920371	0.0970734	0	0.07	0.0565112	1.06768
TCGA.BH.A0BG	0.0855019	0	0.168606	0.104137	0.0115319	0.0955637	0.0645959	0.0557471	0	0.0644653	0.193205	0.0514478	0.00129867	0.0605949	0	0.06	0.162143	1.04511
TCGA.BH.A0BL	0.162431	0.0456408	0.0586698	0.167218	0.0348249	0.0759965	0.0445246	0.0230977	0.00897514	0.0473356	0.142839	0.0960997	0.0763981	0.0134371	0.00251175	0.02	0.313506	0.95758
TCGA.BH.A0BO	0.118817	0.0751227	0.020034	0.162865	0.027854	0	0	0	0.0511188	0.0160956	0.0202166	0.124057	0.00442242	0.166027	0.159115	0.09	0.26804	0.972541
TCGA.BH.A0BP	0.131646	0.0129719	0.0438231	0.0593599	0.0107638	0.0371703	0.0457309	0	0	0.366356	0.0880555	0.181539	0.00129694	0.0151082	0	0.05	0.215733	1.01549
TCGA.BH.A0BR	0.0716281	0.0107332	0.0334348	0.0402798	0.0152406	0.0757684	0.0599424	0	0	0.358351	0.0653629	0.160033	0.0174092	0.0698434	0.000234664	0.96	0.396327	0.920558
TCGA.BH.A0C1	0.0418141	0.00987459	0.265145	0.250201	0.0299212	0.0355209	0.0221728	0	0.0160042	0	0.0837642	0.12532	0.0471042	0.0320514	0	0.04	0.11719	1.05584
TCGA.BH.A0C7	0.0809881	0.0134764	0.077663	0.282576	0	0.0504073	0	0.000533092	0	0.093709	0.0985362	0.118599	0.0185699	0.14995	0	0.07	0.159981	1.01929
TCGA.BH.A0DE	0.0685797	0.00235328	0.0332208	0.233301	0.0174359	0.0621577	0.0631652	0	0	0.0937014	0.155338	0.173142	0.0290166	0.0407904	0.00168663	0.99	0.149328	1.03115
TCGA.BH.A0DI	0.0664006	0.00363902	0.0599514	0.100723	0	0.0938302	0.0183008	0.0125442	0	0.298021	0.0945915	0.127487	0.0220771	0.102434	0	0.02	0.0813726	1.06032
TCGA.BH.A0DS	0.0807083	0.0306731	0.167927	0.0848239	0.0140154	0.0544626	0.0285758	0.00522839	0	0.258337	0.0871605	0.113844	0.0453303	0.0258479	0	0.05	0.156074	1.02718
TCGA.BH.A0DX	0.0285819	0.00048977	0.0237842	0.0698128	0.00859783	0.0202212	0.011505	0.00520576	0	0.49871	0.0451617	0.155482	0.00531818	0.119951	0	0.11	0.187919	1.05042
TCGA.BH.A0E2	0.0629711	0.0233678	0.095932	0.101418	0	0.0755806	0.072671	0.0155534	0	0.298743	0.0735525	0.102524	0	0.0776874	0	0.05	0.134196	1.03785
TCGA.BH.A0E6	0.115225	0.0404274	0.172195	0	0.0250926	0.0683059	0.128615	0.0513596	0.0121828	0.210867	0.0851625	0.0555343	0	0.0350321	0	0.06	0.192355	1.01268
TCGA.BH.A0E7	0	0.0187115	0.0328431	0.0900599	0	0.0296283	0.0241811	0.0384935	0.0137387	0.0737829	0.0632268	0.357417	0.0195041	0.233383	0	0.05	0.0532946	1.06534
TCGA.BH.A0E9	0.154801	0.037145	0.126137	0.291966	0	0.00829645	0.0270515	0.00990923	0.015255	0	0.047921	0.112999	0.0514666	0.115362	0	0.01	0.244319	0.987075
TCGA.BH.A0EA	0.0621939	0.00338103	0.100631	0.086329	0	0.042086	0.0438389	0.0273506	0	0.239787	0.040968	0.127498	0.161085	0.0580924	0.00675921	0.07	0.0939275	1.04819
TCGA.BH.A0EB	0.0374855	0.00730449	0.0556505	0.185718	0.011655	0.0526048	0.073469	0	0.0859887	0.0213284	0.0655835	0.20263	0.130359	0.0532876	0.000486058	0.05	0.0576331	1.05172
TCGA.BH.A0EE	0.0606236	0.0156631	0.0207289	0.219134	0	0.0797928	0.068057	0.064121	0	0.0896917	0.1301	0.062679	0	0.0826931	0.00236941	0.01	0.15958	1.02968
TCGA.BH.A0EI	0.0858279	0.0133385	0.015439	0.0656949	0	0.0706277	0.0195128	0.0294144	0.0130378	0.157509	0.00779625	0.289147	0	0.181503	0.0213753	0.01	0.15017	1.02245
TCGA.BH.A0GY	0.121201	0.0214083	0.0301928	0.0952065	0.0140926	0.03529	0.0364499	0.00530901	0	0.380611	0.1202	0.0769438	0	0.0590595	0.00403583	0.04	0.20165	1.01927
TCGA.BH.A0GZ	0.0764297	0.00826833	0.119448	0.178938	0	0.0503484	0.0348637	0.0261202	0.0443616	0.0859256	0.0743436	0.128217	0.0682338	0.104502	0	0	0.113808	1.03172
TCGA.BH.A0H0	0.0754335	0.0307046	0	0.223258	0.00139357	0.0465156	0.055301	0.015864	0.0135063	0	0.0878116	0.233046	0.0082069	0.208959	0	0.01	0.147493	1.02041
TCGA.BH.A0H3	0.0764885	0.0195285	0.0426815	0.274876	0.00549459	0.0315978	0.0156315	0.0237276	0.00449125	0.139619	0.144322	0.110899	0.0350307	0.0756107	0	0.04	0.138075	1.03228
TCGA.BH.A0H6	0.0418039	0.0100343	0.0261975	0.16596	0	0.0371322	0.0137412	0.016757	0.0512375	0.0565935	0.060181	0.352412	0.0648754	0.10113	0.00194478	0.27	0.141657	1.02354
TCGA.BH.A0HB	0.0393088	0.00643722	0.173425	0.151785	0.0138171	0.0374896	0.0753624	0.0211266	0.0144318	0.127292	0.0735892	0.179188	0.0403831	0.0463642	0	0.03	0.102009	1.04643
TCGA.BH.A0HF	0.0533532	0.00401393	0.0572617	0.116838	0	0.0499304	0.00343868	0	0	0.429656	0.0705983	0.110241	0.0300216	0.0739685	0.00067817	0	0.10006	1.07451
TCGA.BH.A0HI	0.0697075	0.0067588	0.0212997	0.134791	0	0.139536	0.0341023	0.0158192	0	0.297541	0.0676075	0.168026	0	0.0288693	0.00449868	0.06	0.202406	1.01216
TCGA.BH.A0HL	0.0337462	0.0295613	0.0128121	0	0	0.0228421	0.0849215	0	0	0.385429	0.0138023	0.270742	0.0153253	0.0484777	0.0109527	0.01	0.185725	1.03997
TCGA.BH.A0HN	0	0	0.0341973	0.129545	0	0.0126617	0.130221	0	0.0384245	0	0.0359839	0.339116	0.121746	0	0.00332838	0.07	0.0818283	1.05145
TCGA.BH.A0HO	0.0113918	0.000632863	0.0282765	0.140145	0	0.0391534	0.0343328	0.0467892	0.00212172	0.260902	0.0635648	0.303784	0	0.0604244	0.0084818	0.03	0.0656743	1.07663
TCGA.BH.A0HP	0.0878876	0.0114972	0.0520964	0.214244	0	0.0531555	0.0711015	0	0.00446001	0.00583574	0.133042	0.221385	0.00339342	0.0982917	0	0.06	0.148421	1.02785
TCGA.BH.A0HQ	0.22044	0.0480886	0.0410991	0.0281475	0	0.0306368	0.0644121	0	0	0.351538	0.0205957	0.0505129	0	0.144529	0	0.04	0.358697	0.940473
TCGA.BH.A0HU	0.0676782	0.0137183	0.187679	0.130263	0	0.0866823	0.0527092	0.0350382	0.00931308	0.133519	0.0898798	0.109929	0.0174163	0.045096	0	0.05	0.151746	1.02963
TCGA.BH.A0HW	0.00101752	0.00753976	0.0910726	0.0295967	0	0.016952	0.0573685	0.0147008	0	0.249808	0.0200507	0.257457	0	0.121523	0.00428446	0.06	0.0997161	1.05685
TCGA.BH.A0HX	0.135802	0.0266347	0.0468374	0.246672	0	0.0270327	0.0687345	0	0	0.247463	0.0552447	0.0933633	0.00158657	0.049396	0.00123267	0.03	0.232456	0.994338
TCGA.BH.A0HY	0.0940016	0.0210549	0.0735107	0.15875	0.00346119	0.10259	0.0284615	0	0.000334967	0.148086	0.138941	0.132836	0.00758902	0.0718543	0	0.45	0.152961	1.02611
TCGA.BH.A0RX	0.0561974	0.00048159	0.218407	0.0843911	0.0285028	0.0660816	0.0540685	0.0326966	0.0144005	0.113921	0.169454	0.0679346	0.027072	0.0475925	0	0.01	0.0704894	1.07593
TCGA.BH.A0W3	0.00200512	0.00897604	0.0363084	0.176466	0	0.0445494	0.0289914	0	0.145481	0	0.09884	0.348575	0.0175027	0.0923044	0	0.01	0.139209	1.02835
TCGA.BH.A0W4	0.0595581	0.0192661	0.0245613	0.103328	0	0.032829	0.00978735	0.0185172	0	0.364266	0.0803748	0.0975634	0.0126363	0.164577	0	0	0.143756	1.04022
TCGA.BH.A0W5	0.147578	0.050794	0.0818902	0.220813	0.0243825	0.0855501	0.0507184	0	0	0.167005	0.0571281	0.0649118	0	0.0414086	0	0.06	0.257706	0.983968
TCGA.BH.A0W7	0.0987808	0.0341312	0.0870359	0.166164	0.0432453	0.0439877	0.0858242	0	0	0.161886	0.0831164	0.0990012	0.0177536	0.0635808	0.000336694	0.04	0.179958	1.01103
TCGA.BH.A0WA	0.0427302	0.00204792	0.0542902	0.137859	0.0260978	0.0489723	0.0405459	0	0	0.326022	0.1443	0.104766	0.0256031	0.0199361	0	0.06	0.251784	0.994699
TCGA.BH.A18F	0.0921552	0	0.106183	0.185941	0	0.0460441	0.0924205	0.00370275	0.0206632	0.154035	0.154097	0.0363931	0.0290078	0.079356	0	0.01	0.111294	1.04994
TCGA.BH.A18G	0	0.000248042	0.0992668	0.193803	0.0314641	0.0427857	0.0190622	0	0.149226	0	0.0690334	0.231298	0	0.00901178	0	0.01	0.0555676	1.06395
TCGA.BH.A18H	0.113315	0.00778189	0.213553	0.148748	0.0372472	0.0459641	0.0746641	0	0	0.142008	0.0884428	0.0488257	0.00796487	0.0151613	0	0.05	0.140367	1.04277
TCGA.BH.A18I	0.0591768	0.00350846	0.0795722	0.202858	0.0196938	0.0836584	0.0499506	0.0015656	0	0.0649178	0.107118	0.124473	0.0665996	0.0931605	0.000804716	0.05	0.0919187	1.04677
TCGA.BH.A18T	0.0889108	0.0146162	0.0588909	0.106587	0.0180468	0.0904531	0.0376117	0.0234986	0	0.256499	0.118749	0.153745	0	0.0313107	0.0010813	0.08	0.196631	1.01193
TCGA.BH.A1ES	0.0437324	0.0153125	0	0.218121	0	0.0421098	0	0	0	0.24445	0.0158322	0.259432	0.00696305	0.0586078	0.0253928	0.1	0.102553	1.051
TCGA.BH.A1EX	0.0669746	0.00551169	0.030661	0.175896	0	0.100393	0.014349	0	0	0.24982	0.0940948	0.228493	0	0	0.0188348	0.09	0.106376	1.05591
TCGA.BH.A1EY	0.0466996	0.00244108	0.0454603	0.214719	0.0134692	0.0664654	0.0539832	0	0	0.133718	0.0769967	0.188818	0.0723453	0.0848834	0	0	0.288313	0.964575
TCGA.BH.A1F5	0.135089	0.0161849	0.0247746	0.214309	0	0.0520809	0.000329012	0.0338995	0.0153741	0	0.030441	0.232246	0.07812	0.108448	0.00229655	0.04	0.18632	1.00319
TCGA.BH.A1FL	0.11172	0	0.0520539	0.206665	0	0.0980788	0.0370951	0	0	0.0989714	0.107091	0.122079	0.0196233	0.145282	0.00134134	0.02	0.168757	1.01558
TCGA.BH.A201	0.106058	0.0228467	0.0471403	0.0515715	0	0.0831164	0	0.00589234	0	0.423615	0.0491207	0.11774	0	0.0757607	0.0163993	0.07	0.20997	1.01902
TCGA.BH.A202	0.0457264	0.00570648	0.184591	0.0739105	0.082637	0.0685733	0.0343408	0.0031092	0	0.117338	0.0814309	0.258414	0.00977337	0.0279125	0.00653658	0.03	0.131845	1.0325
TCGA.BH.A28O	0.202412	0.195032	0.138405	0.224083	0	0.0103732	0.000492182	0.00863798	0.0108448	0.000251359	0.0551196	0.077642	0.0148624	0.0616639	0	0.01	0.437852	0.903688
TCGA.BH.A28Q	0.125587	0.0143126	0.0643686	0.276999	0.00857503	0.068799	0	0	0.0408416	0	0.105126	0.151946	0.0244569	0.0882677	0.00742142	0.07	0.187579	1.0082
TCGA.BH.A2L8	0.0539082	0.0290379	0.213241	0.119316	0.0175433	0.0804002	0.0548663	0.070357	0.0031545	0.0435255	0.0981793	0.105499	0.0379482	0.0680003	0	0.02	0.143774	1.03709
TCGA.BH.A42T	0.0447302	0.00648001	0.0849249	0.137431	0	0.132001	0.0278429	0.0244082	0.0720252	0	0.0480854	0.133994	0.035239	0	0.000172586	0.01	0.228615	0.995314
TCGA.BH.A42U	0.132542	0.0703578	0.092611	0.115353	0	0.108234	0.092898	0.0444167	0	0.123668	0.078491	0.0642878	0.0378132	0.0363083	0.00301948	0.05	0.267934	0.978167
TCGA.BH.A42V	0.169105	0.0184139	0.0977095	0.172174	0.00661946	0.0882415	0.067917	0.0437471	0.0202759	0.0654419	0.0806406	0.0846439	0.0205759	0.0644946	0	0.02	0.221142	0.99843
TCGA.BH.A5IZ	0	0.0438595	0.0496778	0.0169234	0	0.0396759	0.0449498	0.0247459	0	0.410706	0.0402573	0.221338	0.00671862	0	0.0217439	0.05	0.0896772	1.09165
TCGA.BH.A5J0	0.0252604	0.00347648	0.109189	0.11332	0	0.0617664	0.112372	0.0186167	0	0.156928	0.114861	0.159508	0.0317957	0.0577836	0	0.03	0.171116	1.02092
TCGA.BH.A6R8	0.0721453	0.0112201	0.0447929	0.127831	0.00535434	0.0810285	0.092516	0.00269917	0.00391918	0.210435	0.0750087	0.205335	0	0.0596886	0	0	0.168248	1.01922
TCGA.BH.A6R9	0.0879571	0.0130285	0.0926534	0.101911	0	0.016466	0.0446858	0.0057005	0.000563857	0.173272	0.0828821	0.184993	0.0861846	0.0998095	0.00484758	0.07	0.144949	1.02187
TCGA.BH.A8FY	0	0	0.00789717	0.0604473	0	0.00768482	0.00121823	0.0210927	0.195596	0	0.0301498	0.433463	0.0705109	0.0665125	0.00220778	0.04	0.145125	1.03405
TCGA.BH.A8FZ	0.0910804	0.0205553	0.0346572	0.100707	0	0.0943164	0.0493843	0.014677	0.00574382	0.159697	0.035164	0.126497	0.0613559	0.106002	0.00358234	0.04	0.168242	1.00862
TCGA.BH.A8G0	0.147388	0.0340392	0.0615311	0.0936706	0.0115111	0.0264336	0.0426097	0.0238432	0	0.360805	0.0246687	0.0943495	0	0.0714772	0	0.06	0.32328	0.956281
TCGA.BH.AB28	0.153261	0	0.065284	0.215797	0	0.0638765	0.0926684	0.026489	0.0182793	0	0.0923427	0.14297	0.053462	0.0681875	0	0.06	0.227608	0.994026
TCGA.C8.A12L	0.100734	0.0701881	0.075202	0.194911	0.0366843	0.0691845	0.00833252	0	0.0258208	0.109751	0.0726707	0.1163	0.0612163	0.0178217	0.0131107	0.02	0.236526	0.985331
TCGA.C8.A12M	0.0542564	0.0310682	0.122211	0.140919	0.00842868	0.126586	0.0352635	0.00610581	0.0115487	0.084879	0.0638123	0.131439	0.00555262	0.177929	0	0.15	0.129299	1.03028
TCGA.C8.A12N	0.029164	0.00464503	0.0649826	0.0510771	0	0.0785317	0.0247424	0.0350703	0.0407336	0	0.0524112	0.181113	0.255575	0.163392	0.0128452	0.07	0.168009	1.00856
TCGA.C8.A12O	0.0997337	0.0333465	0.0596506	0.119972	0	0.0656916	0.0599218	0	0	0.282092	0.0631652	0.152905	0	0.0418403	0.00403825	0.03	0.168391	1.0226
TCGA.C8.A12P	0.0770188	0.0395061	0.0875819	0.108833	0.0230461	0.0455606	0.0388284	0	0.0499551	0.159562	0.103387	0.195962	0	0.0439741	0.00224733	0.01	0.168095	1.01488
TCGA.C8.A12Q	0.0157007	0	0.021566	0.121128	0	0.0751986	0.0309027	0.0154461	0	0.386533	0.0844002	0.173793	0.00143946	0.0672611	0	0.03	0.0393195	1.10082
TCGA.C8.A12U	0.0365466	0.00837941	0.230812	0.0797743	0.118706	0.0725444	0.0124199	0.0191764	0.00679508	0.045901	0.108024	0.105558	0.0328812	0.119688	0	0.06	0.096516	1.04746
TCGA.C8.A12V	0.03389	0	0.178239	0.170982	0.0463409	0.0920309	0.045737	0	0	0.097041	0.149651	0.0955702	0.021902	0.0278111	0.0103684	0.02	0.0650594	1.07802
TCGA.C8.A12W	0.0936349	0.00681462	0.0745569	0.0557613	0.0269662	0.0399692	0.0855623	0	0	0.300185	0.0503003	0.148013	0.00727186	0.109232	0	0	0.116539	1.04284
TCGA.C8.A12X	0.0236315	0.00638594	0.106926	0.0895182	0.0035456	0.0463183	0.0415761	0	0	0.238659	0.0347212	0.30868	0	0.0365265	0.0569838	0.03	0.0939945	1.06196
TCGA.C8.A12Y	0.0323231	0.0825348	0.0688132	0.0549963	0	0.081881	0.077883	0.0809297	0.0281277	0.0550669	0.127065	0.140855	0.0144711	0.15156	0.00349294	0.01	0.171283	1.01396
TCGA.C8.A12Z	0.00778458	0.00251969	0.0299149	0.129683	0	0.0522331	0.054615	0	0	0.443416	0.115361	0.0696164	0	0.054781	0.00280136	0.03	0.0235693	1.11718
TCGA.C8.A130	0.0701781	0.0161704	0.267896	0.066975	0.0119261	0.0640122	0.059031	0	0.00918533	0.0650957	0.103293	0.184212	0.00543898	0.0765859	0	0.05	0.15339	1.02726
TCGA.C8.A131	0.0128995	0.0159952	0.0931324	0.11706	0.0203616	0.0800714	0.0286153	0.00363415	0	0.384328	0.0256726	0.121151	0.0246361	0.0317719	0.00783706	0.04	0.0496179	1.09048
TCGA.C8.A132	0.148054	0.0733845	0.135732	0.176062	0.0281765	0.068253	0.0768135	0	0	0.115216	0.0736278	0.0509412	0.0220589	0.00942797	0.00155457	0	0.289248	0.972073
TCGA.C8.A134	0.0244811	0	0.081672	0.0706254	0.0428034	0.0510496	0.0562346	0	0	0.307521	0.19037	0.0877016	0.0275137	0.0389346	0	0.06	0.110085	1.06733
TCGA.C8.A135	0.159309	0.0808253	0.149947	0.169052	0.00308728	0.0645122	0.0358793	0.00357777	0.00119331	0.0196582	0.0860742	0.145573	0.0213536	0.0562696	0.0036885	0.05	0.307024	0.961188
TCGA.C8.A137	0.0254498	0.0496911	0.00799254	0.132432	0.00985019	0.0984178	0.0125068	0	0	0.29853	0.111787	0.174581	0	0.0787611	0	0.01	0.0953255	1.05927
TCGA.C8.A138	0.0995265	0.00879877	0.243358	0	0.0286453	0.0688343	0.0814205	0.00908867	0.0133697	0.178276	0.0506484	0.0828582	0.0141984	0.115799	0	0.05	0.159939	1.01931
TCGA.C8.A1HE	0.0608259	0.0122203	0.0436081	0.319073	0.00515493	0.0447563	0.0205725	0	0.119176	0	0.0917356	0.199676	0.00783077	0.0250595	0.00691176	0	0.0972943	1.04652
TCGA.C8.A1HF	0.00665723	0.0135132	0.331154	0.0307169	0.0868532	0.0558512	0.050186	0	0	0.0316063	0.0875046	0.216162	0.018093	0	0.00297707	0.02	0.0568676	1.08187
TCGA.C8.A1HG	0.0114797	0.0458106	0.22161	0.0469243	0.0693257	0.117643	0.0913327	0.00221107	0.00279119	0.0401232	0.086564	0.218346	0.00908995	0.0363219	0	0.07	0.0913652	1.05512
TCGA.C8.A1HI	0.0901395	0.068616	0.0201464	0.101606	0	0.0424828	0.0294149	0	0	0.0637565	0.135862	0.323948	0.0112133	0.101076	0	0.02	0.204038	1.00344
TCGA.C8.A1HJ	0.105781	0.028886	0.130646	0.0667728	0.101007	0.0707969	0	0	0	0.085808	0.186848	0.0819288	0	0.0165611	0	0.01	0.173582	1.02955
TCGA.C8.A1HK	0.222138	0.202023	0.0768197	0.110692	0.00427883	0.0176661	0.0648548	0.0281033	0.00676308	0.0194941	0.100083	0.0604871	0	0.0831709	0	0.05	0.447951	0.898537
TCGA.C8.A1HL	0.077281	0.0135613	0	0.083234	0	0.0257235	0.0214244	0	0	0.401848	0.0249238	0.295874	0	0.0547168	0	0.07	0.295592	0.986141
TCGA.C8.A1HM	0.0285261	0.00365821	0.332962	0	0.237939	0.0713867	0	0.0315289	0.00144562	0	0.072642	0.112158	0.00834089	0.0624932	0.0118347	0	0.090995	1.06451
TCGA.C8.A1HN	0.0486137	0.00654255	0.0422739	0.1106	0	0.0346219	0.0202103	0	0	0.350594	0.0659113	0.281304	0	0.0297966	0.00624622	0.06	0.237696	1.00837
TCGA.C8.A1HO	0.0458631	0.0515302	0.0516507	0.24216	0	0.0549154	0.00309434	0.0210845	0	0.170903	0.116641	0.178664	0.00368011	0.0598129	0	0	0.12781	1.03589
TCGA.C8.A26V	0.0690871	0.0127366	0.0845816	0.0979829	0.00834407	0.00526681	0.0902915	0	0	0.24464	0.0750916	0.130611	0.0406915	0.0872487	0	0.02	0.155448	1.02155
TCGA.C8.A26W	0.0667614	0.00603622	0.243609	0.130678	0.0158709	0.109871	0.0469628	0	0.021574	0.00604939	0.147218	0.170031	0	0.0302384	0	0.06	0.100234	1.06639
TCGA.C8.A26X	0.0193269	0.078962	0.0731195	0.0177746	0.0600994	0.0777622	0.050152	0	0	0.224879	0.117631	0.129906	0.0173225	0.0238711	0	0.39	0.160011	1.0234
TCGA.C8.A26Y	0.104926	0.00577324	0.0721064	0.101248	0	0.107699	0.0666217	0	0	0.317253	0.0890853	0.113561	0	0	0.00201914	0.07	0.16032	1.03462
TCGA.C8.A26Z	0.165371	0.0896329	0.0496576	0.0822852	0	0.0367739	0.0314656	0.0447943	0	0	0.120567	0.236279	0.0301838	0.0813232	0.0115478	0	0.324138	0.95141
TCGA.C8.A273	0.08426	0.056324	0.0315087	0.163304	0	0.0682269	0.0314263	0	0	0.288798	0.0424633	0.172817	7.34489e-05	0.0100377	0.00459206	0.05	0.190575	1.01549
TCGA.C8.A274	0.0746597	0.00431797	0.0341856	0.201337	0.00729507	0.0575931	0.0270892	0	0.0653297	0	0.114712	0.283592	0.0225841	0.0472385	0.016258	0	0.0943113	1.04345
TCGA.C8.A275	0.102145	0.0558484	0.126835	0.0486241	0.0987829	0.0449116	0.0474692	0	0	0.159035	0.0990831	0.105642	0.038366	0.0295631	0	0.01	0.228453	0.989283
TCGA.C8.A278	0.032554	0.0446427	0.0786314	0.0820518	0.0260081	0.0805384	0.0469271	0	0	0.148919	0.0893347	0.196365	0.050623	0.0995268	0.00649106	0	0.111094	1.03326
TCGA.C8.A27A	0.0744819	0.0600499	0.0133184	0.170921	0.000762753	0.0737307	0.0238272	0.00922709	0	0.259522	0.143981	0.151773	0	0.0139544	0	0.04	0.158807	1.03355
TCGA.C8.A27B	0.0407637	0.00971036	0.137991	0.0495637	0.0622899	0.0577682	0.0232137	0	0	0.318303	0.143	0.0893919	0.0163316	0.00896658	0.00500567	0.07	0.108866	1.06059
TCGA.C8.A3M7	0.207578	0.235135	0.108921	0.0890245	0	0.0268933	0.0144945	0.0347296	0.00465578	0.00657871	0.0589197	0.0743546	0.0129996	0.125715	0	0.04	0.462831	0.890615
TCGA.C8.A3M8	0.0822067	0.0090999	0.0675321	0.100008	0.00319572	0.05004	0.0468494	0	0	0.341335	0.0857507	0.157507	0	0.0342793	0	0.07	0.176435	1.02724
TCGA.C8.A8HP	0.0554488	0.0341514	0.119541	0.109405	0.0309931	0.0937831	0.112045	0.0153038	0	0.140402	0.0850532	0.123256	0.0106935	0.0534458	0.0129021	0.07	0.119021	1.039
TCGA.C8.A8HQ	0.0607435	0.00336656	0.11899	0.15671	0.0221551	0.0757691	0.0765236	0	0	0.231208	0.105957	0.108052	0	0.0282279	0.00658648	0.02	0.0849956	1.06256
TCGA.C8.A8HR	0.0265213	0	0.147987	0.190314	0	0.072148	0.0576013	0.0384856	0	0	0.162372	0.222162	0.0281005	0.0532167	0.000991752	0.05	0.0889026	1.06732
TCGA.D8.A13Y	0	0	0.0322865	0.0427404	0	0.112789	0	0.0613719	0	0.245653	0.0407558	0.337811	0.103378	0.0151837	0	0.02	0.0624123	1.08504
TCGA.D8.A13Z	0.0788237	0.00968201	0.0366453	0.115658	0.0225777	0.0478363	0.0380529	0	0	0.302819	0.0619269	0.188463	0	0.0283853	0.00490757	0.08	0.154425	1.03239
TCGA.D8.A140	0.0302228	0.0935062	0.153859	0.192334	0.00477456	0.0898813	0.0625577	0.00529512	0.000209836	0.0660664	0.065014	0.148819	0	0.0781445	0.00123221	0.01	0.195154	1.0099
TCGA.D8.A141	0.0857852	0	0.139416	0.245948	0.0361698	0.0778336	0.0496623	0	0.00412537	0.137675	0.111997	0.0555126	0.017673	0.0232284	0.00307307	0	0.134931	1.04496
TCGA.D8.A142	0.00962969	0.105491	0.0540924	0.0924048	0.0107992	0.0704626	0.0451897	0	0	0.280746	0.104312	0.120882	0.0200349	0.0305546	0.00893308	0.02	0.212713	1.00547
TCGA.D8.A143	0.0564969	0.00401761	0.112704	0.183254	0.0307652	0.0949915	0.0317609	0	0	0.128343	0.0939579	0.20425	0.0178403	0.0138238	0.00459583	0.08	0.0660631	1.06408
TCGA.D8.A145	0.150455	0.284091	0.062448	0.0876006	0	0.0404504	0.0263074	0.034205	0.0189037	0.0646273	0.0477705	0.073073	0.00379881	0.106269	0	0.04	0.464398	0.890507
TCGA.D8.A146	0.126203	0.00777585	0.0683034	0.0493594	0	0.0539379	0.0211611	0.0126182	0	0.253228	0.0562385	0.114297	0.00504703	0.231831	0	0.05	0.180526	1.01382
TCGA.D8.A147	0.14671	0.025121	0.046448	0.2373	0	0.0832493	0.0256524	0.00177458	0	0.19917	0.0692026	0.104807	0.00664711	0.0158002	0	0.08	0.263215	0.980437
TCGA.D8.A1J8	0.0297531	0.00218569	0.130075	0.099482	0.0996707	0.0951646	0.0138544	0.0219794	0	0.119322	0.12739	0.160353	0	0	0.0195723	0.07	0.217469	1.00294
TCGA.D8.A1J9	0.022785	0.00297791	0.0264085	0.0525366	0.0227184	0.0410289	0.033985	0	0	0.306911	0.0870945	0.293167	0	0.0747235	0.0089338	0.05	0.149249	1.04526
TCGA.D8.A1JA	0.0110618	0.000658275	0.104174	0.273643	0.00912033	0.00151802	0	0	0.100074	0	0.033508	0.208284	0	0	0.00754995	0.08	0.115228	1.04843
TCGA.D8.A1JB	0.115897	0.0299369	0.161252	0.124417	0.0162707	0.119828	0.0687261	0.00867567	0	0.0164638	0.0799817	0.107694	0.038437	0.0600335	0.00172055	0.19	0.192145	1.01473
TCGA.D8.A1JC	0.0533272	0.0220173	0.0602465	0.155371	0.0140107	0.0757349	0.0523955	0	0	0.29385	0.0853239	0.127485	0	0.0419084	0.00626974	0.05	0.1746	1.02245
TCGA.D8.A1JD	0.00254963	0.00591685	0.0470165	0.150255	0.0165221	0.0536477	0.0695963	0.00636339	0.00879035	0.0452977	0.0753919	0.238945	0.0790457	0.184461	0.00257584	0.06	0.0307543	1.06337
TCGA.D8.A1JE	0.0141803	0.00546238	0.0721718	0.200308	0.000513443	0.0133283	0.00431374	0	0.0733769	0	0.11435	0.422082	0	0.0476216	0.0061961	0.01	0.134074	1.03766
TCGA.D8.A1JF	0.121947	0.182668	0.097806	0.118003	0.00676322	0.0344015	0.0160297	0	0	0.10443	0.0716211	0.163272	0.00672608	0.0394495	0.00156751	0.04	0.387435	0.924694
TCGA.D8.A1JG	0.0600843	0.0514389	0.0649455	0.213776	0.0617528	0.0376058	0.0427967	0.0113782	0	0.0888962	0.104475	0.169975	0.0399887	0.0514398	0	0.05	0.171402	1.01205
TCGA.D8.A1JH	0.172044	0.0258409	0.0655324	0.160203	0	0.0342986	0.027765	0.0249369	0.0142598	0.0670316	0.0562933	0.145816	0.0703224	0.135655	0	0.05	0.286731	0.962877
TCGA.D8.A1JI	0.0421979	0.0159464	0.0640992	0.113151	0	0.0681653	0.00810776	0.0204158	0.11951	0	0.0654523	0.381826	0.0355065	0.0394458	0	0.05	0.147386	1.02348
TCGA.D8.A1JJ	0.0168716	0.00606909	0.0634858	0.104745	0.00561371	0.0249237	0.0341895	0	0	0.330292	0.0641316	0.240572	0.0673668	0.0158951	0	0.05	0.338482	0.953688
TCGA.D8.A1JK	0.0275338	0.00863609	0.106654	0.105118	0.0728391	0.0521389	0.0293393	0	0	0.247537	0.136908	0.129783	0.0277756	0.015096	0.00405806	0.02	0.0569165	1.07433
TCGA.D8.A1JL	0.0240562	0.00120535	0.0616866	0.176379	0.0487294	0.0968379	0.0202936	0	0	0.269593	0.101338	0.137717	0	0	0	0.19	0.153605	1.03587
TCGA.D8.A1JM	0.0277903	0.00266986	0.273491	0.0905251	0.0174381	0.163876	0.086192	0.0424332	0.00130636	0.0639824	0.109384	0.0475231	0	0.0482647	0	0.01	0.0951131	1.08365
TCGA.D8.A1JN	0.0494122	0.0169637	0.151387	0.20635	0.00371318	0.0986836	0.0404449	0.0173832	0.0473358	0	0.105901	0.144391	0.0264064	0.0916265	0	0.05	0.126212	1.03949
TCGA.D8.A1JP	0.0320958	0.00913127	0.160294	0.126371	0.00827709	0.0314437	0.07083	0	0.0403316	0.0841148	0.0774669	0.315562	0.00713267	0.0369493	0	0.07	0.105202	1.04501
TCGA.D8.A1JS	0.0359134	0.00667006	0.0738163	0.0613774	0	0.0598478	0.0314826	0.0148116	0.0519632	0.14878	0.0455017	0.392139	0	0.0583393	0.0193579	0.26	0.060743	1.06913
TCGA.D8.A1JT	0.0240981	0.00547578	0	0.105141	0	0.0795012	0	0.0134843	0	0.314513	0.0542134	0.322568	0	0.015965	0.0230121	0.06	0.143423	1.05477
TCGA.D8.A1JU	0.0716196	0.0119169	0.0905729	0.133384	0.0141494	0.0191405	0.00667659	0.0299893	0.0176297	0	0.0707791	0.314016	0.0322039	0.187922	0	0.04	0.144168	1.01974
TCGA.D8.A1X5	0.0120417	0.0213034	0.0604467	0.140667	0.0135359	0.0640664	0.0239435	0	0.146436	0.0596433	0.113689	0.28344	0.00530455	0.0335242	0.00352817	0.05	0.0433448	1.06675
TCGA.D8.A1X6	0	0	0.0653174	0.0665138	0	0.0673679	0.00102986	0.0318755	0.140312	0.0674068	0.0298995	0.49534	0	0.0311841	0	0.07	0.241542	0.997596
TCGA.D8.A1X7	0.0434679	0	0.0609528	0.173605	0.0109884	0.032249	0.0193593	0	0	0.228086	0.0860111	0.236641	0.00354177	0.0666199	0.00283739	0.01	0.203824	1.00601
TCGA.D8.A1X8	0.0682543	0.0171525	0.0603067	0.239468	0.00151677	0.0173687	0.0149196	0	0.0657667	0	0.0851978	0.226163	0.0584962	0.131489	0.00534861	0.08	0.136281	1.02087
TCGA.D8.A1X9	0.00759408	0.00679199	0.0544605	0.233926	0.00991397	0.0785528	0.0435431	0	0	0.151972	0.110711	0.224903	0.0171182	0.0391864	0.00902891	0.05	0.118447	1.04518
TCGA.D8.A1XA	0.0320269	0.00333812	0.0127116	0.134536	0	0.0297322	0.0274199	0.0052396	0	0.34063	0.0749723	0.172986	0	0.139912	0.0264963	0.04	0.0660072	1.07762
TCGA.D8.A1XB	0.0723564	0.0429704	0.0184789	0.160257	0	0.0409806	0.0263265	0.0189698	0.00899268	0.0715732	0.0447489	0.168962	0.0214616	0.303096	0.000826928	0.03	0.186289	1.00746
TCGA.D8.A1XC	0	0	0.0226213	0.103747	0	0.0075444	0.0858568	0.00293129	0.0261912	0.334934	0.0138382	0.12534	0.0063301	0.17795	0	0.1	0.180077	1.02241
TCGA.D8.A1XD	0.173393	0.151698	0.0111136	0.132815	0	0.00793676	0.0388661	0.0157203	0	0.166969	0.0270683	0.183454	0	0.090655	0.000310796	0.07	0.40436	0.915982
TCGA.D8.A1XF	0.0153171	0.129967	0.0210397	0.089335	0.00891654	0.0397956	0.0502626	0	0	0.230559	0.101187	0.222629	0.0037798	0.0680465	0	0.04	0.194818	1.01208
TCGA.D8.A1XG	0.000653909	0	0	0.12874	0	0	0.0323868	0.0372478	0.00368585	0.196486	0.0360085	0.119243	0.122587	0.309394	0	0.01	0.183923	1.01627
TCGA.D8.A1XJ	0.0138004	0	0.0326465	0.101945	0.00797696	0.0442689	0.065321	0	0	0.41792	0.0780091	0.159993	0.00470214	0.059809	0	0.05	0.018051	1.1165
TCGA.D8.A1XK	0.0855325	0.0534787	0.0712328	0.120172	0.0570605	0.0442295	0	0.00274362	0	0.339096	0.0727478	0.0957177	0	0	0.00894318	0.11	0.213085	1.00724
TCGA.D8.A1XL	0.0510933	0.000308005	0.14861	0.149875	0.0475141	0.109601	0.0445746	0.0149285	0.00947244	0.0295804	0.155763	0.145431	0.0381023	0.0390596	0.00661245	0.06	0.0822736	1.06548
TCGA.D8.A1XM	0.0588272	0.0047666	0.112514	0.199671	0.0212034	0.0359391	0.029246	0	0.0044649	0.0505343	0.0973634	0.203331	0.0845753	0.0848233	0.0018028	0.06	0.136106	1.02508
TCGA.D8.A1XO	0.1159	0.00493623	0.103992	0.291564	0.00538964	0.0331017	0.00767622	0	0.00376701	0	0.0546203	0.228055	0.0350683	0.104582	0.0113475	0.29	0.160289	1.01857
TCGA.D8.A1XQ	0	0.0272553	0.0547738	0.227354	0.00110946	0.0692814	0.0336959	0.0121835	0	0.215462	0.088758	0.203541	0.0113512	0.0277342	0.00560028	0.05	0.0579938	1.07076
TCGA.D8.A1XR	0.0273798	0.0052959	0.0420334	0.044408	0	0.0311012	0.0271761	0	0	0.355988	0.0427162	0.238234	0.0702988	0.107745	0	0.04	0.245163	1.00296
TCGA.D8.A1XS	0.0324127	0.00942475	0.05801	0.215976	0.00842857	0.0679847	0.0341988	0	0.0553831	0.0575499	0.0700445	0.281031	0.0136445	0.0736438	0.00342602	0.04	0.0683922	1.05308
TCGA.D8.A1XT	0.0212357	0.000882714	0	0.0783759	0.0118286	0.0707567	0.0228089	0	0	0.347774	0.127933	0.265182	0	0.0344727	0.00106547	0.01	0.348535	0.953127
TCGA.D8.A1XU	0.0762266	0.0108047	0.0495338	0.16693	0.00979161	0.0350475	0.0398237	0	0.0480253	0	0.0845346	0.24002	0.152246	0.0847579	0.00121878	0.04	0.139722	1.01897
TCGA.D8.A1XV	0.0441598	0.0214397	0.00657655	0.133576	0.00441042	0.0281457	0.0220932	0	0.142306	0.0424517	0.0992358	0.364641	0.000861471	0.0584426	0.00191492	0.03	0.135439	1.0312
TCGA.D8.A1XW	0.0507796	0.00649807	0.0262173	0.152908	0.000668788	0.0508002	0.0493341	0.00781114	0.0124039	0.185283	0.0818962	0.333088	0.0051193	0.0363886	0	0.02	0.103752	1.05236
TCGA.D8.A1XY	0.0287967	0.00838853	0.0072786	0.0957577	0	0.0605106	0.014072	0.0189931	0	0.134494	0.0530232	0.311925	0.0569291	0.193145	0.0091312	0.04	0.219595	0.995781
TCGA.D8.A1XZ	0.0533055	0.0118329	0.0488964	0.278507	0	0.0859211	0.0162357	0.0149378	0.0416638	0.0809721	0.0855349	0.184878	0.00705691	0.0586668	0	0.05	0.0798875	1.0537
TCGA.D8.A1Y0	0.0893385	0.00680139	0.0860865	0.289982	0.0146535	0.0689101	0.0308321	0	0.0240297	0	0.103475	0.135035	0.078662	0.0522995	0.0016655	0.01	0.131503	1.03609
TCGA.D8.A1Y1	0.00131265	0	0.0286026	0.241334	0	0.00585963	0.00978205	0	0.113533	0.10412	0.0648202	0.386156	0	0.0326939	0.0067549	0.05	0.128061	1.04248
TCGA.D8.A1Y2	0.0220903	0.00130309	0.0634543	0.0443167	0.0153737	0.0472444	0.0585999	0	0	0.448888	0.0720811	0.122493	0.00949196	0.0391666	0.00382404	0.07	0.0501653	1.10432
TCGA.D8.A1Y3	0.0296124	0	0.103988	0	0.0283681	0.0864785	0.0346472	0.00915615	0.0119799	0.0418223	0.0732668	0.437934	0.0105102	0.113128	0.0143575	0	0.149995	1.0261
TCGA.D8.A27E	0.0355703	0.00848474	0.0852914	0.188547	0.000843058	0.0740329	0.0232314	0.00890051	0.103078	0	0.0823986	0.220794	0.0593161	0.0834525	0	0	0.110747	1.03362
TCGA.D8.A27F	0.183988	0.0301036	0.0161114	0.0802508	0	0.0169274	0.00377738	0	0	0.400643	0.0247219	0.168325	0	0	0	0	0.364764	0.943623
TCGA.D8.A27G	0.0576038	0.0108671	0.108857	0.215662	0.00038207	0.0991556	0.0393457	0.00860537	0	0.105115	0.120978	0.156994	0.00821952	0.0573034	0	0	0.178798	1.01886
TCGA.D8.A27H	0.0855342	0.0101564	0.0434649	0.156678	0.00083096	0.0440598	0.034681	0.00142879	0	0.244583	0.0928778	0.185596	0.00717433	0.0851951	0.00773982	0.02	0.11403	1.04298
TCGA.D8.A27I	0.0955424	0.00852781	0.122412	0.1328	0.0331109	0.0345587	0.0325553	0	0.00085604	0.00274205	0.0737428	0.152759	0.127145	0.177433	0.00340437	0.53	0.151553	1.01423
TCGA.D8.A27K	0.112279	0.0370496	0.0874035	0.270468	0.00653989	0.0792839	0.0458371	0	0.08088	0	0.0860075	0.117447	0.0275268	0.0422758	0	0.06	0.183555	1.01428
TCGA.D8.A27L	0.110217	0.0569512	0.0608	0.167109	0.00736115	0.0481837	0.0551554	0.00518236	0.00478493	0.0496633	0.101302	0.142258	0.0481049	0.134502	0.00842461	0.02	0.226187	0.988215
TCGA.D8.A27M	0.0605528	0.0483675	0.0742379	0.164351	0.0500998	0.0772936	0.0403833	0.00640686	0.0104733	0.0471867	0.16714	0.135499	0.0254266	0.060158	0.00284509	0.01	0.228863	0.994605
TCGA.D8.A27N	0.117574	0.0479318	0.0464367	0.102156	0	0.0343021	0.0535337	0	0	0.322343	0.0234149	0.196953	0	0.0537861	0.00156981	0.07	0.207711	1.01118
TCGA.D8.A27P	0.0542914	0.0121052	0.0300055	0.0549799	0	0.0669978	0.0150806	0	0	0.384313	0.0273733	0.15325	0.0396979	0.156538	0	0.03	0.0902807	1.07128
TCGA.D8.A27R	0.0846213	0.0241875	0.155403	0.134942	0.00967098	0.0342712	0.0641241	0.00986018	0.0167335	0.00692284	0.117609	0.219386	0.0294578	0.0928104	0	0.06	0.165514	1.01669
TCGA.D8.A27T	0.102572	0.0356893	0.110961	0.208355	0.0252932	0.0402671	0.0184897	0	0.00656195	0.0798642	0.129619	0.109813	0.0100851	0.0992896	0.00163462	0.07	0.197952	1.00518
TCGA.D8.A27V	0.148235	0.0397802	0.0981365	0.23101	0.0218036	0.0249784	0.0154854	0	0.000856191	0	0.109194	0.173033	0.0845193	0.0361571	0	0.05	0.265993	0.976131
TCGA.D8.A27W	0.104216	0.196425	0.125852	0.0605402	0.0140571	0.0245378	0.0256333	0.0265699	0.000381542	0.0678529	0.0794962	0.189038	0.0296024	0.0557967	0	0.08	0.395962	0.920107
TCGA.D8.A3Z5	0.0708303	0.205062	0.141878	0.128623	0	0.0917716	0.036824	0.0625969	0.0152759	0	0.078374	0.0799658	0.0471053	0	0.00179771	0.06	0.342475	0.952138
TCGA.D8.A3Z6	0.118475	0.0275362	0.118634	0.117381	0	0.0184491	0.135454	0	0.0200229	0.165459	0.0819717	0.0882636	0.00651259	0.10184	0	0.02	0.19997	1.00294
TCGA.D8.A4Z1	0.0885493	0.0382617	0.154672	0.159238	0	0.0582909	0.0175073	0.0115942	0.0137888	0	0.0732448	0.119123	0.0373734	0.189594	0	0.04	0.18397	1.00874
TCGA.D8.A73U	0.0249853	0.00409248	0.26117	0.136595	0.0190908	0.0646021	0.0675998	0.00287876	0.0158133	0.108575	0.0822436	0.0852523	0.0293525	0.0676871	0.00426031	0.01	0.0497079	1.07953
TCGA.D8.A73W	0.00723934	0	0.0515084	0.0614961	0.0135358	0.0476844	0.0831759	0	0	0.373545	0.0516673	0.22174	0.00119173	0.0522704	0	0.02	0.0143999	1.11175
TCGA.D8.A73X	0.0728287	0.0299593	0.0620852	0.00827415	0	0.0399557	0.0697781	0	0	0.351129	0.0406975	0.185516	0	0.13692	0.00285542	0	0.150193	1.03882
TCGA.E2.A105	0.0594661	0.013571	0.0513974	0.0757198	0.00325647	0.0599996	0.0371353	0.0127361	0	0.412304	0.0900794	0.138332	0.00953369	0.0346418	0.00182734	0.07	0.120102	1.06512
TCGA.E2.A106	0.092038	0.0399307	0.0606929	0.158642	0	0.147811	0	0.00509236	0	0.0602423	0.196209	0.190396	0.0308316	0.0171714	0.000943509	0.07	0.155328	1.03672
TCGA.E2.A107	0.0425049	0.00383831	0.146939	0.188514	0	0.0251798	0.100729	0	0.0131542	0.0668152	0.0802463	0.138884	0.0287732	0.163856	0.000567082	0.01	0.195726	1.00561
TCGA.E2.A108	0.0457231	0.00078505	0.19766	0.152968	0.0332329	0.0823862	0.0485554	0.00913034	0.00510293	0.0538757	0.0984218	0.120692	0.0269954	0.112216	0	0.07	0.0858749	1.05689
TCGA.E2.A109	0.106665	0.126539	0.07492	0.210478	0.00976361	0.0452093	0.0499258	0.00172846	0	0.140621	0.0773497	0.114922	0.00104206	0.0405907	0	0.14	0.308491	0.960304
TCGA.E2.A10A	0.0651643	0.0413747	0.00963541	0.128607	0	0.0162457	0.021591	0.00840111	0	0.404383	0.0388349	0.252798	0.00161727	0.0038049	0.00483657	0	0.259029	1.00333
TCGA.E2.A10B	0.0165734	0	0.12506	0.113596	0.0131149	0.0194434	0.0848194	0	0.0250588	0.115357	0.107162	0.150248	0.0742214	0.139145	0	0.02	0.0944579	1.04175
TCGA.E2.A10C	0.130319	0.0176681	0.146326	0.0926931	0.0146573	0.0726365	0.134013	0	0	0.172307	0.0567674	0.109014	0	0.0414772	0	0.05	0.192685	1.01207
TCGA.E2.A10E	0.0641514	0.0195939	0.0862422	0.22704	0.00901516	0.0980414	0.0184432	0	0.00590628	0.0587747	0.152513	0.107016	0.0898079	0.0424588	0.00129035	0.03	0.137674	1.03527
TCGA.E2.A10F	0.1454	0.0311824	0.031021	0.270713	0	0.0313886	0.0622492	0	0.0230977	0.121137	0.087381	0.0671523	0.0325469	0.0960021	8.73722e-05	0.03	0.275635	0.970817
TCGA.E2.A14N	0.0684426	0.0054256	0.0375897	0.409172	0.00700951	0.0788112	0.00869496	0	0.0139883	0.0898829	0.191125	0.00229928	0	0	0	0.02	0.328591	0.965619
TCGA.E2.A14O	0.0254861	0.00289868	0.0569485	0.0753148	0	0.0628988	0.0436485	0.028269	0	0.43186	0.117242	0.0641057	0.0192113	0.0721168	0	0.1	0.152153	1.05179
TCGA.E2.A14P	0.0848199	0.0139248	0.0849625	0.195789	0	0.0800312	0.0727332	0.0163229	0	0.156231	0.123657	0.107838	0.00795861	0.0557324	0	0	0.117245	1.04477
TCGA.E2.A14Q	0.066652	0.0113945	0.179889	0.310288	0.00769943	0.0249673	0.00251423	0.00376265	0.00271413	0	0.13775	0.108366	0.0264398	0.106847	0	0.06	0.109511	1.05708
TCGA.E2.A14R	0.0246906	0.00514457	0.089159	0.0169434	0.00237637	0.0963396	0.0360392	0.0678793	0	0.313457	0.16419	0.0905539	0.0150676	0.0392203	0	0.01	0.0383334	1.09896
TCGA.E2.A14S	0.039488	0.0113988	0.0596094	0.17727	0.00495323	0.029826	0.0626309	0	0.0454567	0.188243	0.0515328	0.273628	0	0.0169602	0	0.02	0.0991903	1.04971
TCGA.E2.A14T	0.0539164	0.00633871	0.0385257	0.0538503	0	0.0293311	0.0166675	0	0	0.621328	0.044159	0.0999031	0	0.0359798	0	0.04	0.21622	1.06062
TCGA.E2.A14U	0.0951544	0.0142813	0.124695	0.220062	0	0.0781829	0.0210396	0.000112841	0.0101649	0.0239659	0.0501471	0.326296	0	0.00346471	0	0.03	0.147635	1.02985
TCGA.E2.A14V	0.058865	0.0179664	0.0730648	0.199074	0	0.0671698	0.020634	0.014765	0	0.129948	0.113992	0.0860545	0.0177024	0.182031	0.00150563	0.01	0.13401	1.0297
TCGA.E2.A14W	0.00932332	0	0.0801799	0.0493206	0	0.0523739	0.00152983	0.00758694	0	0.399165	0.0488914	0.290596	0	0	0.0102511	0.04	0.099685	1.09387
TCGA.E2.A14X	0.0637978	0.0528088	0.0726874	0.184178	0.0215275	0.131424	0.0560976	0	0.0178515	0.0765496	0.136657	0.102457	0.0125937	0	0	0.03	0.17188	1.02651
TCGA.E2.A14Y	0.00730754	0.0501411	0	0.0659849	0.00161222	0.124606	0	0.0258906	0	0.35553	0.104864	0.124452	0	0	0.00177086	0	0.0671552	1.0872
TCGA.E2.A14Z	0.0385419	0.00257049	0.167455	0.109895	0.0233542	0.108402	0.0732897	0.0285872	0.0167247	0.0425029	0.107884	0.145316	0.0425503	0.0929258	0	0.01	0.130282	1.03604
TCGA.E2.A150	0.0106307	0.00151948	0.0391991	0.138105	0.0292583	0.0715902	0.065382	0	0	0.295417	0.159698	0.112309	0.0194001	0.0515485	0	0.08	0.275075	0.983106
TCGA.E2.A152	0.0526806	0.018594	0.0494954	0.133124	0.0223978	0.021936	0.0746169	0	0	0.283302	0.0223815	0.240146	0	0.0813253	0	0.01	0.198432	1.01171
TCGA.E2.A154	0.0102167	0	0.00671516	0.148974	0	0.0452969	0.00978909	0.0125173	0	0.197847	0.0490227	0.377381	0	0.132468	0.00977299	0.05	0.112337	1.05307
TCGA.E2.A155	0.0773826	0.00651733	0.0495769	0.145032	0	0.0800087	0.00618639	0.0305599	0	0.156358	0.0955006	0.136219	0	0.216658	0	0.54	0.0958816	1.04367
TCGA.E2.A156	0.000416259	0.00182931	0	0.193311	0	0.0147077	0.010523	0.0563677	0.0214322	0.193803	0	0.343993	0.00828185	0.14551	0	0.02	0.165935	1.02641
TCGA.E2.A159	0.0591884	0.0144352	0.174913	0.159695	0.109372	0.0292283	0.0177432	0	0.0124749	0.118665	0.0825654	0.151244	0.027575	0.0344096	0.00439029	0.01	0.108165	1.03918
TCGA.E2.A15A	0.0723661	0.0151186	0.165699	0.165724	0.0129865	0.0544474	0.0412255	0	0.0132486	0.11731	0.109779	0.112262	0.00794745	0.0728778	0	0.01	0.114285	1.04209
TCGA.E2.A15C	0.1162	0.0247978	0.124092	0.188392	0	0.123209	0.013374	0	0	0.0866514	0.126851	0.106016	0.0154514	0.0714983	0.00346712	0.07	0.165301	1.02399
TCGA.E2.A15D	0.0870296	0.00480201	0.172034	0.139452	0	0.10464	0.0261916	0.0139826	0.00280996	0.110756	0.120485	0.122241	0.015825	0.0775813	0	0.07	0.136747	1.03509
TCGA.E2.A15E	0.121488	0.0324682	0.0814091	0.156664	0	0.0365955	0	0.0319178	0.0113919	0.0433413	0.0945344	0.145027	0.0309599	0.214203	0	0	0.225412	0.989098
TCGA.E2.A15F	0.100174	0	0.0745256	0.174787	0	0.0518445	0.0836683	0	0	0.277003	0.06999	0.0266179	0	0.0910853	0.00779384	0.04	0.154348	1.02788
TCGA.E2.A15G	0.0764488	0.0109503	0.0871155	0.170043	0	0.0641613	0.0272788	0	0.0904737	0	0.0712155	0.209538	0.0536728	0.136095	0	0.03	0.117545	1.02724
TCGA.E2.A15H	0.234862	0.176874	0.121294	0.0962803	0	0.030505	0.0224058	0	0.0176671	0.13549	0.0816054	0.0269688	0.00148398	0.0545635	0	0.04	0.447015	0.897206
TCGA.E2.A15J	0.00279154	0	0.0243329	0.054003	0	0.0845415	0	0.0324819	0.0444264	0.287526	0.0303624	0.299084	0	0.0320932	0.00124356	0.04	0.0362979	1.09795
TCGA.E2.A15L	0.0652129	0.0712565	0	0.0633738	0	0.0542837	0.0184758	0.000517683	0.010234	0.249632	0.039448	0.356248	0	0.0713176	0	0.05	0.157365	1.03745
TCGA.E2.A15O	0.0718712	0.00672343	0.146842	0.0827973	0.000423631	0.0437571	0.106052	0	0	0.249552	0.100067	0.0790584	0.0235042	0.0893531	0	0.03	0.176628	1.01767
TCGA.E2.A15P	0.140062	0.0194613	0.109249	0.0792061	0.0038533	0	0.0968622	0	0.00734051	0.068774	0.120048	0.104058	0.0416219	0.208748	0.000716611	0.04	0.224081	0.991628
TCGA.E2.A15R	0.0677647	0.0350974	0.134164	0.168475	0	0.011892	0	0.0272262	0.0370029	0.00671746	0.0456913	0.262128	0.0148094	0.180718	0.00831364	0.01	0.0563833	1.0522
TCGA.E2.A15S	0.0424707	0.0247625	0.131738	0.0226942	0	0.0210192	0.0574895	0.0566896	0	0.330892	0.0437019	0.150301	0.0171117	0.101129	0	0.01	0.112335	1.05114
TCGA.E2.A15T	0.0813872	0.00288166	0.0147473	0.0695925	0.000502097	0.073666	0.0448836	0.0104646	0	0.459514	0.0678408	0.116942	0.0103007	0.0472778	0	0.02	0.11305	1.07499
TCGA.E2.A1AZ	0.105454	0.013576	0.0547473	0.324631	0.07788	0.0630736	0	0	0.0265856	0.021312	0.145224	0.0710768	0.0154966	0.0485295	0	0.06	0.174832	1.02373
TCGA.E2.A1B0	0.0624368	0.00747086	0.0784428	0.176194	0.0263326	0.0955786	0	0	0	0.280509	0.0929266	0.112466	0.00967123	0.0308061	0	0.05	0.0622131	1.07095
TCGA.E2.A1B1	0.0664221	0.0062012	0.0709153	0.217826	0.032263	0.0680815	0.00845009	0	0	0.154835	0.106338	0.124709	0.0529953	0.0544226	0	0.04	0.139644	1.02838
TCGA.E2.A1B4	0.0646677	0.0161392	0.0445011	0.222344	0	0.0759058	0.0466012	0.0213997	0	0.0837839	0.0690536	0.122038	0	0.178454	0.00410231	0.07	0.127456	1.03017
TCGA.E2.A1B5	0.0936672	0.0721147	0.140785	0.168206	0.0171822	0.0755301	0.119056	0.0529794	0.0117301	0.0279757	0.076565	0.0651921	0.0163086	0.0627078	0	0.05	0.238347	0.997278
TCGA.E2.A1B6	0.121247	0.0146162	0.155376	0.00421246	0.116259	0.0644816	0.176156	0.00458453	0	0.0787681	0.0927888	0.0330173	0	0.0208194	0	0.05	0.293331	0.971123
TCGA.E2.A1BD	0.0954318	0.0111165	0.142592	0.100821	0	0.096628	0.0373546	0.0127865	0	0.108056	0.122528	0.194206	0.00627126	0.0692043	0.0030044	0.06	0.16814	1.01857
TCGA.E2.A1IE	0.129604	0.0865771	0.0546326	0.146207	0	0.0303793	0.0414912	0.0204848	0.00324101	0.151241	0.0853512	0.177877	0.00363053	0.0692832	0	0.03	0.266087	0.975505
TCGA.E2.A1IF	0.186526	0.0201222	0.083865	0.0346698	0	0.0851282	0.108255	0	0.0102708	0.309024	0.0560294	0.0731587	0.00552829	0	0	0.03	0.249946	0.991585
TCGA.E2.A1IH	0.0560361	0	0.134538	0.151351	0.0334347	0.0813569	0.0292021	0	0.00263472	0.208803	0.0871664	0.0677939	0.0204613	0.0673408	0	0.03	0.103736	1.04703
TCGA.E2.A1II	0.01986	0.00746758	0.271457	0.168619	0.124687	0.081833	0.0172301	0.000154943	0.000543794	0.0215111	0.127943	0.0934755	0.0223745	0.0136999	0.00663224	0.02	0.0733709	1.08571
TCGA.E2.A1IJ	0.123168	0.0472578	0.126715	0.189463	0	0.0950037	0.0517132	0.00773416	0.00398945	0.0154092	0.0985943	0.118916	0.0258368	0.0908232	0.00537594	0.01	0.235414	0.992196
TCGA.E2.A1IK	0.0409551	0	0.15726	0.105201	0.0101598	0.075771	0.091364	0.0317136	0	0.160425	0.125791	0.139496	0.0102572	0.0447537	0	0	0.06032	1.07265
TCGA.E2.A1IL	0.156302	0.0775087	0.0636788	0.109064	0.000325311	0.0453748	0.012637	0.00131859	0	0.132328	0.101307	0.183916	0.00411137	0.0864951	0.00257828	0.06	0.311894	0.955821
TCGA.E2.A1IN	0.0566142	0.00734511	0.0168749	0.202857	0	0.0592219	0.00519315	0	0.0879902	0	0.0609124	0.314493	0	0.148448	0.00250329	0.01	0.160401	1.01317
TCGA.E2.A1IO	0.0775493	0.0106887	0.0916324	0.264287	0	0.0831504	0.0616351	0	0	0.0756282	0.100566	0.0889348	0.0530326	0.0905741	0	0.04	0.110619	1.04601
TCGA.E2.A1IU	0.109332	0	0.106316	0.14159	0	0.0952819	0.06716	0.000920256	0	0.0786319	0.108296	0.140536	0.0332179	0.106552	0	0.02	0.143406	1.02662
TCGA.E2.A1L6	0.113106	0.00950225	0.0398055	0.117752	0	0.069431	0.018725	0	0	0.312988	0.0758004	0.147446	0	0.0313473	0.00375674	0	0.484636	0.874457
TCGA.E2.A1L8	0.165231	0.0729993	0.0528948	0.160609	0.0151366	0.0613953	0.0106223	0	0	0.000814773	0.106481	0.0214635	0.290552	0.0285492	0	0.05	0.290777	0.966541
TCGA.E2.A1L9	0.0350097	0.0055806	0.0346691	0.0907674	0.00740786	0.0268495	0.0360605	0	0	0.444012	0.0391115	0.189392	0	0	0.00486712	0	0.317601	0.974175
TCGA.E2.A1LA	0.0441034	0.0476857	0.18961	0	0.0126942	0.121826	0.0527096	0.0706342	0	0.144589	0.0939759	0.0810443	0.0490007	0.0811819	0.0029566	0.01	0.133563	1.03271
TCGA.E2.A1LE	0.0241456	0	0.212612	0.14569	0	0.0762566	0.0966808	0.0142367	0	0.1592	0.108577	0.120734	0.0205377	0.0213288	0	0.02	0.229021	1.00432
TCGA.E2.A1LG	0.0607034	0.0769809	0.0942142	0.0139121	0.00463758	0.164744	0.0174078	0	0	0.181172	0.192845	0.0887924	0.0550707	0.031961	0	0.06	0.219907	1.00659
TCGA.E2.A1LI	0.0777588	0.00633031	0.00916999	0.199267	0.00739664	0.0808162	0.0462703	0.00982072	0	0.272073	0.186109	0.0576435	0.00263486	0	0	0.07	0.0974039	1.07177
TCGA.E2.A1LK	0	0	0.0360293	0	0	0.0258087	0.0303272	0.0124529	0	0.616337	0.0120434	0.177713	0	0	0	0.07	0.0815438	1.15357
TCGA.E2.A1LL	0.0562147	0	0.0556693	0.0907637	0.00311538	0.118882	0.034475	0	0.00134346	0.305974	0.0702156	0.133029	0.10654	0.0189839	0	0.03	0.0680406	1.07163
TCGA.E2.A2P5	0.0275693	0.007189	0.11539	0.260097	0	0.0457452	0.111665	0.0152134	0.0099474	0.0568793	0.123888	0.0336298	0.0213909	0.171396	0	0.03	0.197801	1.01657
TCGA.E2.A2P6	0.11068	0.0151201	0.0114472	0.238398	0	0.0817749	0.0169938	0.0194172	0.0962853	0	0.110729	0.208447	0	0.0907076	0	0	0.149932	1.02051
TCGA.E2.A3DX	0.0824893	0	0.248616	0.243078	0.0242632	0.0329069	0.0263401	0.00679466	0.0114466	0.0230738	0.0654601	0.108244	0.0486131	0.0786742	0	0.03	0.111655	1.05291
TCGA.E2.A56Z	0.0396596	0.00730416	0.0556755	0.16484	0	0.0779091	0.071934	0.0217191	0	0.262646	0.130118	0.0914882	0	0.0536055	0	0.04	0.307338	0.963382
TCGA.E2.A570	0.0710504	0.0112184	0.0604929	0.183489	0	0.0729932	0.0285542	0.0307766	0.0306317	0.0755976	0.0635474	0.242187	0.00275021	0.0881596	0.0210421	0.02	0.137568	1.02315
TCGA.E2.A572	0	0.139334	0.154833	0.0196707	0.0111854	0.0600786	0.0417287	0	0.0300914	0.183016	0.0268394	0.0883746	0.0114726	0.227929	0	0.01	0.270001	0.973897
TCGA.E2.A573	0.0461712	0.00713633	0.118808	0.0515345	0.0129547	0.115964	0.123993	0.0257599	0	0.25646	0.113734	0.0904398	0.00321978	0.0185874	0.0060944	0.07	0.0637363	1.07635
TCGA.E2.A574	0.0811553	0	0.108208	0	0	0.0720681	0.0135789	0.0313285	0	0.51854	0.00631727	0.0997699	0	0.00103063	0	0.01	0.147603	1.07251
TCGA.E2.A576	0.06163	0.150248	0.103381	0.0568472	0	0.0649069	0.137698	0.055973	0.00505298	0.0248983	0.0683237	0.0578759	0.0216372	0.185369	0	0.04	0.300672	0.964358
TCGA.E2.A9RU	0.0607299	0.0056675	0.00978493	0.140411	0	0.0487719	0.0460299	0	0	0.342764	0.0749839	0.164769	0	0.0265068	0.0038086	0.01	0.135719	1.04599
TCGA.E9.A1N3	0.0574721	0.0198853	0.019385	0.118778	0	0.059494	0.0234858	0.00829247	0.0815048	0.0161011	0.0539879	0.364386	0.0393071	0.12883	0.00909011	0	0.0962355	1.03922
TCGA.E9.A1N8	0.0817047	0.00215507	0.0846461	0.0371612	0	0.126164	0.0101108	0.0256232	0	0.337103	0.200827	0.0945052	0	0	0	0.02	0.22303	1.02112
TCGA.E9.A1NC	0.106089	0.124176	0.123735	0.0874369	0.00672292	0.0649273	0.0572565	0.0448716	0.00695699	0.141018	0.138737	0.0647373	0.0124937	0.0208416	0	0.01	0.291065	0.972096
TCGA.E9.A1NE	0.0890824	0.000394423	0.214057	0.269642	0.0461632	0.109864	0.0189068	0	0.0101383	0	0.0974141	0.0762205	0.0158517	0.0420697	0.00345933	0.08	0.161633	1.04515
TCGA.E9.A1NH	0.0559796	0.0089977	0.113543	0.156315	0	0.0477024	0.0400485	0	0.0274802	0.193303	0.068539	0.121019	0.119039	0.0468754	0.00115897	0.04	0.105058	1.0407
TCGA.E9.A1NI	0.0154499	0.00247659	0.00598513	0.069666	0	0.0886043	0.0167252	0.0238474	0	0.383209	0.0499516	0.265529	0.0224921	0.0513481	0.00471481	0.03	0.378961	0.936577
TCGA.E9.A1QZ	0.0547178	0.0213523	0.171805	0.261022	0.0500113	0.0665505	0.013929	0	0	0.000823944	0.0977184	0.106674	0.0215579	0.0897534	0.00186801	0.02	0.15914	1.0311
TCGA.E9.A1R0	0.0848302	0.00390911	0.173078	0.0390354	0.000168823	0.106439	0.0691998	0.00987249	0.00403791	0.122251	0.0290273	0.141231	0.0483771	0.14887	0	0.05	0.120763	1.0309
TCGA.E9.A1R2	0.104759	0.0049794	0.131941	0.159395	0	0.11524	0.110495	0	0.0134855	0.0291059	0.167298	0.0697834	0.0126531	0.068119	0	0.05	0.232506	1.00543
TCGA.E9.A1R3	0.0170543	0	0.0138456	0.192712	0.0169959	0.0199991	0.0233814	0	0	0.196792	0.110385	0.187816	0.152868	0.0495206	0.0154278	0	0.112066	1.04577
TCGA.E9.A1R4	0.0147275	0.00590348	0.102073	0.19754	0.0182359	0.072454	0.0630346	0	0.0197471	0.0468169	0.106486	0.218078	0.0354759	0.0774747	0.00601486	0	0.136026	1.03099
TCGA.E9.A1R5	0.0386164	0.0150351	0.0364838	0.179887	0	0.0317777	0.0247272	0	0	0.27361	0.0873099	0.159582	0.00734624	0.131026	0.00852141	0.05	0.122864	1.04102
TCGA.E9.A1R6	0.0404951	0.00950948	0.0267342	0.0764967	0	0.0299752	0.0459743	0.00348971	0	0.356214	0.0748267	0.236628	0	0.0787242	0.0148474	0.04	0.195005	1.02573
TCGA.E9.A1RA	0.105405	0	0.0489489	0.176003	0	0.0693918	0.0622474	0.0330647	0	0.211725	0.105765	0.117146	0.00221266	0.0680909	0	0.04	0.114403	1.0429
TCGA.E9.A1RE	0.073122	0.0135841	0.0534728	0.189304	0	0.0343721	0.0359502	0.0139275	0	0.219473	0.0571743	0.116861	0.00429385	0.173344	0	0.01	0.121107	1.03416
TCGA.E9.A1RG	0.0236757	0.00107143	0.101171	0.0645891	0	0.0292326	0.0884336	0.0860042	0.00260039	0.107404	0.108741	0.195637	0.0568038	0.125423	0.00921315	0.02	0.0585784	1.06084
TCGA.E9.A226	0	0.0182995	0	0.21828	0	0.085501	0.00636954	0	0	0.25048	0.0607711	0.264859	0	0.0654736	0	0.07	0.108363	1.05249
TCGA.E9.A227	0.0752269	0.0154322	0.140181	0.2151	0.00751266	0.0254108	0.0162616	0.0142577	0.0150733	0.0228167	0.0707622	0.189799	0.0847508	0.0697525	0	0.03	0.203282	0.99953
TCGA.E9.A228	0	0	0.0424714	0.0155892	0.00132593	0.00182629	0.00550609	0	0	0.613652	0.0147544	0.240941	0	0.0556346	0	0.05	0.689571	0.725438
TCGA.E9.A229	0.0594951	0.0190823	0.0393371	0.177312	0.00204825	0.0578249	0.0234515	0.0120591	0.0786798	0.0812974	0.105923	0.209563	0.00646343	0.0999664	0.00697805	0.07	0.122337	1.02871
TCGA.E9.A22A	0.0540179	0.0417961	0.209414	0.0697956	0.0283819	0.0421068	0.0569918	0	0	0.121271	0.0797517	0.163022	0.00148864	0.091496	0.00776868	0.05	0.182447	1.00863
TCGA.E9.A22B	0.0430649	0.00910013	0.095341	0.181198	0.0120334	0.080269	0.0361722	0	0	0.0885311	0.117483	0.173394	0.0460487	0.0617976	0.0465216	0.09	0.185616	1.00903
TCGA.E9.A22D	0.0308367	0.0135009	0.397356	0	0.172248	0.0696053	0.0216019	0	0.000690946	0.0434549	0.0811008	0.0756114	0.020999	0.0409268	0.00166212	0.04	0.103985	1.06571
TCGA.E9.A22E	0.0371118	0.00682595	0.184904	0.134381	0.018851	0.0327652	0.0724632	0	0	0.227127	0.0760484	0.138111	0	0.0450137	0	0.07	0.166566	1.02593
TCGA.E9.A22G	0.0270129	0.00371199	0.0520393	0.0720711	0.0267772	0.123502	0.0229546	0	0	0.30877	0.047731	0.113635	0	0.0157253	0	0.02	0.281046	0.980382
TCGA.E9.A22H	0.0559002	0.00649306	0.0878525	0.170375	0.0185104	0.114096	0.0141617	0.0160973	0.00400727	0.0348586	0.0991951	0.228776	0.0263022	0.0749738	0.00676111	0.04	0.114083	1.03727
TCGA.E9.A243	0.023033	0.0147165	0.087577	0.145986	0.0340949	0.0710952	0.0220245	0.00540621	0	0.105903	0.136555	0.131919	0.0453842	0.0684661	0.0142254	0.04	0.0600903	1.06395
TCGA.E9.A244	0.0455406	0	0.0973873	0.183741	0.0333781	0.0730007	0.0113968	0	0	0.289271	0.110906	0.109714	0	0	0	0.03	0.0535647	1.08288
TCGA.E9.A247	0.103777	0.0230074	0.0774255	0.06016	0.00219325	0.0603422	0.0543027	0.000357692	0	0.191668	0.120571	0.184234	0.0122786	0.106004	0	0.03	0.191962	1.00743
TCGA.E9.A248	0.0307933	0.164853	0.165854	0.142835	0.0575604	0.0233854	0.0600211	0	0	0.10425	0.0847957	0.108932	0.014439	0.0162455	0.00564878	0.04	0.287085	0.971519
TCGA.E9.A249	0.07718	0.00822091	0.069094	0.13855	0	0.138135	0.0298535	0.00435643	0	0.204428	0.107111	0.149556	0.0282262	0.0309109	0.00241675	0.07	0.141354	1.03346
TCGA.E9.A24A	0.048966	0.00850344	0.0296322	0.131168	0.00902097	0.033018	0.0134688	0	0.0611247	0.108716	0.0829085	0.398013	0.0149565	0.038313	0.00593856	0.02	0.405686	0.914087
TCGA.E9.A295	0.0552192	0.0156866	0.11329	0.189477	0.0207294	0.0301566	0.0507922	0	0.0008539	0.00842728	0.139305	0.145373	0.103123	0.124474	0	0	0.215315	0.996041
TCGA.E9.A2JS	0.00975697	0.00646413	0.142334	0.103154	0	0.0580625	0.0659298	0.0100528	0.0250773	0.123844	0.126933	0.196404	0.00233599	0.126202	0.00344964	0.04	0.118291	1.03956
TCGA.E9.A2JT	0.192666	0.0580621	0.199004	0.131445	0.0130776	0.062355	0.0547269	0.00459808	0.00196744	0.0479994	0.0686807	0.0157977	0	0.0212796	0	0.04	0.426364	0.910153
TCGA.E9.A3HO	0.0310696	0.00390337	0.161978	0.124564	0	0.0768672	0.109302	0.0626002	0.023488	0.103666	0.116087	0.0491527	0.036159	0.101163	0	0.03	0.218551	1.0033
TCGA.E9.A3Q9	0.0555262	0.0885744	0.154087	0.139534	0	0.0581075	0.00130085	0.0296337	0.134341	0	0.0452509	0.256667	0	0.0369766	0	0.05	0.230422	0.988552
TCGA.E9.A3QA	0.0253522	0.0177305	0.0943307	0.0569749	0.0610201	0.0599049	0.135763	0.0280231	0.00443146	0.150075	0.201654	0.0532662	0.0115651	0.0146965	0	0.06	0.0898287	1.07719
TCGA.E9.A3X8	0.0476419	0.160842	0.209518	0	0	0.0457475	0.151697	0.0782997	0.00463385	0.0205642	0.0903099	0.0664349	0.0232238	0.098306	0.00278114	0.04	0.290145	0.974656
TCGA.E9.A54X	0	0	0.017468	0	0	0.132031	0.0170543	0.0121787	0	0.5115	0.0319629	0.206991	0	0.0578865	0	0.06	0.0651019	1.12591
TCGA.E9.A54Y	0.298784	0.0358219	0.0875717	0	0.0162156	0.0187183	0.113538	0	0	0.215127	0.0680454	0.0808713	0	0.0483701	0.0169361	0.02	0.368783	0.934709
TCGA.E9.A5FK	0.0445552	0.0183547	0.187661	0.0641893	0.0278739	0.108036	0.204672	0.0383555	0	0.0271867	0.088513	0.0575137	0.0156818	0.0723772	0.00074656	0.05	0.116552	1.06361
TCGA.E9.A5FL	0.00830244	0	0.0535027	0.0641855	0	0.0402691	0.0555264	0.0447782	0.0061743	0.0247215	0.0595339	0.43727	0.107369	0.0674489	0	0	0.283293	0.970392
TCGA.E9.A5UO	0.00313821	0.00474516	0	0.0539165	0.00183832	0.00506061	0.0118973	0	0.00388579	0.446404	0.0132686	0.157064	0	0.19214	0	0.04	0.308506	0.977944
TCGA.E9.A5UP	0	0.00499502	0.00914966	0	0	0.0981908	0.0338641	0.026397	0	0.560922	0	0.0679924	0	0.00418498	0.000442016	0.01	0.24023	1.03692
TCGA.E9.A6HE	0.00272071	0.0502461	0.119536	0.0793725	0	0.132892	0.0641542	0.0504553	0.0592195	0.123509	0.0562501	0.158075	0	0.0694855	0.00642927	0.24	0.146823	1.02304
TCGA.EW.A1IW	0.126061	0	0.0457694	0.261686	0.0139046	0.0498773	0.0364997	0	0.00876617	0.101086	0.116869	0.108637	0.0357688	0.0876417	0	0.04	0.193567	1.00619
TCGA.EW.A1IX	0.088871	0.00301329	0.0250729	0.158853	0	0.0527424	0.0398172	0.0168922	0.0110477	0.181566	0.0238236	0.140195	0.0619761	0.0416384	0.00636043	0.04	0.121747	1.03583
TCGA.EW.A1IY	0.0383805	0.00281408	0.0615367	0.265246	0.0291285	0.0957656	0.0300768	0.0203383	0	0.00254005	0.12858	0.106027	0.0979864	0.041586	0	0.05	0.122471	1.04721
TCGA.EW.A1IZ	0.0661221	0.0406002	0.283355	0.0046305	0.0451278	0.113011	0.0293526	0.0751701	0	0.0397447	0.0677177	0.067622	0.00967932	0.0493907	0.000615643	0.01	0.142526	1.05567
TCGA.EW.A1J1	0.0310354	0.00505584	0.0968307	0.23453	0.0204279	0.0649812	0.0486164	0	0	0.127636	0.109686	0.20418	0.0109407	0.0339433	0.00603623	0.05	0.0633839	1.06806
TCGA.EW.A1J2	0.0415342	0.0098488	0.141931	0.140703	0.0174576	0.0689489	0.00576146	0.000253384	0.0413266	0.10535	0.115191	0.160388	0.0303102	0.0944859	0	0.01	0.148979	1.02207
TCGA.EW.A1J3	0.0564468	0.0225599	0.0443122	0.213594	0	0.0956005	0	0.0494721	0.050605	0.0492083	0.106473	0.171532	0.00162949	0	0.0222876	0.03	0.221414	0.995647
TCGA.EW.A1J5	0.057003	0.002911	0.102254	0.232762	0.0404015	0.0813305	0.0247537	0	0.00479775	0.0557275	0.148945	0.144745	0.00747892	0.0935424	0	0.01	0.158603	1.02749
TCGA.EW.A1J6	0.110355	0	0.0752756	0.199106	0.0612938	0.0952104	0.0212627	0	0.0167015	0.0195546	0.143479	0.179198	0.00856495	0.0245303	0	0.32	0.249843	0.987245
TCGA.EW.A1OV	0.0743994	0.030572	0.22945	0.108169	0.0427098	0.0790515	0.0906676	0.0172202	0	0.114675	0.0773692	0.0945345	0.00470672	0.0346919	0	0.01	0.150626	1.03497
TCGA.EW.A1OW	0.101482	0.011769	0.0385928	0.0662509	0	0.100713	0.0413352	0.0161287	0	0.301264	0.0944067	0.108105	0.0790866	0.0299337	0	0.03	0.136812	1.03866
TCGA.EW.A1OX	0.0731264	0.0220436	0.0932086	0	0	0.0118871	0.0947818	0.00407861	0	0.418463	0.0200363	0.160723	0	0.101652	0	0.04	0.114497	1.06583
TCGA.EW.A1OY	0.0577443	0.00684805	0.0365704	0.183379	0	0.0497077	0.0668641	0	0	0.135616	0.215644	0.161692	0.0082247	0.0536538	0.0120825	0.06	0.0584926	1.08474
TCGA.EW.A1OZ	0.0374623	0.00251727	0.0390673	0.0938507	0.0131085	0.085042	0.0454012	0.000493128	0	0.253808	0.0728893	0.238924	0.0195297	0.094122	0.00378473	0.06	0.142407	1.03434
TCGA.EW.A1P0	0.0686781	0.0117844	0.0431322	0.163591	0.0262396	0.136603	0.0357296	0	0	0.224032	0.0960083	0.128702	0.0293795	0.0240254	0	0.05	0.315813	0.956243
TCGA.EW.A1P1	0.0451475	0.0024593	0.140157	0.126775	0.0227558	0.0527906	0.0340257	0.000378754	0	0.235959	0.122307	0.0910342	0.0687909	0.0482434	0	0.02	0.201021	1.00856
TCGA.EW.A1P3	0.102899	0.011586	0.0660433	0.171837	0	0.0966314	0.0189871	0.00446484	0	0.027849	0.158413	0.155751	0.0166651	0.137245	0.0100204	0.04	0.143558	1.02956
TCGA.EW.A1P4	0.0929276	0.0104045	0.132416	0.150128	0.0872056	0.0510772	0.020629	0.0927036	0.0136509	0.0567874	0.0485837	0.0630072	0.0825764	0.0675978	0.018635	0.07	0.172262	1.01431
TCGA.EW.A1P5	0.0106895	0	0	0.0163805	0.0214818	0.044566	0.0864724	0	0	0.319918	0.0858333	0.258582	0.00122294	0.0603611	0.00956543	0	0.446928	0.89497
TCGA.EW.A1P6	0.172396	0.154707	0.118262	0.0586501	0.00139103	0.0527146	0.0115809	0.00262736	0.0102797	0.0301945	0.0603607	0.197473	0.00725139	0.120209	0.0019026	0.06	0.4058	0.914592
TCGA.EW.A1P7	0.0851011	0.0477684	0.135651	0.169797	0.00390015	0.105111	0.0718148	0.0220922	0.00781942	0.0985919	0.046669	0.0453063	0.00394634	0.0230344	0	0.06	0.317455	0.96111
TCGA.EW.A1P8	0.0192351	0.000482495	0.0730891	0.131529	0.0192711	0.065397	0.0659327	0	0.0147445	0.125504	0.0588676	0.214058	0.0996286	0	0.00681908	0.06	0.0716766	1.05644
TCGA.EW.A1PA	0.064	0	0.0687471	0.207807	0.00878325	0.0944043	0.00616439	0.00693962	0	0.111484	0.120549	0.0791658	0.0154921	0.216463	0	0.06	0.0672097	1.06005
TCGA.EW.A1PB	0.0121048	0.00147461	0.144138	0.0386956	0.016789	0.0598873	0.0391559	0.0223187	0	0.0461674	0.318526	0.203077	0.00707974	0.0647127	0	0.01	0.413391	0.926501
TCGA.EW.A1PC	0.0296203	0	0.0737695	0.0632223	0	0.130076	0.0669145	0.0265068	0	0.014242	0.0427221	0.209577	0.0449591	0.036594	0.0367225	0.02	-0.013301	1.09615
TCGA.EW.A1PD	0.0712072	0.0089065	0.0357251	0.127948	0.00335341	0.0307584	0.0433135	0	0	0.416939	0.086	0.137038	0	0.0388113	0	0.02	0.429182	0.906306
TCGA.EW.A1PE	0.116737	0.0963271	0.06634	0.178843	0.00308453	0.0746931	0.0254439	0.00956591	0	0.116459	0.0946107	0.153727	0.00328487	0.0474083	0.0134758	0.33	0.282253	0.969607
TCGA.EW.A1PF	0.0868941	0.0378718	0.0522752	0.188542	0.0139444	0.0366263	0.0458438	0	0	0.227081	0.12633	0.127687	0.00973207	0.043445	0	0.01	0.168828	1.02167
TCGA.EW.A1PG	0.0807391	0.035917	0.0600943	0.207122	0.0113823	0.0156365	0	0	0.0499963	0.0967642	0.0601647	0.105869	0.0420519	0.0756327	0	0.07	0.166449	1.00927
TCGA.EW.A1PH	0.0772742	0.00838624	0.174364	0.14861	0.0515872	0.0812894	0.00442269	0	0	0.133057	0.116162	0.0752757	0.050849	0.00552693	0.00311371	0.02	0.107943	1.04959
TCGA.EW.A2FR	0.0301614	0.00954749	0.072483	0.152875	0.00799405	0.0435317	0.0373347	0.00546722	0	0.366596	0.0534516	0.166653	0.0083539	0.0360574	0.00272179	0.08	0.0735569	1.07962
TCGA.EW.A2FS	0.0265957	0.080961	0.143152	0.123157	0	0.0508008	0.0233921	0.0470855	0.0167027	0.0912147	0.110763	0.100385	0.0385511	0.0939526	0	0.02	0.227775	0.990601
TCGA.EW.A2FV	0.0642772	0.0126523	0.0646534	0.350732	0.000797151	0.0697293	0.00324511	0.0170446	0.00409946	0.045949	0.120777	0.148929	0.0207937	0.051766	0	0.07	0.0924936	1.05903
TCGA.EW.A2FW	0.0821368	0.0789175	0.0475664	0.0937093	0	0.0529665	0.0456634	0.00774683	0	0.240919	0.10495	0.137129	0.00652078	0.101775	0	0.01	0.347679	0.94047
TCGA.EW.A3E8	0.100451	0.0621824	0.102293	0.187862	0	0.05561	0.0889009	0.0467237	0.0158647	0.0591012	0.0931659	0.0616627	0.0106035	0.115579	0	0	0.222601	0.997247
TCGA.EW.A3U0	0.049451	0.0177204	0.17756	0.0681271	0.0786801	0.0833159	0.0786744	0.0376843	0.0136174	0.113892	0.0942896	0.0988312	0.0477243	0.0383318	0.000366123	0.01	0.0950107	1.04883
TCGA.EW.A423	0.0327366	0.000556703	0.163027	0.218291	0.000577742	0.0341739	0.077332	0	0.0123796	0.0747954	0.0641612	0.256179	0	0.0282326	0	0.06	0.164929	1.02667
TCGA.EW.A424	0.22855	0.22453	0.0713947	0.0364385	0	0.0590874	0.00105327	0.0102377	0.0700022	0.0142876	0.0410907	0.0744653	0.016416	0.152447	0	0.01	0.471914	0.884058
TCGA.EW.A6S9	0.109763	0.109989	0.0366412	0.0590754	0	0.0403642	0.0532779	0.0276443	0.00272063	0.342349	0.0646036	0.0581562	0.00794308	0.0745148	0	0.01	0.264014	0.984421
TCGA.EW.A6SA	0.0588453	0.0215844	0.0523053	0.0279379	0	0.0874618	0.0532365	0.0340587	0	0.310357	0.0316657	0.117924	0	0.204624	0	0.92	0.122657	1.04217
TCGA.EW.A6SB	0	0.0466786	0.0862581	0.128343	0	0.115724	0.0933638	0.13354	0.0105542	0.0881153	0.0776258	0.0278289	0.0200811	0.0589676	0.0113977	0.05	0.199326	1.01524
TCGA.EW.A6SC	0.0682625	0.0215134	0.0236644	0.104432	0	0.0644963	0.0247282	0.0181298	0.00379845	0.0773237	0.0605394	0.133599	0.143781	0	0.00242813	0.01	0.211106	1.00108
TCGA.EW.A6SD	0.0206727	0.0015187	0.115697	0.117973	0.0546665	0.0641679	0.049727	0.00329768	0	0.142482	0.147776	0.143139	0.0427695	0.0644706	0.00984906	0	0.0341537	1.07615
TCGA.GM.A2D9	0.0459911	0.0083365	0.0673054	0.182355	0	0.0670466	0.0644849	0.00265838	0	0.197469	0.12586	0.186449	0.00694469	0.0359752	0.00912487	0.02	0.130265	1.0413
TCGA.GM.A2DA	0.161039	0.0889551	0.173089	0.229593	0.0012449	0.0912728	0.032432	0.0241181	0.00645258	0.0126769	0.0862009	0.0311506	0.00897491	0.0528003	0	0.02	0.293191	0.978843
TCGA.GM.A2DB	0.0773913	0.0363759	0.108232	0.0769953	0	0.0597407	0.0984156	0	0	0.274316	0.129208	0.0634669	0	0.0222322	0	0.05	0.206794	1.01104
TCGA.GM.A2DC	0.050264	0.0104468	0.209376	0.105376	0	0.0850622	0.0583591	0.0296076	0.0143269	0	0.149169	0.159666	0.0101365	0.117234	0.000976245	0.01	0.0947251	1.05899
TCGA.GM.A2DD	0.0404916	0.000703025	0.166716	0.187317	0.039426	0.0774942	0.0446263	0.0333824	0.0052749	0.0592103	0.118234	0.134907	0.0197184	0.0458311	0	0.02	0.134737	1.0425
TCGA.GM.A2DF	0.105495	0.0897523	0.0660121	0.0516017	0	0.108564	0.0553692	0.0396641	0	0.209515	0.0983437	0.141596	0	0.00631985	0.0198455	0.05	0.238571	0.992207
TCGA.GM.A2DH	0.0823055	0	0.101316	0.168433	0.0672809	0.0982206	0.0729122	0	0	0.107938	0.0849281	0.0793057	0.0335917	0.0398343	0	0.02	0.215431	1.00051
TCGA.GM.A2DI	0.0932513	0	0.248492	0.210253	0.110971	0	0.0159081	0	0.00683734	0.0801757	0.0751675	0.0997174	0.0177209	0.0281601	0	0.01	0.152822	1.03255
TCGA.GM.A2DK	0.0719722	0.00510308	0.0667925	0.131653	0	0.0545699	0.0629282	0.0385042	0	0.292629	0.0489799	0.201179	0.00287157	0.022818	0	0.07	0.133883	1.04323
TCGA.GM.A2DL	0.0194335	0.000351482	0.0247665	0.108847	0	0.0580564	0.0404964	0.0265423	0	0.119489	0.0540396	0.363133	0.0537439	0.0904793	0.00472516	0	0.228095	0.993666
TCGA.GM.A2DM	0.0280075	0.00666779	0.0553648	0.0585468	0	0.0640816	0.0263308	0.0296299	0.0802901	0.205875	0.053834	0.240882	0.0686814	0	0.00130971	0.01	0.244322	0.988858
TCGA.GM.A2DN	0.0468395	0.0101078	0.193053	0.120224	0.0221952	0.0618892	0.0696682	0	0	0.163221	0.117959	0.0718189	0.0700896	0.0316978	0	0.1	0.0727793	1.06526
TCGA.GM.A2DO	0.218666	0.0733858	0.155158	0.12699	0.0431921	0.051674	0.0711915	0.0166792	0	0.085994	0.0765428	0.0418213	0	0.0387048	0	0	0.373775	0.932564
TCGA.GM.A3NW	0.086211	0.00563623	0.0595187	0.200916	0	0.0445848	0.0993479	0	0.0178752	0.0325835	0.136995	0.0392155	0.0558946	0.221222	0	0.02	0.156551	1.02589
TCGA.GM.A3NY	0.17864	0.187439	0.104675	0.113817	0.00135422	0.114101	0.0302833	0.0132652	0.0140163	0	0.128296	0.0681564	0.0116151	0.0272764	0.00303418	0	0.400604	0.925644
TCGA.GM.A3XG	0.163182	0.0345885	0.0815175	0.00588728	0	0.129702	0.0366458	0	0	0.331185	0.0406671	0.147944	0	0.0286807	0	0.06	0.29442	0.971448
TCGA.GM.A3XL	0.0696334	0.0330216	0.189712	0.0324569	0.0788289	0.132888	0.0238372	0.0541538	0	0.0673106	0.0903754	0.147859	0.0571547	0.00664723	0.00371745	0.04	0.145112	1.0291
TCGA.GM.A3XN	0.149538	0.10922	0.0714847	0.152421	0	0.0481726	0.047677	0.026585	0	0.135932	0.124392	0.0724434	0.0271935	0.0349399	0	0	0.332082	0.950533
TCGA.GM.A4E0	0.0803817	0.0059656	0.223876	0.198506	0	0.0577692	0.0114416	0.0293263	0.0127015	0	0.13143	0.162538	0.0285578	0.0560219	0.00148446	0	0.146905	1.03853
TCGA.GM.A5PV	0.0334499	0.00581118	0.140263	0.207217	0	0.126809	0.0394957	0.0292684	0.00311571	0.0710244	0.105275	0.130181	0.0469168	0.0416423	0.0102926	0.01	0.10325	1.05519
TCGA.GM.A5PX	0.188001	0.0342235	0.0891482	0.18124	0	0.0845209	0.0116688	0.0345683	0	0.0764507	0.0591142	0.112429	0.0095843	0.119052	0	0.04	0.287461	0.966723
TCGA.HN.A2NL	0.0297799	0.0042496	0.156793	0.11785	0.0161069	0.109886	0.0871777	0.0257147	0	0.194738	0.0900868	0.131871	0.000649049	0.0318084	0	0.07	0.0505961	1.07939
TCGA.HN.A2OB	0.095873	0.0260717	0.100727	0.151127	0	0.034725	0.00942268	0.00904805	0.00169077	0.0482021	0.0683173	0.151586	0.0440029	0.259206	0	0	0.169562	1.01195
TCGA.JL.A3YW	0.0277259	0	0.0308654	0.140182	0	0.0579775	0.0749495	0	0	0.375704	0.105828	0.144638	0.00550627	0	0	0.05	0.0406519	1.10251
TCGA.JL.A3YX	0.0587668	0.0490003	0.188536	0.112057	0.00426073	0.0172179	0.0470693	0	0.02028	0.0784435	0.0175699	0.0896778	0.00521775	0.311903	0	0.03	0.181468	1.01498
TCGA.LD.A66U	0.0903518	0.0873545	0.158526	0.165378	0	0.1139	0.106088	0.0399794	0.0028515	0.0152883	0.0852408	0.0522071	0.0144524	0.062611	0.00512615	0.05	0.251927	0.995561
TCGA.LD.A74U	0.086003	0.0193986	0.0553531	0.0430029	0	0.033094	0.0207926	0.0106931	0	0.400116	0.0448442	0.149647	0	0.137056	0	0.02	0.29365	0.975565
TCGA.LD.A7W5	0.171355	0.0388007	0.160842	0.0917882	0.027103	0.12122	0.128422	0.0155734	0.0112432	0.0499257	0.0737766	0.0397669	0.0296265	0.0405573	0	0.08	0.268609	0.984596
TCGA.LD.A7W6	0.128154	0.0834952	0.146349	0.177102	0.00463357	0.0696747	0.0515859	0.0105838	0.00682587	0	0.0718031	0.119133	0.00790862	0.1156	0	0.02	0.277774	0.974002
TCGA.LD.A9QF	0.0368792	0	0.108594	0.0665976	0.0111241	0.10224	0.0866507	0.0237562	0	0.363862	0.086188	0.0747114	0.00505678	0.0232666	0	0.01	0.128614	1.0539
TCGA.LL.A440	0.0218808	0	0.0508662	0.0821117	0.0122323	0.0355314	0.0690992	0	0	0.385577	0.0268418	0.177317	0.0138932	0.0984886	0.000599642	0.01	0.207696	1.01806
TCGA.LL.A441	0.224892	0.0350317	0.0564824	0.146548	0.00530072	0.126018	0.0638413	0.0182249	0	0.140357	0.0539211	0.0171043	0	0.0365186	0	0.01	0.402146	0.919046
TCGA.LL.A442	0	0.00532145	0.0223261	0.0674681	0	0	0.00470118	0.0113323	0.11241	0	0	0.631395	0	0.110032	0.0074954	0.02	0.0707237	1.09034
TCGA.LL.A50Y	0.0461106	0	0.138363	0.0351269	0	0.0667329	0.128633	0.091478	0.0116859	0.0763984	0.0754527	0.12831	0.0441695	0.107022	0.00993999	0.01	0.110232	1.04042
TCGA.LL.A5YL	0.0980276	0.0314302	0.124221	0.108577	0.014971	0.0533619	0.0617641	0.0670521	0.0508131	0.028244	0.0476254	0.155345	0.0198629	0.100278	0.00757249	0.01	0.209709	0.994573
TCGA.LL.A5YM	0.00148814	0.0394302	0.0877271	0.0640208	0.000380687	0.0235505	0.0679967	0.00404879	0	0.328678	0.0492222	0.223855	0	0.0746548	0	0.05	0.146116	1.04068
TCGA.LL.A5YN	0.111056	0.0626825	0.102921	0.0887807	0.0189667	0.125053	0.177683	0.0185403	1.5094e-05	0.0912252	0.075157	0.0670276	0.00218592	0.0401489	0.00043546	0.03	0.266876	0.983513
TCGA.LL.A5YO	0.122062	0.0427501	0.159693	0.0591521	0.0632081	0.0790115	0.086582	0	0	0.161182	0.0894045	0.06285	0.0146549	0.0415541	0	0.05	0.226516	0.994638
TCGA.LL.A5YP	0.0392256	0.0207542	0.0482673	0.172673	0.0173605	0.0607534	0.0727585	0	0.0138142	0.121924	0.0749719	0.276636	0.0440582	0.00717385	0.00646695	0.01	0.0765824	1.05507
TCGA.LL.A6FP	0	0.0186536	0.0770636	0.0424376	0.00145975	0	0.0120413	0	0	0.213673	0	0.227037	0.0198118	0.33988	0.00115515	0.01	0.093796	1.06572
TCGA.LL.A6FQ	0.00141151	0.010432	0.0483089	0	0	0.0506626	0.0524624	0	0.0196232	0.395223	0.0588513	0.22601	0.0186228	0.0609387	0	0.07	0.678184	0.752337
TCGA.LL.A6FR	0	0	0.014753	0	0.00193795	0.0124437	0.0457596	0	0	0.726357	0	0.13653	0	0.00698789	0	0	0.319079	1.03256
TCGA.LL.A73Y	0.0699781	0	0.0517805	0.0696374	0.00175899	0.0917769	0.106984	0.0516732	0	0.324621	0.0202058	0.0517511	0.0941213	0.0370928	0	0.03	0.113351	1.04962
TCGA.LL.A73Z	0.0947564	0.0294608	0.10034	0.153644	0	0.0674313	0.0814917	0.0268225	0	0.0323596	0.179765	0.114829	0.0164793	0.0928637	0.000988281	0.04	0.202639	1.0124
TCGA.LL.A740	0.0364296	0.00518507	0.0423577	0.0487294	0.0157983	0.0524301	0.0799927	0	0.00726579	0.37538	0.032389	0.108688	0.106002	0.049261	0	0.02	0.159107	1.03643
TCGA.LL.A7SZ	0.0251528	0.126476	0.122335	0.118683	0.0464681	0.074771	0.0703268	0	0	0.0480644	0.0704323	0.173823	0.00795998	0.058654	0.0214483	0.01	0.258212	0.978653
TCGA.LL.A7T0	0.0396131	0.00568339	0.148198	0.0863802	0	0.111917	0.0759765	0.010961	0	0.281039	0.0785525	0.137165	0.0045162	0.0192335	0.000764376	0.06	0.0554745	1.08053
TCGA.LL.A8F5	0.0290034	0.111173	0.0758901	0.0365781	0.0354572	0.0804087	0.0833584	0.00184008	0	0.269758	0.0866812	0.122981	0.00512359	0.0447205	0	0.05	0.192242	1.01178
TCGA.LL.A9Q3	0.0220657	0.00592724	0.143964	0.0423288	0	0.0570645	0.0993956	0.0657238	0.0040253	0.0735579	0.106364	0.132884	0.0385742	0.203739	0.00438546	0	0.0877559	1.05012
TCGA.LQ.A4E4	0.0204507	0.0125488	0.07152	0.102965	0	0.0241094	0.0456044	0.024766	0.0343859	0.00472915	0.0508554	0.322695	0.00137387	0.283996	0	0.58	0.096795	1.04611
TCGA.MS.A51U	0.132888	0.0768765	0.130061	0.17119	0.0111679	0.0651273	0.0731027	0	0.00241202	0.0477871	0.132179	0.0602158	0.0533805	0.0342552	0	0.02	0.267411	0.982308
TCGA.OK.A5Q2	0.185872	0.0603403	0.112689	0.114998	0.013367	0.0620479	0.121767	0.024789	0.00120604	0.0557082	0.0528983	0.0483205	0.087978	0.0497268	0.00829239	0.01	0.353652	0.938842
TCGA.OL.A5D6	0.0257785	0.00218602	0.0973318	0.216914	0	0.060678	0.0639558	0	0.02965	0.0599235	0.123352	0.165664	0.038458	0.113743	0	0.03	0.038835	1.07086
TCGA.OL.A5D7	0.0348465	0.0488393	0.162428	0.0535933	0.103469	0.10812	0.148428	0	0.00218475	0.0531024	0.145168	0.0585065	0.00507099	0.016967	0.00250847	0.03	0.162026	1.03784
TCGA.OL.A5D8	0.0690019	0.0118092	0.081951	0.116443	0	0.125307	0.107619	0	0.0137436	0.15583	0.142209	0.0934818	0.0325181	0.033994	0	0.01	0.117514	1.04711
TCGA.OL.A5DA	0.0678344	0.0250965	0.133974	0.156293	0	0.152192	0.043202	0.0129775	0	0.0619676	0.125201	0.0848669	0.0143373	0.0867416	0	0.01	0.169189	1.02674
TCGA.OL.A5RU	0.129269	0.0846027	0.180034	0.145963	0.00478427	0.0559999	0.0994954	0.0248127	0.021174	0.0598562	0.0740316	0.0766595	0.00326858	0.040049	0	0.11	0.273819	0.979993
TCGA.OL.A5RV	0.186623	0.127685	0.0895374	0.0924911	0	0.0581202	0.0231999	0	0.00235618	0.0147069	0.0343647	0.0937098	0.0684658	0.171766	0.00771718	0	0.416905	0.908539
TCGA.OL.A5RW	0.00272661	0.0204038	0.0157781	0.127362	0	0.130299	0.0727188	0.00249312	0.0468481	0.162033	0.118653	0.127349	0	0.0296642	0.00818308	0.01	0.0860164	1.0582
TCGA.OL.A5RX	0.178663	0.101171	0.134851	0.14296	0	0.101688	0.05092	0.0169202	0.00527834	0.0166499	0.0437552	0.0591009	0.0688228	0.0713882	0.00783112	0.06	0.339184	0.947988
TCGA.OL.A5RY	0.185514	0.100122	0.0942363	0.135258	0.0176151	0.103077	0.031168	0.0198047	0.0022675	0.0238478	0.0678137	0.124228	0.0479829	0.047064	0	0.04	0.354254	0.939184
TCGA.OL.A5RZ	0.0522701	0.0484494	0.087503	0.0945703	0.0329287	0.0466606	0.0264231	0	0.00758363	0.29913	0.036001	0.21539	0	0.0433949	0.00489208	0.05	0.121784	1.04545
TCGA.OL.A5S0	0.0664586	0.0018787	0.0683065	0	0	0.122965	0.0623378	0	0	0.378375	0.1402	0.115779	0.0242521	0	0	0	0.216988	1.01967
TCGA.OL.A66H	0.0135562	0	0.0746727	0.1561	0.0268275	0.0583728	0.0210099	0	0.0879262	0.03969	0.0708491	0.357145	0	0.0786108	0.00936926	0.01	0.0294006	1.07035
TCGA.OL.A66I	0.0170199	0.00675712	0.295599	0.0723603	0.0641418	0.0407738	0.154008	0	0	0.0783641	0.0980062	0.0419371	0.0977012	0.0309182	0.00241322	0.01	0.20598	1.01573
TCGA.OL.A66J	0.0496285	0.00458627	0.111254	0.0574777	0.0110316	0.0660737	0.0163256	0	0	0.306353	0.0515981	0.187397	0.0544356	0.0612162	0.00717974	0.06	0.170612	1.02499
TCGA.OL.A66K	0.155752	0.0611066	0.096965	0.0382478	0	0.0922445	0.0179822	0.0135458	0.0140715	0.121194	0.0345483	0.163418	0.000990696	0.150815	0.0177619	0.1	0.295774	0.960116
TCGA.OL.A66L	0.0983715	0.00314698	0.185637	0.087881	0	0.0685114	0.0419814	0.082452	0.0116848	0.0368781	0.0818237	0.156532	0.0128266	0.0863933	0.00784169	0.02	0.159869	1.02579
TCGA.OL.A66N	0.0825519	0.0461588	0.137639	0.0698313	0	0.131655	0.0391201	0.0733491	0.00550548	0.00186372	0.016039	0.15872	0.0512276	0.176424	0	0.01	0.17812	1.01093
TCGA.OL.A66O	0.0668533	0.143057	0.113117	0.0809746	0	0.0647127	0.0961419	0.0798832	0.00541122	0.0373272	0.0367111	0.146608	0.0132119	0.10771	0.00737634	0.02	0.301916	0.961917
TCGA.OL.A66P	0	0.0653406	0.239719	0.0214317	0.0391229	0.0962522	0.0448601	0.0482177	0.0184352	0.0907104	0.0760193	0.0826823	0.0211665	0.0897043	0	0.01	0.18626	1.01066
TCGA.OL.A6VO	0.00557944	0.000478271	0.0365826	0.0780032	0	0.0757454	0.0630788	0.00860797	0	0.588758	0.0715748	0.0692317	0	0.00236015	0	0.05	0.105614	1.11516
TCGA.OL.A6VQ	0.16498	0.0128879	0.105535	0.221669	0.00790568	0.0133348	0	0.00838598	0.00268886	0	0.0933117	0.0749743	0.103743	0.149657	0.00184004	0.06	0.234148	0.987396
TCGA.OL.A6VR	0.162147	0.0678505	0.00262625	0.156716	0	0.0641024	0.0311962	0	0	0.208394	0.0353197	0.222491	0.00169248	0.0474659	0	0	0.244647	0.988706
TCGA.OL.A97C	0.0743148	0.0103692	0.168891	0.059528	0.0843482	0.0939126	0.033114	0	0	0.189703	0.0689305	0.187895	0	0	0.00193497	0	0.354902	0.937445
TCGA.PE.A5DC	0.0857292	0.0107592	0.0797737	0.216042	0	0.0383399	0.0673315	0.0123433	0	0.197146	0.105562	0.0964494	0	0.0771351	0	0.05	0.293131	0.96578
TCGA.PE.A5DD	0.102656	0.0175024	0.160293	0.237295	0	0.0515169	0.0633961	0	0.0144495	0.0732857	0.110408	0.0225784	0.00977985	0.119153	0	0.01	0.151586	1.03515
TCGA.PE.A5DE	0.129872	0.0664936	0.270135	0.113943	0.018032	0.098109	0.064028	0.0309613	0.0159287	0.0400977	0.0973832	0.034499	0.019509	0.00100746	0	0	0.247811	1.00312
TCGA.PL.A8LX	0	0.00196558	0.0434024	0.124514	0.00775512	0	0.0465178	0.0229498	0	0.145062	0.0179306	0.381506	0.00783707	0.180457	0	0.05	0.108011	1.04855
TCGA.PL.A8LY	0.113858	0.126284	0.175406	0.0662345	0	0.0936886	0.0888693	0.0158418	0.00695819	0.0585642	0.0126314	0.181439	0.0101301	0.00711285	0	0.04	0.316866	0.959186
TCGA.PL.A8LZ	0.0389877	0.0291641	0.0400329	0.138703	0.0932147	0.0679488	0.0817455	0	0	0.0916197	0.232617	0.103851	0	0.0336019	0	0.01	0.13081	1.05589
TCGA.S3.A6ZF	0.131482	0.0122529	0.114072	0.183218	0.0403351	0.0573172	0.0189881	0	0	0.0676804	0.0990503	0.139851	0.0526565	0.0665061	0	0.05	0.202987	1.00003
TCGA.S3.A6ZG	0.143018	0.102914	0.0703003	0.143918	0	0.0296322	0.0334896	0.0235744	0.0175051	0.0967509	0.0585691	0.150914	0.0145745	0.107117	0	0.04	0.332424	0.945824
TCGA.S3.A6ZH	0.0880915	0.106063	0.109242	0.0666102	0.000673384	0.0743423	0.0514077	0.0391348	0.0106169	0.0248014	0.123499	0.105191	0.0640765	0.134192	0.00205782	0.01	0.300574	0.960159
TCGA.S3.AA0Z	0.0632281	0.00655459	0.0879131	0.042045	0	0.157518	0.0692059	0.0135929	0.00293206	0.220683	0.119767	0.151183	0.0160515	0.0329177	0	0.01	0.090048	1.05797
TCGA.S3.AA10	0.0109516	0.0168647	0.0918532	0.0905594	0.0570749	0.11885	0.0929431	0.074511	0	0.15583	0.160032	0.0640375	0	0.0382746	0	0	0.0778619	1.07295
TCGA.S3.AA11	0.0517646	0.0247298	0.00795083	0.0942073	0	0.048373	0.0223475	0.0122246	0	0.384092	0.039976	0.135601	0	0.178733	0	0	0.152377	1.04103
TCGA.S3.AA12	0.0143132	0.0156108	0.127661	0.185135	0	0.0795218	0.0465412	0.00308068	0.0447946	0.0931007	0.0307157	0.208556	0	0.13017	0.00397863	0	0.0472283	1.06347
TCGA.S3.AA14	0.121462	0.0795961	0.0720048	0.21703	0.00495004	0.0639671	0.00570754	0	0.0196092	0	0.0855029	0.141537	0.0266691	0.133901	0	0.09	0.277048	0.969422
TCGA.S3.AA15	0.107616	0.235078	0.135248	0.0797832	0.0352837	0.0333041	0.0493625	0.00051996	0.0182224	0.0657076	0.0361692	0.101555	0.00454036	0.0531641	0.00180863	0.01	0.440808	0.899829
TCGA.S3.AA17	0.0547266	0.0115768	0.146101	0.137342	0.0737817	0.0403034	0.0754566	0	0	0.165891	0.103963	0.100058	0	0.0222246	0	0.04	0.0882395	1.05755
TCGA.UL.AAZ6	0.0188932	0.00272196	0.0257363	0.152306	0	0.00742094	0.0581612	0.0123048	0	0.318607	0.054725	0.289995	0	0.0591294	0	0.04	0.0320298	1.10041
TCGA.UU.A93S	0.0257697	0.00112714	0.0646754	0.0145707	0.0108526	0.141938	0.010112	0.030795	0	0.318171	0.0739588	0.149647	0	0.0612263	0	0.05	-0.00347349	1.10376
TCGA.V7.A7HQ	0.0624626	0.0508771	0.114637	0.0337101	0.020976	0.0281114	0.0535005	0	0.00339447	0.105664	0.0561873	0.278361	0.0309427	0.153968	0.00720696	0.02	0.16998	1.00957
TCGA.W8.A86G	0.16714	0.103567	0.0741804	0.0359926	0	0.0653835	0.0417719	0.0600363	0.055128	0	0.0364339	0.15024	0.0149965	0.19513	0	0.04	0.355921	0.936267
TCGA.WT.AB41	0.100742	0.0687989	0.144908	0	0.00932195	0.132934	0.199058	0.00770216	0	0.0672804	0.0903269	0.105579	0.00685636	0.0431783	0.00228034	0	0.22985	0.999802
TCGA.WT.AB44	0.0961542	0.0185817	0.106916	0.0732961	0.0111531	0.127583	0.0465152	0.00373101	0.00667018	0.150039	0.0555377	0.161046	0.0226361	0.0598614	0	0.06	0.157977	1.01768
TCGA.XX.A899	0.192379	0.0285252	0.0994298	0.198399	0.0427858	0	0.00767395	0	0.0115251	0.0901552	0.0611786	0.116996	0.00122761	0.148468	0	0.02	0.353526	0.936313
TCGA.XX.A89A	0.17117	0.0714359	0.0736532	0.254374	0	0.00949937	0.0582035	0.0185622	0.0122585	0.0636659	0.0720802	0.133316	0.00130619	0.0578997	0.00257495	0.06	0.313596	0.957077
TCGA.Z7.A8R5	0.128518	0.0439915	0.13392	0.0181506	0	0.117873	0.0506544	0.0760079	0.0457511	0.0896595	0.0143239	0.161683	0.0219292	0.0937656	0.00377246	0.02	0.265087	0.973793
TCGA.Z7.A8R6	0.0596795	0.0120618	0.0954434	0.131524	0.00596194	0.0438998	0.058152	0.0105847	0.00823045	0.23968	0.145904	0.0555436	0.0528279	0.0802125	0	0.01	0.199933	1.00877
TCGA.S3.A6ZH	0.021897	0.187362	0.128204	0.167381	0.0238513	0.00199804	0.0631222	0.035149	0.0962367	0.0796018	0.0152594	0.03	0.41474	0.909027
TCGA.S3.AA0Z	0.103564	0.163836	0.0574897	0.205949	0.109702	0.0164388	0.00656371	0.130496	0.124166	0.0459614	0.0186904	0.03	0.411098	0.915231
TCGA.S3.AA10	0.0976809	0.240298	0.0853016	0.157456	0.0506804	0.0167854	0.0175122	0.0620307	0.196247	0.0165734	0.00910265	0.02	0.47951	0.885225
TCGA.S3.AA11	0	0.178743	0.0134827	0.166487	0.00349409	0.0497942	0	0.299703	0.0236932	0.208288	0	0.04	0.371693	0.941458
TCGA.S3.AA12	0.0217174	0.266869	0.101915	0.170029	0.0285013	0.0279542	0.0253333	0.0456927	0.0581585	0.173697	0.0192303	0.01	0.52483	0.849573
TCGA.S3.AA14	0.0414456	0.26265	0.078629	0.190215	0.128136	0.0141154	0.0105412	0	0.0617164	0.146301	0.0116181	0.01	0.517716	0.854971
TCGA.S3.AA15	0.0666408	0.512854	0.0648598	0.132189	0.0312017	0	0.00703675	0.010822	0.0153979	0.0896509	0	0	0.611919	0.819981
TCGA.S3.AA17	0.137953	0.284944	0.066972	0.167918	0.0133081	0.0281976	0.00946343	0.0983377	0.121166	0.0557234	0	0	0.590717	0.80582
TCGA.UL.AAZ6	0	0.0815439	0.0227929	0.0982561	0	0	0	0.244404	0.0703745	0.345083	0	0.07	0.204165	1.02458
TCGA.UU.A93S	0.00813783	0.191614	0.0574661	0.201999	0	0.108057	0	0.310184	0.0621891	0.00677328	0	0.07	0.222854	1.01956
TCGA.V7.A7HQ	0	0.289353	0.0177227	0.11994	0	0.0385212	0.00576086	0.0116992	0.0254089	0.302445	0	0	0.57796	0.814575
TCGA.W8.A86G	0	0.31883	0.101622	0.209488	0	0.0758178	0.0257457	0	0.0138934	0.168794	0	0.01	0.549626	0.83424
TCGA.WT.AB41	0.0723424	0.21134	0.114572	0.193592	0.0680507	0	0	0.162905	0.0258151	0.0813802	0	0.02	0.471706	0.881501
TCGA.WT.AB44	0.00328175	0.248347	0.150653	0.156289	0	0.0483643	0.00661477	0.232271	0.0541831	0.0226863	0.00706472	0.02	0.440054	0.901041
TCGA.XX.A899	0.112401	0.0865854	0.0951129	0.277279	0	0.0100493	0.0419937	0.0495366	0.0790678	0.190415	0.0252943	0.03	0.40606	0.912557
TCGA.XX.A89A	0	0.515185	0.0451158	0.185187	0	0	0.0110367	0.0382384	0.0693249	0.101385	0.0197037	0	0.592881	0.82647
TCGA.Z7.A8R5	0.0315672	0.160196	0.200972	0.135102	0	0	0.0298874	0.0781038	0.00522649	0.184823	0.000828336	0.01	0.499027	0.864907
TCGA.Z7.A8R6	0.0144551	0.0556842	0.0897272	0.241608	0	0.122769	0.0373873	0.159733	0.124636	0.0662206	0.0403255	0.07	0.211888	1.00415

## Sheet: s6
SupplementaryTable 6: GSEA results of high-risk/low-risk groups
GSEA results of low-risk groups									GSEA results of high-risk groups
NAME	SIZE	ES	NES	NOM p-val	FDR q-val	FWER p-val	RANK AT MAX	LEADING EDGE	NAME	SIZE	ES	NES	NOM p-val	FDR q-val	FWER p-val	RANK AT MAX	LEADING EDGE
GSE7218_IGM_VS_IGG_SIGNAL_THGOUGH_ANTIGEN_BCELL_DN	169	0.756452	2.46477	0	0	0	4149	tags=56%, list=10%, signal=62%	GSE45365_CTRL_VS_MCMV_INFECTION_NK_CELL_DN	194	-0.5337	-1.98677	0.00208333	0.698652	0.099	5378	tags=42%, list=13%, signal=48%
GSE3039_NKT_CELL_VS_ALPHAALPHA_CD8_TCELL_DN	200	0.734376	2.46175	0	0	0	2266	tags=47%, list=6%, signal=50%	GSE10239_MEMORY_VS_KLRG1HIGH_EFF_CD8_TCELL_DN	199	-0.617742	-1.94935	0.00212766	0.422488	0.125	9121	tags=65%, list=23%, signal=83%
GSE7218_UNSTIM_VS_ANTIGEN_STIM_THROUGH_IGG_BCELL_DN	169	0.804273	2.4465	0	0	0	2778	tags=56%, list=7%, signal=60%	GSE18804_SPLEEN_MACROPHAGE_VS_BRAIN_TUMORAL_MACROPHAGE_DN	197	-0.5422	-1.93873	0.00224719	0.367275	0.131	5193	tags=39%, list=13%, signal=45%
GSE2405_0H_VS_12H_A_PHAGOCYTOPHILUM_STIM_NEUTROPHIL_UP	199	0.697478	2.42931	0	0	0	4052	tags=53%, list=10%, signal=59%	GSE45365_CD8A_DC_VS_CD11B_DC_DN	198	-0.529007	-1.95598	0.00431965	0.572207	0.119	6572	tags=42%, list=16%, signal=50%
GSE24634_IL4_VS_CTRL_TREATED_NAIVE_CD4_TCELL_DAY3_DN	199	0.698512	2.38511	0	0	0	2907	tags=43%, list=7%, signal=46%	GSE13485_CTRL_VS_DAY1_YF17D_VACCINE_PBMC_UP	196	-0.599933	-1.87941	0.0063425	0.542108	0.184	10120	tags=66%, list=25%, signal=88%
GSE2405_S_AUREUS_VS_A_PHAGOCYTOPHILUM_NEUTROPHIL_UP	200	0.615968	2.35166	0	0.000116403	0.001	5060	tags=46%, list=13%, signal=52%	GSE2770_UNTREATED_VS_IL12_TREATED_ACT_CD4_TCELL_48H_DN	200	-0.506269	-1.771	0.00829876	0.521096	0.291	8051	tags=49%, list=20%, signal=61%
GSE7509_UNSTIM_VS_FCGRIIB_STIM_DC_DN	174	0.737858	2.33499	0	9.97743e-05	0.001	2728	tags=49%, list=7%, signal=53%	GSE45365_CD8A_DC_VS_CD11B_DC_IFNAR_KO_DN	196	-0.49977	-1.89434	0.0083682	0.542498	0.173	3675	tags=32%, list=9%, signal=35%
GSE10325_BCELL_VS_MYELOID_DN	199	0.692499	2.3174	0	8.73026e-05	0.001	4141	tags=51%, list=10%, signal=57%	GSE2770_TGFB_AND_IL4_VS_IL4_TREATED_ACT_CD4_TCELL_6H_DN	198	-0.542567	-1.87045	0.00842105	0.518592	0.194	6630	tags=49%, list=16%, signal=59%
GSE42088_2H_VS_24H_LEISHMANIA_INF_DC_UP	200	0.645096	2.31524	0	7.76023e-05	0.001	4337	tags=49%, list=11%, signal=54%	GSE44649_NAIVE_VS_ACTIVATED_CD8_TCELL_DN	200	-0.54121	-1.82827	0.0104822	0.535204	0.228	10323	tags=60%, list=26%, signal=80%
GSE41087_WT_VS_FOXP3_MUT_ANTI_CD3_CD28_STIM_CD4_TCELL_UP	194	0.63596	2.2909	0	0.000129655	0.002	3849	tags=45%, list=10%, signal=50%	GSE14000_TRANSLATED_RNA_VS_MRNA_DC_UP	200	-0.546793	-1.83255	0.0125786	0.624497	0.225	7369	tags=47%, list=18%, signal=57%
GSE19198_1H_VS_24H_IL21_TREATED_TCELL_DN	200	0.613569	2.28858	0	0.000117868	0.002	3928	tags=43%, list=10%, signal=47%	GSE18804_SPLEEN_MACROPHAGE_VS_TUMORAL_MACROPHAGE_DN	198	-0.468832	-1.79653	0.0129032	0.584961	0.261	6026	tags=39%, list=15%, signal=46%
GSE10325_LUPUS_CD4_TCELL_VS_LUPUS_MYELOID_DN	200	0.697072	2.27285	0	0.000215446	0.003	4141	tags=52%, list=10%, signal=58%	GSE1460_NAIVE_CD4_TCELL_CORD_BLOOD_VS_THYMIC_STROMAL_CELL_DN	198	-0.502559	-1.79056	0.0143149	0.541161	0.27	7492	tags=42%, list=19%, signal=51%
GSE43863_DAY6_EFF_VS_DAY150_MEM_LY6C_INT_CXCR5POS_CD4_TCELL_DN	200	0.676206	2.27056	0	0.000198873	0.003	3677	tags=46%, list=9%, signal=50%	GSE18804_BRAIN_VS_COLON_TUMORAL_MACROPHAGE_DN	194	-0.488633	-1.84477	0.0143737	0.612718	0.216	2223	tags=29%, list=6%, signal=31%
GSE40274_CTRL_VS_FOXP3_AND_LEF1_TRANSDUCED_ACTIVATED_CD4_TCELL_UP	165	0.592698	2.26901	0	0.000184668	0.003	4912	tags=42%, list=12%, signal=48%	GSE21360_PRIMARY_VS_SECONDARY_MEMORY_CD8_TCELL_UP	199	-0.408891	-1.66011	0.0176991	0.340584	0.428	4811	tags=32%, list=12%, signal=36%
GSE24634_TREG_VS_TCONV_POST_DAY5_IL4_CONVERSION_DN	198	0.646511	2.26898	0	0.000172357	0.003	4597	tags=49%, list=11%, signal=55%	GSE22886_NAIVE_CD4_TCELL_VS_12H_ACT_TH1_DN	199	-0.54299	-1.7957	0.0186335	0.550085	0.263	8692	tags=59%, list=22%, signal=75%
GSE21670_STAT3_KO_VS_WT_CD4_TCELL_UP	197	0.56831	2.25681	0	0.000289989	0.005	3276	tags=37%, list=8%, signal=40%	GSE22886_UNSTIM_VS_IL15_STIM_NKCELL_DN	200	-0.599359	-1.82896	0.0201613	0.584233	0.227	7900	tags=62%, list=20%, signal=77%
GSE19888_ADENOSINE_A3R_INH_PRETREAT_AND_ACT_BY_A3R_VS_TCELL_MEMBRANES_ACT_MAST_CELL_UP	200	0.749897	2.25369	0	0.000272931	0.005	3595	tags=58%, list=9%, signal=64%	GSE557_CIITA_KO_VS_I_AB_KO_DC_DN	200	-0.502851	-1.76214	0.0205761	0.470628	0.305	10867	tags=52%, list=27%, signal=72%
GSE29618_MONOCYTE_VS_PDC_UP	198	0.673714	2.25366	0	0.000257768	0.005	4163	tags=49%, list=10%, signal=54%	GSE16266_CTRL_VS_HEATSHOCK_AND_LPS_STIM_MEF_UP	199	-0.522915	-1.81899	0.0208333	0.500078	0.241	5163	tags=41%, list=13%, signal=46%
GSE23568_CTRL_TRANSDUCED_VS_WT_CD8_TCELL_DN	199	0.626672	2.25156	0	0.000244201	0.005	3194	tags=39%, list=8%, signal=42%	GSE25147_UNSTIM_VS_HELIOBACTER_PYLORI_LPS_STIM_MKN45_CELL_UP	170	-0.428797	-1.69281	0.0211864	0.337579	0.377	5668	tags=31%, list=14%, signal=36%
GSE42724_MEMORY_VS_B1_BCELL_DN	195	0.597293	2.24909	0	0.000231991	0.005	4292	tags=44%, list=11%, signal=49%	GSE3982_MEMORY_CD4_TCELL_VS_TH2_DN	198	-0.537266	-1.82233	0.0221774	0.522464	0.235	8825	tags=57%, list=22%, signal=73%
GSE7509_UNSTIM_VS_IFNA_STIM_IMMATURE_DC_DN	172	0.741019	2.24778	0	0.000249168	0.005	3403	tags=55%, list=8%, signal=60%	GSE37532_VISCERAL_ADIPOSE_TISSUE_VS_LN_DERIVED_PPARG_KO_TCONV_CD4_TCELL_UP	165	-0.533942	-1.74955	0.0228216	0.486081	0.315	8951	tags=56%, list=22%, signal=71%
GSE11057_PBMC_VS_MEM_CD4_TCELL_UP	197	0.648931	2.24365	0	0.000318748	0.006	4264	tags=48%, list=11%, signal=54%	GSE33292_DN3_THYMOCYTE_VS_TCELL_LYMPHOMA_FROM_TCF1_KO_UP	173	-0.509986	-1.76834	0.0229645	0.509116	0.297	7986	tags=49%, list=20%, signal=61%
GSE22886_DAY0_VS_DAY1_MONOCYTE_IN_CULTURE_UP	200	0.632934	2.24176	0	0.000330659	0.006	4529	tags=45%, list=11%, signal=50%	GSE5542_IFNG_VS_IFNA_TREATED_EPITHELIAL_CELLS_24H_UP	200	-0.508804	-1.73693	0.0233546	0.486544	0.334	9186	tags=52%, list=23%, signal=68%
GSE42021_TREG_PLN_VS_CD24INT_TREG_THYMUS_DN	199	0.738357	2.24144	0	0.000316881	0.006	3391	tags=55%, list=8%, signal=60%	GSE31082_DP_VS_CD4_SP_THYMOCYTE_UP	199	-0.50929	-1.7578	0.0257511	0.46935	0.308	8148	tags=49%, list=20%, signal=61%
GSE10325_CD4_TCELL_VS_MYELOID_DN	200	0.643854	2.24047	0	0.000329106	0.007	4049	tags=47%, list=10%, signal=51%	GSE2770_TGFB_AND_IL4_ACT_VS_ACT_CD4_TCELL_6H_DN	195	-0.503035	-1.73069	0.0257511	0.465673	0.342	6827	tags=45%, list=17%, signal=54%
GSE5679_RARA_AGONIST_AM580_VS_AM580_AND_ROSIGLITAZONE_TREATED_DC_DN	200	0.592977	2.23781	0	0.000316448	0.007	3100	tags=35%, list=8%, signal=38%	GSE20715_0H_VS_48H_OZONE_LUNG_DN	200	-0.455735	-1.69495	0.0261569	0.34319	0.374	8236	tags=43%, list=20%, signal=53%
GSE29164_UNTREATED_VS_CD8_TCELL_TREATED_MELANOMA_DAY7_UP	199	0.59535	2.23428	0	0.000348699	0.007	3776	tags=38%, list=9%, signal=41%	GSE22886_NAIVE_CD4_TCELL_VS_48H_ACT_TH1_DN	199	-0.553505	-1.76591	0.0268041	0.496875	0.301	8100	tags=52%, list=20%, signal=64%
GSE41978_ID2_KO_VS_BIM_KO_KLRG1_LOW_EFFECTOR_CD8_TCELL_UP	198	0.687847	2.22664	0	0.000422174	0.007	3332	tags=49%, list=8%, signal=54%	GSE6674_ANTI_IGM_VS_PL2_3_STIM_BCELL_DN	199	-0.531158	-1.78366	0.0271967	0.544975	0.273	5763	tags=49%, list=14%, signal=57%
GSE19888_ADENOSINE_A3R_ACT_VS_TCELL_MEMBRANES_ACT_IN_MAST_CELL_UP	200	0.642298	2.22575	0	0.000407617	0.007	5397	tags=52%, list=13%, signal=59%	GSE37532_WT_VS_PPARG_KO_VISCERAL_ADIPOSE_TISSUE_TCONV_DN	200	-0.505631	-1.72583	0.0274262	0.431439	0.349	9359	tags=51%, list=23%, signal=65%
GSE39110_UNTREATED_VS_IL2_TREATED_CD8_TCELL_DAY6_POST_IMMUNIZATION_UP	199	0.600861	2.21868	0	0.000560022	0.009	4501	tags=45%, list=11%, signal=50%	GSE10239_MEMORY_VS_DAY4.5_EFF_CD8_TCELL_DN	200	-0.588329	-1.78193	0.0276596	0.523109	0.276	9876	tags=67%, list=25%, signal=88%
GSE5589_LPS_VS_LPS_AND_IL10_STIM_IL10_KO_MACROPHAGE_45MIN_DN	199	0.594014	2.2183	0	0.000541957	0.009	3237	tags=37%, list=8%, signal=40%	GSE3982_MAST_CELL_VS_BASOPHIL_UP	197	-0.420044	-1.6345	0.0288066	0.313439	0.444	8537	tags=40%, list=21%, signal=50%
GSE36078_WT_VS_IL1R_KO_LUNG_DC_AFTER_AD5_INF_UP	200	0.572181	2.21642	0	0.000563391	0.01	4501	tags=41%, list=11%, signal=46%	GSE19825_CD24LOW_VS_IL2RA_HIGH_DAY3_EFF_CD8_TCELL_DN	200	-0.531818	-1.7802	0.0294118	0.504281	0.277	5202	tags=40%, list=13%, signal=46%
GSE28726_NAIVE_VS_ACTIVATED_CD4_TCELL_UP	200	0.577853	2.21481	0	0.000564279	0.01	5375	tags=45%, list=13%, signal=52%	GSE36888_UNTREATED_VS_IL2_TREATED_STAT5_AB_KNOCKIN_TCELL_6H_DN	200	-0.46788	-1.70227	0.0294737	0.376503	0.366	6976	tags=43%, list=17%, signal=51%
GSE19888_ADENOSINE_A3R_INH_VS_ACT_IN_MAST_CELL_DN	199	0.581261	2.21245	0	0.000547682	0.01	3545	tags=32%, list=9%, signal=35%	GSE41867_DAY8_EFFECTOR_VS_DAY30_MEMORY_CD8_TCELL_LCMV_ARMSTRONG_UP	200	-0.494096	-1.68184	0.0297872	0.333681	0.396	7684	tags=45%, list=19%, signal=55%
GSE30083_SP2_VS_SP4_THYMOCYTE_DN	199	0.620296	2.21187	0	0.000532034	0.01	5180	tags=48%, list=13%, signal=55%	GSE31082_DN_VS_CD8_SP_THYMOCYTE_UP	200	-0.528216	-1.76452	0.031185	0.481089	0.303	6293	tags=44%, list=16%, signal=52%
GSE24634_TEFF_VS_TCONV_DAY3_IN_CULTURE_DN	200	0.654156	2.20887	0	0.000533719	0.01	3982	tags=47%, list=10%, signal=52%	GSE7568_IL4_TGFB_DEXAMETHASONE_VS_IL4_TGFB_TREATED_MACROPHAGE_UP	172	-0.501452	-1.69706	0.0313808	0.356384	0.372	9055	tags=47%, list=23%, signal=61%
GSE17974_IL4_AND_ANTI_IL12_VS_UNTREATED_12H_ACT_CD4_TCELL_DN	190	0.538829	2.20551	0	0.000604327	0.011	3794	tags=30%, list=9%, signal=33%	GSE2770_UNTREATED_VS_ACT_CD4_TCELL_2H_DN	200	-0.48911	-1.69527	0.0315126	0.354652	0.374	9192	tags=46%, list=23%, signal=59%
GSE22886_DC_VS_MONOCYTE_DN	199	0.628513	2.2055	0	0.000588423	0.011	5035	tags=48%, list=13%, signal=54%	GSE3982_MEMORY_CD4_TCELL_VS_TH1_DN	198	-0.478516	-1.69302	0.0319361	0.342764	0.377	5377	tags=43%, list=13%, signal=49%
GSE46606_IRF4_KO_VS_WT_UNSTIM_BCELL_DN	199	0.568002	2.19035	0	0.000809435	0.014	4328	tags=39%, list=11%, signal=44%	GSE18893_TCONV_VS_TREG_24H_TNF_STIM_UP	200	-0.580957	-1.72898	0.0328542	0.457996	0.343	10466	tags=64%, list=26%, signal=85%
GSE1432_CTRL_VS_IFNG_24H_MICROGLIA_DN	200	0.691994	2.18918	0	0.000819106	0.014	4209	tags=52%, list=10%, signal=57%	GSE6090_UNSTIM_VS_DC_SIGN_STIM_DC_UP	166	-0.50458	-1.71723	0.0334728	0.407349	0.359	8114	tags=48%, list=20%, signal=60%
GSE24634_IL4_VS_CTRL_TREATED_NAIVE_CD4_TCELL_DAY5_UP	200	0.598922	2.18677	0	0.00081431	0.014	3547	tags=37%, list=9%, signal=40%	GSE5099_UNSTIM_VS_MCSF_TREATED_MONOCYTE_DAY7_UP	200	-0.522525	-1.73851	0.0337553	0.496888	0.331	6681	tags=48%, list=17%, signal=57%
GSE29618_PDC_VS_MDC_DN	200	0.650374	2.18548	0	0.000843967	0.014	2876	tags=44%, list=7%, signal=47%	GSE22432_MULTIPOTENT_PROGENITOR_VS_PDC_DN	200	-0.496121	-1.71567	0.0339703	0.402607	0.359	8100	tags=49%, list=20%, signal=60%
GSE12845_PRE_GC_VS_DARKZONE_GC_TONSIL_BCELL_UP	196	0.573987	2.18539	0	0.000824339	0.014	4488	tags=45%, list=11%, signal=51%	GSE369_SOCS3_KO_VS_WT_LIVER_UP	199	-0.480384	-1.6664	0.0355649	0.3389	0.418	6702	tags=41%, list=17%, signal=49%
GSE32986_CURDLAN_HIGHDOSE_VS_GMCSF_AND_CURDLAN_HIGHDOSE_STIM_DC_DN	199	0.634582	2.18533	0	0.000805604	0.014	3911	tags=45%, list=10%, signal=50%	GSE16385_ROSIGLITAZONE_IL4_VS_ROSIGLITAZONE_ALONE_STIM_MACROPHAGE_DN	200	-0.458288	-1.66575	0.0360934	0.3357	0.418	8231	tags=42%, list=20%, signal=53%
GSE10325_CD4_TCELL_VS_BCELL_DN	195	0.65567	2.18269	0	0.000814706	0.014	4861	tags=56%, list=12%, signal=63%	GSE4811_CLASSSICALY_ACTIVATED_VS_TYPE_2_ACTIVATED_MACROPHAGE_UP	199	-0.411019	-1.62759	0.0361702	0.312891	0.456	8601	tags=40%, list=21%, signal=51%
GSE2770_IL12_AND_TGFB_VS_IL4_TREATED_ACT_CD4_TCELL_48H_DN	194	0.559166	2.17554	0	0.000939904	0.014	2120	tags=30%, list=5%, signal=31%	GSE21379_TFH_VS_NON_TFH_SAP_KO_CD4_TCELL_UP	200	-0.445268	-1.65493	0.0363248	0.323757	0.432	6875	tags=37%, list=17%, signal=44%
GSE2706_UNSTIM_VS_2H_LPS_AND_R848_DC_DN	190	0.629221	2.17454	0	0.000932633	0.014	5068	tags=50%, list=13%, signal=57%	GSE22886_UNSTIM_VS_STIM_MEMORY_TCELL_DN	200	-0.539062	-1.73641	0.0367347	0.472559	0.336	8279	tags=52%, list=21%, signal=66%
GSE22886_DAY0_VS_DAY7_MONOCYTE_IN_CULTURE_UP	198	0.640729	2.17415	0	0.000913203	0.014	4770	tags=50%, list=12%, signal=56%	GSE37532_TREG_VS_TCONV_CD4_TCELL_FROM_VISCERAL_ADIPOSE_TISSUE_DN	169	-0.523389	-1.69498	0.0368764	0.349151	0.374	8934	tags=56%, list=22%, signal=71%
GSE29618_PDC_VS_MDC_DAY7_FLU_VACCINE_DN	200	0.650347	2.17374	0	0.000906773	0.014	4957	tags=52%, list=12%, signal=59%	GSE15330_GRANULOCYTE_MONOCYTE_PROGENITOR_VS_PRO_BCELL_UP	198	-0.479539	-1.70458	0.036961	0.393266	0.366	9110	tags=47%, list=23%, signal=61%
GSE40274_CTRL_VS_GATA1_TRANSDUCED_ACTIVATED_CD4_TCELL_UP	147	0.584269	2.17344	0	0.000888637	0.014	5914	tags=52%, list=15%, signal=60%	GSE12366_GC_VS_NAIVE_BCELL_UP	198	-0.495186	-1.71797	0.0375	0.415048	0.359	5294	tags=40%, list=13%, signal=46%
GSE25123_CTRL_VS_ROSIGLITAZONE_STIM_PPARG_KO_MACROPHAGE_UP	196	0.601828	2.17294	0	0.000882834	0.014	3794	tags=38%, list=9%, signal=42%	GSE41867_DAY6_VS_DAY8_LCMV_ARMSTRONG_EFFECTOR_CD8_TCELL_DN	200	-0.508578	-1.70429	0.0375783	0.385961	0.366	9286	tags=46%, list=23%, signal=60%
GSE21360_PRIMARY_VS_TERTIARY_MEMORY_CD8_TCELL_DN	200	0.626916	2.17282	0	0.000865857	0.014	3332	tags=45%, list=8%, signal=48%	GSE24026_PD1_LIGATION_VS_CTRL_IN_ACT_TCELL_LINE_DN	200	-0.524674	-1.70339	0.0378151	0.3807	0.366	9918	tags=58%, list=25%, signal=77%
GSE2706_UNSTIM_VS_2H_R848_DC_DN	194	0.606144	2.17268	0	0.00084952	0.014	5026	tags=46%, list=12%, signal=53%	GSE28237_EARLY_VS_LATE_GC_BCELL_UP	200	-0.381759	-1.54058	0.0378947	0.270639	0.559	11580	tags=44%, list=29%, signal=61%
GSE18281_CORTICAL_VS_MEDULLARY_THYMOCYTE_UP	199	0.617641	2.16999	0	0.000890726	0.014	4052	tags=43%, list=10%, signal=47%	GSE41867_DAY15_EFFECTOR_VS_DAY30_EXHAUSTED_CD8_TCELL_LCMV_CLONE13_DN	200	-0.513474	-1.70729	0.038055	0.410853	0.362	8901	tags=50%, list=22%, signal=63%
GSE2706_UNSTIM_VS_2H_LPS_DC_DN	192	0.604842	2.16619	0	0.000986984	0.014	4311	tags=43%, list=11%, signal=48%	GSE45365_WT_VS_IFNAR_KO_CD11B_DC_DN	190	-0.411764	-1.58065	0.0381356	0.282704	0.518	6015	tags=35%, list=15%, signal=41%
GSE3039_ALPHAALPHA_VS_ALPHABETA_CD8_TCELL_DN	200	0.594518	2.16341	0	0.00106458	0.014	3359	tags=38%, list=8%, signal=41%	GSE41867_NAIVE_VS_DAY30_LCMV_ARMSTRONG_MEMORY_CD8_TCELL_DN	199	-0.486944	-1.67185	0.0391753	0.334463	0.412	9318	tags=48%, list=23%, signal=62%
GSE24634_TREG_VS_TCONV_POST_DAY10_IL4_CONVERSION_DN	200	0.638224	2.16335	0	0.00104623	0.014	5422	tags=52%, list=13%, signal=60%	GSE13547_WT_VS_ZFX_KO_BCELL_ANTI_IGM_STIM_2H_UP	181	-0.54057	-1.73072	0.039666	0.480505	0.342	7695	tags=55%, list=19%, signal=67%
GSE24026_PD1_LIGATION_VS_CTRL_IN_ACT_TCELL_LINE_UP	196	0.577863	2.16305	0	0.00103852	0.015	2816	tags=36%, list=7%, signal=39%	GSE7460_CD8_TCELL_VS_TREG_ACT_DN	199	-0.518288	-1.71133	0.04	0.406876	0.359	8145	tags=50%, list=20%, signal=63%
GSE10325_LUPUS_CD4_TCELL_VS_LUPUS_BCELL_DN	196	0.650388	2.16059	0	0.00106244	0.015	4906	tags=54%, list=12%, signal=61%	GSE37532_TREG_VS_TCONV_CD4_TCELL_FROM_LN_UP	200	-0.497137	-1.72702	0.0401606	0.439456	0.347	8608	tags=49%, list=21%, signal=61%
GSE36826_WT_VS_IL1R_KO_SKIN_UP	197	0.589174	2.15966	0	0.00108462	0.015	4402	tags=41%, list=11%, signal=45%	GSE42021_CD24HI_VS_CD24INT_TREG_THYMUS_UP	200	-0.434711	-1.63295	0.0406852	0.313762	0.446	5957	tags=33%, list=15%, signal=38%
GSE42021_CD24HI_VS_CD24INT_TREG_THYMUS_DN	200	0.719915	2.15891	0	0.00107678	0.015	5446	tags=63%, list=14%, signal=72%	GSE37416_CTRL_VS_48H_F_TULARENSIS_LVS_NEUTROPHIL_DN	198	-0.461218	-1.63606	0.0412371	0.313127	0.442	8136	tags=47%, list=20%, signal=59%
GSE18804_SPLEEN_MACROPHAGE_VS_COLON_TUMORAL_MACROPHAGE_UP	200	0.569386	2.15741	0	0.00107867	0.015	4198	tags=39%, list=10%, signal=43%	GSE6674_ANTI_IGM_VS_ANTI_IGM_AND_CPG_STIM_BCELL_DN	198	-0.497577	-1.7071	0.04158	0.402258	0.362	5979	tags=42%, list=15%, signal=50%
GSE3337_4H_VS_16H_IFNG_IN_CD8POS_DC_DN	200	0.56533	2.15578	0	0.0010896	0.015	3680	tags=38%, list=9%, signal=41%	GSE14000_TRANSLATED_RNA_VS_MRNA_4H_LPS_DC_UP	199	-0.532848	-1.68108	0.0419287	0.330478	0.397	10201	tags=56%, list=25%, signal=75%
GSE9650_NAIVE_VS_MEMORY_CD8_TCELL_DN	200	0.579048	2.15294	0	0.0011484	0.016	3860	tags=38%, list=10%, signal=41%	GSE26488_WT_VS_HDAC7_KO_DOUBLE_POSITIVE_THYMOCYTE_UP	193	-0.444316	-1.6559	0.0421941	0.333363	0.432	5340	tags=32%, list=13%, signal=36%
GSE10325_LUPUS_CD4_TCELL_VS_LUPUS_BCELL_UP	199	0.635155	2.14417	0	0.00134548	0.018	2816	tags=39%, list=7%, signal=42%	GSE7509_FCGRIIB_VS_TNFA_IL1B_IL6_PGE_STIM_DC_UP	185	-0.471996	-1.62317	0.0425532	0.316347	0.46	7538	tags=42%, list=19%, signal=52%
GSE41176_UNSTIM_VS_ANTI_IGM_STIM_BCELL_1H_DN	199	0.603823	2.14407	0	0.00134306	0.018	4406	tags=43%, list=11%, signal=48%	GSE13485_DAY1_VS_DAY21_YF17D_VACCINE_PBMC_DN	196	-0.501826	-1.67855	0.0426439	0.332089	0.402	8634	tags=48%, list=21%, signal=61%
GSE17301_ACD3_ACD28_VS_ACD3_ACD28_AND_IFNA5_STIM_CD8_TCELL_DN	200	0.617819	2.1392	0	0.00153981	0.021	3296	tags=40%, list=8%, signal=43%	GSE22432_MULTIPOTENT_VS_COMMON_DC_PROGENITOR_UNTREATED_UP	200	-0.506609	-1.70017	0.0429448	0.36803	0.368	9465	tags=51%, list=24%, signal=66%
GSE29618_MONOCYTE_VS_PDC_DAY7_FLU_VACCINE_UP	199	0.64583	2.13627	0	0.0016673	0.023	3955	tags=47%, list=10%, signal=52%	GSE2770_IL12_AND_TGFB_VS_IL4_TREATED_ACT_CD4_TCELL_6H_UP	200	-0.484834	-1.68662	0.0433884	0.34826	0.387	10809	tags=53%, list=27%, signal=72%
GSE24574_NAIVE_VS_TCONV_CD4_TCELL_UP	200	0.535112	2.13622	0	0.00164348	0.023	4770	tags=38%, list=12%, signal=43%	GSE31082_DN_VS_DP_THYMOCYTE_UP	199	-0.480602	-1.63898	0.0433884	0.319759	0.439	9026	tags=44%, list=22%, signal=57%
GSE22886_NAIVE_BCELL_VS_NEUTROPHIL_DN	199	0.601764	2.13578	0	0.00166259	0.024	3946	tags=38%, list=10%, signal=42%	GSE17721_CPG_VS_GARDIQUIMOD_1H_BMDC_DN	200	-0.489152	-1.72435	0.0434783	0.425283	0.351	7411	tags=47%, list=18%, signal=57%
GSE23505_UNTREATED_VS_4DAY_IL6_IL1_IL23_TREATED_CD4_TCELL_DN	199	0.557697	2.13207	0	0.0018436	0.024	4410	tags=39%, list=11%, signal=43%	GSE14350_TREG_VS_TEFF_DN	200	-0.345596	-1.44979	0.0434783	0.256597	0.657	7975	tags=31%, list=20%, signal=38%
GSE10325_LUPUS_BCELL_VS_LUPUS_MYELOID_DN	200	0.631847	2.1305	0	0.00185946	0.024	3955	tags=46%, list=10%, signal=50%	GSE18791_CTRL_VS_NEWCASTLE_VIRUS_DC_8H_UP	199	-0.481184	-1.65335	0.0442105	0.319563	0.433	9211	tags=54%, list=23%, signal=69%
GSE43863_LY6C_INT_CXCR5POS_VS_LY6C_LOW_CXCR5NEG_EFFECTOR_CD4_TCELL_DN	200	0.540657	2.1269	0	0.00192253	0.024	3889	tags=37%, list=10%, signal=40%	GSE17721_POLYIC_VS_PAM3CSK4_6H_BMDC_DN	199	-0.435103	-1.60688	0.0443038	0.294107	0.474	5175	tags=36%, list=13%, signal=41%
GSE40685_TREG_VS_FOXP3_KO_TREG_PRECURSOR_DN	199	0.646138	2.12582	0	0.001968	0.024	3403	tags=46%, list=8%, signal=50%	GSE1460_INTRATHYMIC_T_PROGENITOR_VS_NAIVE_CD4_TCELL_ADULT_BLOOD_UP	199	-0.513942	-1.72747	0.0443548	0.450519	0.347	9642	tags=58%, list=24%, signal=76%
GSE42021_CD24HI_VS_CD24LOW_TCONV_THYMUS_DN	198	0.683477	2.12525	0	0.00200206	0.024	3350	tags=49%, list=8%, signal=53%	GSE2770_UNTREATED_VS_IL4_TREATED_ACT_CD4_TCELL_2H_DN	200	-0.460116	-1.62104	0.044586	0.309052	0.46	9121	tags=45%, list=23%, signal=57%
GSE20715_0H_VS_48H_OZONE_TLR4_KO_LUNG_UP	200	0.555346	2.12337	0	0.00206012	0.025	3513	tags=34%, list=9%, signal=37%	GSE21546_SAP1A_KO_VS_SAP1A_KO_AND_ELK1_KO_ANTI_CD3_STIM_DP_THYMOCYTES_UP	200	-0.425739	-1.59412	0.0446809	0.287833	0.494	6749	tags=37%, list=17%, signal=44%
GSE41867_MEMORY_VS_EXHAUSTED_CD8_TCELL_DAY30_LCMV_UP	199	0.597088	2.1233	0	0.00203404	0.025	3296	tags=37%, list=8%, signal=40%	GSE7218_UNSTIM_VS_ANTIGEN_STIM_THROUGH_IGG_BCELL_UP	187	-0.483142	-1.68362	0.0450644	0.334184	0.394	10366	tags=49%, list=26%, signal=65%
GSE27670_BLIMP1_VS_LMP1_TRANSDUCED_GC_BCELL_UP	199	0.54889	2.12273	0	0.00203817	0.025	3955	tags=39%, list=10%, signal=43%	GSE29615_CTRL_VS_DAY3_LAIV_IFLU_VACCINE_PBMC_UP	190	-0.444487	-1.60151	0.0454545	0.295401	0.479	6480	tags=37%, list=16%, signal=44%
GSE45365_NK_CELL_VS_CD8_TCELL_MCMV_INFECTION_DN	200	0.555022	2.12214	0	0.0020204	0.025	3781	tags=37%, list=9%, signal=41%	GSE3982_MAST_CELL_VS_NKCELL_UP	199	-0.418892	-1.56662	0.0456432	0.281493	0.533	8817	tags=43%, list=22%, signal=54%
GSE10325_CD4_TCELL_VS_BCELL_UP	198	0.612521	2.12138	0	0.00199313	0.025	2816	tags=36%, list=7%, signal=39%	GSE10239_MEMORY_VS_KLRG1INT_EFF_CD8_TCELL_DN	200	-0.500631	-1.67553	0.0458333	0.329966	0.408	10455	tags=58%, list=26%, signal=79%
KAECH_NAIVE_VS_MEMORY_CD8_TCELL_DN	200	0.573899	2.11812	0	0.00205136	0.025	4529	tags=40%, list=11%, signal=45%	GSE2770_TGFB_AND_IL4_VS_IL12_TREATED_ACT_CD4_TCELL_6H_DN	199	-0.445372	-1.62266	0.0461216	0.311557	0.46	9990	tags=47%, list=25%, signal=63%
GSE21670_UNTREATED_VS_IL6_TREATED_STAT3_KO_CD4_TCELL_UP	200	0.623091	2.11641	0	0.00213855	0.026	4345	tags=46%, list=11%, signal=51%	GSE36476_CTRL_VS_TSST_ACT_40H_MEMORY_CD4_TCELL_OLD_DN	200	-0.564156	-1.71923	0.0462777	0.42105	0.358	6126	tags=52%, list=15%, signal=60%
GSE42021_CD24HI_VS_CD24INT_TCONV_THYMUS_DN	200	0.570318	2.11311	0	0.00223189	0.027	5023	tags=44%, list=12%, signal=49%	GSE22886_NAIVE_CD4_TCELL_VS_48H_ACT_TH2_DN	200	-0.512211	-1.69904	0.0463158	0.364276	0.368	10581	tags=60%, list=26%, signal=81%
GSE3565_CTRL_VS_LPS_INJECTED_DUSP1_KO_SPLENOCYTES_UP	181	0.60105	2.11185	0	0.00224071	0.027	3511	tags=38%, list=9%, signal=42%	GSE14308_INDUCED_VS_NATURAL_TREG_UP	200	-0.420515	-1.56932	0.0468085	0.280058	0.528	5109	tags=31%, list=13%, signal=35%
GSE22935_WT_VS_MYD88_KO_MACROPHAGE_UP	200	0.620024	2.11146	0	0.00224254	0.027	2865	tags=41%, list=7%, signal=44%	GSE3982_MAST_CELL_VS_NEUTROPHIL_UP	199	-0.454371	-1.64019	0.0473251	0.327466	0.439	8428	tags=45%, list=21%, signal=56%
GSE26495_NAIVE_VS_PD1LOW_CD8_TCELL_DN	199	0.610745	2.11124	0	0.00222418	0.027	2587	tags=34%, list=6%, signal=36%	GSE17721_POLYIC_VS_CPG_16H_BMDC_DN	199	-0.432689	-1.61927	0.0476191	0.310148	0.461	5580	tags=37%, list=14%, signal=43%
GSE1740_MCSF_VS_MCSF_AND_IFNG_DAY2_DERIVED_MACROPHAGE_UP	193	0.526894	2.11035	0	0.00224767	0.028	2060	tags=25%, list=5%, signal=26%	GSE17721_POLYIC_VS_GARDIQUIMOD_6H_BMDC_DN	199	-0.448768	-1.61208	0.0486258	0.306141	0.468	5056	tags=36%, list=13%, signal=41%
GSE22886_CD4_TCELL_VS_BCELL_NAIVE_UP	198	0.586886	2.10967	0	0.00226192	0.028	2812	tags=34%, list=7%, signal=37%	GSE21927_SPLEEN_VS_C26GM_TUMOR_MONOCYTE_BALBC_DN	193	-0.455824	-1.63009	0.0488323	0.31658	0.452	10406	tags=50%, list=26%, signal=67%
GSE24634_TEFF_VS_TCONV_DAY5_IN_CULTURE_DN	199	0.580784	2.10448	0	0.00246658	0.029	4163	tags=41%, list=10%, signal=46%	GSE24634_TEFF_VS_TCONV_DAY5_IN_CULTURE_UP	200	-0.545773	-1.73908	0.0488798	0.51301	0.33	5837	tags=50%, list=15%, signal=58%
GSE17580_UNINFECTED_VS_S_MANSONI_INF_TEFF_DN	200	0.523762	2.10389	0	0.00246555	0.03	3428	tags=31%, list=9%, signal=34%	GSE5542_IFNG_VS_IFNA_TREATED_EPITHELIAL_CELLS_6H_UP	200	-0.492325	-1.65173	0.0489362	0.312475	0.433	9230	tags=52%, list=23%, signal=66%
GSE29618_MONOCYTE_VS_MDC_UP	198	0.615882	2.10327	0	0.00248339	0.03	3955	tags=45%, list=10%, signal=50%	GSE37532_WT_VS_PPARG_KO_VISCERAL_ADIPOSE_TISSUE_TREG_UP	198	-0.53603	-1.69781	0.0491803	0.360797	0.371	8443	tags=54%, list=21%, signal=68%
GSE2935_UV_INACTIVATED_VS_LIVE_SENDAI_VIRUS_INF_MACROPHAGE_DN	180	0.594871	2.10056	0	0.00259302	0.031	3299	tags=37%, list=8%, signal=40%	GSE12507_PDC_CELL_LINE_VS_IMMATUE_T_CELL_LINE_UP	153	-0.465884	-1.5741	0.0498915	0.283788	0.524	6965	tags=42%, list=17%, signal=50%
GSE28726_NAIVE_CD4_TCELL_VS_NAIVE_NKTCELL_DN	200	0.52381	2.10006	0	0.00259076	0.031	4608	tags=37%, list=11%, signal=42%
GSE19888_CTRL_VS_TCELL_MEMBRANES_ACT_MAST_CELL_PRETREAT_A3R_INH_DN	200	0.627529	2.09147	0	0.00295024	0.032	4351	tags=49%, list=11%, signal=54%
GSE21670_STAT3_KO_VS_WT_CD4_TCELL_TGFB_IL6_TREATED_DN	200	0.640378	2.09079	0	0.00295102	0.032	4957	tags=49%, list=12%, signal=56%
GSE22601_IMMATURE_CD4_SINGLE_POSITIVE_VS_CD8_SINGLE_POSITIVE_THYMOCYTE_UP	199	0.586523	2.09055	0	0.00292767	0.032	4597	tags=44%, list=11%, signal=49%
GSE21360_TERTIARY_VS_QUATERNARY_MEMORY_CD8_TCELL_DN	176	0.574371	2.09018	0	0.00292226	0.032	3979	tags=37%, list=10%, signal=41%
GSE22140_GERMFREE_VS_SPF_MOUSE_CD4_TCELL_UP	199	0.611957	2.08851	0	0.00299574	0.033	3391	tags=43%, list=8%, signal=46%
GSE22196_HEALTHY_VS_OBESE_MOUSE_SKIN_GAMMADELTA_TCELL_UP	199	0.593351	2.08551	0	0.0031239	0.034	3391	tags=41%, list=8%, signal=45%
GSE17974_IL4_AND_ANTI_IL12_VS_UNTREATED_24H_ACT_CD4_TCELL_DN	194	0.530482	2.08271	0	0.00320796	0.034	4908	tags=36%, list=12%, signal=40%
GSE13522_CTRL_VS_T_CRUZI_Y_STRAIN_INF_SKIN_IFNAR_KO_DN	199	0.535002	2.08202	0	0.00325779	0.035	5276	tags=42%, list=13%, signal=48%
GSE24634_IL4_VS_CTRL_TREATED_NAIVE_CD4_TCELL_DAY5_DN	199	0.589173	2.0816	0	0.00321418	0.035	4209	tags=41%, list=10%, signal=45%
GSE43863_NAIVE_VS_MEMORY_TH1_CD4_TCELL_D150_LCMV_UP	186	0.535833	2.08126	0	0.00320195	0.035	4209	tags=34%, list=10%, signal=38%
GSE1432_1H_VS_24H_IFNG_MICROGLIA_DN	200	0.638746	2.08016	0	0.00323259	0.035	2945	tags=45%, list=7%, signal=48%
GSE22140_HEALTHY_VS_ARTHRITIC_MOUSE_CD4_TCELL_UP	197	0.549872	2.07771	0	0.00329685	0.036	3268	tags=36%, list=8%, signal=38%
GSE3400_UNTREATED_VS_IFNB_TREATED_MEF_DN	193	0.506347	2.07678	0	0.00331079	0.036	3458	tags=26%, list=9%, signal=29%
GSE2706_2H_VS_8H_R848_STIM_DC_UP	194	0.517383	2.07577	0	0.00331367	0.036	4762	tags=37%, list=12%, signal=41%
GSE4590_SMALL_VS_LARGE_PRE_BCELL_UP	175	0.544901	2.07518	0	0.00331579	0.037	3359	tags=33%, list=8%, signal=35%
GSE41867_DAY6_EFFECTOR_VS_DAY30_EXHAUSTED_CD8_TCELL_LCMV_CLONE13_UP	200	0.564781	2.06971	0	0.00353163	0.039	5286	tags=45%, list=13%, signal=52%
GSE22886_NAIVE_CD4_TCELL_VS_DC_UP	197	0.57153	2.06814	0	0.00357759	0.039	4004	tags=41%, list=10%, signal=45%
GSE1460_DP_VS_CD4_THYMOCYTE_DN	200	0.560588	2.06807	0	0.00355981	0.039	4188	tags=40%, list=10%, signal=44%
GSE19198_1H_VS_24H_IL21_TREATED_TCELL_UP	200	0.557671	2.06792	0	0.00353507	0.039	3640	tags=35%, list=9%, signal=38%
GSE37534_GW1929_VS_PIOGLITAZONE_TREATED_CD4_TCELL_PPARG1_FOXP3_TRANSDUCED_UP	198	0.51881	2.06235	0	0.00379521	0.041	5661	tags=39%, list=14%, signal=46%
GSE360_T_GONDII_VS_M_TUBERCULOSIS_DC_DN	199	0.538251	2.06163	0	0.00381276	0.041	4016	tags=37%, list=10%, signal=41%
GSE22886_NAIVE_CD8_TCELL_VS_MONOCYTE_DN	200	0.631378	2.05847	0	0.00396311	0.042	3955	tags=46%, list=10%, signal=50%
GSE2128_CTRL_VS_MIMETOPE_NEGATIVE_SELECTION_DP_THYMOCYTE_NOD_UP	200	0.55305	2.05522	0	0.0040853	0.045	4547	tags=39%, list=11%, signal=43%
GSE3982_MEMORY_CD4_TCELL_VS_BCELL_UP	199	0.543185	2.05265	0	0.00419011	0.046	2507	tags=26%, list=6%, signal=28%
GSE23114_PERITONEAL_CAVITY_B1A_BCELL_VS_SPLEEN_BCELL_IN_SLE2C1_MOUSE_UP	199	0.52806	2.05005	0	0.00427385	0.047	4182	tags=35%, list=10%, signal=39%
GSE12366_GC_VS_NAIVE_BCELL_DN	195	0.591421	2.04885	0	0.00436575	0.048	5121	tags=47%, list=13%, signal=54%
KAECH_NAIVE_VS_DAY15_EFF_CD8_TCELL_DN	200	0.54237	2.04842	0	0.00436428	0.048	3773	tags=32%, list=9%, signal=35%
GSE34156_TLR1_TLR2_LIGAND_VS_NOD2_AND_TLR1_TLR2_LIGAND_24H_TREATED_MONOCYTE_UP	195	0.613621	2.04659	0	0.00444953	0.048	3948	tags=45%, list=10%, signal=49%
GSE19198_6H_VS_24H_IL21_TREATED_TCELL_UP	199	0.522467	2.04622	0	0.00442949	0.048	4015	tags=35%, list=10%, signal=39%
GSE24634_TREG_VS_TCONV_POST_DAY7_IL4_CONVERSION_DN	198	0.586189	2.04429	0	0.00452649	0.048	5393	tags=52%, list=13%, signal=59%
GSE20715_0H_VS_24H_OZONE_LUNG_UP	200	0.559502	2.04411	0	0.00452388	0.048	4651	tags=42%, list=12%, signal=47%
GSE30083_SP3_VS_SP4_THYMOCYTE_DN	199	0.557636	2.0318	0	0.00512299	0.053	4912	tags=43%, list=12%, signal=48%
GSE21546_SAP1A_KO_VS_SAP1A_KO_AND_ELK1_KO_ANTI_CD3_STIM_DP_THYMOCYTES_DN	200	0.537029	2.02915	0	0.005273	0.053	3593	tags=35%, list=9%, signal=38%
GSE24142_EARLY_THYMIC_PROGENITOR_VS_DN2_THYMOCYTE_UP	200	0.570625	2.02475	0	0.00552517	0.056	3111	tags=37%, list=8%, signal=39%
GSE1740_UNSTIM_VS_IFNA_STIMULATED_MCSF_DERIVED_MACROPHAGE_DN	192	0.551187	2.02466	0	0.00549273	0.056	2556	tags=30%, list=6%, signal=32%
GSE1112_HY_CD8AB_VS_HY_CD8AA_THYMOCYTE_RTOC_CULTURE_UP	193	0.531418	2.02315	0	0.00550564	0.057	2719	tags=28%, list=7%, signal=30%
GSE36888_UNTREATED_VS_IL2_TREATED_TCELL_6H_UP	193	0.533356	2.02305	0	0.00547796	0.057	3578	tags=34%, list=9%, signal=37%
GSE16450_CTRL_VS_IFNA_6H_STIM_IMMATURE_NEURON_CELL_LINE_DN	194	0.579149	2.02222	0	0.00550592	0.058	3569	tags=39%, list=9%, signal=42%
GSE43863_NAIVE_VS_TFH_CD4_EFF_TCELL_D6_LCMV_DN	192	0.468449	2.01818	0	0.00571291	0.058	4555	tags=30%, list=11%, signal=34%
GSE10325_LUPUS_CD4_TCELL_VS_LUPUS_MYELOID_UP	199	0.577445	2.01491	0	0.00594393	0.059	2778	tags=33%, list=7%, signal=35%
GSE15330_LYMPHOID_MULTIPOTENT_VS_MEGAKARYOCYTE_ERYTHROID_PROGENITOR_IKAROS_KO_DN	178	0.544776	2.01405	0	0.00596641	0.06	2971	tags=29%, list=7%, signal=31%
GSE7852_TREG_VS_TCONV_THYMUS_UP	200	0.531787	2.01177	0	0.00607082	0.06	2936	tags=29%, list=7%, signal=32%
GOLDRATH_NAIVE_VS_MEMORY_CD8_TCELL_DN	200	0.542695	2.01053	0	0.0061434	0.062	3640	tags=34%, list=9%, signal=37%
GSE34156_NOD2_LIGAND_VS_TLR1_TLR2_LIGAND_6H_TREATED_MONOCYTE_DN	196	0.571177	2.00543	0	0.00651058	0.068	3865	tags=40%, list=10%, signal=44%
GSE2405_HEAT_KILLED_LYSATE_VS_LIVE_A_PHAGOCYTOPHILUM_STIM_NEUTROPHIL_24H_UP	199	0.520411	2.00364	0	0.00660246	0.07	4625	tags=35%, list=11%, signal=39%
GSE3982_MAST_CELL_VS_NKCELL_DN	199	0.50949	2.0036	0	0.00656688	0.07	5037	tags=37%, list=13%, signal=42%
GSE24634_TEFF_VS_TCONV_DAY10_IN_CULTURE_DN	200	0.560997	2.00246	0	0.00658186	0.07	5489	tags=48%, list=14%, signal=55%
GSE24634_TREG_VS_TCONV_POST_DAY3_IL4_CONVERSION_DN	200	0.582558	1.99952	0	0.00672312	0.072	4236	tags=45%, list=11%, signal=49%
GSE17301_CTRL_VS_48H_ACD3_ACD28_STIM_CD8_TCELL_DN	198	0.526841	1.99092	0	0.00747292	0.08	3906	tags=36%, list=10%, signal=40%
GSE24142_EARLY_THYMIC_PROGENITOR_VS_DN3_THYMOCYTE_DN	198	0.522527	1.98962	0	0.00748032	0.08	4353	tags=35%, list=11%, signal=39%
KAECH_DAY15_EFF_VS_MEMORY_CD8_TCELL_UP	199	0.501859	1.98625	0	0.00773071	0.081	3359	tags=31%, list=8%, signal=33%
GSE40443_INDUCED_VS_TOTAL_TREG_DN	199	0.511422	1.98545	0	0.00771808	0.083	4554	tags=36%, list=11%, signal=41%
GSE21033_CTRL_VS_POLYIC_STIM_DC_12H_UP	160	0.548762	1.97975	0	0.0081342	0.09	4396	tags=37%, list=11%, signal=41%
GSE16266_CTRL_VS_LPS_STIM_MEF_DN	200	0.484452	1.9795	0	0.00808399	0.09	4836	tags=36%, list=12%, signal=41%
GSE3565_DUSP1_VS_WT_SPLENOCYTES_UP	163	0.569939	1.97621	0	0.00818133	0.095	4529	tags=38%, list=11%, signal=43%
GSE21063_WT_VS_NFATC1_KO_3H_ANTI_IGM_STIM_BCELL_UP	199	0.478257	1.97542	0	0.00814623	0.095	4651	tags=34%, list=12%, signal=38%
GSE33374_CD8_ALPHAALPHA_VS_ALPHABETA_CD161_HIGH_TCELL_DN	200	0.528605	1.97512	0	0.00812284	0.095	4101	tags=37%, list=10%, signal=41%
GSE22886_CD8_TCELL_VS_BCELL_NAIVE_UP	198	0.523616	1.9681	0	0.00862069	0.103	2816	tags=30%, list=7%, signal=32%
GSE7460_TCONV_VS_TREG_THYMUS_DN	200	0.522762	1.96598	0	0.00880481	0.103	2544	tags=29%, list=6%, signal=30%
GSE41867_DAY15_EFFECTOR_VS_DAY30_EXHAUSTED_CD8_TCELL_LCMV_CLONE13_UP	199	0.540542	1.95763	0	0.0093131	0.111	5198	tags=41%, list=13%, signal=47%
GSE30962_PRIMARY_VS_SECONDARY_CHRONIC_LCMV_INF_CD8_TCELL_DN	199	0.498926	1.95607	0	0.00948375	0.112	4064	tags=31%, list=10%, signal=34%
GSE21033_CTRL_VS_POLYIC_STIM_DC_24H_UP	157	0.52501	1.94793	0	0.0101184	0.117	4918	tags=41%, list=12%, signal=46%
GSE11864_CSF1_PAM3CYS_VS_CSF1_IFNG_PAM3CYS_IN_MAC_DN	192	0.54431	1.94178	0	0.0103703	0.123	4185	tags=36%, list=10%, signal=40%
GSE2405_0H_VS_1.5H_A_PHAGOCYTOPHILUM_STIM_NEUTROPHIL_UP	200	0.481697	1.93101	0	0.0112185	0.136	3955	tags=33%, list=10%, signal=36%
GSE360_CTRL_VS_L_MAJOR_DC_DN	198	0.48113	1.93082	0	0.0111353	0.136	4209	tags=33%, list=10%, signal=36%
GSE3920_IFNA_VS_IFNB_TREATED_ENDOTHELIAL_CELL_DN	166	0.541572	1.92734	0	0.011492	0.138	3980	tags=36%, list=10%, signal=40%
GSE3982_BCELL_VS_CENT_MEMORY_CD4_TCELL_UP	198	0.490551	1.91434	0	0.012712	0.15	4980	tags=39%, list=12%, signal=44%
GSE17974_0H_VS_4H_IN_VITRO_ACT_CD4_TCELL_UP	191	0.486036	1.91336	0	0.0128191	0.151	4142	tags=29%, list=10%, signal=32%
GSE5679_PPARG_LIGAND_ROSIGLITAZONE_VS_RARA_AGONIST_AM580_TREATED_DC_DN	200	0.495578	1.89753	0	0.0143924	0.165	3619	tags=29%, list=9%, signal=32%
GSE2585_THYMIC_MACROPHAGE_VS_MTEC_UP	196	0.472595	1.88349	0	0.0158207	0.181	5086	tags=33%, list=13%, signal=38%
GSE13522_WT_VS_IFNAR_KO_SKING_T_CRUZI_Y_STRAIN_INF_UP	200	0.495184	1.88139	0	0.0160872	0.186	3906	tags=35%, list=10%, signal=39%
GSE15733_BM_VS_SPLEEN_MEMORY_CD4_TCELL_UP	199	0.448354	1.87422	0	0.0170721	0.195	5704	tags=35%, list=14%, signal=41%
GSE21063_CTRL_VS_ANTI_IGM_STIM_BCELL_NFATC1_KO_16H_UP	200	0.469836	1.86991	0	0.0176102	0.198	4998	tags=35%, list=12%, signal=40%
GSE10239_NAIVE_VS_MEMORY_CD8_TCELL_DN	197	0.435349	1.86366	0	0.0183396	0.202	4921	tags=29%, list=12%, signal=33%
GSE1791_CTRL_VS_NEUROMEDINU_IN_T_CELL_LINE_12H_DN	187	0.457503	1.85998	0	0.0185749	0.208	1914	tags=19%, list=5%, signal=20%
GSE2706_LPS_VS_R848_AND_LPS_2H_STIM_DC_UP	188	0.402978	1.75544	0	0.0358657	0.319	4089	tags=26%, list=10%, signal=29%
GSE22886_NAIVE_CD4_TCELL_VS_NEUTROPHIL_DN	197	0.443235	1.82565	0.00184843	0.0227913	0.244	3413	tags=25%, list=8%, signal=28%
GSE45365_NK_CELL_VS_CD11B_DC_MCMV_INFECTION_DN	200	0.506326	1.91036	0.0018622	0.0132118	0.152	3032	tags=33%, list=8%, signal=35%
GSE24142_EARLY_THYMIC_PROGENITOR_VS_DN2_THYMOCYTE_ADULT_UP	200	0.524037	1.90223	0.0018622	0.0141778	0.16	3391	tags=34%, list=8%, signal=36%
GSE43863_TFH_VS_LY6C_LOW_CXCR5NEG_EFFECTOR_CD4_TCELL_DN	199	0.488809	1.93334	0.00189036	0.0109744	0.132	4188	tags=30%, list=10%, signal=33%
GSE360_CTRL_VS_T_GONDII_DC_DN	197	0.484983	1.92912	0.00189036	0.011346	0.137	3950	tags=31%, list=10%, signal=35%
GSE24142_EARLY_THYMIC_PROGENITOR_VS_DN3_THYMOCYTE_UP	200	0.539056	1.98968	0.00189394	0.00750917	0.08	3547	tags=34%, list=9%, signal=37%
GSE21360_PRIMARY_VS_QUATERNARY_MEMORY_CD8_TCELL_UP	174	0.529397	1.94523	0.00189394	0.0101296	0.121	6567	tags=49%, list=16%, signal=58%
GSE24142_EARLY_THYMIC_PROGENITOR_VS_DN2_THYMOCYTE_DN	198	0.505783	1.97796	0.00190114	0.00817483	0.091	4367	tags=34%, list=11%, signal=38%
GSE3720_LPS_VS_PMA_STIM_VD1_GAMMADELTA_TCELL_UP	142	0.450053	1.75615	0.00190114	0.0357099	0.318	4179	tags=30%, list=10%, signal=34%
GSE43863_NAIVE_VS_TH1_EFF_CD4_TCELL_D6_LCMV_DN	187	0.373741	1.62836	0.00190476	0.0666774	0.474	5633	tags=30%, list=14%, signal=35%
GSE43863_TH1_VS_TFH_MEMORY_CD4_TCELL_DN	200	0.57434	2.04002	0.0019084	0.00468381	0.049	3578	tags=37%, list=9%, signal=40%
GSE1460_INTRATHYMIC_T_PROGENITOR_VS_CD4_THYMOCYTE_DN	199	0.610932	2.11871	0.00191205	0.00205464	0.025	2957	tags=40%, list=7%, signal=43%
GSE22589_HEALTHY_VS_HIV_INFECTED_DC_DN	200	0.515425	1.95822	0.00191205	0.00934363	0.109	5246	tags=41%, list=13%, signal=46%
GSE5455_EX_VIVO_VS_POST_24H_INCUBATION_MONOCYTES_FROM_TUMOR_BEARING_MOUSE_DN	200	0.472355	1.84903	0.00191205	0.0196302	0.215	4292	tags=32%, list=11%, signal=35%
GSE40068_CXCR5NEG_BCL6NEG_CD4_TCELL_VS_CXCR5POS_BCL6NEG_TFH_DN	199	0.481766	1.86752	0.00191571	0.0178686	0.198	3785	tags=31%, list=9%, signal=34%
GSE24142_DN2_VS_DN3_THYMOCYTE_ADULT_UP	198	0.451353	1.82635	0.00191571	0.0228358	0.244	4167	tags=30%, list=10%, signal=33%
GSE18791_CTRL_VS_NEWCASTLE_VIRUS_DC_14H_DN	191	0.524854	2.06352	0.00191939	0.00377752	0.041	5641	tags=43%, list=14%, signal=50%
GSE21063_WT_VS_NFATC1_KO_3H_ANTI_IGM_STIM_BCELL_DN	198	0.557112	2.04157	0.00191939	0.0046932	0.048	3316	tags=34%, list=8%, signal=37%
GSE45365_NK_CELL_VS_CD11B_DC_DN	199	0.593062	2.06074	0.00192308	0.00384058	0.041	4920	tags=45%, list=12%, signal=51%
GSE15735_CTRL_VS_HDAC_INHIBITOR_TREATED_CD4_TCELL_2H_DN	200	0.494518	1.94641	0.00192308	0.0101436	0.119	2979	tags=29%, list=7%, signal=31%
GSE24142_EARLY_THYMIC_PROGENITOR_VS_DN2_THYMOCYTE_FETAL_UP	200	0.574517	2.08192	0.00192678	0.00323289	0.035	3228	tags=38%, list=8%, signal=41%
GSE32164_RESTING_DIFFERENTIATED_VS_CMYC_INHIBITED_MACROPHAGE_DN	200	0.515624	1.94212	0.00192678	0.0104144	0.123	4076	tags=36%, list=10%, signal=39%
GSE26495_NAIVE_VS_PD1HIGH_CD8_TCELL_DN	199	0.579222	1.98141	0.0019305	0.00803797	0.087	2473	tags=32%, list=6%, signal=34%
GSE15330_MEGAKARYOCYTE_ERYTHROID_VS_GRANULOCYTE_MONOCYTE_PROGENITOR_UP	178	0.528108	1.97567	0.0019305	0.00816069	0.095	3457	tags=31%, list=9%, signal=34%
GSE32533_MIR17_KO_VS_MIR17_OVEREXPRESS_ACT_CD4_TCELL_UP	200	0.53159	1.96277	0.0019305	0.00896076	0.107	3920	tags=36%, list=10%, signal=40%
GSE39916_B_CELL_SPLEEN_VS_PLASMA_CELL_BONE_MARROW_DN	200	0.483472	1.92646	0.0019305	0.0115699	0.139	3569	tags=29%, list=9%, signal=32%
GSE26030_TH1_VS_TH17_DAY15_POST_POLARIZATION_DN	200	0.488041	1.90047	0.0019305	0.0142588	0.16	4200	tags=35%, list=10%, signal=39%
GSE27241_CTRL_VS_DIGOXIN_TREATED_CD4_TCELL_IN_TH17_POLARIZING_CONDITIONS_UP	162	0.525277	1.86488	0.0019305	0.0181629	0.202	3907	tags=40%, list=10%, signal=44%
GSE3565_CTRL_VS_LPS_INJECTED_SPLENOCYTES_UP	178	0.540855	1.89235	0.00193424	0.0149547	0.171	2816	tags=30%, list=7%, signal=32%
GSE5542_UNTREATED_VS_IFNA_TREATED_EPITHELIAL_CELLS_6H_UP	199	0.508145	1.87867	0.00193424	0.0163549	0.187	3665	tags=29%, list=9%, signal=32%
GSE17974_IL4_AND_ANTI_IL12_VS_UNTREATED_48H_ACT_CD4_TCELL_DN	194	0.528046	2.0026	0.00193798	0.00661357	0.07	5091	tags=41%, list=13%, signal=46%
GSE45739_UNSTIM_VS_ACD3_ACD28_STIM_WT_CD4_TCELL_DN	199	0.531989	1.97656	0.00193798	0.00819457	0.094	3456	tags=33%, list=9%, signal=36%
GSE26495_PD1HIGH_VS_PD1LOW_CD8_TCELL_UP	191	0.491548	1.91932	0.00193798	0.0121963	0.146	5240	tags=35%, list=13%, signal=40%
GSE21774_CD62L_POS_CD56_BRIGHT_VS_CD62L_NEG_CD56_DIM_NK_CELL_UP	200	0.477885	1.90209	0.00193798	0.0141384	0.16	2549	tags=28%, list=6%, signal=29%
GSE43863_DAY6_EFF_VS_DAY150_MEM_TFH_CD4_TCELL_DN	198	0.4438	1.80664	0.00193798	0.0254027	0.265	5934	tags=34%, list=15%, signal=40%
GSE22886_NEUTROPHIL_VS_DC_UP	199	0.421149	1.78467	0.00193798	0.0297617	0.29	5078	tags=31%, list=13%, signal=35%
GSE37336_LY6C_POS_VS_NEG_NAIVE_CD4_TCELL_DN	186	0.40788	1.73673	0.00193798	0.0391917	0.342	6020	tags=33%, list=15%, signal=38%
GSE24634_TEFF_VS_TCONV_DAY7_IN_CULTURE_DN	200	0.577107	2.01981	0.00194175	0.00565327	0.058	4080	tags=43%, list=10%, signal=48%
GSE360_DC_VS_MAC_M_TUBERCULOSIS_UP	196	0.511808	1.976	0.00194175	0.0081669	0.095	4110	tags=38%, list=10%, signal=42%
GSE40666_UNTREATED_VS_IFNA_STIM_STAT1_KO_CD8_TCELL_90MIN_UP	192	0.466303	1.8975	0.00194175	0.0143469	0.165	4772	tags=35%, list=12%, signal=39%
GSE9878_CTRL_VS_EBF_TRANSDUCED_PAX5_KO_PRO_BCELL_UP	200	0.474672	1.85725	0.00194175	0.0187786	0.209	5496	tags=35%, list=14%, signal=40%
GSE360_T_GONDII_VS_B_MALAYI_HIGH_DOSE_DC_UP	197	0.451971	1.82827	0.00194175	0.0226265	0.24	4188	tags=31%, list=10%, signal=34%
GSE360_CTRL_VS_L_DONOVANI_DC_DN	200	0.466297	1.90492	0.00194553	0.0139132	0.157	4015	tags=29%, list=10%, signal=32%
GSE24574_BCL6_HIGH_TFH_VS_NAIVE_CD4_TCELL_UP	198	0.444072	1.83849	0.00194553	0.0210919	0.225	3882	tags=28%, list=10%, signal=31%
GSE1740_UNSTIM_VS_IFNA_STIMULATED_MCSF_IFNG_DERIVED_MACROPHAGE_UP	193	0.478934	1.95059	0.00194932	0.00985269	0.116	5488	tags=35%, list=14%, signal=40%
GSE36888_UNTREATED_VS_IL2_TREATED_STAT5_AB_KNOCKIN_TCELL_17H_UP	189	0.47339	1.92255	0.00194932	0.0118585	0.14	4932	tags=32%, list=12%, signal=36%
GSE3982_MEMORY_CD4_TCELL_VS_BCELL_DN	197	0.523949	1.91727	0.00194932	0.01237	0.149	3335	tags=35%, list=8%, signal=37%
GSE29618_MONOCYTE_VS_MDC_DAY7_FLU_VACCINE_UP	199	0.590708	2.02642	0.00195312	0.00539947	0.055	5035	tags=45%, list=13%, signal=51%
GSE39556_UNTREATED_VS_3H_POLYIC_INJ_MOUSE_CD8A_DC_UP	199	0.528484	1.97289	0.00195312	0.00821883	0.097	2919	tags=33%, list=7%, signal=35%
GSE34156_UNTREATED_VS_6H_TLR1_TLR2_LIGAND_TREATED_MONOCYTE_UP	196	0.552417	1.96349	0.00195312	0.00892066	0.106	5714	tags=46%, list=14%, signal=54%
GSE45365_CD8A_DC_VS_CD11B_DC_IFNAR_KO_MCMV_INFECTION_DN	185	0.412142	1.75187	0.00195695	0.0363789	0.325	5562	tags=32%, list=14%, signal=37%
GSE7460_CD8_TCELL_VS_CD4_TCELL_ACT_UP	198	0.538259	1.9684	0.00196078	0.00862781	0.103	3718	tags=35%, list=9%, signal=39%
GSE22886_NAIVE_CD4_TCELL_VS_MONOCYTE_DN	200	0.58555	1.93625	0.00196078	0.0107649	0.13	5035	tags=47%, list=13%, signal=53%
GSE42021_TCONV_PLN_VS_CD24HI_TCONV_THYMUS_UP	199	0.63439	2.06992	0.00196464	0.00355699	0.039	2777	tags=41%, list=7%, signal=44%
GSE2706_UNSTIM_VS_8H_R848_DC_DN	195	0.570563	2.01392	0.00196464	0.00593344	0.06	4210	tags=39%, list=10%, signal=44%
GSE3039_CD4_TCELL_VS_ALPHABETA_CD8_TCELL_UP	200	0.490364	1.93088	0.00196464	0.0111817	0.136	4667	tags=36%, list=12%, signal=40%
GSE5589_LPS_AND_IL10_VS_LPS_AND_IL6_STIM_IL6_KO_MACROPHAGE_45MIN_UP	200	0.614417	2.024	0.0019685	0.00549167	0.056	3798	tags=45%, list=9%, signal=49%
GSE17721_0.5H_VS_24H_CPG_BMDC_UP	200	0.500787	1.94625	0.0019685	0.0100633	0.119	3404	tags=29%, list=8%, signal=31%
GSE7596_AKT_TRANSD_VS_CTRL_CD4_TCONV_WITH_TGFB_DN	128	0.401469	1.66501	0.0019685	0.0568972	0.435	6034	tags=38%, list=15%, signal=44%
GSE21360_NAIVE_VS_SECONDARY_MEMORY_CD8_TCELL_UP	182	0.545533	1.98569	0.00197239	0.00773121	0.082	4163	tags=36%, list=10%, signal=40%
GSE42021_TREG_VS_TCONV_PLN_UP	200	0.709326	2.12171	0.00198413	0.00200298	0.025	5354	tags=62%, list=13%, signal=71%
GSE23568_ID3_TRANSDUCED_VS_ID3_KO_CD8_TCELL_UP	200	0.552567	2.04053	0.00198413	0.0046947	0.049	4771	tags=40%, list=12%, signal=45%
GSE34205_RSV_VS_FLU_INF_INFANT_PBMC_DN	195	0.58007	2.03789	0.00198413	0.0048023	0.051	3670	tags=42%, list=9%, signal=45%
GSE32164_ALTERNATIVELY_ACT_M2_VS_CMYC_INHIBITED_MACROPHAGE_UP	200	0.562573	2.00963	0.00198413	0.00617604	0.062	3695	tags=40%, list=9%, signal=43%
GSE46606_IRF4HIGH_VS_WT_CD40L_IL2_IL5_DAY3_STIMULATED_BCELL_DN	199	0.485708	1.96565	0.00198413	0.00880227	0.103	4945	tags=36%, list=12%, signal=40%
GSE17974_0H_VS_1H_IN_VITRO_ACT_CD4_TCELL_UP	190	0.490337	1.92011	0.00199203	0.0121338	0.145	5447	tags=39%, list=14%, signal=45%
GSE37533_PPARG2_FOXP3_VS_FOXP3_TRANSDUCED_CD4_TCELL_DN	198	0.673825	2.02929	0.002	0.00528791	0.053	5354	tags=55%, list=13%, signal=63%
GSE37533_PPARG1_FOXP3_VS_FOXP3_TRANSDUCED_CD4_TCELL_DN	200	0.6967	2.0198	0.00200401	0.00561772	0.058	3391	tags=50%, list=8%, signal=54%
GSE26343_UNSTIM_VS_LPS_STIM_NFAT5_KO_MACROPHAGE_DN	199	0.583922	1.98113	0.00200401	0.00804375	0.087	2877	tags=40%, list=7%, signal=43%
GSE360_L_DONOVANI_VS_B_MALAYI_HIGH_DOSE_MAC_DN	200	0.508735	1.89777	0.00200401	0.0144069	0.165	5042	tags=37%, list=13%, signal=42%
GSE22140_GERMFREE_VS_SPF_ARTHRITIC_MOUSE_CD4_TCELL_DN	199	0.59963	2.09948	0.00201613	0.00260178	0.032	3332	tags=42%, list=8%, signal=45%
GSE21546_UNSTIM_VS_ANTI_CD3_STIM_ELK1_KO_DP_THYMOCYTES_UP	189	0.612808	2.16864	0.0020202	0.000906959	0.014	5394	tags=44%, list=13%, signal=50%
GSE13484_UNSTIM_VS_YF17D_VACCINE_STIM_PBMC_DN	200	0.652992	2.05124	0.00202429	0.00425067	0.047	5371	tags=54%, list=13%, signal=61%
GSE6090_UNSTIM_VS_DC_SIGN_STIM_DC_DN	146	0.511504	2.03186	0.00209644	0.00514957	0.053	5644	tags=40%, list=14%, signal=47%
GSE40274_CTRL_VS_FOXP3_AND_XBP1_TRANSDUCED_ACTIVATED_CD4_TCELL_DN	157	0.505925	1.97955	0.00375235	0.0081147	0.09	5341	tags=38%, list=13%, signal=44%
GSE12845_IGD_NEG_BLOOD_VS_DARKZONE_GC_TONSIL_BCELL_UP	197	0.471218	1.83082	0.0037594	0.0221588	0.236	4017	tags=32%, list=10%, signal=35%
GSE40274_CTRL_VS_LEF1_TRANSDUCED_ACTIVATED_CD4_TCELL_UP	172	0.512502	1.9498	0.00377358	0.00990296	0.116	4665	tags=36%, list=12%, signal=41%
GSE13522_CTRL_VS_T_CRUZI_Y_STRAIN_INF_SKIN_IFNAR_KO_UP	199	0.487969	1.85142	0.00378072	0.0193853	0.213	4657	tags=33%, list=12%, signal=37%
GSE27241_CTRL_VS_DIGOXIN_TREATED_CD4_TCELL_IN_TH17_POLARIZING_CONDITIONS_DN	195	0.49854	1.90013	0.00378788	0.0142612	0.16	3946	tags=38%, list=10%, signal=42%
GSE46242_CTRL_VS_EGR2_DELETED_ANERGIC_TH1_CD4_TCELL_DN	196	0.532983	2.02645	0.00380952	0.00542776	0.055	3928	tags=38%, list=10%, signal=42%
GSE41867_NAIVE_VS_DAY6_LCMV_ARMSTRONG_EFFECTOR_CD8_TCELL_DN	200	0.498523	1.8684	0.00380952	0.0177744	0.198	3441	tags=31%, list=9%, signal=34%
GSE40274_CTRL_VS_FOXP3_AND_GATA1_TRANSDUCED_ACTIVATED_CD4_TCELL_UP	140	0.51619	1.94315	0.00381679	0.0103307	0.123	2290	tags=26%, list=6%, signal=28%
GSE40274_HELIOS_VS_FOXP3_AND_HELIOS_TRANSDUCED_ACTIVATED_CD4_TCELL_UP	199	0.475496	1.86129	0.00381679	0.0184591	0.204	4811	tags=35%, list=12%, signal=39%
GSE20715_0H_VS_24H_OZONE_TLR4_KO_LUNG_UP	199	0.46901	1.88705	0.00382409	0.0155822	0.177	4385	tags=32%, list=11%, signal=36%
GSE37301_CD4_TCELL_VS_GRANULOCYTE_MONOCYTE_PROGENITOR_DN	179	0.493905	1.809	0.00382409	0.0250892	0.262	4732	tags=38%, list=12%, signal=43%
GSE40274_CTRL_VS_XBP1_TRANSDUCED_ACTIVATED_CD4_TCELL_UP	170	0.535245	1.96349	0.00383142	0.00896461	0.106	4998	tags=40%, list=12%, signal=45%
GSE3039_B2_VS_B1_BCELL_UP	199	0.489767	1.83781	0.00383142	0.0211606	0.227	3953	tags=34%, list=10%, signal=37%
GSE11057_CD4_EFF_MEM_VS_PBMC_DN	194	0.549556	1.94653	0.00383877	0.0101635	0.119	4264	tags=38%, list=11%, signal=42%
GSE12392_WT_VS_IFNAR_KO_CD8A_NEG_SPLEEN_DC_UP	200	0.517526	1.89135	0.00383877	0.0150625	0.171	4545	tags=38%, list=11%, signal=43%
GSE29618_BCELL_VS_MDC_DAY7_FLU_VACCINE_DN	200	0.544981	1.94027	0.00384615	0.0104949	0.125	3547	tags=37%, list=9%, signal=40%
GSE21380_NON_TFH_VS_TFH_CD4_TCELL_UP	200	0.517624	1.90135	0.00384615	0.0141882	0.16	3851	tags=33%, list=10%, signal=36%
GSE21063_WT_VS_NFATC1_KO_BCELL_UP	200	0.433234	1.81643	0.00384615	0.0240717	0.257	6059	tags=37%, list=15%, signal=43%
GSE360_T_GONDII_VS_B_MALAYI_HIGH_DOSE_MAC_DN	198	0.523279	1.97679	0.00385356	0.00826905	0.094	3928	tags=34%, list=10%, signal=37%
GSE16450_IMMATURE_VS_MATURE_NEURON_CELL_LINE_12H_IFNA_STIM_UP	200	0.517549	1.86095	0.00385356	0.0184678	0.205	5242	tags=42%, list=13%, signal=47%
GSE22886_NAIVE_VS_IGM_MEMORY_BCELL_DN	197	0.506532	1.90377	0.003861	0.0140567	0.159	2558	tags=28%, list=6%, signal=30%
GSE557_CIITA_KO_VS_I_AB_KO_DC_UP	200	0.503958	1.89711	0.003861	0.0143497	0.166	3758	tags=31%, list=9%, signal=33%
GSE3982_MAST_CELL_VS_EFF_MEMORY_CD4_TCELL_DN	193	0.436026	1.75639	0.003861	0.0357905	0.318	5221	tags=33%, list=13%, signal=37%
GSE22886_NAIVE_TCELL_VS_MONOCYTE_DN	200	0.586162	1.94708	0.00386847	0.0101825	0.119	5051	tags=46%, list=13%, signal=52%
GSE9650_NAIVE_VS_EFF_CD8_TCELL_DN	197	0.487239	1.85673	0.00387597	0.0188179	0.209	2578	tags=24%, list=6%, signal=26%
GSE22886_NAIVE_CD8_TCELL_VS_NEUTROPHIL_DN	196	0.459913	1.8225	0.00387597	0.0231004	0.249	5035	tags=34%, list=13%, signal=38%
GSE22886_TCELL_VS_BCELL_NAIVE_UP	199	0.558589	2.0001	0.0038835	0.00675434	0.071	3006	tags=36%, list=7%, signal=38%
GSE22886_NAIVE_CD4_TCELL_VS_MONOCYTE_UP	197	0.542006	1.92464	0.0038835	0.0117602	0.14	4052	tags=39%, list=10%, signal=43%
GSE13484_3H_UNSTIM_VS_YF17D_VACCINE_STIM_PBMC_DN	197	0.53474	1.89696	0.0038835	0.0143361	0.166	3971	tags=36%, list=10%, signal=40%
GSE43863_TH1_VS_LY6C_INT_CXCR5POS_MEMORY_CD4_TCELL_DN	200	0.444284	1.87081	0.0038835	0.0174903	0.197	5429	tags=34%, list=13%, signal=39%
GSE6674_UNSTIM_VS_CPG_STIM_BCELL_UP	147	0.48371	1.84831	0.0038835	0.0196646	0.217	4281	tags=31%, list=11%, signal=35%
GSE22886_NAIVE_CD8_TCELL_VS_MONOCYTE_UP	199	0.562763	1.97308	0.00389105	0.00824263	0.097	2778	tags=34%, list=7%, signal=37%
GSE3720_LPS_VS_PMA_STIM_VD1_GAMMADELTA_TCELL_DN	172	0.476668	1.84964	0.00389864	0.0196471	0.215	4557	tags=34%, list=11%, signal=38%
GSE11864_UNTREATED_VS_CSF1_IN_MAC_UP	196	0.437047	1.71849	0.00389864	0.0436486	0.37	3328	tags=29%, list=8%, signal=32%
GSE22886_CTRL_VS_LPS_24H_DC_DN	199	0.617929	2.03761	0.00390625	0.00479013	0.052	4327	tags=48%, list=11%, signal=53%
GSE25123_IL4_VS_IL4_AND_ROSIGLITAZONE_STIM_MACROPHAGE_DAY10_UP	200	0.476573	1.81375	0.00391389	0.0242469	0.259	4490	tags=33%, list=11%, signal=37%
GSE34156_NOD2_LIGAND_VS_TLR1_TLR2_LIGAND_6H_TREATED_MONOCYTE_UP	200	0.544095	1.94206	0.00392157	0.0103715	0.123	4055	tags=43%, list=10%, signal=47%
GSE34392_ST2_KO_VS_WT_DAY8_LCMV_EFFECTOR_CD8_TCELL_DN	200	0.53285	1.8978	0.00392157	0.01446	0.165	4207	tags=40%, list=10%, signal=44%
GSE10325_CD4_TCELL_VS_MYELOID_UP	199	0.534296	1.8908	0.00392157	0.0150863	0.172	2427	tags=29%, list=6%, signal=31%
GSE15930_STIM_VS_STIM_AND_IL12_48H_CD8_T_CELL_UP	200	0.499259	1.86135	0.00392157	0.018511	0.203	4236	tags=35%, list=11%, signal=38%
GSE16266_LPS_VS_HEATSHOCK_AND_LPS_STIM_MEF_UP	199	0.52744	2.00003	0.00392927	0.00672907	0.072	2919	tags=32%, list=7%, signal=34%
GSE40666_UNTREATED_VS_IFNA_STIM_EFFECTOR_CD8_TCELL_90MIN_UP	200	0.478156	1.88361	0.00393701	0.0158655	0.18	3859	tags=33%, list=10%, signal=36%
GSE360_HIGH_DOSE_B_MALAYI_VS_M_TUBERCULOSIS_DC_DN	200	0.522558	1.95539	0.00395257	0.00951153	0.113	4188	tags=38%, list=10%, signal=42%
GSE17974_IL4_AND_ANTI_IL12_VS_UNTREATED_72H_ACT_CD4_TCELL_DN	195	0.536085	1.85792	0.00395257	0.0187647	0.208	3980	tags=35%, list=10%, signal=39%
GSE3982_MAC_VS_NEUTROPHIL_DN	195	0.442815	1.74956	0.0039604	0.0367155	0.328	3457	tags=27%, list=9%, signal=29%
GSE42021_TREG_PLN_VS_TREG_PRECURSORS_THYMUS_DN	200	0.666383	2.04092	0.00396825	0.00469857	0.049	3537	tags=51%, list=9%, signal=56%
GSE42021_TREG_PLN_VS_CD24LO_TREG_THYMUS_DN	197	0.59954	2.02399	0.00396825	0.00545601	0.056	4912	tags=45%, list=12%, signal=51%
GSE24574_BCL6_HIGH_VS_LOW_TFH_CD4_TCELL_UP	199	0.49613	1.88568	0.00396825	0.0157014	0.177	4770	tags=38%, list=12%, signal=43%
GSE32423_MEMORY_VS_NAIVE_CD8_TCELL_UP	199	0.445401	1.86278	0.00396825	0.0184426	0.203	5066	tags=32%, list=13%, signal=36%
GSE19888_ADENOSINE_A3R_INH_VS_ACT_WITH_INHIBITOR_PRETREATMENT_IN_MAST_CELL_UP	200	0.621655	2.07846	0.00397614	0.00329439	0.035	4351	tags=45%, list=11%, signal=50%
GSE5099_CLASSICAL_M1_VS_ALTERNATIVE_M2_MACROPHAGE_UP	194	0.51718	1.94343	0.00397614	0.0103472	0.123	3810	tags=34%, list=9%, signal=37%
GSE21063_CTRL_VS_ANTI_IGM_STIM_BCELL_8H_UP	153	0.491517	1.82258	0.00397614	0.0231387	0.249	4449	tags=35%, list=11%, signal=39%
GSE45739_UNSTIM_VS_ACD3_ACD28_STIM_NRAS_KO_CD4_TCELL_DN	194	0.583635	2.12926	0.004	0.00185976	0.024	3399	tags=36%, list=8%, signal=39%
GSE18791_UNSTIM_VS_NEWCATSLE_VIRUS_DC_18H_DN	192	0.532774	1.9516	0.004	0.00992642	0.116	6406	tags=45%, list=16%, signal=53%
GSE25123_WT_VS_PPARG_KO_MACROPHAGE_UP	198	0.515232	1.86188	0.004	0.0185431	0.203	5670	tags=41%, list=14%, signal=47%
GSE22886_NAIVE_TCELL_VS_DC_UP	199	0.555198	1.98409	0.00400802	0.00781884	0.085	3843	tags=40%, list=10%, signal=44%
GSE10422_WT_VS_BAFF_TRANSGENIC_LN_BCELL_DN	129	0.390145	1.65989	0.00403226	0.0576308	0.443	4142	tags=24%, list=10%, signal=27%
GSE40685_TREG_VS_FOXP3_KO_TREG_PRECURSOR_UP	199	0.631123	2.03063	0.00407332	0.00521058	0.053	3962	tags=45%, list=10%, signal=50%
GSE19401_UNSTIM_VS_RETINOIC_ACID_STIM_FOLLICULAR_DC_UP	198	0.497576	1.85883	0.00417537	0.0187053	0.208	3955	tags=32%, list=10%, signal=35%
GSE43863_NAIVE_VS_MEMORY_TFH_CD4_TCELL_D150_LCMV_UP	200	0.544212	1.97085	0.00555556	0.00839143	0.099	4828	tags=40%, list=12%, signal=45%
GSE43863_DAY6_EFF_VS_DAY150_MEM_TH1_CD4_TCELL_UP	200	0.5201	1.92285	0.00562852	0.0118699	0.14	2348	tags=29%, list=6%, signal=31%
GSE23114_PERITONEAL_CAVITY_B1A_BCELL_VS_SPLEEN_BCELL_UP	190	0.376947	1.64119	0.00564972	0.0629693	0.457	3227	tags=21%, list=8%, signal=23%
GSE30962_ACUTE_VS_CHRONIC_LCMV_PRIMARY_INF_CD8_TCELL_UP	199	0.499253	1.82636	0.00567108	0.0229	0.244	3718	tags=31%, list=9%, signal=34%
GSE33292_DN3_THYMOCYTE_VS_TCF1_KO_TCELL_LYMPHOMA_UP	199	0.460323	1.80499	0.00568182	0.025709	0.266	3296	tags=29%, list=8%, signal=32%
GSE13522_WT_VS_IFNAR_KO_SKIN_DN	177	0.468046	1.79735	0.00568182	0.0271775	0.274	2556	tags=27%, list=6%, signal=28%
GSE36095_WT_VS_HDAC9_KO_TREG_DN	123	0.40471	1.71498	0.00570342	0.0445988	0.375	5131	tags=33%, list=13%, signal=37%
GSE40666_NAIVE_VS_EFFECTOR_CD8_TCELL_DN	199	0.467378	1.85445	0.00571429	0.0190038	0.21	4354	tags=32%, list=11%, signal=35%
GSE22886_DAY1_VS_DAY7_MONOCYTE_IN_CULTURE_UP	197	0.514825	1.84455	0.00571429	0.0203149	0.22	5268	tags=41%, list=13%, signal=47%
GSE2128_CTRL_VS_MIMETOPE_NEGATIVE_SELECTION_DP_THYMOCYTE_C57BL6_UP	188	0.43476	1.79187	0.00571429	0.0282426	0.283	5429	tags=38%, list=13%, signal=44%
GSE32986_UNSTIM_VS_CURDLAN_HIGHDOSE_STIM_DC_DN	200	0.527964	1.87539	0.00572519	0.0168817	0.193	3121	tags=31%, list=8%, signal=33%
GSE5455_HEALTHY_VS_TUMOR_BEARING_MOUSE_SPLEEN_MONOCYTE_DN	199	0.459096	1.81876	0.00572519	0.0236584	0.256	3100	tags=26%, list=8%, signal=28%
GSE5589_WT_VS_IL10_KO_LPS_STIM_MACROPHAGE_180MIN_DN	155	0.417058	1.74868	0.00572519	0.0368222	0.329	6590	tags=40%, list=16%, signal=48%
GSE22025_UNTREATED_VS_PROGESTERONE_TREATED_CD4_TCELL_UP	197	0.414956	1.70641	0.00572519	0.0468268	0.381	3782	tags=27%, list=9%, signal=30%
GSE3982_CENT_MEMORY_CD4_TCELL_VS_NKCELL_DN	196	0.477243	1.85543	0.00573614	0.0188803	0.209	4015	tags=33%, list=10%, signal=37%
GSE9316_IL6_KO_VS_IFNG_KO_INVIVO_EXPANDED_CD4_TCELL_DN	200	0.552639	1.96249	0.00574713	0.00894621	0.107	4149	tags=44%, list=10%, signal=48%
GSE40666_NAIVE_VS_EFFECTOR_CD8_TCELL_WITH_IFNA_STIM_90MIN_UP	200	0.455928	1.79751	0.00574713	0.0272061	0.273	3257	tags=29%, list=8%, signal=31%
GSE13946_CTRL_VS_DSS_COLITIS_GD_TCELL_FROM_COLON_UP	178	0.464966	1.83036	0.00575816	0.0222036	0.238	3654	tags=26%, list=9%, signal=28%
GSE40274_CTRL_VS_SATB1_TRANSDUCED_ACTIVATED_CD4_TCELL_UP	168	0.485329	1.83892	0.00578035	0.0211355	0.225	4501	tags=36%, list=11%, signal=40%
GSE7509_DC_VS_MONOCYTE_DN	199	0.482892	1.81879	0.00578035	0.0237206	0.256	3595	tags=33%, list=9%, signal=36%
GSE22140_HEALTHY_VS_ARTHRITIC_GERMFREE_MOUSE_CD4_TCELL_UP	200	0.524498	1.91829	0.00579151	0.012305	0.146	3947	tags=38%, list=10%, signal=41%
GSE5542_IFNG_VS_IFNA_TREATED_EPITHELIAL_CELLS_24H_DN	200	0.43231	1.80351	0.00579151	0.0259646	0.266	4236	tags=26%, list=11%, signal=29%
GSE3039_CD4_TCELL_VS_B2_BCELL_UP	200	0.46529	1.82402	0.00581395	0.0230051	0.246	4964	tags=36%, list=12%, signal=40%
GSE24142_DN2_VS_DN3_THYMOCYTE_UP	200	0.483921	1.8982	0.00582524	0.0144623	0.165	3595	tags=29%, list=9%, signal=32%
GSE7219_UNSTIM_VS_LPS_AND_ANTI_CD40_STIM_NIK_NFKB2_KO_DC_UP	178	0.532329	1.85192	0.00582524	0.0193503	0.213	3714	tags=37%, list=9%, signal=41%
GSE23925_LIGHT_ZONE_VS_NAIVE_BCELL_UP	199	0.507668	1.85806	0.00583658	0.0188036	0.208	4188	tags=37%, list=10%, signal=41%
GSE360_L_DONOVANI_VS_B_MALAYI_LOW_DOSE_DC_UP	198	0.463735	1.81308	0.00583658	0.0243593	0.259	4787	tags=35%, list=12%, signal=39%
GSE14000_UNSTIM_VS_4H_LPS_DC_TRANSLATED_RNA_DN	195	0.588712	1.97675	0.00585938	0.00822843	0.094	5339	tags=49%, list=13%, signal=56%
GSE21379_WT_VS_SAP_KO_TFH_CD4_TCELL_UP	199	0.491626	1.8825	0.00587084	0.0159437	0.183	4449	tags=33%, list=11%, signal=37%
GSE20715_0H_VS_48H_OZONE_LUNG_UP	200	0.509005	1.88107	0.00587084	0.0160386	0.186	5366	tags=41%, list=13%, signal=47%
GSE11961_UNSTIM_VS_ANTI_IGM_AND_CD40_STIM_6H_FOLLICULAR_BCELL_DN	199	0.457259	1.7791	0.00587084	0.0308405	0.296	4075	tags=31%, list=10%, signal=34%
GSE6259_FLT3L_INDUCED_DEC205_POS_DC_VS_CD8_TCELL_DN	173	0.608546	2.03307	0.00588235	0.00508967	0.053	4353	tags=47%, list=11%, signal=52%
GSE40274_FOXP3_VS_FOXP3_AND_LEF1_TRANSDUCED_ACTIVATED_CD4_TCELL_UP	200	0.463924	1.81512	0.00588235	0.0241285	0.259	4651	tags=34%, list=12%, signal=38%
GSE18791_CTRL_VS_NEWCASTLE_VIRUS_DC_16H_DN	194	0.545272	1.9464	0.00589391	0.0100979	0.119	4327	tags=38%, list=11%, signal=43%
GSE10239_MEMORY_VS_DAY4.5_EFF_CD8_TCELL_UP	199	0.488853	1.90926	0.00589391	0.0133258	0.153	4940	tags=38%, list=12%, signal=43%
GSE24142_EARLY_THYMIC_PROGENITOR_VS_DN2_THYMOCYTE_FETAL_DN	200	0.442838	1.8288	0.00590551	0.0225699	0.24	3430	tags=24%, list=9%, signal=26%
GSE3982_NKCELL_VS_TH2_UP	197	0.45804	1.78409	0.00590551	0.0298496	0.29	5023	tags=31%, list=12%, signal=36%
GSE14415_INDUCED_TREG_VS_FAILED_INDUCED_TREG_DN	178	0.501415	1.79049	0.00591716	0.0285195	0.284	1760	tags=26%, list=4%, signal=27%
GSE29618_BCELL_VS_PDC_UP	196	0.578663	1.94657	0.00592885	0.0102044	0.119	4605	tags=46%, list=11%, signal=52%
GSE17974_IL4_AND_ANTI_IL12_VS_UNTREATED_24H_ACT_CD4_TCELL_UP	185	0.38666	1.70268	0.00592885	0.0476917	0.387	4145	tags=24%, list=10%, signal=27%
GSE22886_NAIVE_CD8_TCELL_VS_DC_UP	199	0.539122	1.95112	0.00595238	0.00991683	0.116	4004	tags=37%, list=10%, signal=41%
GSE41867_NAIVE_VS_DAY30_LCMV_CLONE13_EXHAUSTED_CD8_TCELL_UP	190	0.540211	1.93319	0.00595238	0.0109533	0.132	4980	tags=40%, list=12%, signal=45%
GSE17721_PAM3CSK4_VS_GADIQUIMOD_1H_BMDC_UP	200	0.441636	1.76779	0.0059761	0.0331791	0.303	5405	tags=33%, list=13%, signal=38%
GSE28726_NAIVE_CD4_TCELL_VS_NAIVE_VA24NEG_NKTCELL_DN	198	0.459674	1.87282	0.00598802	0.0172076	0.196	6533	tags=41%, list=16%, signal=49%
GSE42088_UNINF_VS_LEISHMANIA_INF_DC_4H_DN	199	0.556725	2.0354	0.006	0.00491475	0.053	6030	tags=45%, list=15%, signal=53%
GSE3982_MAST_CELL_VS_NEUTROPHIL_DN	197	0.494961	1.83395	0.006	0.0216837	0.23	3415	tags=30%, list=8%, signal=33%
GSE21774_CD62L_POS_CD56_DIM_VS_CD62L_NEG_CD56_DIM_NK_CELL_DN	199	0.420918	1.75184	0.00601202	0.0363102	0.325	3651	tags=26%, list=9%, signal=29%
GSE17974_CTRL_VS_ACT_IL4_AND_ANTI_IL12_0.5H_CD4_TCELL_UP	189	0.415751	1.7808	0.0060241	0.0305435	0.293	6197	tags=33%, list=15%, signal=39%
GSE37533_PPARG1_FOXP3_VS_PPARG2_FOXP3_TRANSDUCED_CD4_TCELL_PIOGLITAZONE_TREATED_DN	199	0.638206	1.93839	0.00604839	0.0105727	0.128	5023	tags=51%, list=12%, signal=58%
GSE17974_0H_VS_0.5H_IN_VITRO_ACT_CD4_TCELL_UP	194	0.444917	1.79337	0.00604839	0.0280153	0.279	4614	tags=31%, list=11%, signal=35%
GSE10147_IL3_VS_IL3_AND_CPG_STIM_PDC_UP	146	0.434928	1.76345	0.00604839	0.034334	0.312	4005	tags=25%, list=10%, signal=27%
GSE36888_STAT5_AB_KNOCKIN_VS_WT_TCELL_IL2_TREATED_2H_UP	197	0.49783	1.8927	0.00743494	0.0149627	0.171	5254	tags=39%, list=13%, signal=44%
GSE27241_CTRL_VS_DIGOXIN_TREATED_RORGT_KO_CD4_TCELL_IN_TH17_POLARIZING_CONDITIONS_DN	185	0.463536	1.74403	0.00746269	0.0376838	0.335	4005	tags=32%, list=10%, signal=35%
GSE9988_ANTI_TREM1_VS_VEHICLE_TREATED_MONOCYTES_DN	197	0.561511	1.88496	0.0075188	0.0157592	0.178	3947	tags=43%, list=10%, signal=47%
GSE17974_IL4_AND_ANTI_IL12_VS_UNTREATED_2H_ACT_CD4_TCELL_UP	195	0.41295	1.68878	0.0075188	0.0518133	0.404	4102	tags=27%, list=10%, signal=30%
GSE15624_CTRL_VS_6H_HALOFUGINONE_TREATED_CD4_TCELL_UP	133	0.435972	1.72358	0.00757576	0.0423108	0.361	3091	tags=23%, list=8%, signal=25%
GSE45382_UNTREATED_VS_TGFB_TREATED_MACROPHAGES_UP	198	0.495031	1.81145	0.00759013	0.0246713	0.261	3867	tags=32%, list=10%, signal=36%
GSE40274_FOXP3_VS_FOXP3_AND_IRF4_TRANSDUCED_ACTIVATED_CD4_TCELL_UP	200	0.466448	1.82338	0.00760456	0.0230142	0.248	5308	tags=37%, list=13%, signal=42%
GSE24142_DN2_VS_DN3_THYMOCYTE_FETAL_DN	198	0.457452	1.82435	0.00761905	0.0229845	0.246	3645	tags=31%, list=9%, signal=34%
GSE3982_CTRL_VS_LPS_48H_DC_DN	200	0.523691	1.92457	0.00763359	0.0117199	0.14	5250	tags=44%, list=13%, signal=50%
GSE16522_MEMORY_VS_NAIVE_ANTI_CD3CD28_STIM_CD8_TCELL_DN	200	0.50611	1.91827	0.00763359	0.0122587	0.146	2866	tags=29%, list=7%, signal=31%
GSE32164_RESTING_DIFFERENTIATED_VS_ALTERNATIVELY_ACT_M2_MACROPHAGE_DN	200	0.514687	1.81556	0.00763359	0.0241208	0.258	4101	tags=41%, list=10%, signal=45%
GSE3039_CD4_TCELL_VS_B1_BCELL_DN	199	0.454785	1.83304	0.00764818	0.0217811	0.231	4807	tags=35%, list=12%, signal=39%
GSE19923_WT_VS_HEB_KO_DP_THYMOCYTE_UP	200	0.424649	1.75846	0.00764818	0.0354782	0.317	3525	tags=28%, list=9%, signal=30%
GSE19825_CD24LOW_VS_IL2RA_HIGH_DAY3_EFF_CD8_TCELL_UP	198	0.500669	1.83752	0.00766283	0.0211929	0.227	4049	tags=37%, list=10%, signal=41%
GSE17974_0H_VS_24H_IN_VITRO_ACT_CD4_TCELL_UP	190	0.500094	1.88122	0.00767754	0.0160588	0.186	2889	tags=31%, list=7%, signal=33%
GSE23568_ID3_KO_VS_WT_CD8_TCELL_DN	200	0.516715	1.84936	0.00772201	0.0196446	0.215	4353	tags=41%, list=11%, signal=45%
GSE25085_FETAL_LIVER_VS_FETAL_BM_SP4_THYMIC_IMPLANT_DN	200	0.459009	1.75039	0.00772201	0.0365481	0.328	4354	tags=32%, list=11%, signal=35%
GSE360_L_MAJOR_VS_T_GONDII_MAC_UP	196	0.40483	1.62614	0.00772201	0.067511	0.478	4192	tags=29%, list=10%, signal=32%
GSE2405_0H_VS_3H_A_PHAGOCYTOPHILUM_STIM_NEUTROPHIL_UP	199	0.4861	1.81616	0.00773694	0.0240857	0.257	4163	tags=31%, list=10%, signal=34%
GSE7219_UNSTIM_VS_LPS_AND_ANTI_CD40_STIM_DC_DN	174	0.480754	1.80967	0.00773694	0.0250035	0.262	3091	tags=29%, list=8%, signal=32%
GSE360_L_DONOVANI_VS_B_MALAYI_HIGH_DOSE_DC_UP	199	0.454759	1.77851	0.00773694	0.0308521	0.297	4096	tags=33%, list=10%, signal=36%
GSE25123_WT_VS_PPARG_KO_MACROPHAGE_ROSIGLITAZONE_STIM_DN	185	0.401294	1.70243	0.00773694	0.0476201	0.387	6111	tags=35%, list=15%, signal=41%
GSE29164_DAY3_VS_DAY7_CD8_TCELL_AND_IL12_TREATED_MELANOMA_DN	199	0.383342	1.63803	0.00773694	0.0637122	0.459	4825	tags=27%, list=12%, signal=30%
GSE8835_CD4_VS_CD8_TCELL_CLL_PATIENT_UP	200	0.534735	1.94003	0.00775194	0.0104632	0.125	4327	tags=40%, list=11%, signal=44%
GSE22886_UNSTIM_VS_STIM_MEMORY_TCELL_UP	197	0.478583	1.82543	0.00775194	0.0227838	0.244	3843	tags=30%, list=10%, signal=34%
GSE2770_IL4_ACT_VS_ACT_CD4_TCELL_6H_UP	198	0.466725	1.80167	0.00775194	0.0263192	0.267	5231	tags=35%, list=13%, signal=40%
GSE9988_ANTI_TREM1_VS_LOW_LPS_MONOCYTE_DN	197	0.554056	1.89522	0.0077821	0.0145944	0.168	5564	tags=45%, list=14%, signal=52%
GSE11057_NAIVE_VS_EFF_MEMORY_CD4_TCELL_DN	197	0.521217	1.84382	0.0077821	0.0203488	0.22	3064	tags=31%, list=8%, signal=34%
GSE21360_SECONDARY_VS_QUATERNARY_MEMORY_CD8_TCELL_UP	181	0.567232	1.93482	0.00779727	0.010889	0.13	5455	tags=44%, list=14%, signal=51%
GSE39864_WT_VS_GATA3_KO_TREG_UP	199	0.471213	1.82784	0.00779727	0.0226588	0.241	3808	tags=29%, list=9%, signal=32%
GSE29618_MONOCYTE_VS_MDC_DAY7_FLU_VACCINE_DN	200	0.447826	1.79706	0.00779727	0.0272086	0.274	4906	tags=33%, list=12%, signal=37%
GSE8921_UNSTIM_VS_TLR1_2_STIM_MONOCYTE_24H_UP	198	0.456514	1.71924	0.0078125	0.0435519	0.369	3928	tags=35%, list=10%, signal=39%
GSE19941_UNSTIM_VS_LPS_AND_IL10_STIM_IL10_KO_NFKBP50_KO_MACROPHAGE_UP	174	0.381668	1.61904	0.00785855	0.0695151	0.487	4075	tags=26%, list=10%, signal=29%
GSE21546_UNSTIM_VS_ANTI_CD3_STIM_SAP1A_KO_AND_ELK1_KO_DP_THYMOCYTES_UP	189	0.486743	1.8894	0.00787402	0.0152782	0.174	5250	tags=37%, list=13%, signal=42%
GSE40274_CTRL_VS_FOXP3_AND_PBX1_TRANSDUCED_ACTIVATED_CD4_TCELL_UP	165	0.466338	1.73067	0.00788955	0.0407924	0.352	3680	tags=27%, list=9%, signal=29%
GSE18791_CTRL_VS_NEWCASTLE_VIRUS_DC_18H_DN	193	0.500245	1.831	0.00792079	0.0221776	0.235	6412	tags=45%, list=16%, signal=53%
GSE360_CTRL_VS_M_TUBERCULOSIS_DC_DN	200	0.49504	1.85569	0.00793651	0.0188908	0.209	4188	tags=34%, list=10%, signal=37%
GSE42088_UNINF_VS_LEISHMANIA_INF_DC_24H_UP	200	0.544039	1.85011	0.00793651	0.0196077	0.215	4656	tags=45%, list=12%, signal=51%
GSE7831_UNSTIM_VS_INFLUENZA_STIM_PDC_4H_UP	200	0.456318	1.7341	0.00795229	0.0399759	0.348	5367	tags=37%, list=13%, signal=42%
GSE19941_UNSTIM_VS_LPS_AND_IL10_STIM_IL10_KO_MACROPHAGE_UP	198	0.45055	1.76129	0.00798403	0.0348412	0.314	4424	tags=30%, list=11%, signal=34%
GSE21546_UNSTIM_VS_ANTI_CD3_STIM_SAP1A_KO_AND_ELK1_KO_DP_THYMOCYTES_DN	185	0.336519	1.42549	0.008	0.138416	0.697	5997	tags=28%, list=15%, signal=33%
GSE13411_PLASMA_CELL_VS_MEMORY_BCELL_DN	197	0.527638	1.80695	0.00801603	0.0253994	0.265	4359	tags=39%, list=11%, signal=43%
GSE13485_CTRL_VS_DAY7_YF17D_VACCINE_PBMC_DN	200	0.663499	1.95074	0.00806452	0.00989596	0.116	5354	tags=59%, list=13%, signal=68%
GSE2706_2H_VS_8H_LPS_STIM_DC_DN	191	0.518828	1.84375	0.00806452	0.0202939	0.22	6515	tags=45%, list=16%, signal=53%
GSE42724_NAIVE_BCELL_VS_PLASMABLAST_UP	197	0.650519	1.93921	0.00811359	0.0105131	0.125	5354	tags=53%, list=13%, signal=61%
GSE7548_DAY7_VS_DAY28_PCC_IMMUNIZATION_CD4_TCELL_DN	199	0.47234	1.83869	0.00821355	0.0211179	0.225	3722	tags=30%, list=9%, signal=33%
GSE1460_DP_THYMOCYTE_VS_NAIVE_CD4_TCELL_CORD_BLOOD_DN	198	0.425938	1.80071	0.00934579	0.0264922	0.268	5892	tags=35%, list=15%, signal=41%
GSE4748_CYANOBACTERIUM_LPSLIKE_VS_LPS_AND_CYANOBACTERIUM_LPSLIKE_STIM_DC_3H_DN	191	0.362574	1.57662	0.0093985	0.0839243	0.539	6729	tags=32%, list=17%, signal=38%
GSE24671_CTRL_VS_SENDAI_VIRUS_INFECTED_MOUSE_SPLENOCYTES_UP	161	0.49827	1.83475	0.0094518	0.0215667	0.229	3325	tags=31%, list=8%, signal=34%
GSE3982_BCELL_VS_TH2_UP	196	0.461539	1.74218	0.0094697	0.0380611	0.336	5570	tags=36%, list=14%, signal=41%
GSE7219_WT_VS_NIK_NFKB2_KO_LPS_AND_ANTI_CD40_STIM_DC_DN	200	0.453463	1.77253	0.00952381	0.0321079	0.301	6465	tags=41%, list=16%, signal=48%
GSE1460_INTRATHYMIC_T_PROGENITOR_VS_NAIVE_CD4_TCELL_ADULT_BLOOD_DN	197	0.457038	1.74203	0.00952381	0.0380371	0.337	2979	tags=26%, list=7%, signal=28%
GSE3039_ALPHAALPHA_CD8_TCELL_VS_B2_BCELL_UP	200	0.443352	1.77891	0.00956023	0.0308319	0.297	5320	tags=35%, list=13%, signal=40%
GSE20366_TREG_VS_NAIVE_CD4_TCELL_DN	199	0.44004	1.74134	0.00956023	0.0381136	0.337	3292	tags=25%, list=8%, signal=27%
GSE42021_CD24INT_VS_CD24LOW_TCONV_THYMUS_UP	197	0.493745	1.84126	0.00961539	0.0207191	0.223	5023	tags=35%, list=12%, signal=40%
GSE29164_UNTREATED_VS_CD8_TCELL_TREATED_MELANOMA_DAY3_DN	200	0.489603	1.82117	0.00961539	0.0233929	0.253	5301	tags=38%, list=13%, signal=43%
GSE36527_CD69_NEG_VS_POS_TREG_CD62L_LOS_KLRG1_NEG_UP	200	0.553187	1.88485	0.00970874	0.0157274	0.178	4353	tags=40%, list=11%, signal=44%
GSE41176_UNSTIM_VS_ANTI_IGM_STIM_BCELL_1H_UP	195	0.490582	1.82026	0.00972763	0.0235463	0.255	5909	tags=43%, list=15%, signal=50%
GSE29618_BCELL_VS_MONOCYTE_DAY7_FLU_VACCINE_DN	200	0.542763	1.90334	0.00974659	0.014074	0.159	3955	tags=39%, list=10%, signal=43%
GSE16450_IMMATURE_VS_MATURE_NEURON_CELL_LINE_UP	193	0.552525	1.82396	0.00974659	0.0229609	0.246	3592	tags=35%, list=9%, signal=38%
GSE1448_CTRL_VS_ANTI_VBETA5_DP_THYMOCYTE_DN	200	0.453385	1.75156	0.00974659	0.0363136	0.325	4133	tags=34%, list=10%, signal=37%
GSE9509_10MIN_VS_30MIN_LPS_STIM_IL10_KO_MACROPHAGE_DN	193	0.427338	1.67588	0.00974659	0.0549014	0.416	5575	tags=37%, list=14%, signal=43%
GSE21379_WT_VS_SAP_KO_TFH_CD4_TCELL_DN	197	0.428106	1.66598	0.00976562	0.0567822	0.433	4353	tags=30%, list=11%, signal=34%
GSE29618_BCELL_VS_PDC_DAY7_FLU_VACCINE_UP	194	0.546621	1.85431	0.00978474	0.0189753	0.21	4567	tags=45%, list=11%, signal=50%
GSE36826_WT_VS_IL1R_KO_SKIN_STAPH_AUREUS_INF_DN	199	0.513926	1.84256	0.00978474	0.0204762	0.221	5499	tags=40%, list=14%, signal=46%
GSE22886_NAIVE_CD4_TCELL_VS_NKCELL_UP	196	0.463875	1.8172	0.00978474	0.0239703	0.257	3882	tags=31%, list=10%, signal=34%
GSE18281_SUBCAPSULAR_VS_CENTRAL_CORTICAL_REGION_OF_THYMUS_DN	200	0.559357	1.92771	0.00982318	0.0114973	0.138	3946	tags=41%, list=10%, signal=45%
GSE27241_WT_VS_RORGT_KO_TH17_POLARIZED_CD4_TCELL_TREATED_WITH_DIGOXIN_DN	178	0.451692	1.74451	0.00982318	0.0376128	0.335	4365	tags=30%, list=11%, signal=34%
GSE29618_BCELL_VS_MDC_DN	200	0.523501	1.88006	0.00984252	0.0161568	0.186	5657	tags=45%, list=14%, signal=52%
GSE10239_NAIVE_VS_KLRG1HIGH_EFF_CD8_TCELL_UP	198	0.463604	1.78726	0.00984252	0.029163	0.288	4488	tags=35%, list=11%, signal=40%
GSE45365_NK_CELL_VS_BCELL_MCMV_INFECTION_DN	199	0.496129	1.77716	0.00984252	0.031065	0.299	3397	tags=33%, list=8%, signal=35%
GSE3982_EFF_MEMORY_VS_CENT_MEMORY_CD4_TCELL_UP	195	0.420818	1.69217	0.00986193	0.0508646	0.4	3847	tags=26%, list=10%, signal=28%
GSE9960_GRAM_NEG_VS_GRAM_NEG_AND_POS_SEPSIS_PBMC_UP	189	0.443662	1.77962	0.00988142	0.0308194	0.296	4255	tags=30%, list=11%, signal=33%
GSE36392_EOSINOPHIL_VS_MAC_IL25_TREATED_LUNG_UP	200	0.380488	1.58934	0.00988142	0.0791284	0.524	5399	tags=30%, list=13%, signal=34%
GSE1432_CTRL_VS_IFNG_6H_MICROGLIA_DN	200	0.605397	1.91674	0.00994036	0.0124138	0.15	3391	tags=43%, list=8%, signal=46%
GSE37534_UNTREATED_VS_PIOGLITAZONE_TREATED_CD4_TCELL_PPARG1_AND_FOXP3_TRASDUCED_DN	200	0.589531	1.93709	0.00998004	0.0106762	0.129	5339	tags=49%, list=13%, signal=56%
GSE6259_FLT3L_INDUCED_33D1_POS_DC_VS_CD8_TCELL_DN	150	0.442778	1.74658	0.01002	0.0371746	0.333	3213	tags=25%, list=8%, signal=27%
GSE42088_UNINF_VS_LEISHMANIA_INF_DC_2H_DN	200	0.535711	1.95769	0.0100604	0.00935503	0.11	5182	tags=40%, list=13%, signal=46%
GSE18791_CTRL_VS_NEWCASTLE_VIRUS_DC_8H_DN	196	0.604381	1.90616	0.0100806	0.013745	0.155	5250	tags=49%, list=13%, signal=57%
GSE12484_HEALTHY_VS_PERIDONTITIS_NEUTROPHILS_UP	139	0.352296	1.5012	0.0100806	0.109799	0.629	5489	tags=29%, list=14%, signal=33%
GSE10240_IL22_VS_IL22_AND_IL17_STIM_PRIMARY_BRONCHIAL_EPITHELIAL_CELLS_DN	200	0.464636	1.75943	0.0101626	0.0353553	0.314	4631	tags=34%, list=12%, signal=38%
GSE360_DC_VS_MAC_B_MALAYI_HIGH_DOSE_DN	200	0.472619	1.81986	0.0102041	0.0235454	0.255	3792	tags=29%, list=9%, signal=32%
GSE44732_UNSTIM_VS_IL27_STIM_IMATURE_DC_DN	197	0.440033	1.72468	0.0111111	0.0421309	0.36	4085	tags=28%, list=10%, signal=31%
GSE29949_MICROGLIA_VS_DC_BRAIN_DN	199	0.392755	1.65361	0.011194	0.0592804	0.447	4699	tags=30%, list=12%, signal=33%
GSE13306_RA_VS_UNTREATED_MEM_CD4_TCELL_UP	200	0.465535	1.78101	0.011215	0.030565	0.293	3851	tags=32%, list=10%, signal=35%
GSE44649_WT_VS_MIR155_KO_ACTIVATED_CD8_TCELL_UP	199	0.506727	1.85669	0.011257	0.0187738	0.209	4353	tags=38%, list=11%, signal=42%
GSE10325_BCELL_VS_MYELOID_UP	197	0.497012	1.81462	0.0114068	0.0241088	0.259	4481	tags=41%, list=11%, signal=46%
GSE22025_UNTREATED_VS_TGFB1_TREATED_CD4_TCELL_DN	199	0.397858	1.67854	0.0114068	0.0542676	0.414	5235	tags=33%, list=13%, signal=37%
GSE14386_UNTREATED_VS_IFNA_TREATED_ACT_PBMC_MS_PATIENT_DN	158	0.485713	1.75402	0.0114286	0.03594	0.324	4329	tags=36%, list=11%, signal=40%
GSE5099_DAY3_VS_DAY7_MCSF_TREATED_MACROPHAGE_UP	192	0.454709	1.74859	0.0114504	0.0367609	0.329	3861	tags=30%, list=10%, signal=33%
GSE7568_CTRL_VS_24H_TGFB_TREATED_MACROPHAGES_WITH_IL4_AND_DEXAMETHASONE_DN	200	0.372102	1.61313	0.0114504	0.0715969	0.49	3568	tags=23%, list=9%, signal=25%
GSE44955_MCSF_VS_MCSF_AND_IL27_STIM_MACROPHAGE_UP	198	0.463381	1.77576	0.0114943	0.0313414	0.3	3748	tags=30%, list=9%, signal=33%
GSE22935_UNSTIM_VS_24H_MBOVIS_BCG_STIM_MYD88_KO_MACROPHAGE_DN	200	0.418705	1.69428	0.0114943	0.0503046	0.397	4894	tags=30%, list=12%, signal=34%
GSE14415_INDUCED_TREG_VS_FOXP3_KO_INDUCED_TREG_IL2_CULTURE_DN	143	0.449657	1.75426	0.0115163	0.0360046	0.323	4184	tags=26%, list=10%, signal=29%
GSE30083_SP2_VS_SP3_THYMOCYTE_DN	199	0.405882	1.66645	0.0115163	0.0566487	0.432	5065	tags=29%, list=13%, signal=33%
GSE40274_CTRL_VS_FOXP3_AND_EOS_TRANSDUCED_ACTIVATED_CD4_TCELL_UP	169	0.461539	1.71125	0.0115385	0.0455892	0.38	3465	tags=31%, list=9%, signal=34%
GSE40274_CTRL_VS_FOXP3_AND_IRF4_TRANSDUCED_ACTIVATED_CD4_TCELL_UP	159	0.429972	1.69456	0.0115385	0.050309	0.397	2866	tags=23%, list=7%, signal=24%
GSE7852_LN_VS_THYMUS_TCONV_UP	197	0.415763	1.66191	0.0115385	0.0572788	0.44	4757	tags=30%, list=12%, signal=34%
GSE26488_WT_VS_HDAC7_DELTAP_TG_OT2_THYMOCYTE_WITH_PEPTIDE_INJECTION_UP	200	0.394219	1.64454	0.011583	0.0619505	0.454	4602	tags=26%, list=11%, signal=30%
GSE29618_MONOCYTE_VS_MDC_DN	200	0.41795	1.68927	0.0116505	0.0517923	0.404	1722	tags=20%, list=4%, signal=21%
GSE14415_INDUCED_TREG_VS_FOXP3_KO_INDUCED_TREG_IL2_CULTURE_UP	174	0.494445	1.77222	0.0116732	0.0320451	0.301	2587	tags=26%, list=6%, signal=28%
GSE17721_LPS_VS_PAM3CSK4_12H_BMDC_UP	200	0.461817	1.73894	0.0116959	0.038614	0.341	3786	tags=31%, list=9%, signal=34%
GSE3982_MAST_CELL_VS_DC_DN	198	0.429834	1.68053	0.0117188	0.0536861	0.414	2890	tags=26%, list=7%, signal=28%
GSE46606_IRF4_KO_VS_WT_CD40L_IL2_IL5_1DAY_STIMULATED_BCELL_DN	192	0.426303	1.71698	0.0117417	0.0439527	0.372	7142	tags=40%, list=18%, signal=48%
GSE26727_WT_VS_KLF2_KO_LPS_STIM_MACROPHAGE_UP	199	0.406827	1.66541	0.0117417	0.0568246	0.433	5106	tags=33%, list=13%, signal=37%
GSE1460_INTRATHYMIC_T_PROGENITOR_VS_DP_THYMOCYTE_DN	197	0.480027	1.76816	0.0117647	0.0331309	0.303	5909	tags=39%, list=15%, signal=45%
GSE360_L_DONOVANI_VS_M_TUBERCULOSIS_MAC_DN	199	0.443518	1.74037	0.0117878	0.0381728	0.339	5489	tags=35%, list=14%, signal=40%
GSE22601_IMMATURE_CD4_SINGLE_POSITIVE_VS_DOUBLE_POSITIVE_THYMOCYTE_UP	198	0.366649	1.62573	0.0117878	0.0676057	0.481	5527	tags=29%, list=14%, signal=34%
GSE1460_CD4_THYMOCYTE_VS_NAIVE_CD4_TCELL_ADULT_BLOOD_DN	200	0.474403	1.86137	0.0118343	0.0185691	0.203	5268	tags=36%, list=13%, signal=41%
GSE6875_TCONV_VS_FOXP3_KO_TREG_UP	198	0.409315	1.66682	0.0118343	0.0566114	0.432	4863	tags=28%, list=12%, signal=32%
GSE1791_CTRL_VS_NEUROMEDINU_IN_T_CELL_LINE_3H_UP	187	0.491196	1.84851	0.0118577	0.0196771	0.216	5178	tags=35%, list=13%, signal=40%
GSE21380_TFH_VS_GERMINAL_CENTER_TFH_CD4_TCELL_UP	200	0.413601	1.64602	0.0119284	0.0616927	0.454	5635	tags=31%, list=14%, signal=36%
GSE14000_UNSTIM_VS_4H_LPS_DC_DN	197	0.591967	1.89879	0.0119522	0.0144303	0.164	5250	tags=47%, list=13%, signal=53%
GSE33374_CD8_ALPHAALPHA_VS_ALPHABETA_CD161_HIGH_TCELL_UP	199	0.437086	1.77475	0.011976	0.031535	0.301	4876	tags=31%, list=12%, signal=35%
GSE17974_IL4_AND_ANTI_IL12_VS_UNTREATED_48H_ACT_CD4_TCELL_UP	194	0.415198	1.67708	0.012987	0.0546369	0.415	4086	tags=28%, list=10%, signal=31%
GSE26912_TUMORICIDAL_VS_CTRL_MACROPHAGE_DN	200	0.433415	1.75206	0.0130841	0.0363914	0.325	4655	tags=33%, list=12%, signal=37%
GSE32034_LY6C_HIGH_VS_LOW_MONOCYTE_UP	200	0.393408	1.61728	0.0131086	0.0698333	0.487	3276	tags=23%, list=8%, signal=25%
GSE14415_INDUCED_TREG_VS_FOXP3_KO_INDUCED_TREG_DN	181	0.453646	1.75489	0.0131579	0.035959	0.321	3925	tags=28%, list=10%, signal=30%
GSE16450_CTRL_VS_IFNA_6H_STIM_MATURE_NEURON_CELL_LINE_UP	199	0.404837	1.68082	0.0132075	0.0537811	0.412	4914	tags=29%, list=12%, signal=32%
GSE11057_CD4_CENT_MEM_VS_PBMC_DN	195	0.496314	1.80745	0.0132325	0.0253307	0.265	4015	tags=37%, list=10%, signal=41%
GSE15767_MED_VS_SCS_MAC_LN_UP	199	0.483931	1.78727	0.0132325	0.0292337	0.288	5714	tags=41%, list=14%, signal=48%
GSE9601_NFKB_INHIBITOR_VS_PI3K_INHIBITOR_TREATED_HCMV_INF_MONOCYTE_DN	199	0.466326	1.77619	0.0132576	0.0312836	0.299	3528	tags=29%, list=9%, signal=31%
GSE10147_IL3_AND_HIVP17_VS_IL3_AND_CPG_STIM_PDC_UP	153	0.358108	1.52542	0.013308	0.100641	0.597	6304	tags=32%, list=16%, signal=38%
GSE25677_MPL_VS_R848_STIM_BCELL_UP	173	0.468371	1.72675	0.0133588	0.041804	0.355	3430	tags=29%, list=9%, signal=31%
GSE42021_CD24INT_VS_CD24LOW_TREG_THYMUS_DN	196	0.507688	1.84695	0.0135135	0.0199064	0.219	5010	tags=36%, list=12%, signal=41%
GSE1460_DP_THYMOCYTE_VS_NAIVE_CD4_TCELL_ADULT_BLOOD_DN	196	0.467911	1.83583	0.0135135	0.0213815	0.228	4163	tags=31%, list=10%, signal=35%
GSE22886_NAIVE_VS_IGG_IGA_MEMORY_BCELL_DN	196	0.471124	1.80771	0.0135135	0.0253371	0.264	2471	tags=28%, list=6%, signal=29%
GSE2706_R848_VS_R848_AND_LPS_2H_STIM_DC_DN	188	0.479937	1.81544	0.0135397	0.024089	0.258	6461	tags=44%, list=16%, signal=52%
GSE17721_CTRL_VS_POLYIC_4H_BMDC_DN	200	0.448229	1.68883	0.0135922	0.0518871	0.404	5010	tags=34%, list=12%, signal=38%
GSE5589_WT_VS_IL6_KO_LPS_AND_IL6_STIM_MACROPHAGE_45MIN_UP	199	0.379684	1.59334	0.0136452	0.0775982	0.514	4431	tags=25%, list=11%, signal=28%
GSE34156_UNTREATED_VS_24H_NOD2_AND_TLR1_TLR2_LIGAND_TREATED_MONOCYTE_UP	193	0.412812	1.65217	0.0136719	0.0597357	0.448	3066	tags=23%, list=8%, signal=25%
GSE30083_SP1_VS_SP2_THYMOCYTE_DN	199	0.394186	1.6191	0.0136986	0.0696975	0.487	5002	tags=30%, list=12%, signal=34%
GSE19198_CTRL_VS_IL21_TREATED_TCELL_6H_UP	200	0.508445	1.83722	0.0137255	0.0211938	0.228	3997	tags=33%, list=10%, signal=36%
GSE15324_NAIVE_VS_ACTIVATED_CD8_TCELL_UP	200	0.426293	1.68772	0.0137255	0.0521691	0.406	4292	tags=29%, list=11%, signal=32%
GSE41867_DAY6_VS_DAY8_LCMV_CLONE13_EFFECTOR_CD8_TCELL_UP	200	0.460811	1.77227	0.0137525	0.0321082	0.301	4327	tags=29%, list=11%, signal=33%
GSE23925_DARK_ZONE_VS_NAIVE_BCELL_DN	200	0.451876	1.73173	0.0137525	0.0405868	0.351	3920	tags=31%, list=10%, signal=34%
GSE11961_GERMINAL_CENTER_BCELL_DAY7_VS_MEMORY_BCELL_DAY40_DN	200	0.414842	1.65417	0.0137525	0.0592187	0.447	5712	tags=37%, list=14%, signal=42%
GSE17974_CTRL_VS_ACT_IL4_AND_ANTI_IL12_2H_CD4_TCELL_UP	192	0.450287	1.75829	0.0137795	0.0354541	0.317	4501	tags=31%, list=11%, signal=35%
GSE27670_CTRL_VS_BLIMP1_TRANSDUCED_GC_BCELL_UP	199	0.351868	1.47236	0.0139165	0.119269	0.659	6246	tags=30%, list=16%, signal=35%
GSE4590_SMALL_VS_VPREB_POS_LARGE_PRE_BCELL_DN	160	0.420064	1.6842	0.0149533	0.0529893	0.41	4145	tags=27%, list=10%, signal=30%
GSE28737_WT_VS_BCL6_HET_FOLLICULAR_BCELL_DN	200	0.45335	1.71939	0.0150943	0.0435748	0.369	3562	tags=29%, list=9%, signal=32%
GSE22589_SIV_VS_HIV_AND_SIV_INFECTED_DC_UP	200	0.420929	1.69426	0.0150943	0.0502137	0.397	4333	tags=28%, list=11%, signal=31%
GSE6259_FLT3L_INDUCED_VS_WT_SPLENIC_DC_33D1_POS_UP	179	0.476536	1.74047	0.0152091	0.0382304	0.339	3569	tags=31%, list=9%, signal=34%
GSE32986_CURDLAN_LOWDOSE_VS_CURDLAN_HIGHDOSE_STIM_DC_DN	200	0.484902	1.75632	0.0153257	0.0357297	0.318	4042	tags=33%, list=10%, signal=36%
GSE22025_TGFB1_VS_TGFB1_AND_PROGESTERONE_TREATED_CD4_TCELL_UP	199	0.425502	1.66124	0.0153257	0.0572902	0.441	5051	tags=30%, list=13%, signal=34%
GSE7460_CD8_TCELL_VS_TREG_ACT_UP	200	0.443456	1.70218	0.0153551	0.047633	0.387	4115	tags=29%, list=10%, signal=32%
GSE9988_ANTI_TREM1_VS_LPS_MONOCYTE_DN	197	0.52654	1.79611	0.0153846	0.027394	0.276	5670	tags=43%, list=14%, signal=50%
GSE5542_UNTREATED_VS_IFNG_TREATED_EPITHELIAL_CELLS_24H_UP	198	0.491152	1.75865	0.0153846	0.0355127	0.315	4174	tags=33%, list=10%, signal=36%
GSE6259_CD4_TCELL_VS_CD8_TCELL_DN	184	0.503615	1.72804	0.0153846	0.0414988	0.353	3113	tags=32%, list=8%, signal=34%
GSE2770_TGFB_AND_IL4_VS_IL4_TREATED_ACT_CD4_TCELL_2H_UP	199	0.404904	1.66807	0.015444	0.0563499	0.429	5273	tags=31%, list=13%, signal=36%
GSE2770_IL12_AND_TGFB_VS_IL4_TREATED_ACT_CD4_TCELL_6H_DN	199	0.358643	1.53763	0.0154739	0.0974231	0.576	6942	tags=35%, list=17%, signal=42%
GSE4984_UNTREATED_VS_GALECTIN1_TREATED_DC_DN	190	0.501642	1.79308	0.0155039	0.0280001	0.279	3427	tags=38%, list=9%, signal=42%
GSE26156_DOUBLE_POSITIVE_VS_CD4_SINGLE_POSITIVE_THYMOCYTE_UP	199	0.464566	1.76717	0.015534	0.0332117	0.305	4659	tags=36%, list=12%, signal=40%
GSE21033_1H_VS_24H_POLYIC_STIM_DC_DN	171	0.44569	1.71887	0.0157171	0.0435976	0.37	4821	tags=36%, list=12%, signal=41%
GSE9960_HEALTHY_VS_GRAM_POS_SEPSIS_PBMC_DN	194	0.508977	1.81477	0.0158103	0.0241419	0.259	3798	tags=37%, list=9%, signal=41%
GSE32533_MIR17_KO_VS_MIR17_OVEREXPRESS_ACT_CD4_TCELL_DN	200	0.40557	1.60454	0.0159046	0.074083	0.5	3113	tags=24%, list=8%, signal=26%
GSE32901_NAIVE_VS_TH17_ENRICHED_CD4_TCELL_UP	154	0.442314	1.67096	0.0163339	0.0558115	0.423	4881	tags=32%, list=12%, signal=37%
GSE40274_XBP1_VS_FOXP3_AND_XBP1_TRANSDUCED_ACTIVATED_CD4_TCELL_UP	200	0.480046	1.74155	0.0166976	0.038119	0.337	5349	tags=39%, list=13%, signal=44%
GSE3203_WT_VS_IFNAR1_KO_INFLUENZA_INFECTED_LN_BCELL_UP	200	0.372572	1.5926	0.0168539	0.0778919	0.516	5468	tags=28%, list=14%, signal=32%
GSE7219_UNSTIM_VS_LPS_AND_ANTI_CD40_STIM_NIK_NFKB2_KO_DC_DN	190	0.48269	1.77829	0.0169173	0.0308438	0.297	3549	tags=34%, list=9%, signal=37%
GSE3982_DC_VS_TH1_UP	200	0.450152	1.70708	0.0169173	0.0466551	0.381	5026	tags=37%, list=12%, signal=42%
GSE17721_0.5H_VS_24H_CPG_BMDC_DN	200	0.448099	1.67102	0.0170132	0.0558873	0.423	4052	tags=32%, list=10%, signal=35%
GSE21774_CD62L_POS_CD56_DIM_VS_CD62L_NEG_CD56_DIM_NK_CELL_UP	199	0.47998	1.77946	0.0170455	0.0307924	0.296	3391	tags=30%, list=8%, signal=32%
GSE34217_MIR17_92_OVEREXPRESS_VS_WT_ACT_CD8_TCELL_UP	135	0.385487	1.57731	0.0170455	0.0836543	0.537	2547	tags=19%, list=6%, signal=20%
GSE32423_MEMORY_VS_NAIVE_CD8_TCELL_IL7_IL4_UP	198	0.340755	1.47362	0.0170778	0.119003	0.658	5617	tags=27%, list=14%, signal=32%
GSE38304_MYC_NEG_VS_POS_GC_BCELL_DN	200	0.423557	1.69159	0.0171103	0.051086	0.4	3776	tags=27%, list=9%, signal=30%
GSE9988_LOW_LPS_VS_ANTI_TREM1_AND_LPS_MONOCYTE_UP	196	0.51708	1.79443	0.0171756	0.0278035	0.279	4130	tags=37%, list=10%, signal=41%
GSE6259_FLT3L_INDUCED_33D1_POS_DC_VS_CD4_TCELL_UP	171	0.496373	1.74876	0.0171756	0.0368699	0.329	4365	tags=35%, list=11%, signal=39%
GSE9509_LPS_VS_LPS_AND_IL10_STIM_IL10_KO_MACROPHAGE_30MIN_UP	197	0.419917	1.66326	0.0171756	0.057078	0.437	5037	tags=29%, list=13%, signal=33%
GSE7831_CPG_VS_INFLUENZA_STIM_PDC_1H_DN	200	0.410858	1.63435	0.0172084	0.0648767	0.463	5208	tags=31%, list=13%, signal=35%
GSE2770_IL12_AND_TGFB_ACT_VS_ACT_CD4_TCELL_6H_UP	198	0.448855	1.72206	0.0172414	0.0427598	0.364	5570	tags=34%, list=14%, signal=39%
GSE45739_UNSTIM_VS_ACD3_ACD28_STIM_WT_CD4_TCELL_UP	200	0.425594	1.67516	0.017341	0.05479	0.418	5180	tags=34%, list=13%, signal=38%
GSE2770_TGFB_AND_IL4_VS_IL12_TREATED_ACT_CD4_TCELL_6H_UP	200	0.50337	1.7261	0.0173745	0.0419708	0.356	3658	tags=33%, list=9%, signal=36%
GSE12392_IFNAR_KO_VS_IFNB_KO_CD8_NEG_SPLEEN_DC_DN	200	0.429837	1.66252	0.0174081	0.0572905	0.438	5066	tags=32%, list=13%, signal=36%
GSE35825_UNTREATED_VS_IFNA_STIM_MACROPHAGE_DN	168	0.489217	1.78726	0.0174419	0.0290912	0.288	4055	tags=34%, list=10%, signal=38%
GSE17721_PAM3CSK4_VS_CPG_16H_BMDC_DN	199	0.404561	1.59906	0.0174419	0.0759416	0.503	4406	tags=30%, list=11%, signal=33%
GSE34205_HEALTHY_VS_RSV_INF_INFANT_PBMC_UP	194	0.44725	1.69963	0.0175097	0.048637	0.391	3468	tags=30%, list=9%, signal=33%
GSE5589_UNSTIM_VS_180MIN_LPS_AND_IL10_STIM_MACROPHAGE_DN	199	0.438301	1.69471	0.0175439	0.050346	0.397	3332	tags=28%, list=8%, signal=30%
GSE43863_NAIVE_VS_LY6C_LOW_CXCR5NEG_CD4_EFF_TCELL_D6_LCMV_UP	191	0.376396	1.60207	0.0175439	0.0749574	0.502	5512	tags=31%, list=14%, signal=36%
GSE29618_BCELL_VS_MONOCYTE_DN	199	0.549823	1.8441	0.0175781	0.0203477	0.22	4041	tags=42%, list=10%, signal=46%
GSE28737_WT_VS_BCL6_KO_MARGINAL_ZONE_BCELL_UP	199	0.380678	1.61907	0.0175781	0.0695989	0.487	5538	tags=31%, list=14%, signal=36%
GSE11057_NAIVE_CD4_VS_PBMC_CD4_TCELL_DN	197	0.49326	1.73817	0.0176471	0.0387851	0.342	4918	tags=38%, list=12%, signal=43%
GSE22886_CD8_TCELL_VS_BCELL_NAIVE_DN	198	0.419951	1.61052	0.0176471	0.0722488	0.491	3749	tags=27%, list=9%, signal=30%
GSE17301_CTRL_VS_48H_IFNA2_STIM_CD8_TCELL_DN	195	0.456635	1.72776	0.0177165	0.041519	0.354	5103	tags=36%, list=13%, signal=41%
GSE28726_NAIVE_VS_ACTIVATED_VA24NEG_NKTCELL_DN	197	0.395033	1.62976	0.0177165	0.0661765	0.47	5094	tags=31%, list=13%, signal=36%
GSE29615_CTRL_VS_DAY7_LAIV_FLU_VACCINE_PBMC_UP	192	0.328101	1.46638	0.0178218	0.121593	0.669	4841	tags=22%, list=12%, signal=25%
GSE13485_CTRL_VS_DAY3_YF17D_VACCINE_PBMC_DN	199	0.584597	1.87353	0.0179641	0.0171264	0.195	5714	tags=52%, list=14%, signal=60%
GSE21360_NAIVE_VS_PRIMARY_MEMORY_CD8_TCELL_DN	182	0.456936	1.74089	0.018622	0.0381699	0.338	4049	tags=31%, list=10%, signal=35%
GSE37532_WT_VS_PPARG_KO_VISCERAL_ADIPOSE_TISSUE_TCONV_UP	199	0.448326	1.7025	0.018622	0.0476667	0.387	5246	tags=36%, list=13%, signal=41%
GSE43863_NAIVE_VS_MEMORY_LY6C_INT_CXCR5POS_CD4_TCELL_D150_LCMV_UP	200	0.488075	1.78874	0.0188324	0.0289214	0.287	4006	tags=33%, list=10%, signal=36%
GSE17721_CPG_VS_GARDIQUIMOD_12H_BMDC_UP	200	0.370165	1.54136	0.0188679	0.0965659	0.573	3271	tags=21%, list=8%, signal=22%
GSE22886_CD8_VS_CD4_NAIVE_TCELL_DN	196	0.424482	1.70978	0.0189394	0.0458796	0.38	4663	tags=31%, list=12%, signal=35%
GSE30083_SP1_VS_SP4_THYMOCYTE_DN	199	0.492643	1.75283	0.0190114	0.0362415	0.325	5231	tags=40%, list=13%, signal=46%
GSE17974_0H_VS_6H_IN_VITRO_ACT_CD4_TCELL_UP	189	0.455795	1.75126	0.019084	0.0363348	0.325	4164	tags=29%, list=10%, signal=32%
GSE37532_TREG_VS_TCONV_CD4_TCELL_FROM_LN_DN	200	0.463507	1.7135	0.019084	0.044959	0.379	3906	tags=31%, list=10%, signal=34%
GSE7460_FOXP3_MUT_VS_HET_ACT_TCONV_UP	198	0.39349	1.65173	0.0191205	0.0598301	0.449	5892	tags=34%, list=15%, signal=40%
GSE9988_LPS_VS_CTRL_TREATED_MONOCYTE_UP	196	0.475579	1.75794	0.0191571	0.0354825	0.317	5909	tags=38%, list=15%, signal=45%
GSE2405_0H_VS_3H_A_PHAGOCYTOPHILUM_STIM_NEUTROPHIL_DN	198	0.34796	1.5243	0.0191571	0.100987	0.602	5328	tags=28%, list=13%, signal=32%
GSE9988_ANTI_TREM1_AND_LPS_VS_VEHICLE_TREATED_MONOCYTES_DN	197	0.531297	1.82587	0.019305	0.022814	0.244	3324	tags=37%, list=8%, signal=40%
GSE35685_CD34POS_CD10NEG_CD62LPOS_VS_CD34POS_CD10POS_BONE_MARROW_DN	200	0.489217	1.76284	0.0193798	0.0344232	0.313	3350	tags=32%, list=8%, signal=35%
GSE11057_PBMC_VS_MEM_CD4_TCELL_DN	196	0.474838	1.74494	0.0193798	0.0375544	0.335	4673	tags=36%, list=12%, signal=41%
GSE30083_SP2_VS_SP3_THYMOCYTE_UP	199	0.378699	1.54668	0.0193798	0.0946437	0.569	4655	tags=24%, list=12%, signal=27%
GSE17974_IL4_AND_ANTI_IL12_VS_UNTREATED_6H_ACT_CD4_TCELL_UP	188	0.35499	1.50043	0.0194553	0.110047	0.629	4525	tags=22%, list=11%, signal=25%
GSE23114_WT_VS_SLE2C1_MOUSE_SPLEEN_B1A_BCELL_DN	199	0.421857	1.69117	0.0196078	0.0511833	0.403	5094	tags=34%, list=13%, signal=38%
GSE14415_NATURAL_TREG_VS_FOXP3_KO_NATURAL_TREG_UP	152	0.412945	1.6029	0.0196464	0.0745774	0.501	4179	tags=29%, list=10%, signal=32%
GSE43863_DAY6_EFF_VS_DAY150_MEM_TH1_CD4_TCELL_DN	199	0.461471	1.66884	0.019685	0.0561968	0.427	4145	tags=37%, list=10%, signal=41%
GSE24671_CTRL_VS_BAKIMULC_INFECTED_MOUSE_SPLENOCYTES_DN	170	0.465044	1.75427	0.0197628	0.0360814	0.323	4188	tags=34%, list=10%, signal=38%
GSE23114_WT_VS_SLE2C1_MOUSE_PERITONEAL_CAVITY_B1A_BCELL_DN	194	0.341093	1.50398	0.0197628	0.108498	0.624	3794	tags=20%, list=9%, signal=22%
GSE19888_ADENOSINE_A3R_INH_VS_TCELL_MEMBRANES_ACT_MAST_CELL_UP	200	0.568026	1.85359	0.0204499	0.0190753	0.211	4908	tags=44%, list=12%, signal=49%
GSE37301_HEMATOPOIETIC_STEM_CELL_VS_CD4_TCELL_UP	174	0.505708	1.71796	0.0204499	0.0436747	0.371	3237	tags=31%, list=8%, signal=34%
GSE22229_UNTREATED_VS_IMMUNOSUPP_THERAPY_RENAL_TRANSPLANT_PATIENT_PBMC_DN	199	0.423755	1.68003	0.0206767	0.0538	0.414	3926	tags=30%, list=10%, signal=33%
GSE11961_FOLLICULAR_BCELL_VS_MEMORY_BCELL_DAY7_UP	200	0.427728	1.67783	0.0207156	0.0543971	0.414	4908	tags=34%, list=12%, signal=38%
GSE369_PRE_VS_POST_IL6_INJECTION_IFNG_KO_LIVER_UP	200	0.405267	1.58454	0.0208729	0.0810583	0.529	3444	tags=24%, list=9%, signal=26%
GSE35825_UNTREATED_VS_IFNG_STIM_MACROPHAGE_UP	200	0.482945	1.74226	0.0209125	0.038118	0.336	4188	tags=33%, list=10%, signal=36%
GSE24142_EARLY_THYMIC_PROGENITOR_VS_DN3_THYMOCYTE_FETAL_UP	200	0.463385	1.6762	0.0209924	0.0548657	0.416	5258	tags=38%, list=13%, signal=43%
GSE36891_UNSTIM_VS_POLYIC_TLR3_STIM_PERITONEAL_MACROPHAGE_UP	149	0.436297	1.66144	0.0210728	0.0572964	0.441	5749	tags=39%, list=14%, signal=45%
GSE46242_TH1_VS_ANERGIC_TH1_CD4_TCELL_UP	196	0.408868	1.65715	0.0210728	0.0583121	0.446	2822	tags=24%, list=7%, signal=26%
GSE20366_TREG_VS_TCONV_DN	200	0.426678	1.64057	0.0210728	0.0630422	0.457	2968	tags=26%, list=7%, signal=27%
GSE6566_STRONG_VS_WEAK_DC_STIMULATED_CD4_TCELL_DN	189	0.404228	1.61875	0.0210728	0.0695495	0.487	5247	tags=31%, list=13%, signal=35%
GSE22886_NAIVE_TCELL_VS_MONOCYTE_UP	198	0.481326	1.72379	0.0211132	0.0423283	0.361	2778	tags=28%, list=7%, signal=30%
GSE40666_UNTREATED_VS_IFNA_STIM_STAT4_KO_EFFECTOR_CD8_TCELL_90MIN_UP	200	0.437367	1.69387	0.0211538	0.0502807	0.398	3567	tags=25%, list=9%, signal=27%
GSE2706_R848_VS_LPS_2H_STIM_DC_DN	185	0.382894	1.59483	0.0213178	0.0772372	0.512	6348	tags=34%, list=16%, signal=40%
GSE9601_UNTREATED_VS_PI3K_INHIBITOR_TREATED_HCMV_INF_MONOCYTE_UP	175	0.486601	1.75406	0.0214008	0.0360105	0.323	5106	tags=37%, list=13%, signal=42%
GSE28726_ACT_CD4_TCELL_VS_ACT_NKTCELL_DN	199	0.474545	1.71136	0.0214844	0.0456537	0.38	4770	tags=36%, list=12%, signal=41%
GSE30971_WBP7_HET_VS_KO_MACROPHAGE_DN	199	0.453748	1.68527	0.0215264	0.0528608	0.407	4130	tags=33%, list=10%, signal=36%
GSE36891_POLYIC_TLR3_VS_PAM_TLR2_STIM_PERITONEAL_MACROPHAGE_UP	153	0.470694	1.73159	0.021611	0.0405581	0.351	4354	tags=35%, list=11%, signal=39%
GSE18791_UNSTIM_VS_NEWCATSLE_VIRUS_DC_10H_DN	195	0.5808	1.8573	0.0221774	0.0188265	0.209	6454	tags=56%, list=16%, signal=66%
GSE3982_MAST_CELL_VS_BCELL_DN	197	0.438058	1.68277	0.0222222	0.0532182	0.41	5102	tags=33%, list=13%, signal=38%
GSE19198_CTRL_VS_IL21_TREATED_TCELL_24H_DN	200	0.437971	1.67804	0.0223464	0.0543979	0.414	4597	tags=33%, list=11%, signal=37%
GSE33513_TCF7_KO_VS_HET_EARLY_THYMIC_PROGENITOR_UP	199	0.364429	1.53615	0.0224299	0.0976279	0.58	4406	tags=27%, list=11%, signal=30%
GSE7852_TREG_VS_TCONV_DN	199	0.460343	1.67547	0.0225141	0.0547848	0.417	3714	tags=29%, list=9%, signal=31%
GSE3982_NEUTROPHIL_VS_EFF_MEMORY_CD4_TCELL_UP	199	0.469614	1.72932	0.0226415	0.0411811	0.352	3569	tags=32%, list=9%, signal=35%
GSE39820_CTRL_VS_IL1B_IL6_IL23A_CD4_TCELL_DN	198	0.421876	1.61911	0.0226415	0.0697982	0.487	4015	tags=29%, list=10%, signal=32%
GSE15330_HSC_VS_LYMPHOID_PRIMED_MULTIPOTENT_PROGENITOR_UP	200	0.427432	1.62111	0.0226843	0.0693427	0.485	3744	tags=30%, list=9%, signal=33%
GSE19401_UNSTIM_VS_RETINOIC_ACID_AND_PAM2CSK4_STIM_FOLLICULAR_DC_DN	199	0.456775	1.66381	0.0228137	0.0569316	0.435	5161	tags=36%, list=13%, signal=41%
GSE36392_EOSINOPHIL_VS_NEUTROPHIL_IL25_TREATED_LUNG_UP	200	0.439178	1.64706	0.0228137	0.0615475	0.454	5200	tags=36%, list=13%, signal=41%
GSE21063_CTRL_VS_ANTI_IGM_STIM_BCELL_3H_UP	190	0.408353	1.61156	0.0228137	0.0720449	0.491	4628	tags=30%, list=11%, signal=34%
GSE9650_EXHAUSTED_VS_MEMORY_CD8_TCELL_UP	200	0.365773	1.49279	0.0228137	0.11257	0.643	4142	tags=26%, list=10%, signal=29%
GSE40274_CTRL_VS_FOXP3_TRANSDUCED_ACTIVATED_CD4_TCELL_DN	200	0.491047	1.73198	0.0229008	0.0406029	0.35	4359	tags=35%, list=11%, signal=39%
GSE30971_CTRL_VS_LPS_STIM_MACROPHAGE_WBP7_KO_2H_DN	199	0.457835	1.71096	0.0229446	0.0455944	0.38	5254	tags=35%, list=13%, signal=40%
GSE360_CTRL_VS_T_GONDII_DC_UP	199	0.438513	1.66171	0.0229885	0.0572615	0.441	5254	tags=33%, list=13%, signal=37%
GSE33425_CD8_ALPHAALPHA_VS_ALPHABETA_CD161_HIGH_TCELL_UP	200	0.477301	1.7096	0.0230326	0.0458653	0.38	2919	tags=32%, list=7%, signal=34%
GSE30971_WBP7_HET_VS_KO_MACROPHAGE_2H_LPS_STIM_UP	200	0.444262	1.63675	0.0231214	0.0641705	0.46	4354	tags=32%, list=11%, signal=36%
GSE22886_NAIVE_TCELL_VS_NKCELL_UP	198	0.428216	1.65415	0.023166	0.0591294	0.447	3980	tags=27%, list=10%, signal=30%
GSE2706_UNSTIM_VS_8H_LPS_AND_R848_DC_DN	195	0.477302	1.74714	0.0232558	0.0371509	0.333	3798	tags=33%, list=9%, signal=36%
GSE2770_TGFB_AND_IL4_ACT_VS_ACT_CD4_TCELL_48H_DN	198	0.428094	1.69081	0.0232558	0.0512485	0.403	5446	tags=35%, list=14%, signal=41%
GSE3982_EOSINOPHIL_VS_NEUTROPHIL_DN	195	0.427364	1.63519	0.023301	0.0647747	0.463	4145	tags=31%, list=10%, signal=34%
GSE27859_CD11C_INT_F480_HI_MACROPHAGE_VS_CD11C_ING_F480_INT_DC_DN	200	0.424873	1.61548	0.023301	0.070622	0.489	4182	tags=33%, list=10%, signal=37%
GSE20366_EX_VIVO_VS_DEC205_CONVERSION_NAIVE_CD4_TCELL_UP	198	0.44589	1.67386	0.0233463	0.0552449	0.419	3050	tags=27%, list=8%, signal=29%
GSE34006_UNTREATED_VS_A2AR_AGONIST_TREATED_TREG_DN	200	0.419478	1.66078	0.0233463	0.0573831	0.442	4281	tags=28%, list=11%, signal=31%
GSE10240_CTRL_VS_IL17_STIM_PRIMARY_BRONCHIAL_EPITHELIAL_CELLS_DN	198	0.451651	1.72809	0.0233918	0.0415619	0.353	4748	tags=38%, list=12%, signal=43%
GSE5542_IFNG_VS_IFNA_TREATED_EPITHELIAL_CELLS_6H_DN	200	0.365481	1.57754	0.0233918	0.0836356	0.537	6875	tags=32%, list=17%, signal=38%
GSE32164_RESTING_DIFFERENTIATED_VS_CMYC_INHIBITED_MACROPHAGE_UP	200	0.415405	1.60604	0.0235756	0.0738638	0.499	5437	tags=34%, list=14%, signal=39%
GSE2826_XID_VS_BTK_KO_BCELL_DN	200	0.409984	1.64267	0.0237154	0.0625264	0.454	3260	tags=26%, list=8%, signal=28%
GSE21546_WT_VS_SAP1A_KO_DP_THYMOCYTES_UP	196	0.620671	1.86578	0.0237624	0.0180661	0.201	4908	tags=51%, list=12%, signal=57%
GSE360_DC_VS_MAC_T_GONDII_UP	197	0.381916	1.54841	0.0237624	0.0938608	0.569	3881	tags=23%, list=10%, signal=26%
GSE29618_PRE_VS_DAY7_POST_LAIV_FLU_VACCINE_PDC_UP	195	0.347909	1.51505	0.0237624	0.103816	0.613	4696	tags=29%, list=12%, signal=32%
GSE2585_THYMIC_DC_VS_THYMIC_MACROPHAGE_DN	198	0.402268	1.61154	0.0241935	0.0719457	0.491	5247	tags=32%, list=13%, signal=36%
GSE2770_TGFB_AND_IL4_VS_IL12_TREATED_ACT_CD4_TCELL_2H_DN	197	0.428122	1.68583	0.0242537	0.0527373	0.407	4412	tags=30%, list=11%, signal=33%
GSE40274_CTRL_VS_EOS_TRANSDUCED_ACTIVATED_CD4_TCELL_DN	150	0.430733	1.65343	0.0247148	0.0592682	0.447	4488	tags=31%, list=11%, signal=35%
GSE6259_33D1_POS_VS_DEC205_POS_FLT3L_INDUCED_SPLENIC_DC_UP	175	0.452625	1.67267	0.0247619	0.0555483	0.42	4005	tags=30%, list=10%, signal=33%
GSE41867_NAIVE_VS_DAY6_LCMV_EFFECTOR_CD8_TCELL_UP	200	0.466741	1.71087	0.0248092	0.0455445	0.38	4529	tags=34%, list=11%, signal=38%
GSE7460_FOXP3_MUT_VS_WT_ACT_TCONV_UP	200	0.44085	1.66881	0.0248092	0.0561212	0.427	3666	tags=29%, list=9%, signal=32%
GSE3039_CD4_TCELL_VS_ALPHAALPHA_CD8_TCELL_UP	199	0.424551	1.63358	0.0248092	0.0649276	0.464	5044	tags=35%, list=13%, signal=40%
GSE17721_LPS_VS_POLYIC_24H_BMDC_DN	199	0.44352	1.65663	0.0248566	0.0583598	0.446	4506	tags=35%, list=11%, signal=39%
GSE15735_CTRL_VS_HDAC_INHIBITOR_TREATED_CD4_TCELL_2H_UP	199	0.454221	1.68475	0.0249042	0.052877	0.408	4481	tags=32%, list=11%, signal=36%
GSE19401_PAM2CSK4_VS_RETINOIC_ACID_AND_PAM2CSK4_STIM_FOLLICULAR_DC_DN	199	0.452514	1.69548	0.024952	0.0501243	0.395	3711	tags=27%, list=9%, signal=29%
GSE17974_0H_VS_2H_IN_VITRO_ACT_CD4_TCELL_UP	197	0.420509	1.6593	0.024952	0.0577761	0.444	4529	tags=29%, list=11%, signal=32%
GSE26488_WT_VS_VP16_TRANSGENIC_HDAC7_KO_DOUBLE_POSITIVE_THYMOCYTE_DN	169	0.419684	1.58644	0.024952	0.0800951	0.528	3338	tags=27%, list=8%, signal=29%
GSE14699_NAIVE_VS_DELETIONAL_TOLERANCE_CD8_TCELL_DN	199	0.44785	1.64545	0.0251451	0.0618636	0.454	4828	tags=33%, list=12%, signal=38%
GSE9988_ANTI_TREM1_VS_ANTI_TREM1_AND_LPS_MONOCYTE_DN	194	0.493885	1.76397	0.0251938	0.0342381	0.312	5564	tags=40%, list=14%, signal=46%
GSE29164_UNTREATED_VS_CD8_TCELL_AND_IL12_TREATED_MELANOMA_DAY7_DN	200	0.393156	1.61206	0.0251938	0.072043	0.491	5208	tags=27%, list=13%, signal=31%
GSE26290_CTRL_VS_AKT_INHIBITOR_TREATED_ANTI_CD3_AND_IL2_STIM_CD8_TCELL_DN	197	0.453949	1.64952	0.0252427	0.0606526	0.451	3639	tags=30%, list=9%, signal=33%
GSE17721_LPS_VS_GARDIQUIMOD_24H_BMDC_UP	199	0.406825	1.60454	0.0253411	0.0739787	0.5	4237	tags=28%, list=11%, signal=31%
GSE17974_CTRL_VS_ACT_IL4_AND_ANTI_IL12_6H_CD4_TCELL_UP	192	0.421969	1.63368	0.0253906	0.064976	0.464	4095	tags=28%, list=10%, signal=31%
GSE3337_CTRL_VS_16H_IFNG_IN_CD8POS_DC_UP	199	0.402924	1.60078	0.0253906	0.075291	0.502	4005	tags=28%, list=10%, signal=31%
GSE22601_DOUBLE_POSITIVE_VS_CD8_SINGLE_POSITIVE_THYMOCYTE_UP	200	0.475346	1.68337	0.0261194	0.0531539	0.41	3267	tags=30%, list=8%, signal=32%
GSE1566_WT_VS_EZH2_KO_LN_TCELL_UP	197	0.350946	1.51412	0.0261194	0.104141	0.613	3443	tags=22%, list=9%, signal=24%
GSE17186_MEMORY_VS_CD21HIGH_TRANSITIONAL_BCELL_DN	200	0.473869	1.68413	0.0264151	0.0529211	0.41	4651	tags=35%, list=12%, signal=39%
GSE17721_PAM3CSK4_VS_GADIQUIMOD_12H_BMDC_DN	200	0.435424	1.63858	0.0264151	0.063749	0.458	3680	tags=31%, list=9%, signal=34%
GSE8835_CD4_VS_CD8_TCELL_CLL_PATIENT_DN	200	0.424431	1.67094	0.026616	0.0557276	0.423	5374	tags=32%, list=13%, signal=37%
GSE22432_PDC_VS_TGFB1_TREATEDCOMMON_DC_PROGENITOR_DN	199	0.471125	1.70727	0.0266667	0.0466699	0.381	4015	tags=30%, list=10%, signal=33%
GSE12845_IGD_POS_VS_NEG_BLOOD_BCELL_UP	199	0.420486	1.64503	0.0266667	0.0619306	0.454	4477	tags=29%, list=11%, signal=33%
GSE22589_HEALTHY_VS_SIV_INFECTED_DC_DN	199	0.402414	1.56357	0.0266667	0.0881136	0.552	3350	tags=23%, list=8%, signal=25%
GSE40274_CTRL_VS_IRF4_TRANSDUCED_ACTIVATED_CD4_TCELL_UP	162	0.437733	1.63537	0.0267176	0.0648055	0.463	3936	tags=31%, list=10%, signal=34%
GSE29164_DAY3_VS_DAY7_CD8_TCELL_TREATED_MELANOMA_UP	200	0.400185	1.59573	0.0268199	0.0769731	0.511	5112	tags=32%, list=13%, signal=36%
GSE28783_ANTI_MIR33_VS_CTRL_ATHEROSCLEROSIS_MACROPHAGE_UP	199	0.358132	1.48826	0.0268714	0.114286	0.645	3174	tags=20%, list=8%, signal=21%
GSE21670_TGFB_VS_IL6_TREATED_STAT3_KO_CD4_TCELL_DN	200	0.448197	1.66954	0.0269231	0.0561039	0.425	5044	tags=35%, list=13%, signal=40%
GSE7460_CTRL_VS_TGFB_TREATED_ACT_FOXP3_MUT_TCONV_DN	200	0.388623	1.60591	0.026975	0.0738318	0.499	4359	tags=26%, list=11%, signal=29%
GSE7831_UNSTIM_VS_CPG_STIM_PDC_4H_DN	199	0.396558	1.6017	0.026975	0.0750522	0.502	4567	tags=30%, list=11%, signal=33%
GSE22886_UNSTIM_VS_IL15_STIM_NKCELL_UP	196	0.446103	1.67091	0.0271318	0.0556427	0.423	6005	tags=39%, list=15%, signal=45%
GSE7219_UNSTIM_VS_LPS_AND_ANTI_CD40_STIM_DC_UP	173	0.454947	1.62339	0.0271318	0.0685764	0.485	4068	tags=30%, list=10%, signal=33%
GSE36527_CD62L_HIGH_CD69_NEG_VS_CD62L_LOW_CD69_POS_TREG_KLRG1_NEG_DN	200	0.388541	1.604	0.0271845	0.0741205	0.5	3444	tags=26%, list=9%, signal=29%
GSE25088_WT_VS_STAT6_KO_MACROPHAGE_ROSIGLITAZONE_AND_IL4_STIM_DN	195	0.372048	1.53325	0.0272904	0.0985378	0.586	5090	tags=31%, list=13%, signal=35%
GSE360_T_GONDII_VS_B_MALAYI_LOW_DOSE_DC_UP	196	0.402943	1.59094	0.027451	0.0784574	0.52	4856	tags=32%, list=12%, signal=36%
GSE7460_CTRL_VS_FOXP3_OVEREXPR_TCONV_1_DN	200	0.389371	1.56307	0.0275049	0.0882814	0.552	5429	tags=32%, list=13%, signal=36%
GSE23568_CTRL_VS_ID3_TRANSDUCED_CD8_TCELL_UP	200	0.465322	1.66406	0.0277228	0.0569279	0.435	4890	tags=39%, list=12%, signal=44%
GSE24142_DN2_VS_DN3_THYMOCYTE_DN	199	0.417077	1.58057	0.027881	0.0825008	0.533	4353	tags=30%, list=11%, signal=34%
GSE32901_NAIVE_VS_TH17_NEG_CD4_TCELL_DN	125	0.362687	1.48762	0.028169	0.114442	0.645	3031	tags=20%, list=8%, signal=22%
GSE3982_DC_VS_TH2_UP	200	0.421666	1.62966	0.0281955	0.0661267	0.47	4489	tags=33%, list=11%, signal=37%
GSE24972_MARGINAL_ZONE_BCELL_VS_FOLLICULAR_BCELL_DN	200	0.364321	1.52084	0.0281955	0.102066	0.605	3506	tags=23%, list=9%, signal=25%
GSE5503_LIVER_DC_VS_PLN_DC_ACTIVATED_ALLOGENIC_TCELL_UP	199	0.435883	1.70585	0.0282258	0.0468577	0.382	3581	tags=30%, list=9%, signal=33%
GSE30971_CTRL_VS_LPS_STIM_MACROPHAGE_WBP7_HET_2H_DN	199	0.450921	1.66719	0.0283019	0.0565567	0.431	5254	tags=36%, list=13%, signal=41%
GSE21360_TERTIARY_VS_QUATERNARY_MEMORY_CD8_TCELL_UP	183	0.433861	1.67107	0.0284091	0.0559569	0.423	4049	tags=30%, list=10%, signal=33%
GSE22935_UNSTIM_VS_48H_MBOVIS_BCG_STIM_MYD88_KO_MACROPHAGE_DN	199	0.355069	1.50256	0.0285171	0.109271	0.627	4486	tags=27%, list=11%, signal=30%
GSE25123_IL4_VS_IL4_AND_ROSIGLITAZONE_STIM_PPARG_KO_MACROPHAGE_DAY10_DN	195	0.438465	1.68755	0.0285714	0.052147	0.406	4957	tags=33%, list=12%, signal=38%
GSE21360_SECONDARY_VS_TERTIARY_MEMORY_CD8_TCELL_DN	166	0.444092	1.66437	0.0286807	0.0568865	0.435	4655	tags=34%, list=12%, signal=39%
GSE360_T_GONDII_VS_B_MALAYI_LOW_DOSE_DC_DN	199	0.427718	1.64463	0.0287356	0.0620171	0.454	3296	tags=27%, list=8%, signal=29%
GSE11961_MEMORY_BCELL_DAY7_VS_GERMINAL_CENTER_BCELL_DAY7_DN	200	0.402558	1.56907	0.0287356	0.0864762	0.547	3876	tags=25%, list=10%, signal=28%
GSE36888_UNTREATED_VS_IL2_TREATED_STAT5_AB_KNOCKIN_TCELL_6H_UP	193	0.41211	1.58677	0.0289017	0.0801427	0.528	3521	tags=25%, list=9%, signal=28%
GSE360_DC_VS_MAC_L_DONOVANI_UP	200	0.412572	1.5979	0.0290698	0.0762125	0.506	4162	tags=29%, list=10%, signal=32%
GSE15330_HSC_VS_MEGAKARYOCYTE_ERYTHROID_PROGENITOR_IKAROS_KO_DN	199	0.380978	1.53201	0.0290698	0.0986625	0.586	4376	tags=27%, list=11%, signal=30%
GSE2706_UNSTIM_VS_8H_LPS_DC_DN	197	0.465972	1.72115	0.0291829	0.0429867	0.368	4340	tags=32%, list=11%, signal=36%
GSE9988_LPS_VS_VEHICLE_TREATED_MONOCYTE_DN	198	0.497036	1.74662	0.0292398	0.0372448	0.333	5263	tags=40%, list=13%, signal=46%
GSE6674_UNSTIM_VS_ANTI_IGM_STIM_BCELL_DN	136	0.343627	1.42266	0.0295858	0.138906	0.7	7225	tags=32%, list=18%, signal=38%
GSE2706_UNSTIM_VS_8H_R848_DC_UP	198	0.415263	1.66226	0.0296443	0.0573081	0.44	6272	tags=33%, list=16%, signal=39%
GSE41867_DAY6_VS_DAY15_LCMV_ARMSTRONG_EFFECTOR_CD8_TCELL_UP	195	0.423441	1.60898	0.029703	0.0726978	0.494	5670	tags=36%, list=14%, signal=42%
GSE2585_CTEC_VS_THYMIC_DC_DN	200	0.365076	1.52631	0.0297619	0.100433	0.595	4439	tags=28%, list=11%, signal=31%
GSE18791_UNSTIM_VS_NEWCATSLE_VIRUS_DC_6H_DN	195	0.595698	1.82624	0.0301811	0.0227971	0.244	5339	tags=51%, list=13%, signal=58%
GSE9988_LPS_VS_VEHICLE_TREATED_MONOCYTE_UP	195	0.48841	1.78242	0.0302457	0.030261	0.291	4055	tags=32%, list=10%, signal=36%
GSE26030_UNSTIM_VS_RESTIM_TH17_DAY5_POST_POLARIZATION_UP	180	0.415838	1.61827	0.0302457	0.069683	0.487	4448	tags=32%, list=11%, signal=35%
GSE37301_HEMATOPOIETIC_STEM_CELL_VS_CD4_TCELL_DN	146	0.357479	1.50436	0.0304183	0.108386	0.624	5395	tags=27%, list=13%, signal=31%
GSE17721_12H_VS_24H_GARDIQUIMOD_BMDC_UP	199	0.435366	1.67582	0.0305344	0.0548292	0.416	3781	tags=27%, list=9%, signal=30%
GSE6259_DEC205_POS_DC_VS_CD8_TCELL_DN	154	0.385425	1.54928	0.0307102	0.0935648	0.568	4958	tags=30%, list=12%, signal=34%
GSE360_LOW_DOSE_B_MALAYI_VS_M_TUBERCULOSIS_DC_DN	199	0.46892	1.7052	0.0311284	0.0469152	0.383	3524	tags=32%, list=9%, signal=35%
GSE24142_ADULT_VS_FETAL_DN2_THYMOCYTE_UP	199	0.404419	1.57194	0.0311284	0.0855387	0.541	4149	tags=27%, list=10%, signal=30%
GSE3982_EFF_MEMORY_CD4_TCELL_VS_NKCELL_DN	198	0.393253	1.5789	0.0311891	0.0832365	0.536	3668	tags=26%, list=9%, signal=28%
GSE360_L_MAJOR_VS_B_MALAYI_LOW_DOSE_DC_UP	198	0.393272	1.55429	0.0313725	0.0919187	0.562	4949	tags=31%, list=12%, signal=35%
GSE36888_UNTREATED_VS_IL2_TREATED_TCELL_17H_DN	199	0.466072	1.71814	0.0314961	0.0436856	0.371	5455	tags=38%, list=14%, signal=44%
GSE18791_CTRL_VS_NEWCASTLE_VIRUS_DC_12H_DN	198	0.511137	1.74307	0.0316832	0.0379328	0.335	6412	tags=47%, list=16%, signal=56%
KAECH_NAIVE_VS_DAY8_EFF_CD8_TCELL_DN	199	0.438416	1.63512	0.031746	0.0647203	0.463	3022	tags=25%, list=8%, signal=26%
GSE3337_CTRL_VS_4H_IFNG_IN_CD8POS_DC_UP	200	0.399058	1.53025	0.031746	0.0992569	0.588	3175	tags=25%, list=8%, signal=26%
GSE2585_CTEC_VS_MTEC_THYMUS_DN	199	0.368531	1.5337	0.0317757	0.0986231	0.585	4912	tags=27%, list=12%, signal=31%
GSE21670_UNTREATED_VS_TGFB_TREATED_STAT3_KO_CD4_TCELL_DN	199	0.448083	1.63078	0.0318949	0.0658915	0.468	2602	tags=26%, list=6%, signal=28%
GSE1791_CTRL_VS_NEUROMEDINU_IN_T_CELL_LINE_0.8H_DN	193	0.372455	1.5382	0.0318949	0.0973127	0.576	4724	tags=28%, list=12%, signal=32%
GSE12366_GC_VS_MEMORY_BCELL_DN	196	0.467692	1.67646	0.0320151	0.0548394	0.416	4713	tags=37%, list=12%, signal=41%
GSE4590_SMALL_VS_LARGE_PRE_BCELL_DN	160	0.423982	1.59479	0.0322581	0.0771457	0.512	5914	tags=36%, list=15%, signal=42%
GSE24634_NAIVE_CD4_TCELL_VS_DAY3_IL4_CONV_TREG_UP	198	0.429352	1.59647	0.0323194	0.0767982	0.509	4786	tags=33%, list=12%, signal=37%
GSE29164_DAY3_VS_DAY7_UNTREATED_MELANOMA_UP	195	0.411763	1.58233	0.0325671	0.0821585	0.532	3882	tags=29%, list=10%, signal=32%
GSE32255_UNSTIM_VS_4H_LPS_STIM_DC_DN	154	0.385531	1.51669	0.0325671	0.103392	0.61	4728	tags=31%, list=12%, signal=35%
GSE37301_PRO_BCELL_VS_CD4_TCELL_DN	164	0.390824	1.54371	0.0326923	0.0959669	0.571	4477	tags=29%, list=11%, signal=33%
GSE9006_1MONTH_VS_4MONTH_POST_TYPE_1_DIABETES_DX_PBMC_UP	197	0.382273	1.52281	0.0326923	0.101446	0.605	5712	tags=31%, list=14%, signal=36%
GSE16385_ROSIGLITAZONE_IL4_VS_IFNG_TNF_STIM_MACROPHAGE_DN	196	0.351951	1.48075	0.0327553	0.117103	0.65	5719	tags=29%, list=14%, signal=33%
GSE36078_WT_VS_IL1R_KO_LUNG_DC_UP	200	0.36777	1.52099	0.0328185	0.102094	0.605	5055	tags=29%, list=13%, signal=32%
KAECH_DAY15_EFF_VS_MEMORY_CD8_TCELL_DN	200	0.403526	1.5664	0.0330097	0.0873567	0.548	3751	tags=26%, list=9%, signal=29%
GSE22432_MULTIPOTENT_PROGENITOR_VS_CDC_UP	199	0.395502	1.56417	0.0331384	0.0880083	0.552	3465	tags=22%, list=9%, signal=24%
GSE11884_WT_VS_FURIN_KO_NAIVE_CD4_TCELL_UP	141	0.357613	1.45794	0.0331384	0.124611	0.675	6722	tags=37%, list=17%, signal=44%
GSE17974_IL4_AND_ANTI_IL12_VS_UNTREATED_1H_ACT_CD4_TCELL_DN	188	0.309414	1.41232	0.0331384	0.14383	0.717	4575	tags=21%, list=11%, signal=24%
GSE24574_BCL6_HIGH_TFH_VS_TFH_CD4_TCELL_DN	200	0.455085	1.68318	0.0332031	0.0531481	0.41	4764	tags=35%, list=12%, signal=39%
GSE14769_UNSTIM_VS_80MIN_LPS_BMDM_DN	198	0.489787	1.66772	0.0332031	0.0564312	0.43	3367	tags=32%, list=8%, signal=35%
GSE26030_TH1_VS_TH17_DAY5_POST_POLARIZATION_UP	200	0.517873	1.75772	0.0332681	0.0354548	0.317	4498	tags=40%, list=11%, signal=44%
KAECH_DAY8_EFF_VS_DAY15_EFF_CD8_TCELL_DN	200	0.38822	1.51551	0.0333333	0.103862	0.611	4828	tags=33%, list=12%, signal=37%
GSE2770_TGFB_AND_IL4_ACT_VS_ACT_CD4_TCELL_2H_DN	194	0.550866	1.76759	0.0333988	0.0331666	0.303	5223	tags=45%, list=13%, signal=52%
GSE9988_LOW_LPS_VS_VEHICLE_TREATED_MONOCYTE_UP	194	0.479263	1.70594	0.0333988	0.0469192	0.382	3906	tags=31%, list=10%, signal=35%
GSE3982_NEUTROPHIL_VS_CENT_MEMORY_CD4_TCELL_UP	200	0.447765	1.6047	0.0334646	0.074106	0.5	5273	tags=35%, list=13%, signal=40%
GSE18281_MEDULLARY_THYMOCYTE_VS_WHOLE_MEDULLA_THYMUS_UP	195	0.383626	1.54513	0.0335306	0.0952214	0.57	4673	tags=27%, list=12%, signal=30%
GSE13762_CTRL_VS_125_VITAMIND_DAY5_DC_UP	136	0.366851	1.50724	0.0335306	0.10703	0.619	7134	tags=38%, list=18%, signal=46%
GSE7460_TREG_VS_TCONV_ACT_WITH_TGFB_DN	199	0.417298	1.64099	0.0336634	0.0629549	0.457	5740	tags=34%, list=14%, signal=39%
GSE7219_WT_VS_NIK_NFKB2_KO_DC_UP	185	0.47354	1.68508	0.0339623	0.0528418	0.407	2915	tags=34%, list=7%, signal=37%
GSE11057_NAIVE_VS_MEMORY_CD4_TCELL_DN	198	0.457275	1.63824	0.0339623	0.0637208	0.459	2816	tags=27%, list=7%, signal=29%
GSE19923_E2A_KO_VS_E2A_AND_HEB_KO_DP_THYMOCYTE_DN	200	0.421399	1.6117	0.0340265	0.0720877	0.491	4141	tags=29%, list=10%, signal=33%
GSE26928_EFF_MEMORY_VS_CXCR5_POS_CD4_TCELL_UP	189	0.355291	1.51034	0.0340265	0.106158	0.616	4140	tags=21%, list=10%, signal=23%
GSE7831_UNSTIM_VS_CPG_STIM_PDC_1H_UP	200	0.436512	1.61758	0.0340909	0.0698048	0.487	5682	tags=37%, list=14%, signal=42%
GSE39556_UNTREATED_VS_3H_POLYIC_INJ_MOUSE_CD8A_DC_DN	200	0.440872	1.62251	0.0341556	0.0688817	0.485	3798	tags=30%, list=9%, signal=33%
GSE21360_NAIVE_VS_PRIMARY_MEMORY_CD8_TCELL_UP	173	0.425039	1.63136	0.0342205	0.0657967	0.468	3631	tags=28%, list=9%, signal=31%
GSE37301_HEMATOPOIETIC_STEM_CELL_VS_RAG2_KO_NK_CELL_DN	183	0.445918	1.61468	0.0342857	0.070914	0.489	3508	tags=29%, list=9%, signal=32%
GSE22935_UNSTIM_VS_48H_MBOVIS_BCG_STIM_MACROPHAGE_UP	199	0.339446	1.46918	0.0343511	0.120587	0.669	5830	tags=27%, list=14%, signal=31%
GSE45365_WT_VS_IFNAR_KO_CD8A_DC_DN	199	0.456805	1.65873	0.0344828	0.0579234	0.445	3525	tags=32%, list=9%, signal=35%
GSE40666_STAT1_KO_VS_STAT4_KO_CD8_TCELL_DN	181	0.33824	1.46251	0.0345489	0.122609	0.672	5673	tags=27%, list=14%, signal=31%
GSE34006_WT_VS_A2AR_KO_TREG_DN	200	0.509454	1.76996	0.0346821	0.0326618	0.303	5178	tags=40%, list=13%, signal=46%
GSE10211_UV_INACT_SENDAI_VS_LIVE_SENDAI_VIRUS_TRACHEAL_EPITHELIAL_CELLS_DN	164	0.412961	1.5865	0.0348162	0.0801724	0.528	2471	tags=23%, list=6%, signal=24%
GSE21927_SPLEEN_VS_TUMOR_MONOCYTE_C57BL6_UP	190	0.328815	1.41848	0.0348162	0.141196	0.705	3819	tags=20%, list=9%, signal=22%
GSE31082_DN_VS_CD8_SP_THYMOCYTE_DN	200	0.452168	1.64634	0.0350877	0.061755	0.454	5531	tags=38%, list=14%, signal=43%
GSE23505_IL6_IL1_IL23_VS_IL6_IL1_TGFB_TREATED_CD4_TCELL_UP	200	0.400082	1.56923	0.0350877	0.0864942	0.546	4809	tags=32%, list=12%, signal=36%
GSE42021_CD24HI_VS_CD24LOW_TREG_THYMUS_DN	199	0.506582	1.72538	0.0351562	0.041982	0.358	5354	tags=42%, list=13%, signal=48%
GSE9650_NAIVE_VS_EXHAUSTED_CD8_TCELL_DN	200	0.379362	1.51682	0.0352251	0.103655	0.61	4452	tags=25%, list=11%, signal=27%
GSE24492_LYVE_NEG_VS_POS_MACROPHAGE_DN	200	0.369952	1.53242	0.0352941	0.0985665	0.586	3512	tags=24%, list=9%, signal=26%
GSE9988_LPS_VS_LPS_AND_ANTI_TREM1_MONOCYTE_UP	198	0.467169	1.62835	0.0353635	0.0665784	0.474	3906	tags=35%, list=10%, signal=38%
GSE6259_33D1_POS_DC_VS_CD4_TCELL_DN	176	0.482011	1.65667	0.0353817	0.0584318	0.446	4819	tags=40%, list=12%, signal=45%
GSE29949_MICROGLIA_BRAIN_VS_CD8_POS_DC_SPLEEN_DN	200	0.338556	1.44419	0.0353817	0.13052	0.686	5051	tags=24%, list=13%, signal=27%
GSE40274_FOXP3_VS_FOXP3_AND_PBX1_TRANSDUCED_ACTIVATED_CD4_TCELL_UP	200	0.466009	1.67913	0.0354478	0.0541396	0.414	4406	tags=34%, list=11%, signal=38%
GSE37605_TREG_VS_TCONV_NOD_FOXP3_FUSION_GFP_UP	150	0.430014	1.62752	0.0356436	0.0669169	0.478	7526	tags=45%, list=19%, signal=56%
GSE21927_SPLEEN_VS_C26GM_TUMOR_MONOCYTE_BALBC_UP	187	0.331946	1.42268	0.0356436	0.139023	0.7	5840	tags=26%, list=15%, signal=31%
GSE22611_NOD2_TRANSDUCED_VS_CTRL_HEK293T_STIMULATED_WITH_MDP_2H_UP	177	0.450644	1.59464	0.0356473	0.0771186	0.512	4138	tags=34%, list=10%, signal=38%
GSE17721_ALL_VS_24H_PAM3CSK4_BMDC_UP	200	0.426496	1.64323	0.0357143	0.0623709	0.454	4828	tags=33%, list=12%, signal=37%
GSE30083_SP1_VS_SP3_THYMOCYTE_DN	199	0.390441	1.57566	0.0359168	0.0843215	0.539	6882	tags=35%, list=17%, signal=42%
GSE13306_TREG_VS_TCONV_LAMINA_PROPRIA_DN	200	0.361408	1.49915	0.036	0.110349	0.629	4762	tags=26%, list=12%, signal=29%
GSE16385_UNTREATED_VS_12H_ROSIGLITAZONE_IFNG_TNF_TREATED_MACROPHAGE_UP	200	0.371957	1.50969	0.0361905	0.106205	0.618	4856	tags=28%, list=12%, signal=32%
GSE25123_WT_VS_PPARG_KO_MACROPHAGE_IL4_STIM_DN	200	0.434657	1.5808	0.0362595	0.0825939	0.533	2158	tags=22%, list=5%, signal=23%
GSE22886_UNSTIM_VS_IL2_STIM_NKCELL_UP	195	0.4566	1.63916	0.0366089	0.0635835	0.458	5159	tags=34%, list=13%, signal=39%
GSE9509_LPS_VS_LPS_AND_IL10_STIM_IL10_KO_MACROPHAGE_20MIN_UP	195	0.421424	1.59588	0.0366089	0.0769872	0.511	5807	tags=35%, list=14%, signal=41%
GSE2770_IL4_ACT_VS_ACT_CD4_TCELL_48H_DN	200	0.414242	1.56739	0.0366089	0.0870274	0.548	4457	tags=30%, list=11%, signal=34%
GSE17812_WT_VS_THPOK_KO_MEMORY_CD8_TCELL_UP	197	0.392525	1.51104	0.0366089	0.105845	0.614	4004	tags=27%, list=10%, signal=30%
GSE13229_MATURE_VS_INTMATURE_NKCELL_UP	200	0.334824	1.47876	0.0366089	0.117504	0.655	5535	tags=25%, list=14%, signal=28%
GSE38681_WT_VS_LYL1_KO_LYMPHOID_PRIMED_MULTIPOTENT_PROGENITOR_DN	200	0.526689	1.74588	0.0367505	0.037303	0.333	4255	tags=40%, list=11%, signal=45%
GSE22886_NAIVE_CD8_TCELL_VS_NKCELL_UP	198	0.401866	1.53979	0.0367505	0.0966841	0.574	3524	tags=26%, list=9%, signal=28%
GSE360_L_MAJOR_VS_B_MALAYI_HIGH_DOSE_MAC_UP	200	0.381786	1.5097	0.0367505	0.106318	0.618	4160	tags=29%, list=10%, signal=32%
GSE34006_WT_VS_A2AR_KO_TREG_UP	200	0.386672	1.56457	0.0368217	0.0878816	0.552	5254	tags=30%, list=13%, signal=34%
GSE6269_E_COLI_VS_STREP_PNEUMO_INF_PBMC_DN	169	0.393524	1.5722	0.0371057	0.085506	0.541	5060	tags=31%, list=13%, signal=36%
GSE3039_CD4_TCELL_VS_B1_BCELL_UP	200	0.40593	1.60527	0.0371094	0.0740322	0.499	3928	tags=28%, list=10%, signal=31%
GSE4142_NAIVE_VS_MEMORY_BCELL_UP	199	0.356502	1.46651	0.0372549	0.121626	0.669	5484	tags=27%, list=14%, signal=31%
GSE30971_WBP7_HET_VS_KO_MACROPHAGE_2H_LPS_STIM_DN	198	0.44905	1.63064	0.0373281	0.0658586	0.469	4130	tags=31%, list=10%, signal=35%
GSE46242_CTRL_VS_EGR2_DELETED_ANERGIC_TH1_CD4_TCELL_UP	196	0.404828	1.58192	0.0374532	0.0822899	0.533	5367	tags=32%, list=13%, signal=37%
KAECH_DAY8_EFF_VS_MEMORY_CD8_TCELL_DN	199	0.414623	1.55792	0.0376984	0.0903534	0.555	4515	tags=32%, list=11%, signal=36%
GSE22935_UNSTIM_VS_12H_MBOVIS_BCG_STIM_MYD88_KO_MACROPHAGE_UP	200	0.356455	1.47626	0.0376984	0.117864	0.656	4958	tags=29%, list=12%, signal=33%
GSE13547_WT_VS_ZFX_KO_BCELL_ANTI_IGM_STIM_12H_DN	157	0.422764	1.57991	0.0377359	0.0827653	0.535	4118	tags=26%, list=10%, signal=29%
GSE14699_DELETIONAL_TOLERANCE_VS_ACTIVATED_CD8_TCELL_UP	180	0.42184	1.59118	0.0378788	0.0784249	0.519	2816	tags=23%, list=7%, signal=24%
GSE16697_CD4_TCELL_VS_TFH_CD4_TCELL_DN	200	0.402632	1.5687	0.0380228	0.0865721	0.547	4657	tags=28%, list=12%, signal=32%
GSE13522_CTRL_VS_T_CRUZI_G_STRAIN_INF_SKIN_DN	138	0.38551	1.47894	0.0381679	0.117638	0.655	3845	tags=28%, list=10%, signal=30%
GSE46242_TH1_VS_ANERGIC_TH1_CD4_TCELL_WITH_EGR2_DELETED_UP	199	0.406705	1.58981	0.0382409	0.0789794	0.523	3524	tags=27%, list=9%, signal=30%
GSE5542_UNTREATED_VS_IFNA_TREATED_EPITHELIAL_CELLS_24H_UP	200	0.470714	1.63838	0.0383877	0.0637535	0.458	4237	tags=32%, list=11%, signal=36%
GSE19941_UNSTIM_VS_LPS_STIM_IL10_KO_MACROPHAGE_UP	199	0.364259	1.49364	0.0383877	0.112489	0.641	3495	tags=24%, list=9%, signal=26%
GSE26495_PD1HIGH_VS_PD1LOW_CD8_TCELL_DN	185	0.356629	1.48986	0.0389864	0.113966	0.645	6606	tags=35%, list=16%, signal=42%
GSE32034_LY6C_HIGH_VS_LOW_ROSIGLIZATONE_TREATED_MONOCYTE_DN	200	0.407828	1.56924	0.0390625	0.0866027	0.546	5252	tags=33%, list=13%, signal=37%
GSE36078_WT_VS_IL1R_KO_LUNG_DC_DN	200	0.393888	1.5428	0.0391389	0.0962792	0.571	3669	tags=24%, list=9%, signal=26%
GSE36888_UNTREATED_VS_IL2_TREATED_TCELL_17H_UP	198	0.437537	1.61925	0.0391791	0.0698436	0.487	5211	tags=36%, list=13%, signal=42%
GSE17721_CPG_VS_GARDIQUIMOD_16H_BMDC_UP	199	0.361231	1.49978	0.0394477	0.110339	0.629	6291	tags=30%, list=16%, signal=36%
GSE1112_OT1_CD8AB_VS_HY_CD8AA_THYMOCYTE_RTOC_CULTURE_UP	180	0.317232	1.39419	0.0394477	0.15239	0.738	5623	tags=29%, list=14%, signal=34%
GSE34156_UNTREATED_VS_24H_NOD2_LIGAND_TREATED_MONOCYTE_DN	199	0.487619	1.70424	0.0395257	0.0472064	0.385	5033	tags=38%, list=13%, signal=43%
GSE23568_ID3_TRANSDUCED_VS_ID3_KO_CD8_TCELL_DN	200	0.463006	1.63273	0.0396226	0.0652258	0.466	4101	tags=35%, list=10%, signal=39%
GSE16755_CTRL_VS_IFNA_TREATED_MAC_DN	198	0.517303	1.69901	0.0396825	0.0487967	0.392	4457	tags=39%, list=11%, signal=44%
GSE2585_CTEC_VS_THYMIC_MACROPHAGE_UP	200	0.370249	1.50123	0.0397614	0.109902	0.629	4122	tags=29%, list=10%, signal=32%
GSE17721_12H_VS_24H_LPS_BMDC_UP	200	0.419193	1.5334	0.04	0.0985721	0.586	5738	tags=32%, list=14%, signal=37%
GSE11057_CD4_CENT_MEM_VS_PBMC_UP	197	0.449219	1.60941	0.0400763	0.0725771	0.493	3988	tags=31%, list=10%, signal=35%
GSE24210_TCONV_VS_TREG_UP	200	0.362206	1.47988	0.040153	0.117358	0.652	5333	tags=33%, list=13%, signal=37%
GSE5589_LPS_VS_LPS_AND_IL10_STIM_MACROPHAGE_180MIN_UP	200	0.405117	1.56734	0.0402299	0.0869369	0.548	4024	tags=28%, list=10%, signal=31%
GSE7768_OVA_ALONE_VS_OVA_WITH_LPS_IMMUNIZED_MOUSE_WHOLE_SPLEEN_6H_DN	170	0.479577	1.64217	0.0403071	0.0626684	0.455	3906	tags=35%, list=10%, signal=38%
GSE22886_NAIVE_TCELL_VS_NEUTROPHIL_DN	198	0.36607	1.48031	0.040367	0.117175	0.651	5496	tags=30%, list=14%, signal=34%
GSE18791_CTRL_VS_NEWCASTLE_VIRUS_DC_4H_DN	189	0.504465	1.71432	0.040619	0.0447512	0.377	5055	tags=42%, list=13%, signal=48%
GSE25123_CTRL_VS_IL4_STIM_MACROPHAGE_UP	199	0.411414	1.56963	0.040619	0.0866056	0.544	4066	tags=29%, list=10%, signal=32%
GSE29949_DC_BRAIN_VS_MONOCYTE_BONE_MARROW_DN	198	0.350787	1.48307	0.0408922	0.115994	0.648	3986	tags=21%, list=10%, signal=23%
GSE7348_UNSTIM_VS_LPS_STIM_MACROPHAGE_DN	169	0.476407	1.64214	0.0410959	0.0625904	0.455	3454	tags=30%, list=9%, signal=33%
GSE37301_MULTIPOTENT_PROGENITOR_VS_COMMON_LYMPHOID_PROGENITOR_UP	168	0.420127	1.59913	0.0412758	0.0760092	0.503	3545	tags=27%, list=9%, signal=29%
GSE32986_UNSTIM_VS_GMCSF_AND_CURDLAN_LOWDOSE_STIM_DC_DN	200	0.469881	1.64603	0.0414313	0.0617854	0.454	4764	tags=35%, list=12%, signal=39%
GSE12366_NAIVE_VS_MEMORY_BCELL_UP	194	0.389095	1.53175	0.0414313	0.0986946	0.586	5276	tags=33%, list=13%, signal=38%
GSE2585_AIRE_KO_VS_WT_CD80_LOW_MTEC_DN	200	0.388041	1.55308	0.0417495	0.0921733	0.564	4138	tags=29%, list=10%, signal=32%
GSE37416_12H_VS_24H_F_TULARENSIS_LVS_NEUTROPHIL_UP	199	0.4697	1.68226	0.0418251	0.0533209	0.41	3781	tags=34%, list=9%, signal=38%
GSE29617_DAY3_VS_DAY7_TIV_FLU_VACCINE_PBMC_2008_UP	188	0.396875	1.55334	0.0418251	0.0922493	0.564	4188	tags=27%, list=10%, signal=30%
GSE5679_PPARG_LIGAND_ROSIGLITAZONE_VS_ROSIGLITAZONE_AND_RARA_AGONIST_AM580_TREATED_DC_DN	200	0.395876	1.54787	0.0419048	0.0940464	0.569	4408	tags=26%, list=11%, signal=30%
GSE16266_CTRL_VS_LPS_STIM_MEF_UP	198	0.46766	1.64449	0.0419847	0.0618863	0.454	3986	tags=31%, list=10%, signal=34%
GSE11057_NAIVE_VS_CENT_MEMORY_CD4_TCELL_DN	199	0.446955	1.59209	0.0419847	0.0780554	0.516	2473	tags=25%, list=6%, signal=26%
GSE26488_CTRL_VS_PEPTIDE_INJECTION_OT2_THYMOCYTE_DN	183	0.477872	1.65738	0.0422265	0.0582982	0.446	2915	tags=32%, list=7%, signal=35%
GSE1925_CTRL_VS_IFNG_PRIMED_MACROPHAGE_24H_IFNG_STIM_UP	200	0.384778	1.51671	0.0422265	0.103497	0.61	3350	tags=23%, list=8%, signal=25%
GSE10239_NAIVE_VS_DAY4.5_EFF_CD8_TCELL_UP	198	0.433799	1.61951	0.0422535	0.0698333	0.486	4477	tags=33%, list=11%, signal=37%
GSE45881_CXCR6HI_VS_CXCR1LO_COLONIC_LAMINA_PROPRIA_DN	198	0.394544	1.55262	0.042471	0.0923289	0.564	5354	tags=33%, list=13%, signal=38%
GSE360_T_GONDII_VS_M_TUBERCULOSIS_MAC_DN	198	0.366626	1.46554	0.0425532	0.121805	0.67	5026	tags=29%, list=12%, signal=33%
GSE7460_CTRL_VS_TGFB_TREATED_ACT_FOXP3_HET_TCONV_DN	200	0.383871	1.52655	0.0426357	0.1004	0.595	5333	tags=30%, list=13%, signal=34%
GSE15624_3H_VS_6H_HALOFUGINONE_TREATED_CD4_TCELL_UP	171	0.443846	1.58735	0.042885	0.0799421	0.528	3955	tags=32%, list=10%, signal=35%
GSE7831_UNSTIM_VS_INFLUENZA_STIM_PDC_1H_UP	200	0.377323	1.52833	0.042885	0.0997431	0.59	4490	tags=28%, list=11%, signal=31%
GSE13229_IMM_VS_MATURE_NKCELL_DN	199	0.381882	1.49796	0.042885	0.110913	0.632	3939	tags=25%, list=10%, signal=28%
GSE19401_NAIVE_VS_IMMUNIZED_MOUSE_PLN_FOLLICULAR_DC_DN	200	0.472133	1.66439	0.0429688	0.0569764	0.435	4096	tags=31%, list=10%, signal=34%
GSE22886_NAIVE_BCELL_VS_MONOCYTE_DN	200	0.496715	1.72566	0.0431373	0.041966	0.358	5035	tags=40%, list=13%, signal=45%
GSE22589_HEALTHY_VS_SIV_INFECTED_DC_UP	199	0.469189	1.70581	0.0431373	0.0467809	0.382	4673	tags=34%, list=12%, signal=38%
GSE30153_LUPUS_VS_HEALTHY_DONOR_BCELL_DN	198	0.35731	1.47856	0.043152	0.117399	0.655	3503	tags=23%, list=9%, signal=25%
GSE17186_NAIVE_VS_CD21LOW_TRANSITIONAL_BCELL_DN	200	0.413755	1.53314	0.043222	0.0984823	0.586	5613	tags=34%, list=14%, signal=39%
GSE36078_UNTREATED_VS_AD5_INF_MOUSE_LUNG_DC_UP	200	0.330398	1.43842	0.0432331	0.132758	0.692	6014	tags=27%, list=15%, signal=32%
GSE3982_DC_VS_NKCELL_DN	197	0.390975	1.52672	0.0433071	0.100415	0.595	3121	tags=22%, list=8%, signal=24%
GSE1925_CTRL_VS_IFNG_PRIMED_MACROPHAGE_3H_IFNG_STIM_DN	128	0.332114	1.39468	0.0433925	0.152663	0.737	6706	tags=28%, list=17%, signal=34%
GSE18281_CORTEX_VS_MEDULLA_THYMUS_DN	195	0.388719	1.52946	0.0434783	0.0995287	0.59	5188	tags=29%, list=13%, signal=33%
GSE18791_CTRL_VS_NEWCASTLE_VIRUS_DC_10H_DN	200	0.537153	1.72584	0.0436508	0.0419768	0.357	6454	tags=50%, list=16%, signal=59%
GSE34156_UNTREATED_VS_24H_TLR1_TLR2_LIGAND_TREATED_MONOCYTE_UP	193	0.356649	1.48588	0.0437262	0.114749	0.647	4417	tags=22%, list=11%, signal=25%
GSE16697_CD4_TCELL_VS_TFH_CD4_TCELL_UP	200	0.415017	1.56763	0.0438931	0.0869885	0.548	3237	tags=26%, list=8%, signal=28%
GSE9601_UNTREATED_VS_NFKB_INHIBITOR_TREATED_HCMV_INF_MONOCYTE_UP	165	0.360666	1.4816	0.0438931	0.116656	0.649	3926	tags=22%, list=10%, signal=25%
GSE37301_MULTIPOTENT_PROGENITOR_VS_CD4_TCELL_UP	171	0.432781	1.61015	0.0440613	0.0723269	0.493	4488	tags=32%, list=11%, signal=35%
GSE37301_MULTIPOTENT_PROGENITOR_VS_GRAN_MONO_PROGENITOR_DN	200	0.442049	1.63418	0.0444874	0.0648498	0.463	3946	tags=32%, list=10%, signal=35%
GSE9960_GRAM_NEG_VS_GRAM_POS_SEPSIS_PBMC_UP	197	0.442991	1.66454	0.0445736	0.0570175	0.435	4431	tags=35%, list=11%, signal=39%
GSE15930_NAIVE_VS_48H_IN_VITRO_STIM_CD8_TCELL_UP	198	0.375324	1.48658	0.0445736	0.114394	0.646	3679	tags=27%, list=9%, signal=29%
GSE22886_TH1_VS_TH2_48H_ACT_UP	198	0.342733	1.46258	0.0446602	0.12268	0.672	3886	tags=22%, list=10%, signal=24%
GSE8384_CTRL_VS_B_ABORTUS_4H_MAC_CELL_LINE_DN	200	0.400258	1.54336	0.0447471	0.096054	0.571	4193	tags=29%, list=10%, signal=32%
GSE10463_CD40L_AND_VA347_VS_CD40L_IN_DC_DN	182	0.342602	1.48677	0.0447471	0.11451	0.645	6541	tags=31%, list=16%, signal=37%
GSE3720_UNSTIM_VS_LPS_STIM_VD2_GAMMADELTA_TCELL_UP	167	0.433523	1.60663	0.0450098	0.0736328	0.498	3189	tags=25%, list=8%, signal=27%
GSE22432_CDC_VS_COMMON_DC_PROGENITOR_UP	200	0.435373	1.5881	0.045283	0.0797211	0.528	3143	tags=25%, list=8%, signal=26%
GSE2706_2H_VS_8H_LPS_STIM_DC_UP	195	0.373815	1.51954	0.0454545	0.102211	0.605	5526	tags=32%, list=14%, signal=37%
GSE9988_LOW_LPS_VS_CTRL_TREATED_MONOCYTE_UP	196	0.465963	1.6756	0.0456274	0.0548282	0.417	5909	tags=38%, list=15%, signal=44%
GSE37301_CD4_TCELL_VS_GRANULOCYTE_MONOCYTE_PROGENITOR_UP	161	0.3831	1.48973	0.0456274	0.113933	0.645	3822	tags=27%, list=9%, signal=29%
GSE14350_IL2RB_KO_VS_WT_TREG_DN	200	0.400174	1.56154	0.0457256	0.0889346	0.554	4376	tags=24%, list=11%, signal=27%
GSE14769_UNSTIM_VS_120MIN_LPS_BMDM_DN	200	0.457986	1.5949	0.0461538	0.077303	0.512	4920	tags=37%, list=12%, signal=42%
GSE10240_IL22_VS_IL22_AND_IL17_STIM_PRIMARY_BRONCHIAL_EPITHELIAL_CELLS_UP	200	0.410042	1.56219	0.0461538	0.0886589	0.553	5145	tags=33%, list=13%, signal=38%
GSE3565_CTRL_VS_LPS_INJECTED_SPLENOCYTES_DN	175	0.394601	1.52458	0.0461538	0.101051	0.602	4477	tags=30%, list=11%, signal=34%
GSE360_DC_VS_MAC_T_GONDII_DN	199	0.40727	1.57505	0.0462777	0.0843102	0.539	5254	tags=33%, list=13%, signal=38%
GSE32901_NAIVE_VS_TH1_CD4_TCELL_UP	131	0.388249	1.52376	0.0463822	0.101224	0.605	3372	tags=26%, list=8%, signal=28%
GSE6269_FLU_VS_STAPH_AUREUS_INF_PBMC_DN	166	0.480963	1.67193	0.0465116	0.0557646	0.42	4485	tags=37%, list=11%, signal=42%
GSE12392_WT_VS_IFNB_KO_CD8A_NEG_SPLEEN_DC_DN	200	0.447428	1.59839	0.0468165	0.0761788	0.506	4376	tags=30%, list=11%, signal=33%
GSE5455_HEALTHY_VS_TUMOR_BEARING_MOUSE_SPLEEN_MONOCYTE_24H_INCUBATION_DN	197	0.411475	1.58191	0.0468165	0.082183	0.533	3700	tags=27%, list=9%, signal=30%
GSE36009_UNSTIM_VS_LPS_STIM_DC_UP	200	0.408535	1.52872	0.046875	0.099732	0.59	3262	tags=25%, list=8%, signal=27%
GSE37533_UNTREATED_VS_PIOGLIZATONE_TREATED_CD4_TCELL_PPARG1_AND_FOXP3_TRASDUCED_DN	200	0.433095	1.57816	0.0474383	0.0833942	0.537	5909	tags=35%, list=15%, signal=41%
GSE369_PRE_VS_POST_IL6_INJECTION_SOCS3_KO_LIVER_DN	200	0.494383	1.6807	0.0476191	0.0537193	0.412	5761	tags=41%, list=14%, signal=48%
GSE27859_MACROPHAGE_VS_CD11C_INT_F480_INT_DC_UP	171	0.398136	1.51533	0.0476191	0.103745	0.611	4162	tags=29%, list=10%, signal=32%
GSE29618_BCELL_VS_MONOCYTE_UP	195	0.462855	1.63098	0.0477099	0.0658799	0.468	5247	tags=42%, list=13%, signal=48%
GSE17186_NAIVE_VS_CD21LOW_TRANSITIONAL_BCELL_CORD_BLOOD_UP	198	0.397113	1.49356	0.0479846	0.112426	0.641	4485	tags=28%, list=11%, signal=31%
GSE10273_HIGH_VS_LOW_IL7_TREATED_IRF4_8_NULL_PRE_BCELL_DN	198	0.421475	1.54653	0.0480769	0.0946134	0.569	4339	tags=28%, list=11%, signal=32%
GSE3337_CTRL_VS_16H_IFNG_IN_CD8POS_DC_DN	199	0.451185	1.62123	0.0481928	0.0693939	0.485	4362	tags=31%, list=11%, signal=35%
GSE25502_WT_VS_KLF13_KO_THYMIC_MEMORY_LIKE_CD8_TCELL_DN	185	0.327513	1.43117	0.0482897	0.13644	0.696	5800	tags=26%, list=14%, signal=31%
GSE19941_LPS_VS_LPS_AND_IL10_STIM_IL10_KO_NFKBP50_KO_MACROPHAGE_DN	199	0.392135	1.53741	0.0484171	0.0973319	0.578	4625	tags=30%, list=11%, signal=34%
GSE40274_GATA1_VS_FOXP3_AND_GATA1_TRANSDUCED_ACTIVATED_CD4_TCELL_UP	200	0.425418	1.54195	0.0485437	0.0964501	0.573	5784	tags=36%, list=14%, signal=42%
GSE36392_TYPE_2_MYELOID_VS_NEUTROPHIL_IL25_TREATED_LUNG_UP	200	0.390996	1.52153	0.0487805	0.101875	0.605	5278	tags=32%, list=13%, signal=36%
GSE7219_WT_VS_NIK_NFKB2_KO_DC_DN	169	0.469161	1.60774	0.0489642	0.0732414	0.496	3302	tags=32%, list=8%, signal=35%
GSE16385_ROSIGLITAZONE_IFNG_TNF_VS_IL4_STIM_MACROPHAGE_UP	200	0.413884	1.5532	0.0489642	0.0922173	0.564	3906	tags=29%, list=10%, signal=33%
GSE28783_CTRL_ANTI_MIR_VS_UNTREATED_ATHEROSCLEROSIS_MACROPHAGE_DN	199	0.359035	1.47167	0.0491159	0.119389	0.661	4920	tags=29%, list=12%, signal=32%
GSE12505_WT_VS_E2_2_HET_PDC_UP	131	0.34981	1.42396	0.0492126	0.138766	0.698	7029	tags=35%, list=17%, signal=42%
GSE3337_CTRL_VS_4H_IFNG_IN_CD8POS_DC_DN	200	0.426677	1.56989	0.0494071	0.0865729	0.543	3312	tags=28%, list=8%, signal=30%
GSE37301_HEMATOPOIETIC_STEM_CELL_VS_RAG2_KO_NK_CELL_UP	174	0.415298	1.51821	0.0494071	0.102923	0.608	3612	tags=24%, list=9%, signal=26%
GSE21360_NAIVE_VS_TERTIARY_MEMORY_CD8_TCELL_DN	200	0.39279	1.53592	0.0495049	0.0976476	0.581	4620	tags=30%, list=11%, signal=34%
GSE7348_UNSTIM_VS_TOLERIZED_AND_LPS_STIM_MACROPHAGE_DN	160	0.452398	1.59827	0.0495238	0.0761258	0.506	5339	tags=34%, list=13%, signal=39%
GSE17721_12H_VS_24H_CPG_BMDC_UP	199	0.371125	1.44061	0.0496032	0.132048	0.691	4439	tags=26%, list=11%, signal=29%
GSE3982_BCELL_VS_TH1_UP	198	0.389968	1.51475	0.0496183	0.10389	0.613	4656	tags=32%, list=12%, signal=36%
GSE5503_MLN_DC_VS_SPLEEN_DC_ACTIVATED_ALLOGENIC_TCELL_UP	200	0.400864	1.52043	0.05	0.101985	0.605	4906	tags=32%, list=12%, signal=36%

## Sheet: s7
Supplementary Table 7: Drug sensitivity analysis of BRCA patients
sample	group	Camptothecin_1003	Vinblastine_1004	Cisplatin_1005	Cytarabine_1006	Docetaxel_1007	Gefitinib_1010	Navitoclax_1011	Vorinostat_1012	Nilotinib_1013	Olaparib_1017	Axitinib_1021	AZD7762_1022	SB216763_1025	KU-55933_1030	Afatinib_1032	Staurosporine_1034	PLX-4720_1036	NU7441_1038	Doramapimod_1042	Wee1 Inhibitor_1046	Nutlin-3a (-)_1047	Mirin_1048	PD173074_1049	ZM447439_1050	Alisertib_1051	RO-3306_1052	MK-2206_1053	Palbociclib_1054	Dactolisib_1057	Pictilisib_1058	AZD8055_1059	PD0325901_1060	Obatoclax Mesylate_1068	5-Fluorouracil_1073	Dasatinib_1079	Paclitaxel_1080	Crizotinib_1083	Rapamycin_1084	Sorafenib_1085	BI-2536_1086	Irinotecan_1088	Oxaliplatin_1089	BMS-536924_1091	GSK1904529A_1093	Tozasertib_1096	PF-4708671_1129	PRIMA-1MET_1131	Erlotinib_1168
TCGA.4H.AAAK	Highrisk	2.27544	0.540047	8.25492	6.29773	-0.113586	8.13922	6.56216	6.37847	8.36678	8.92076	7.80607	4.74586	10.1086	9.44612	6.52401	0.893453	8.79021	7.43652	9.57386	6.6556	9.23241	9.24377	8.68162	7.96713	5.89509	7.78625	7.6819	7.98842	2.96234	5.74597	4.70231	5.35158	6.17392	9.16228	5.11378	1.2328	7.89317	2.455	7.45663	5.19815	7.36365	8.62104	6.77965	9.18707	7.53431	8.76369	8.7162	7.69621
TCGA.5T.A9QA	Highrisk	2.26193	0.42506	7.57955	5.28881	-0.174558	8.13457	6.57483	6.17195	7.49093	9.29694	8.42507	5.38859	10.7313	9.74091	6.78584	2.82329	9.41825	8.17759	9.90034	6.54054	9.37814	9.56037	8.45709	8.27197	7.22596	8.36511	7.67605	7.42355	2.59071	5.96415	4.88451	5.38851	6.07175	8.44877	7.85545	1.3911	8.33589	1.86592	6.85885	5.43312	7.09296	7.87458	7.18268	8.3273	8.4537	8.8619	8.48572	7.6423
TCGA.A1.A0SB	Highrisk	2.38422	0.709172	8.45339	6.17625	-0.0666527	7.63926	6.44205	6.27675	9.00533	9.18136	7.94383	4.63252	10.3406	9.54082	6.39456	0.872218	8.82526	7.60686	9.8261	6.75854	9.12212	9.16256	8.49696	7.8295	5.36575	7.77632	7.75674	8.43523	3.09909	5.62586	5.07893	4.80413	6.20637	10.5474	5.76857	1.68894	7.60254	3.08254	7.52011	3.37483	7.40264	9.13525	6.31647	9.34233	7.05727	9.26738	9.59457	7.44336
TCGA.A1.A0SD	Highrisk	2.5867	1.76073	8.46041	7.18534	0.925464	8.34991	7.50817	6.9	9.08462	9.39422	8.2474	5.74261	10.0903	9.45657	6.98933	2.10801	9.51035	7.47666	9.35348	7.24904	9.60933	9.743	9.12496	8.01918	6.93526	7.79594	8.19424	9.27303	3.5739	6.60773	4.87289	5.58843	6.32004	9.9072	6.67228	2.72683	8.46064	3.0194	7.99902	5.52546	7.65745	9.18351	7.2119	9.49007	7.99464	9.22024	9.61927	7.86259
TCGA.A1.A0SG	Highrisk	3.63466	1.28231	9.63953	7.55124	0.689208	8.14951	6.92907	6.33396	8.54825	9.75859	8.22127	5.36966	10.2462	9.48781	6.77708	1.91974	9.50715	7.41817	9.31128	7.25633	9.58889	9.7656	9.29181	8.06126	7.64878	7.90569	7.73568	8.54641	3.38713	6.26493	4.73798	6.19746	6.50949	9.83492	6.14701	2.45123	8.64426	2.85509	7.90438	5.93984	8.56552	9.03684	7.07727	9.26459	8.31581	8.8605	9.5165	7.58848
TCGA.A1.A0SH	Highrisk	2.85944	1.63115	8.59255	6.99643	0.605556	8.03546	7.63952	6.90841	9.32685	9.35093	8.03398	5.47702	9.93572	9.24426	6.73038	1.15061	9.07409	6.85475	9.35943	7.77933	8.77406	9.7672	8.82424	7.93875	6.68458	7.14749	8.02428	8.8725	3.27015	6.28031	4.72767	5.38664	6.43044	10.3331	5.22245	2.4236	8.542	2.9742	8.07846	4.49251	7.95758	9.43362	6.87397	9.84759	7.62294	8.86164	9.84099	7.56193
TCGA.A1.A0SI	Highrisk	1.96901	0.536626	7.37597	6.45051	-0.0862352	7.88804	6.90444	6.26904	8.4967	8.68183	7.40742	4.4584	9.92993	9.21931	6.41116	0.965841	8.73115	6.95198	9.29493	6.86823	9.43479	9.3956	8.49382	7.66973	6.53188	7.00553	7.12405	8.58621	2.57087	5.80007	4.60561	5.16506	6.53058	8.96086	5.66894	1.31729	7.80586	2.01622	7.79553	5.01313	6.81481	8.49306	7.03133	9.26239	7.05247	8.34193	8.86804	7.56327
TCGA.A1.A0SJ	Highrisk	3.8898	3.41341	10.0588	8.54064	2.35679	8.80507	6.78821	7.21093	9.72661	10.5184	8.68194	6.1364	10.3915	9.53796	7.41296	3.11127	10.5365	7.58072	9.62448	8.21423	10.881	10.7564	9.82782	8.1069	8.50067	7.90303	9.06795	9.91709	4.42576	7.54146	4.94441	6.04867	6.67222	10.8496	6.91294	5.19511	9.1076	3.53119	8.45168	5.36439	9.20929	10.0221	7.59109	10.1361	8.46707	9.39676	10.0167	8.15011
TCGA.A1.A0SK	Highrisk	0.712834	-0.019704	6.22973	4.25928	-0.416449	8.63009	3.41359	5.77084	8.30904	7.97039	7.38844	3.75835	10.6988	9.5511	7.18742	1.34744	9.16018	7.46246	9.68467	5.38005	11.032	9.5669	8.38629	7.68899	4.04079	7.1382	8.12027	8.75947	4.00149	6.84718	5.11066	5.8127	6.2092	10.3303	7.65947	0.913565	7.4342	3.76633	7.04312	1.3374	5.33331	7.80038	6.50182	8.83516	5.81489	9.11745	10.5676	7.55325
TCGA.A1.A0SM	Highrisk	3.16948	2.1913	8.3199	7.59752	1.03113	8.26474	8.60917	6.98984	9.45163	9.51603	8.03537	6.0709	10.1706	9.39577	6.14679	1.65589	9.72924	7.55836	9.55071	7.9647	9.0377	10.1477	9.29019	7.92974	8.08152	7.57201	8.40875	8.91624	3.49651	6.60624	4.67857	6.05352	6.50541	9.79442	6.64824	2.57915	8.91552	2.7826	7.93877	5.15167	8.21669	9.40435	7.7169	10.1109	7.91778	8.71286	9.76746	7.9414
TCGA.A1.A0SQ	Highrisk	3.38256	1.75582	8.94725	7.66005	1.19279	8.61188	7.16146	6.701	8.68181	9.7319	8.20059	6.38516	10.3711	9.53941	7.10129	2.86375	10.111	7.59271	9.40938	7.51293	10.0966	10.2895	9.3328	8.13703	7.40107	7.52223	7.9627	9.03909	3.28969	7.00988	4.77831	5.25842	6.65195	10.3536	7.34924	3.35362	8.83154	3.33161	7.56283	5.39401	8.37265	9.02341	7.35851	9.64073	8.10837	8.8978	9.39905	7.84766
TCGA.A2.A04P	Highrisk	1.12407	1.00139	6.84222	5.68488	-0.105645	7.69866	7.03412	6.04491	8.25454	8.73225	7.95438	3.48427	10.0604	9.28843	6.51013	1.12408	8.96804	7.50284	9.73521	6.77047	8.69843	8.74543	9.25574	7.74116	5.4147	7.80021	7.8329	8.37587	3.23362	6.30134	4.72584	4.52068	5.51976	9.54578	5.86084	2.08768	7.23906	2.26956	7.44792	4.81896	6.18554	7.82266	7.47318	9.28375	7.61854	8.23489	9.24665	6.88092
TCGA.A2.A04T	Highrisk	2.08737	1.15188	7.46205	6.12224	0.0681319	7.6363	6.07748	6.23678	8.78178	8.87352	7.8454	3.43062	10.3223	9.39523	6.74261	1.59759	9.21767	7.66845	9.57766	6.07918	9.86185	9.5038	8.51573	7.64692	6.29063	8.06096	7.98846	8.72191	3.89754	6.16239	4.92239	4.90937	6.192	9.85809	7.36573	1.94057	7.72759	3.36584	7.78439	4.57143	7.31619	8.5106	6.3019	9.25674	7.66013	8.69758	10.0925	6.99017
TCGA.A2.A04V	Highrisk	2.63983	1.51064	8.49774	6.75877	0.712781	8.74096	7.13775	6.47139	8.57917	9.4596	8.51992	5.36619	10.4348	9.58106	7.4017	1.88114	9.78619	7.59786	9.54249	7.0673	9.45045	9.8696	9.3399	8.18417	6.88035	8.1066	8.38812	8.8508	3.97569	6.87046	4.90604	5.79616	6.08802	10.4114	6.5941	2.69683	8.50221	3.59352	7.80314	4.85674	7.63264	8.71196	7.2478	9.34131	8.35012	9.40608	9.13114	7.94916
TCGA.A2.A04W	Highrisk	2.5953	2.24036	8.54316	7.2297	0.901831	8.084	7.67205	6.83139	9.48013	9.51981	8.1668	5.38865	10.3609	9.30285	6.16376	1.89781	9.4842	7.45718	9.68486	7.98885	9.35585	9.78467	9.3838	7.91435	7.864	7.72454	8.01561	8.87978	3.01121	6.18727	4.69709	5.42617	6.4899	10.4936	6.1477	3.17246	8.6984	2.71873	7.90333	4.98127	7.74101	9.15071	7.57806	9.91058	8.27019	8.49007	10.3158	7.39812
TCGA.A2.A0CM	Highrisk	1.15594	-0.476924	6.43069	5.22701	-0.937544	7.24655	6.38478	5.73949	8.01757	8.67549	7.74461	2.42591	9.82874	9.24912	6.63729	0.357828	8.63846	7.43217	9.7682	5.51166	9.39201	8.83186	8.0929	7.61497	5.09704	7.89012	7.57581	7.9566	2.70493	5.55858	4.78294	4.17116	5.58694	7.65222	4.99516	0.429026	7.0404	2.21463	7.29413	4.81225	6.54917	8.16531	6.11314	9.00385	7.36494	8.71555	9.04698	6.93769
TCGA.A2.A0CR	Highrisk	0.829802	0.412563	6.88878	5.16085	-0.171877	8.25484	6.76733	6.06396	8.08435	8.56605	7.45511	3.88284	9.77262	9.27023	6.85753	0.964981	8.5047	7.24386	9.5492	6.69173	8.26793	8.60906	8.97404	7.82533	5.04677	7.66684	7.26315	6.94049	2.1432	5.64793	4.4227	4.14747	5.47066	8.10377	5.27847	1.70833	7.8227	2.15691	7.19355	6.86646	5.55479	7.2587	6.57975	9.00568	7.63045	7.7515	8.39442	7.29208
TCGA.A2.A0CS	Highrisk	2.59659	1.44356	8.49066	7.29926	0.625208	8.43998	7.33049	6.38952	9.00511	9.54954	8.28026	5.79072	10.2989	9.54118	6.96109	1.98229	9.42969	7.70035	9.54088	7.38203	9.48308	10.0851	9.47449	8.13619	7.74783	8.01394	7.92913	8.59728	2.89201	6.26202	4.79618	6.00325	6.51403	9.67439	6.39871	2.42999	8.56037	2.75772	7.86207	5.51686	7.36029	8.41433	7.2659	9.7172	8.29028	9.08125	9.58457	7.68345
TCGA.A2.A0CT	Highrisk	3.54518	2.2176	8.53361	7.59864	0.962391	8.19203	6.88327	6.64883	8.65843	9.81576	8.58801	6.55393	10.4378	9.64587	7.0558	3.40585	10.3284	7.85257	9.55119	7.75103	10.3028	10.0294	9.25151	8.23511	7.39459	8.06546	8.35528	9.60227	3.53214	6.9689	4.88349	6.59335	6.37838	10.3587	7.28236	2.87095	8.64899	2.76476	7.49949	5.1742	8.59984	9.23533	7.68167	9.11735	8.46679	9.50456	9.49074	7.58125
TCGA.A2.A0CU	Highrisk	3.45897	2.60772	9.60203	7.90152	1.77461	9.04866	6.57071	6.68376	9.26439	10.1704	8.72709	6.34399	10.5837	9.65319	7.50907	3.418	10.0927	7.90225	9.47378	7.58857	10.149	10.2274	9.68568	8.21173	7.73816	8.12488	8.84606	9.35137	4.52819	7.40841	4.94536	6.2061	6.86121	10.5937	7.83794	3.98168	9.0228	4.03137	8.04711	5.55401	8.51944	9.36538	7.44084	9.64552	8.56695	9.51161	9.7502	8.40232
TCGA.A2.A0CY	Highrisk	2.06396	0.980931	7.58996	6.10084	0.189514	8.53689	7.70403	6.43449	9.16329	9.3733	8.19577	4.77533	10.7177	9.61095	6.78597	2.31719	9.56019	8.06071	9.99618	7.17745	10.2721	9.8508	9.52567	8.10306	7.38087	8.56096	8.04334	8.09602	3.37131	6.33041	5.0467	4.82105	6.12706	10.2752	7.28542	2.17247	8.37061	3.45384	7.61633	4.80267	6.83098	8.47606	7.19896	9.56584	8.2826	9.01933	9.83638	7.68178
TCGA.A2.A0D1	Highrisk	3.04523	0.319927	8.27812	6.2808	-0.0465959	8.02984	6.73913	5.9741	8.36071	8.92785	7.7504	4.62412	10.6093	9.53982	6.09276	1.67766	9.43489	7.60652	9.52296	6.47965	9.36512	9.59793	8.74816	7.91505	6.91811	7.62705	7.00127	7.90233	2.97842	6.06506	4.80769	6.21238	6.34226	10.1918	6.7423	1.7792	8.41885	2.86352	7.22128	4.24125	7.57555	8.59745	7.25855	9.03944	7.49255	8.32556	9.10646	7.43001
TCGA.A2.A0D4	Highrisk	3.50778	2.81215	9.5481	7.9039	1.6429	8.94385	6.0252	6.66583	8.93537	9.92937	8.89515	6.43625	10.8528	9.70884	7.47125	3.78256	10.5444	7.96899	9.71402	7.9879	10.6369	10.8412	9.71603	8.21763	8.11377	8.31521	9.02074	9.49054	4.62683	7.60487	5.01907	6.69901	7.0825	10.5564	8.49689	4.0183	9.31752	3.68627	8.0856	5.34949	8.79329	9.57529	7.76467	9.19424	8.91731	9.38642	9.93612	8.16845
TCGA.A2.A0EU	Highrisk	3.63488	1.9749	9.65629	7.95791	0.982026	8.7425	6.03466	6.65895	8.49033	10.2247	8.53722	6.32299	10.4339	9.6	7.30503	2.64633	9.93582	7.54964	9.56499	7.57473	10.7103	10.3846	9.70265	8.20493	7.67033	7.82041	8.4334	9.19675	4.1669	7.01364	4.91547	6.52366	6.61902	10.5345	6.25633	3.00287	8.46965	3.01087	7.96908	5.0115	8.77327	9.48397	7.55173	9.47853	8.2162	9.49618	10.1469	7.90878
TCGA.A2.A0EX	Highrisk	2.29933	1.10566	8.38744	6.55447	0.240712	8.22563	6.89426	6.36748	8.29139	9.06068	8.1648	5.38649	9.97073	9.39445	6.66273	1.40525	9.15116	7.23562	9.37537	7.11676	9.39101	9.61816	8.88997	8.06098	6.16899	7.49673	7.61275	8.44178	2.75118	6.21593	4.64903	5.64957	6.03321	10.0983	6.1413	2.04496	8.12692	2.91772	7.45692	5.06322	7.3392	8.67733	6.81953	9.25682	7.93583	8.87664	9.51983	7.45623
TCGA.A2.A0SV	Highrisk	2.02625	1.13421	7.55389	6.72314	-0.000786076	8.64872	6.9833	6.35739	7.97014	9.16964	8.08505	4.91799	10.2359	9.40665	7.40327	1.76914	9.09258	7.73511	9.74941	7.14616	10.0104	9.80294	9.04037	7.97349	7.07553	7.92627	8.1938	8.46157	3.08314	6.62852	4.73849	5.38658	6.42426	8.51185	6.29697	1.52116	8.2426	2.41753	7.84809	5.70867	7.20085	8.41006	7.27094	9.05213	8.23342	8.66235	9.19268	8.10952
TCGA.A2.A0T0	Highrisk	1.83125	0.500557	6.94637	5.93365	-0.338848	7.46802	6.76067	5.89403	8.49226	8.99755	7.80405	3.70842	10.1618	9.37749	6.34508	1.1478	9.21952	7.60632	9.78601	6.58208	8.688	9.2414	8.67112	7.77001	5.76914	7.88562	7.61427	8.08535	3.24363	5.9639	4.78459	4.53743	6.14646	8.26409	5.84297	0.977578	7.15817	2.02067	7.39362	4.45804	7.06515	8.066	6.9253	9.44147	7.30656	8.53605	8.91792	6.98475
TCGA.A2.A0T2	Highrisk	2.68169	1.39917	8.10437	7.05023	0.00736149	7.44382	7.41302	6.15104	8.6438	9.61632	8.16608	4.63006	10.3007	9.36187	6.8458	1.80358	9.28219	7.63309	9.70383	7.52222	9.41512	9.22776	9.10064	7.79448	7.10186	8.20946	7.36694	9.03919	3.34205	5.94815	4.79737	4.99233	6.30847	9.44243	6.51692	1.60919	8.2105	2.64015	7.81099	5.01577	7.61509	9.11567	7.06724	9.64512	8.16912	8.75536	9.4711	6.8052
TCGA.A2.A0T7	Highrisk	2.93315	1.71068	8.64171	7.24545	0.598585	8.34369	6.87964	6.72878	9.14942	9.29904	8.03975	5.28686	10.1754	9.43702	6.82498	1.70748	9.45021	7.61355	9.52279	7.33568	9.30325	9.78724	8.84726	7.91613	7.30522	7.84508	7.92016	8.80248	3.46547	6.01184	4.86163	5.74205	6.64421	9.685	6.29425	2.01743	8.19047	3.00315	7.91551	5.50109	8.23694	9.22118	6.93587	9.39451	7.98301	8.95319	9.68317	7.82887
TCGA.A2.A0YE	Highrisk	3.61975	1.82792	9.06683	8.53301	0.731149	8.03053	7.91227	7.16699	9.99023	9.7117	8.13814	4.94292	10.7004	9.48421	7.03269	1.89501	9.71954	7.89528	10.0039	8.09874	11.169	9.50916	8.86949	7.74018	6.99198	8.2547	8.83631	9.59998	4.19085	6.5572	5.1272	6.52148	6.81462	10.775	5.57895	2.28112	8.14817	3.39738	8.68196	4.67131	8.53015	9.7862	7.29099	10.136	7.1441	8.94209	10.8257	7.75409
TCGA.A2.A0YF	Highrisk	2.43777	1.29895	8.22249	6.59591	0.528417	8.01585	6.57363	6.58554	8.40643	9.5214	8.19904	5.64827	9.95367	9.44907	6.43373	2.38691	9.76505	7.34999	9.19355	6.80267	9.12085	10.0268	9.00968	8.01093	7.12693	7.35823	7.7784	9.15756	3.40691	6.31841	4.8033	5.88681	6.70391	9.76611	7.08811	2.07608	8.07562	2.89161	7.47305	4.90838	7.51612	8.72113	7.27798	9.48609	7.84413	9.12592	9.30694	7.25845
TCGA.A2.A0YG	Highrisk	3.77799	1.12294	8.69515	7.26723	0.143609	7.91624	7.1273	6.59214	8.50735	9.49764	8.18898	5.19108	10.3797	9.51026	5.71811	2.25712	9.55453	7.69232	9.36242	6.72967	10.1649	10.1842	9.30385	7.92519	7.2954	7.81295	7.06987	9.08784	3.31455	5.91535	4.81546	5.91924	6.82228	9.73711	7.33162	1.67268	8.18253	2.38116	7.70276	5.01765	8.94888	9.14689	7.74537	9.26888	7.82599	8.70791	9.5853	7.64802
TCGA.A2.A0YH	Highrisk	2.88197	1.89413	8.13308	7.40161	1.19792	8.4849	6.71005	6.60793	8.67186	9.05609	8.32289	4.94792	10.0938	9.40926	7.21277	2.25305	9.4095	7.57787	9.3167	7.17164	10.1238	10.041	8.7977	8.01541	7.43022	8.12775	8.31845	9.16715	4.11654	7.06381	4.8003	6.41431	6.4354	9.90854	6.82935	2.93285	8.70203	3.14558	7.78211	6.01489	7.96988	8.90214	7.07231	9.21522	8.61821	8.96992	9.4821	7.64331
TCGA.A2.A0YJ	Highrisk	4.09737	1.35367	8.80939	7.16624	0.280395	6.7819	6.8118	6.19705	9.09087	9.74756	7.90063	4.28094	10.3239	9.29814	5.91392	1.9145	9.59007	7.37999	9.61016	7.08655	10.5494	9.62034	9.4007	7.59452	7.90559	7.81504	7.89845	9.27273	4.3828	5.79845	4.93585	5.65387	6.48021	10.0675	6.0908	1.93097	7.89829	3.53975	8.22428	3.01849	9.20624	9.34046	6.80971	9.8216	7.45888	8.80196	10.5505	6.43948
TCGA.A2.A0YK	Highrisk	1.32708	0.396711	7.169	5.23253	0.104176	7.82663	6.1976	6.21566	8.25209	8.26086	7.22025	4.17666	9.35224	9.12469	6.46275	0.994937	8.60269	6.67519	8.88035	6.38486	8.28313	9.02589	8.02627	7.61675	5.22862	6.62658	7.07518	8.03443	2.57561	5.82377	4.57066	4.14804	5.8591	9.10844	5.741	1.8005	7.24144	2.51823	7.28937	5.3718	6.35094	7.76965	6.54904	8.99083	6.77475	8.16152	8.58523	7.25553
TCGA.A2.A0YT	Highrisk	3.57899	1.48034	9.22035	7.295	0.630285	8.52288	6.98798	6.44411	8.50463	9.66811	8.61161	5.27932	10.4656	9.54385	7.27848	2.87381	10.0463	7.6454	9.40021	6.73984	10.6618	10.0775	9.29281	8.1544	7.57676	7.89532	8.28408	9.01022	3.95123	6.96961	4.88928	6.20132	6.69615	9.94832	7.58521	2.63019	8.53665	3.22026	7.77674	5.46808	8.65873	9.34159	7.53073	8.97383	8.70272	9.16428	9.94093	7.86845
TCGA.A2.A1FV	Highrisk	3.49128	1.91586	8.50414	7.15572	1.13125	8.62053	5.93313	6.10544	8.41781	9.41192	7.88955	5.88197	10.1225	9.48647	7.37167	2.95042	10.0265	7.19776	8.89675	6.68972	10.2699	10.109	9.19961	8.01414	6.77087	6.736	8.37586	9.74698	4.42982	7.51804	4.83875	6.23528	6.44248	11.5228	8.25352	3.08098	8.26437	3.7018	7.5825	2.93072	8.3694	9.36097	7.55371	9.09136	7.23888	9.59004	9.48529	7.74509
TCGA.A2.A1FW	Highrisk	2.91199	1.43714	8.9142	7.08545	0.961864	8.86935	6.96575	6.5407	8.79142	9.29401	8.37106	6.17554	10.4102	9.61429	7.31823	2.5936	10.2574	7.55383	9.19411	7.05732	10.2522	10.4363	9.4728	8.10147	7.06418	7.7347	8.68251	9.31938	4.89598	7.3587	5.00685	6.18025	6.6737	11.0822	7.87779	3.09708	8.50624	3.87977	7.64196	4.64611	7.96348	9.02207	7.57174	9.16769	7.96253	9.32795	9.95368	8.05127
TCGA.A2.A1FZ	Highrisk	2.70565	0.720442	8.19999	6.76714	0.276692	8.38409	7.11774	6.48622	8.52995	9.19616	7.75065	5.36239	9.87694	9.35437	6.72043	1.45203	8.98289	7.23799	9.32215	6.9066	9.15992	9.61887	8.65832	7.87678	6.43086	7.37656	7.57859	8.7045	3.06736	6.09018	4.73334	5.06106	6.50197	9.37879	6.16314	1.83488	8.13755	2.57152	7.76854	5.4449	7.7715	8.75458	6.90057	9.2404	7.45279	8.73488	9.19084	7.82361
TCGA.A2.A1G0	Highrisk	2.72442	1.28207	8.65379	6.77681	0.710788	8.09884	6.30816	6.29648	8.21935	9.30957	7.9339	5.53011	9.78993	9.40519	6.69776	2.00048	9.33968	7.3371	9.12403	7.00416	9.76677	9.7703	8.65133	7.94766	6.30722	7.32921	7.9323	8.90237	3.40339	6.84644	4.73745	5.39123	6.33413	9.91562	6.52228	2.26266	8.08104	2.95376	7.51441	5.70439	7.8386	9.0532	7.05305	9.2732	7.74608	8.98106	9.03374	7.5946
TCGA.A2.A1G1	Highrisk	2.0799	0.0573379	7.63499	6.25166	-0.179391	7.2669	6.80577	6.44038	8.9333	9.05787	7.87564	4.06609	9.60165	9.13486	5.66478	0.687917	8.69246	7.24319	9.63819	6.12576	10.095	9.22262	8.5408	7.67673	5.45826	7.70084	8.60633	8.64699	3.42481	6.62638	4.86284	4.70063	5.79567	9.52438	4.25158	0.947963	7.59635	3.21776	8.12508	4.19063	7.5064	8.53755	6.80122	9.61322	7.06626	8.98549	9.87636	6.66408
TCGA.A2.A1G4	Highrisk	3.35308	1.12477	9.09596	7.03691	0.853224	8.63446	6.40452	6.65292	8.3085	10.0512	8.32981	5.57493	10.3434	9.57303	6.76913	2.67283	9.81095	7.65999	9.32069	6.70462	10.4903	10.0316	9.22155	8.08333	6.67083	7.69962	8.33426	9.07872	3.96228	7.25134	4.91498	5.66868	6.34611	11.1308	7.1849	2.48928	8.2453	3.69051	7.67746	4.78394	8.44433	8.76068	7.52765	9.05881	7.85909	9.21965	9.44019	7.7314
TCGA.A2.A1G6	Highrisk	2.33192	1.06335	8.33048	6.484	0.50481	7.88574	6.84262	6.65292	8.8403	9.06955	7.70027	5.1369	9.67483	9.32857	6.69582	1.59217	9.01019	7.04691	9.32409	7.15267	9.38417	9.36697	8.59002	7.86467	5.92767	7.04899	8.13932	8.78334	3.33486	6.33249	4.7921	4.76574	6.39749	10.1654	5.9787	2.3994	7.80825	2.97267	7.60726	4.6294	7.2021	8.80769	6.73773	9.27044	7.16677	8.81867	9.46919	7.30081
TCGA.A2.A25A	Highrisk	1.91176	0.964244	7.71746	6.09272	0.250983	8.2976	6.61229	6.60493	8.60245	8.71792	7.60037	4.53525	9.78029	9.27327	6.87211	1.00735	8.88254	7.06218	9.40434	6.7848	9.13262	9.34401	8.68596	7.79318	5.68877	7.05477	8.08524	8.61376	3.00046	6.289	4.7142	4.58205	6.20498	9.4955	5.79127	2.09529	7.69416	2.77203	7.69366	4.97278	6.93738	8.59538	6.60001	9.24328	6.98051	8.7519	9.20715	7.5354
TCGA.A2.A25B	Highrisk	3.62652	0.766482	8.6845	7.49312	0.449466	8.62568	7.59982	6.50312	8.59671	9.52428	8.44446	5.4093	10.1405	9.49369	6.80312	1.76913	10.0854	7.60991	9.45322	6.9315	10.3376	10.8006	9.31347	8.08229	7.29781	7.84279	8.64291	8.83768	4.17064	7.14402	4.85259	5.91654	6.83647	10.5744	7.29469	2.14251	8.47146	3.14812	7.95685	4.64579	8.60871	9.72091	7.47436	9.40894	8.21056	9.20341	9.65546	7.79502
TCGA.A2.A25C	Highrisk	2.06844	0.633749	7.84163	6.60071	0.184351	7.92815	6.47513	6.42255	8.3221	8.80354	8.15806	5.05211	10.0641	9.44787	6.36239	1.57268	9.18468	7.35599	9.37688	6.56381	8.67907	9.69488	8.58351	7.98116	6.7333	7.57965	7.97088	8.58158	3.08508	6.17186	4.88883	5.37115	6.56618	9.67848	6.63723	1.58191	7.98791	2.57012	7.64973	4.96533	6.91097	8.34858	7.05663	9.18874	7.67022	9.13985	8.79152	7.40839
TCGA.A2.A25D	Highrisk	1.21255	1.02858	7.03415	5.77953	0.361166	8.39677	6.713	6.1273	8.04805	8.95692	8.11259	4.59854	9.94429	9.40343	7.17459	1.9691	9.08392	7.60446	9.54931	6.72065	9.33955	9.393	9.02787	8.01048	6.01765	7.86051	8.17079	8.03893	3.31411	6.84859	4.70246	4.63836	5.67505	8.81795	6.85775	2.35066	7.91945	2.36925	7.24717	5.85783	6.44798	7.63258	7.18571	8.74183	8.53124	8.49792	8.75837	7.49421
TCGA.A2.A3XS	Highrisk	1.75097	1.12105	7.12899	6.17951	0.197927	7.43724	5.99213	5.98771	8.50445	9.11676	7.74846	3.64016	10.2781	9.40737	6.65132	1.48606	9.08821	7.69827	9.62223	6.59846	9.67486	8.94288	9.02413	7.63326	6.31891	8.04907	7.67354	8.65623	3.36845	5.65409	4.76858	4.5932	6.1191	8.90176	6.50675	1.71866	7.56132	2.50695	7.598	5.25853	6.73135	8.47114	6.65395	9.4386	7.69189	8.33963	9.40269	7.00054
TCGA.A2.A3XU	Highrisk	2.22325	0.574576	7.85652	5.93844	-0.553167	7.78795	7.92252	5.72339	8.28512	9.35996	8.12349	4.2921	10.7342	9.64087	6.99991	1.9406	9.98424	8.54008	10.6197	6.91499	8.69749	9.05419	9.8633	8.04506	6.14733	8.84891	7.96924	7.79879	2.67563	6.03358	4.93628	4.78543	5.9186	8.87194	7.36643	0.896704	7.77283	2.54879	7.18373	4.49964	7.24763	7.97037	6.97977	9.29766	8.06335	8.83843	10.2575	7.21353
TCGA.A2.A3XV	Highrisk	1.86734	1.05913	7.92212	5.65031	-0.152788	7.80389	8.16367	6.07395	8.18678	9.37341	7.97739	5.05422	10.3518	9.45305	6.30766	1.79606	9.03544	7.5051	9.96491	7.74728	8.68677	9.37024	9.9477	8.10319	6.87018	7.67103	7.18258	6.71702	2.08612	5.3963	4.53176	4.57033	6.15481	8.40643	6.76912	2.02746	8.26442	1.02627	6.74418	5.12426	6.68459	7.89663	7.08724	8.97359	8.1502	7.75475	9.41498	6.85395
TCGA.A2.A3XX	Highrisk	2.54228	1.31441	7.71687	6.17894	0.238749	7.43515	6.30211	5.84639	8.29299	8.92282	7.80907	3.79754	10.3011	9.42071	6.82856	1.77374	9.46787	7.7986	9.59152	6.8118	9.50367	9.16373	8.67202	7.66456	6.94676	8.39427	7.33229	8.3306	2.98051	5.55069	4.82464	5.1622	6.28891	8.97475	6.56125	1.97454	8.09697	2.46467	7.7548	5.49319	7.62176	9.04534	6.87744	9.38046	8.01971	8.48994	9.17225	7.24516
TCGA.A2.A3XY	Highrisk	1.45537	-0.157258	6.7658	5.18817	-0.679874	7.72421	6.39466	6.04708	8.20897	8.16998	7.19552	2.66655	9.96802	9.20835	6.69361	0.0524184	8.32563	7.09491	9.60972	5.90543	8.71829	8.4615	7.71792	7.55577	5.05461	7.75503	7.16825	7.64871	2.65869	5.08205	4.72267	4.06802	5.63766	7.705	4.69829	0.902971	7.15306	1.90106	7.33036	5.51103	6.46273	8.17415	6.13885	8.94899	6.97025	8.13189	9.17064	7.48739
TCGA.A2.A4RX	Highrisk	2.00478	-0.0188028	7.74105	6.71445	-0.476883	7.46619	5.92686	6.51546	8.6153	8.42896	7.03383	3.57693	9.65693	9.08584	6.05708	-0.120807	8.70342	6.676	9.54583	6.58254	9.43866	8.6734	7.81012	7.48505	4.88281	6.99193	7.24175	8.555	2.73599	5.29068	4.64347	4.4023	6.10095	9.00026	4.16204	1.29454	7.23782	2.5419	7.96706	4.14935	7.10974	8.71482	6.11348	9.36268	6.25713	8.40839	9.15874	7.36219
TCGA.A2.A4S0	Highrisk	2.31631	0.527718	8.46727	6.35362	0.0969478	8.48492	6.31029	6.15374	8.1843	9.55127	8.04544	5.33393	10.3665	9.57848	7.33222	1.85843	9.41331	7.57054	9.45613	6.49884	9.4436	9.25268	9.06367	8.21195	6.51952	7.50028	8.17871	8.05225	3.1432	6.4504	4.81791	4.63958	6.42882	9.41642	6.97628	1.91854	8.13864	2.81487	7.17299	5.41345	7.31573	7.92264	6.72559	9.44264	7.88092	8.98439	9.35393	8.0122
TCGA.A7.A0CH	Highrisk	2.77625	0.819691	8.29903	6.68702	0.329052	8.15513	7.10015	6.41874	8.4728	9.24944	7.92638	5.73173	10.1618	9.49069	6.40147	1.7388	9.17782	7.39716	9.36945	6.93478	9.24673	9.86349	8.79409	8.00713	7.0526	7.38896	7.5237	8.37266	3.02336	6.20985	4.80992	5.72537	6.57157	9.60624	6.66519	1.69672	8.04118	2.57309	7.50224	4.68711	7.44012	8.43573	7.20438	9.24088	7.61626	8.95651	9.32159	7.5944
TCGA.A7.A0DC	Highrisk	3.32025	2.73115	9.71635	7.68089	2.28093	8.03918	5.70128	6.12481	8.3618	10.0803	9.2882	6.58422	10.2121	9.64067	6.84656	3.76252	10.0597	7.40201	9.07791	7.49384	9.28686	10.2379	9.7072	8.41128	7.70302	7.7533	8.64977	9.53673	5.22198	7.80355	5.11281	6.47148	5.69315	12.5208	7.62658	4.72959	9.11524	5.06874	7.73675	2.70494	8.41706	8.93829	7.64839	9.13763	9.03272	10.2498	9.27492	6.88379
TCGA.A7.A13D	Highrisk	2.91041	1.8186	8.01049	7.73136	0.357609	7.8807	7.12692	6.44091	9.28498	9.63452	8.30498	4.1229	10.6175	9.36323	6.98066	1.16824	9.33215	7.68834	10.105	7.63614	10.1889	9.88704	9.27566	7.79001	6.88777	8.21186	8.27606	9.35457	4.19026	6.31877	5.01038	5.23738	6.14074	10.1614	6.12251	2.06305	8.39861	3.34632	8.27046	4.42678	8.04077	9.52924	6.99023	10.2035	7.96678	9.06536	10.2173	7.36686
TCGA.A7.A13E	Highrisk	2.97555	-0.342978	8.08298	5.90302	-0.573851	6.48626	5.75849	5.55924	7.75263	8.9702	7.72413	3.28332	9.93528	9.38022	5.76902	0.9129	8.56962	7.45364	9.60113	5.5292	9.63855	9.06015	8.5925	7.68673	4.91392	7.5701	7.44496	8.50015	3.62241	5.53163	4.88463	4.54195	5.79935	9.52354	5.42893	0.433194	7.10671	2.61223	7.23638	2.57149	7.82247	8.68584	6.36157	9.21313	6.71811	8.97282	9.81666	5.8692
TCGA.A7.A13F	Highrisk	3.73775	1.85827	8.93087	8.13586	0.866182	8.51997	7.4695	7.05608	8.97856	10.2562	8.30852	6.30373	10.5576	9.50347	7.29029	3.217	9.8583	7.73721	9.64875	7.74151	10.2376	10.2964	9.65722	8.08221	7.67043	7.72219	8.63884	9.13721	3.65439	7.02544	4.81135	6.07941	6.88262	10.403	7.4365	3.199	8.92339	2.9514	7.94098	5.1525	8.64379	9.62283	7.20004	9.81008	8.17589	9.10005	9.81142	7.81063
TCGA.A7.A13G	Highrisk	2.2104	1.55481	8.30765	6.42373	1.69619	8.06118	6.68808	6.30435	8.4602	9.10687	7.83366	5.90256	9.73324	9.39147	6.63316	2.23967	9.0955	7.15792	9.03676	7.34366	8.25881	10.18	8.97427	7.84746	7.07975	6.85884	8.00057	8.84183	4.03184	6.63237	4.95399	5.37203	6.45752	11.0128	7.0212	3.37882	8.20274	3.88412	7.66156	4.22302	6.84851	8.36591	7.21932	9.58686	7.59117	8.92042	9.07002	7.56716
TCGA.A7.A26E	Highrisk	2.65089	0.790334	8.45655	6.55513	0.283765	7.90822	6.9346	6.64352	8.49906	9.19668	8.11113	5.21678	9.91741	9.44828	6.22404	1.78094	9.28516	7.28256	9.10991	6.6152	9.21191	9.88894	8.94554	7.96781	6.15911	7.26208	7.61853	8.92434	3.05066	6.00623	4.77701	5.7347	6.63699	9.99777	6.65851	1.76946	7.90968	2.91419	7.50884	4.56279	7.48972	8.66848	7.11652	9.37134	7.65272	9.04291	9.42471	7.31169
TCGA.A7.A26F	Highrisk	1.56388	1.43166	7.14316	6.17708	0.584199	7.13529	6.00189	6.67435	8.99673	8.70898	7.65281	4.11608	9.5335	9.06634	5.98399	0.919032	8.46879	6.93521	9.33669	7.14028	8.59762	9.38689	8.59892	7.55162	5.3314	6.94492	7.92336	8.99619	3.72527	6.04948	4.92155	4.40169	6.00847	10.0024	5.38305	2.5129	7.15505	3.37073	7.7774	4.5121	6.78355	8.45227	6.79626	9.46012	7.2352	8.4867	9.35541	6.76889
TCGA.A7.A26I	Highrisk	2.6643	1.29695	7.55378	6.82475	1.05495	7.63626	6.50781	6.46639	8.65046	9.08896	7.85758	4.7353	9.72898	9.21765	7.11504	1.48522	8.92919	7.28451	9.49767	7.42773	8.64318	9.61529	8.75127	7.61646	6.05462	7.34349	8.42878	9.23697	3.84303	6.47164	5.0557	4.95536	6.30654	10.8698	6.32015	2.09157	7.95136	3.71111	8.01185	3.81374	7.4289	9.02209	6.93653	9.85462	7.34479	8.89134	9.34313	7.26809
TCGA.A7.A26J	Highrisk	2.27204	1.52095	8.2452	7.16851	0.933942	7.90937	7.02668	6.43908	8.53979	9.45912	8.7649	5.70324	10.0921	9.48182	7.08485	2.50118	9.76824	7.52452	9.39489	7.23789	8.80376	9.98229	9.43976	8.18527	6.59426	7.67779	8.87906	8.92699	4.52204	7.54992	4.92174	5.24396	5.82501	10.5998	7.56634	2.61722	8.41724	3.80418	7.71518	3.98596	7.53916	8.53004	7.42741	9.13417	8.46246	9.50712	9.32453	6.93792
TCGA.A7.A3IZ	Highrisk	2.9241	0.819467	8.49852	6.52113	0.696062	8.51263	5.96268	6.29986	8.02893	9.2402	7.9956	5.73572	10.4561	9.66298	6.75947	2.33567	9.67259	7.72385	9.40989	6.41696	9.8358	9.60644	9.04809	8.1154	7.20869	7.49457	8.20589	8.76389	3.61516	6.92995	4.91148	5.90648	6.45379	9.87033	6.97919	2.20085	8.22225	3.35496	7.30295	4.40934	7.74782	8.61174	7.14704	9.08478	7.55112	9.11777	9.01105	7.97879
TCGA.A7.A3J0	Highrisk	2.2657	0.719521	8.15331	6.13683	0.149553	8.44699	6.22393	6.20382	8.58173	9.44519	8.02876	5.24101	10.2757	9.51436	7.15448	1.68931	9.49489	7.6797	9.62985	6.68329	9.74566	9.53905	9.35047	8.08866	6.19484	7.66545	8.13065	7.96125	3.21215	6.46127	4.77668	4.7571	6.43854	9.79679	6.95427	1.96712	8.07269	2.99895	7.32937	5.77851	7.19656	8.09508	6.69506	9.43152	7.60777	8.69527	9.53187	7.79848
TCGA.A7.A3RF	Highrisk	2.40774	1.24994	8.57636	6.52438	0.418108	8.95476	7.41939	6.28169	8.74743	9.78484	8.09987	5.84506	10.5998	9.58443	7.76047	2.65501	9.62626	7.65568	9.67375	7.10648	9.47247	9.48534	9.60203	8.27008	7.20707	7.75986	8.43583	7.95789	3.50776	6.90563	4.75081	5.10481	6.48042	9.62254	7.45925	2.68434	8.69566	2.95772	7.3428	5.6417	7.41695	8.06108	7.14169	9.62635	8.12341	9.01231	9.69867	8.36766
TCGA.A7.A4SD	Highrisk	1.65192	-0.0336036	6.88882	6.29323	-0.659744	7.27057	6.54284	6.26895	8.57455	8.58443	7.92147	3.33479	10.0055	9.20089	6.65872	0.749701	8.4882	7.52895	9.90866	6.07663	9.55746	8.44628	8.15696	7.64335	5.31574	8.0283	8.02434	8.53356	3.14865	5.91043	4.89042	4.54031	5.69329	8.5475	4.44711	0.770204	7.32977	2.35904	7.4934	5.437	6.89995	7.9472	6.51114	9.05088	7.72007	8.63271	9.16122	6.80485
[truncated: 1,012 more rows]
[truncated: 150 more columns]
